# Supplementary material for: Imaging biomarkers of dementia: recommended visual rating scales with teaching cases
Source: PubMed Central journal article supplement (PMC5265189; doi:10.1007/s13244-016-0521-6), 2016-12-21

Healthy, 25 year of age

1

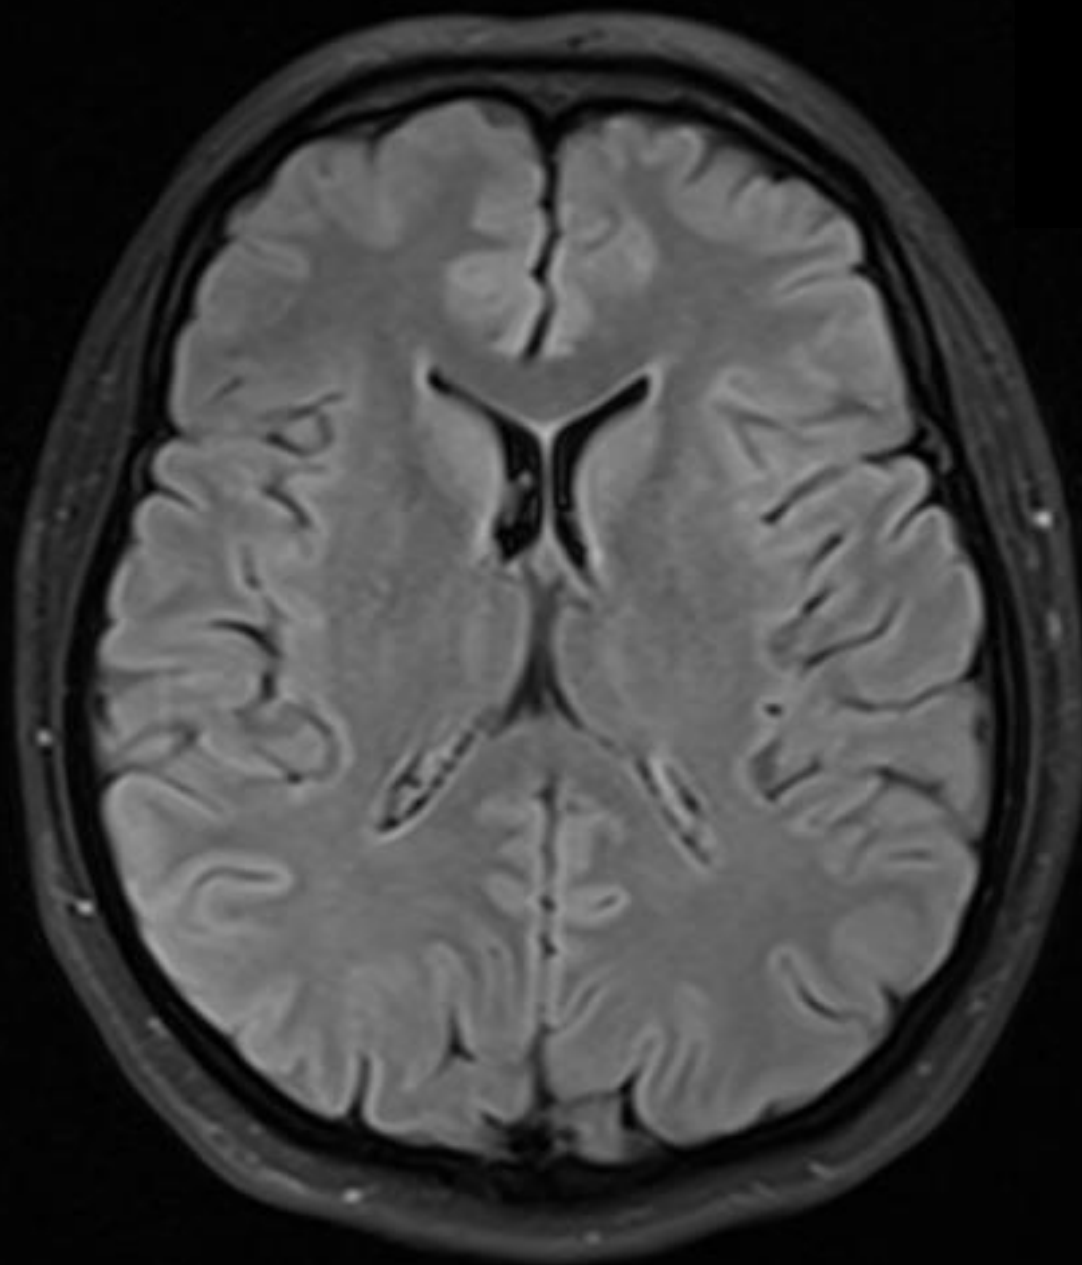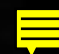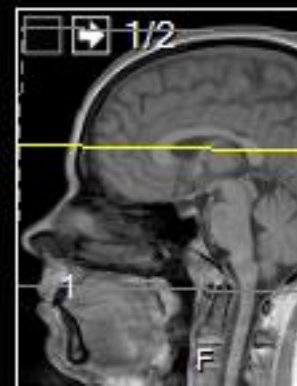

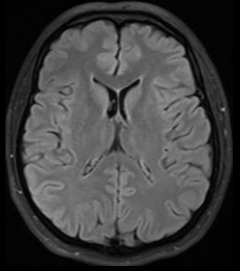

2

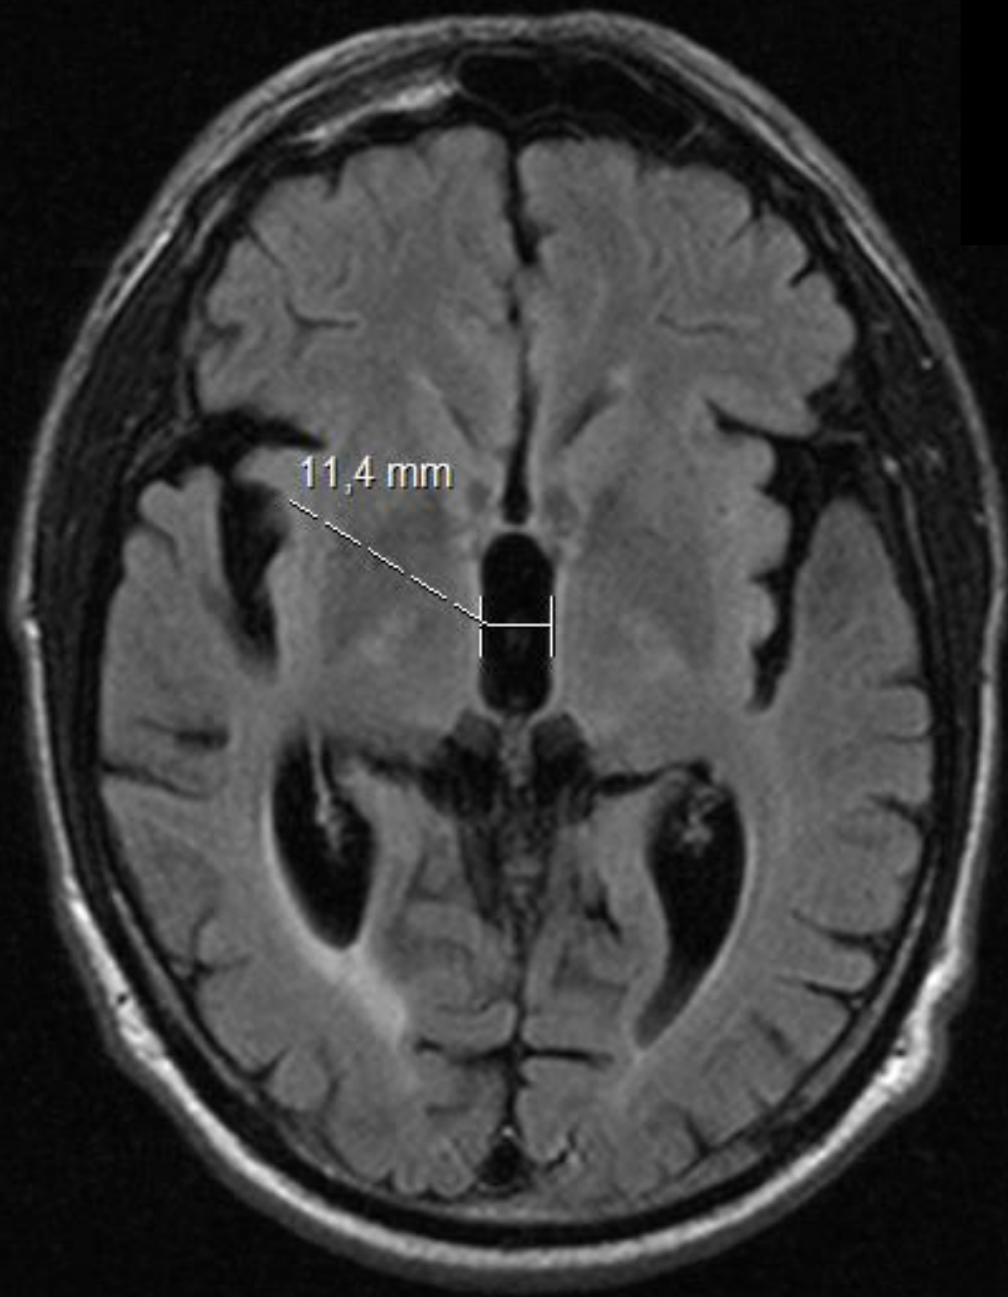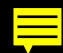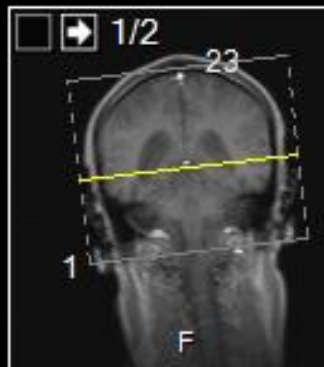



3

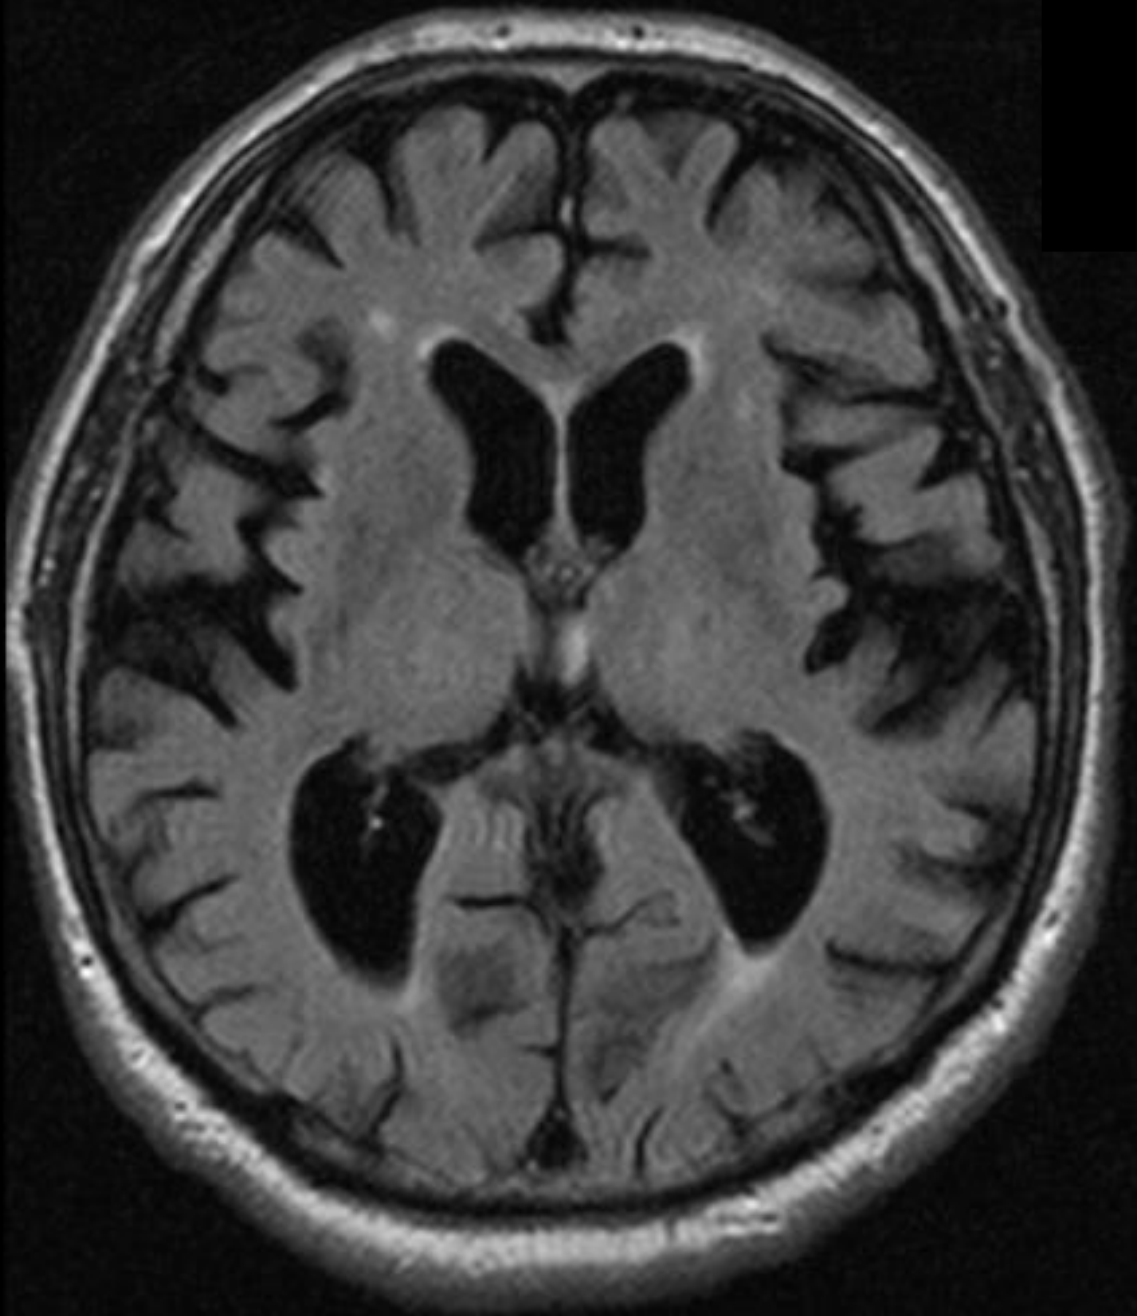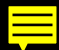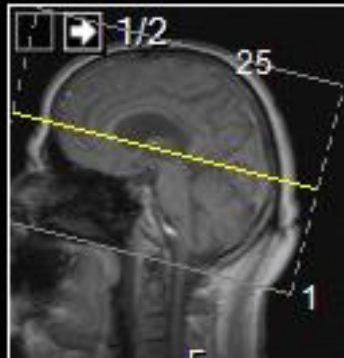



4

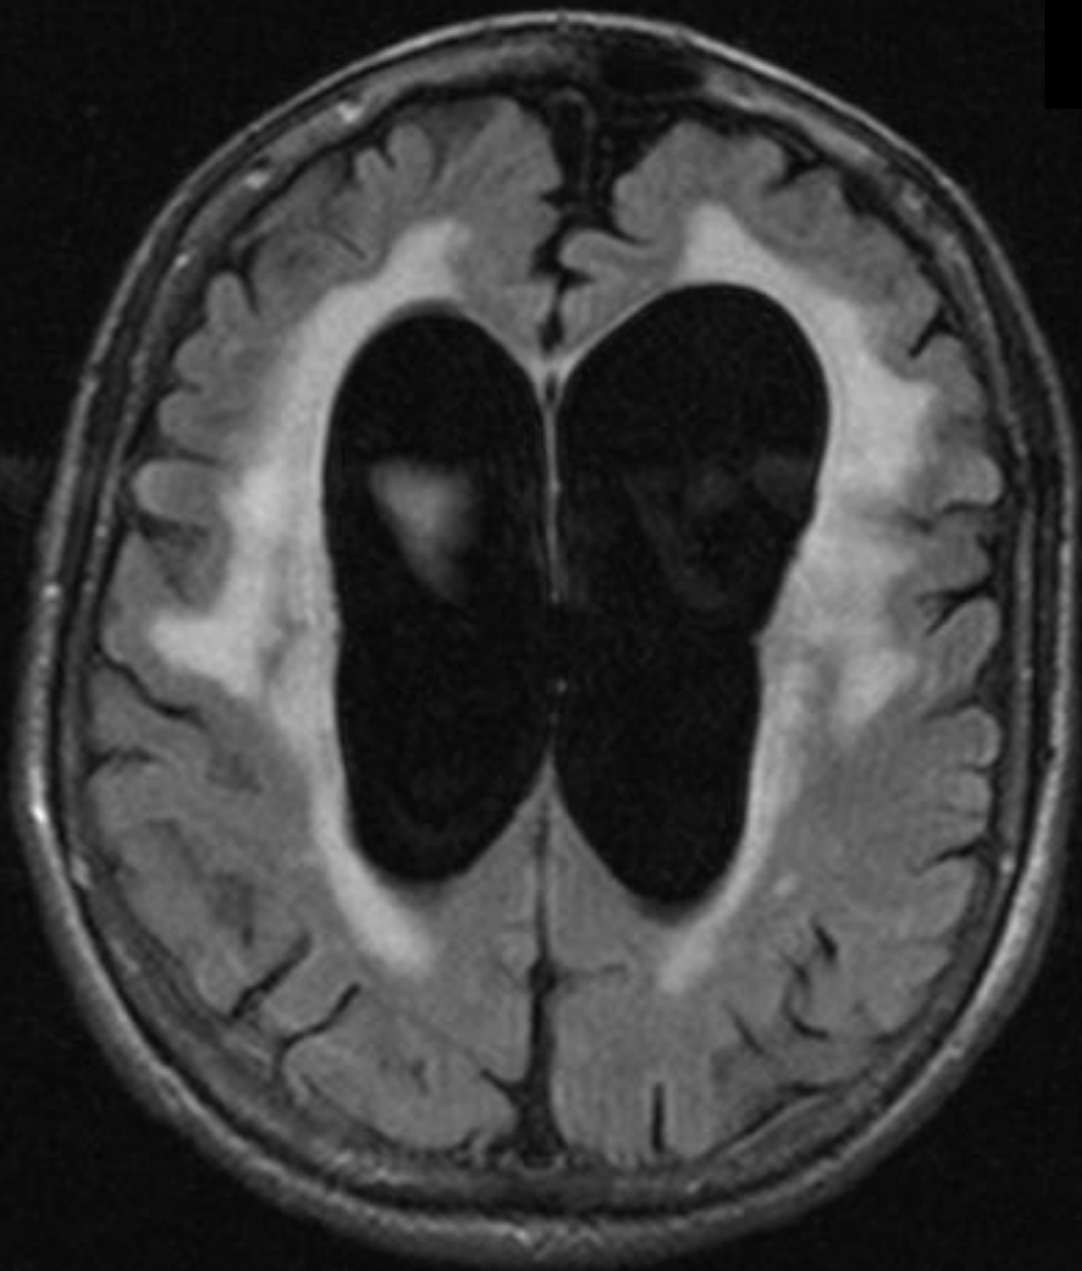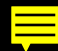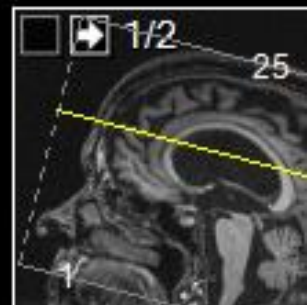

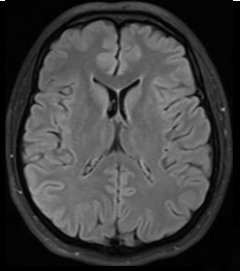

5

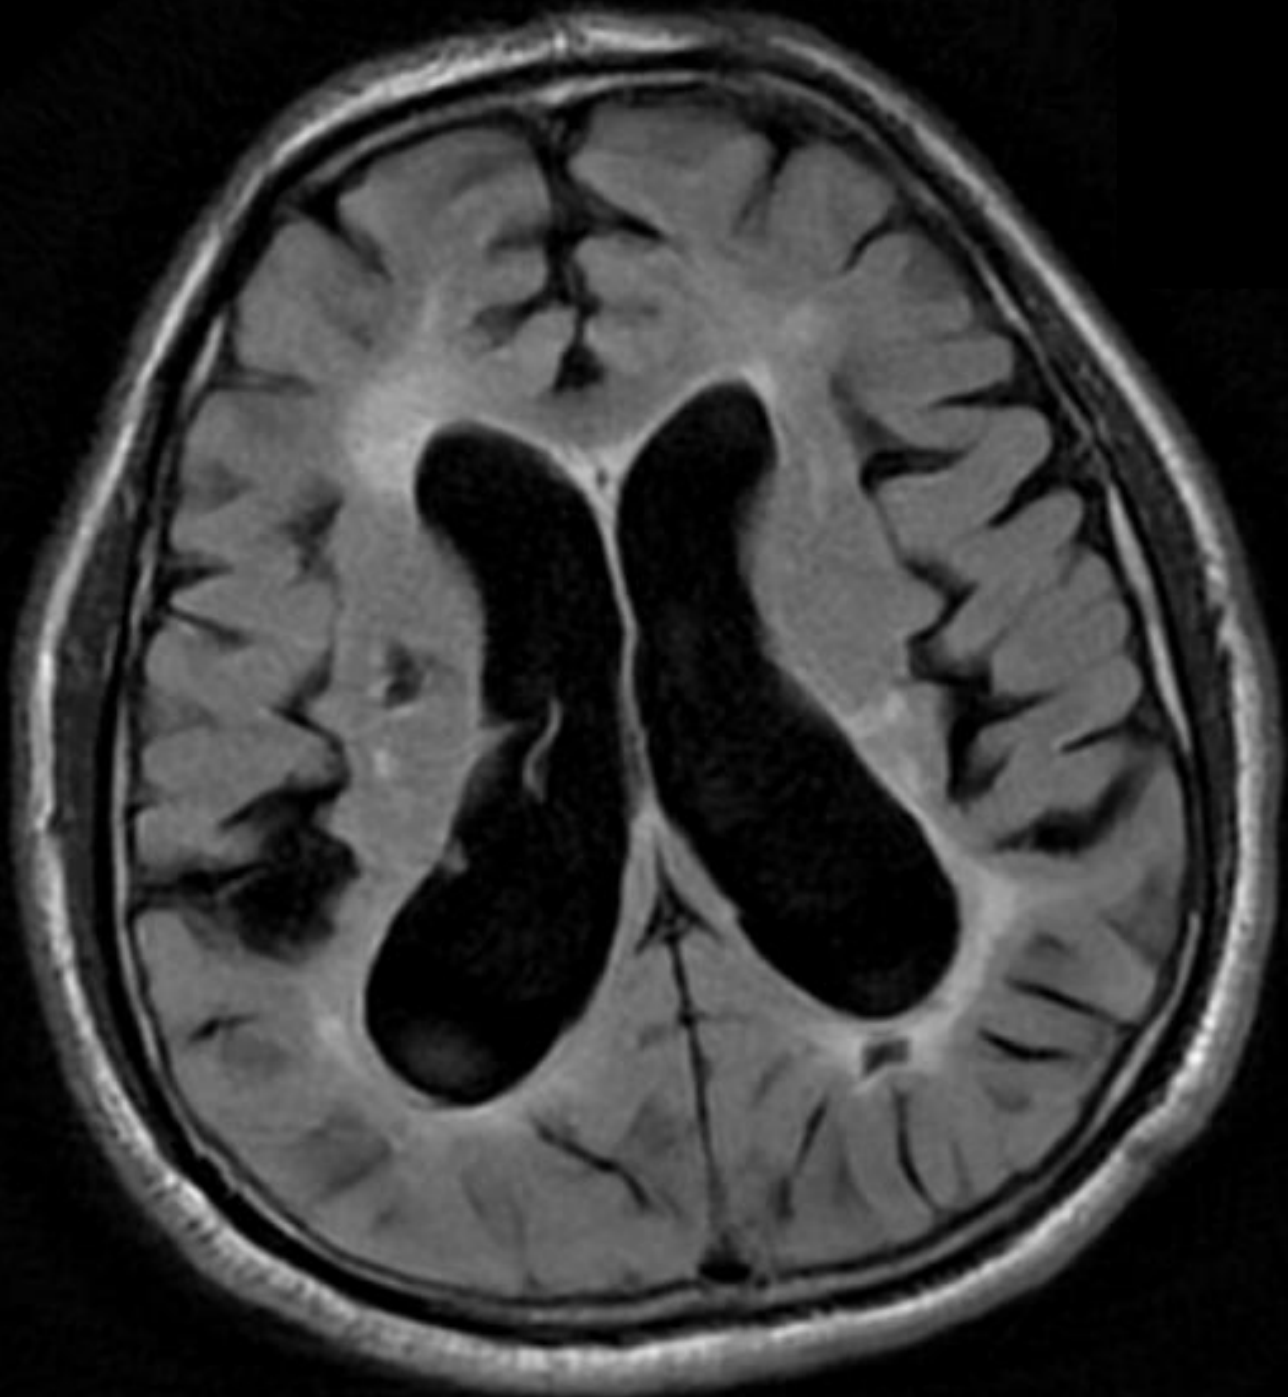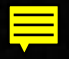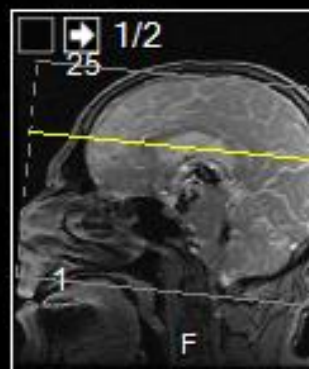



6

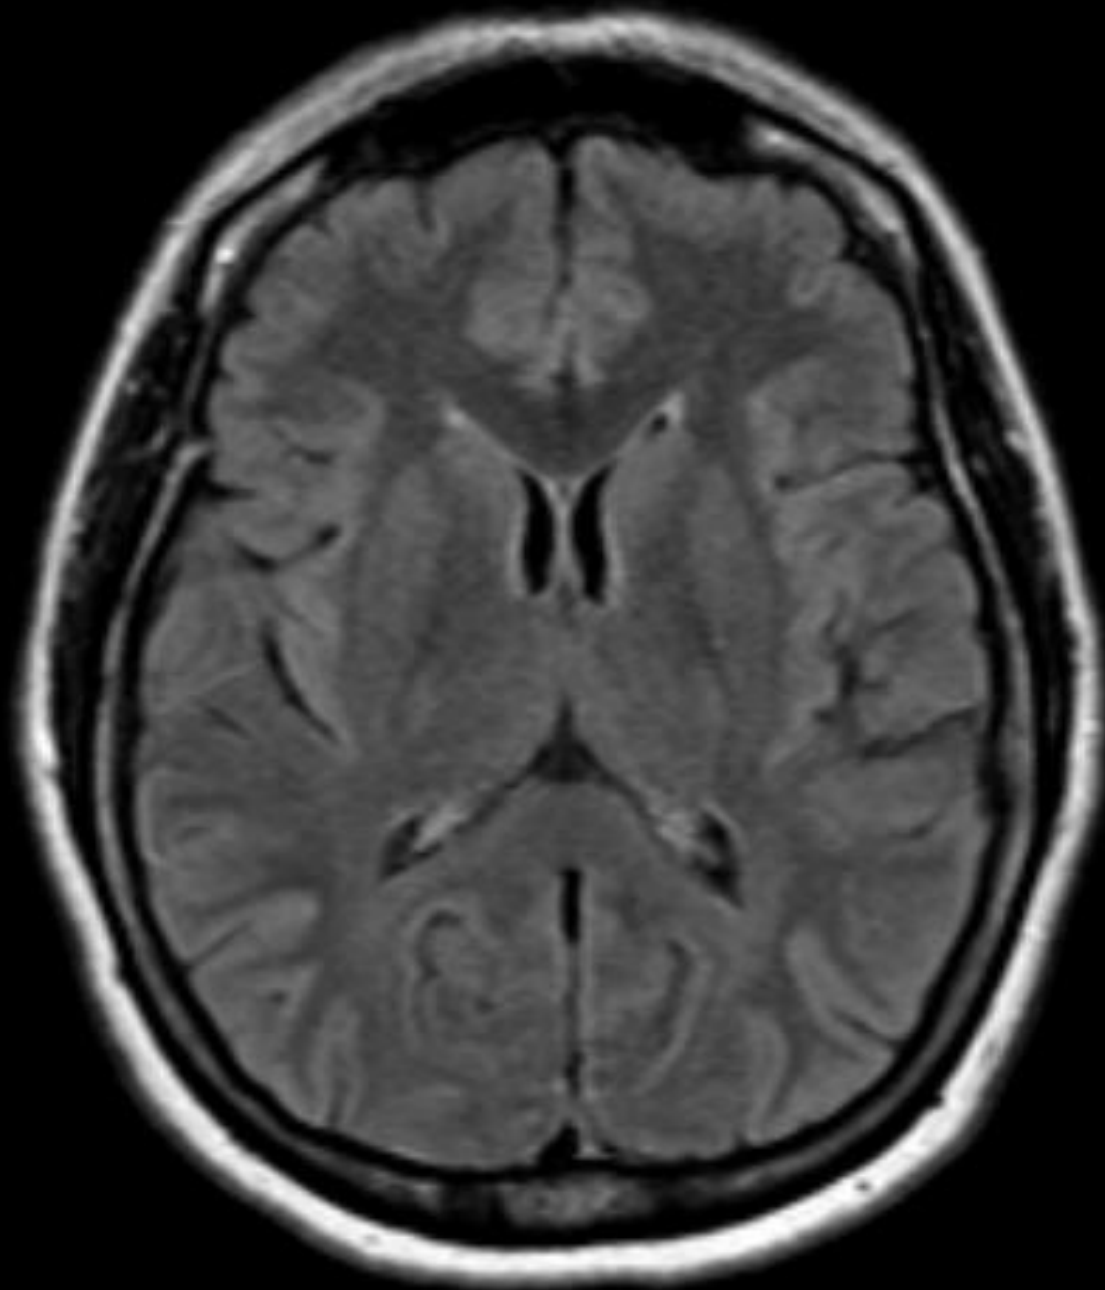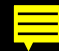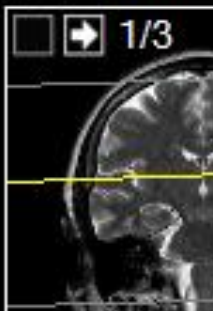

1/3



7

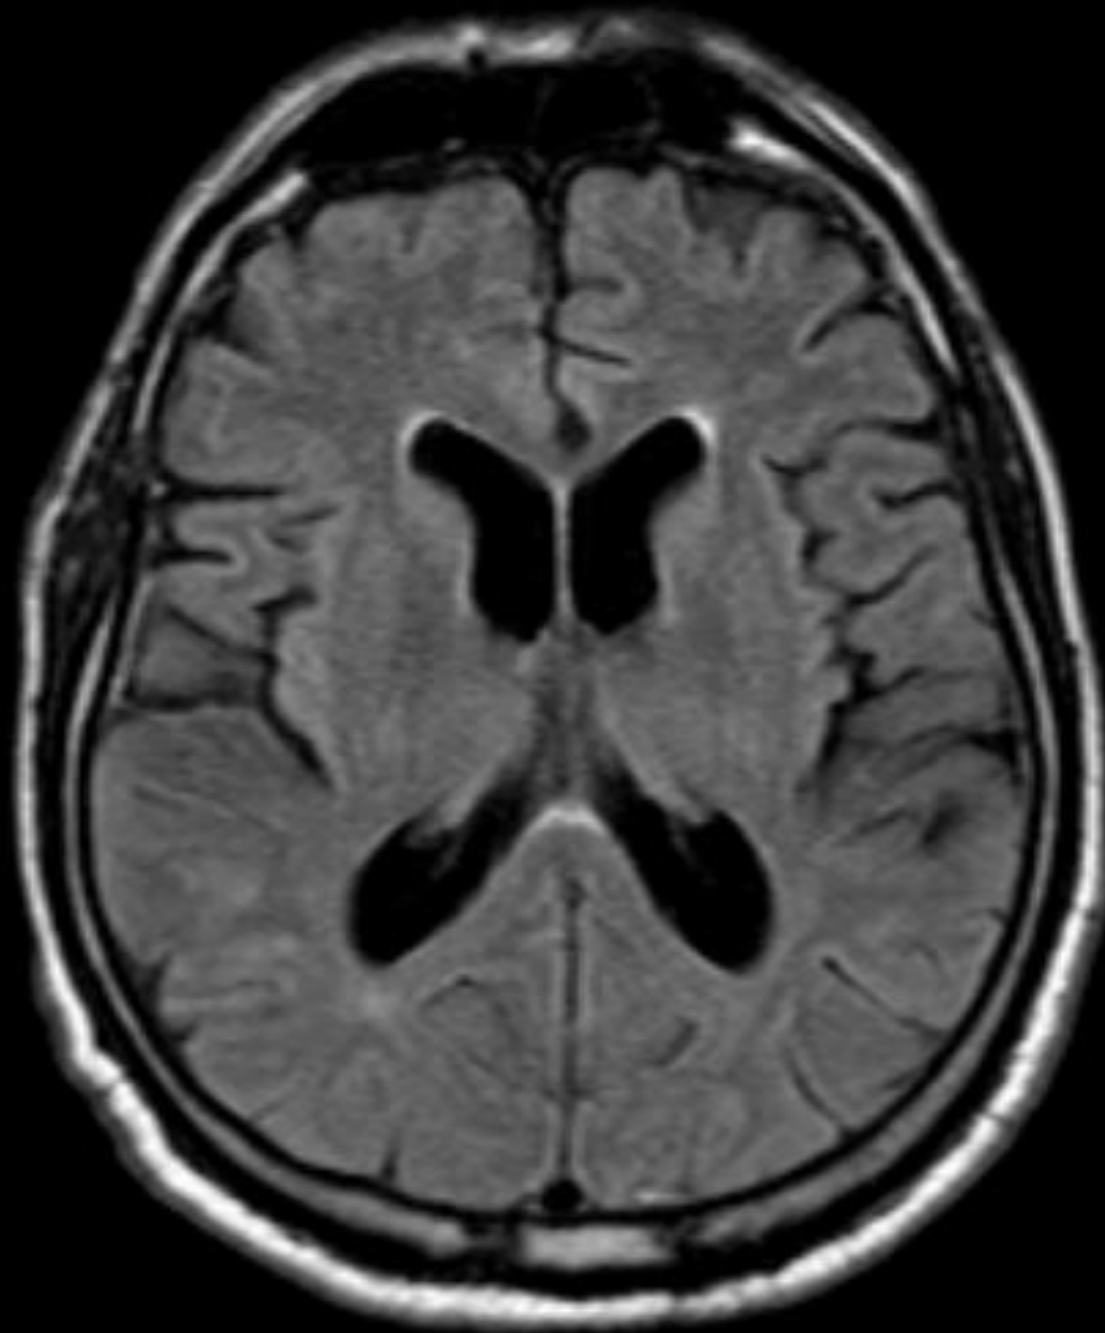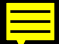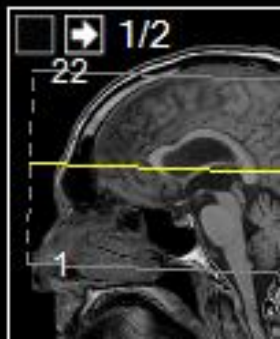

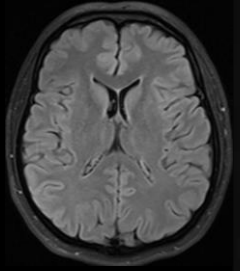

8

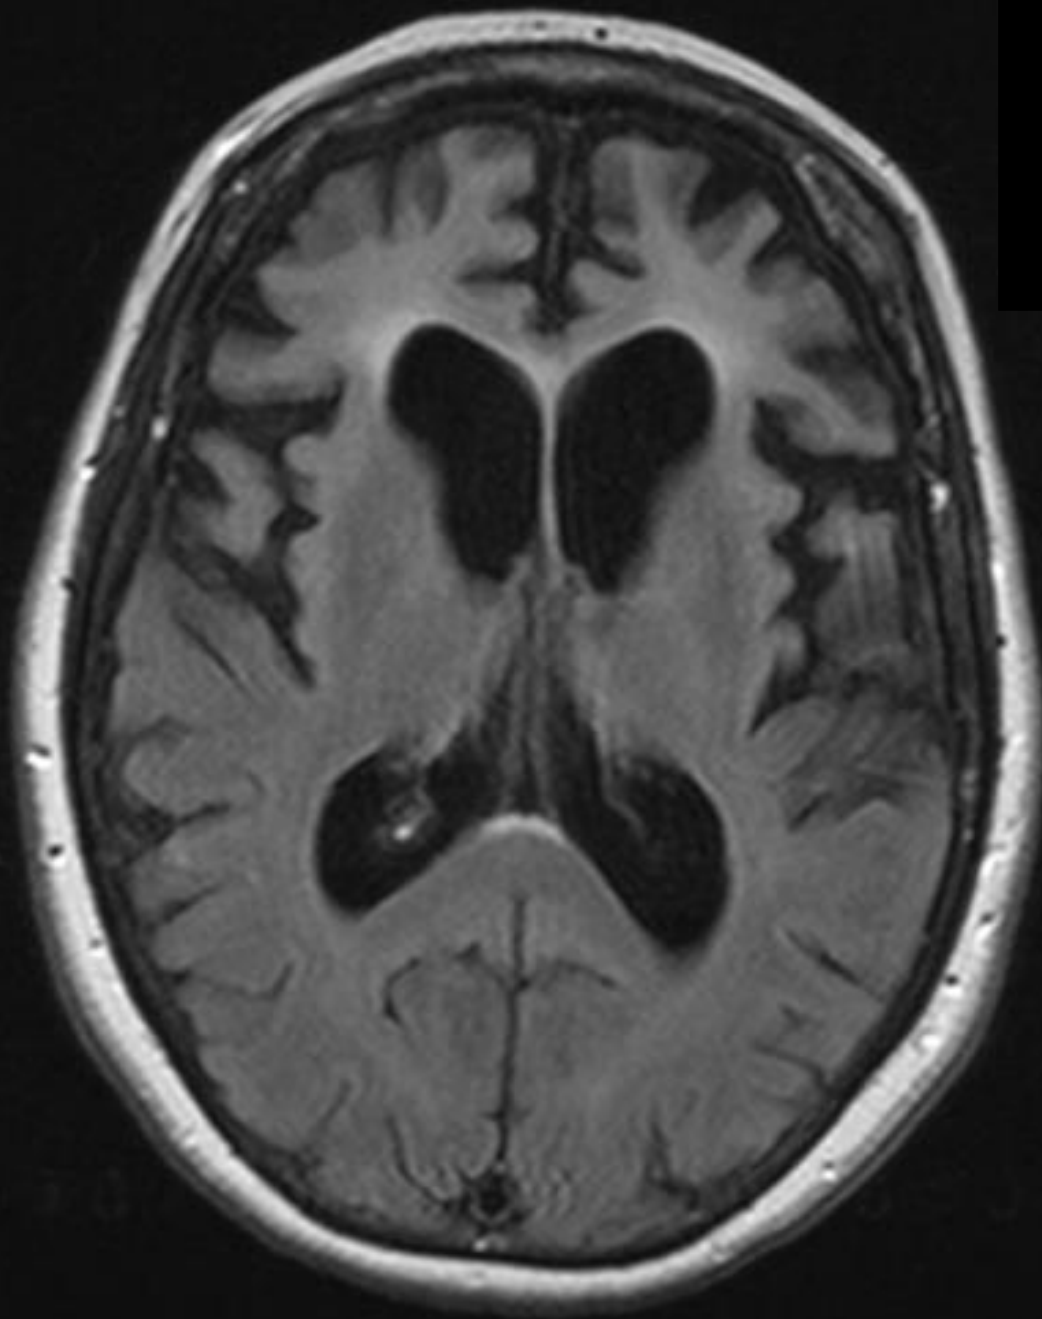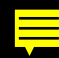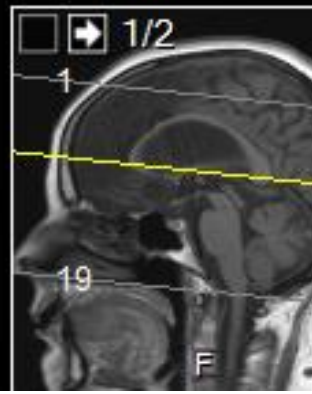





9

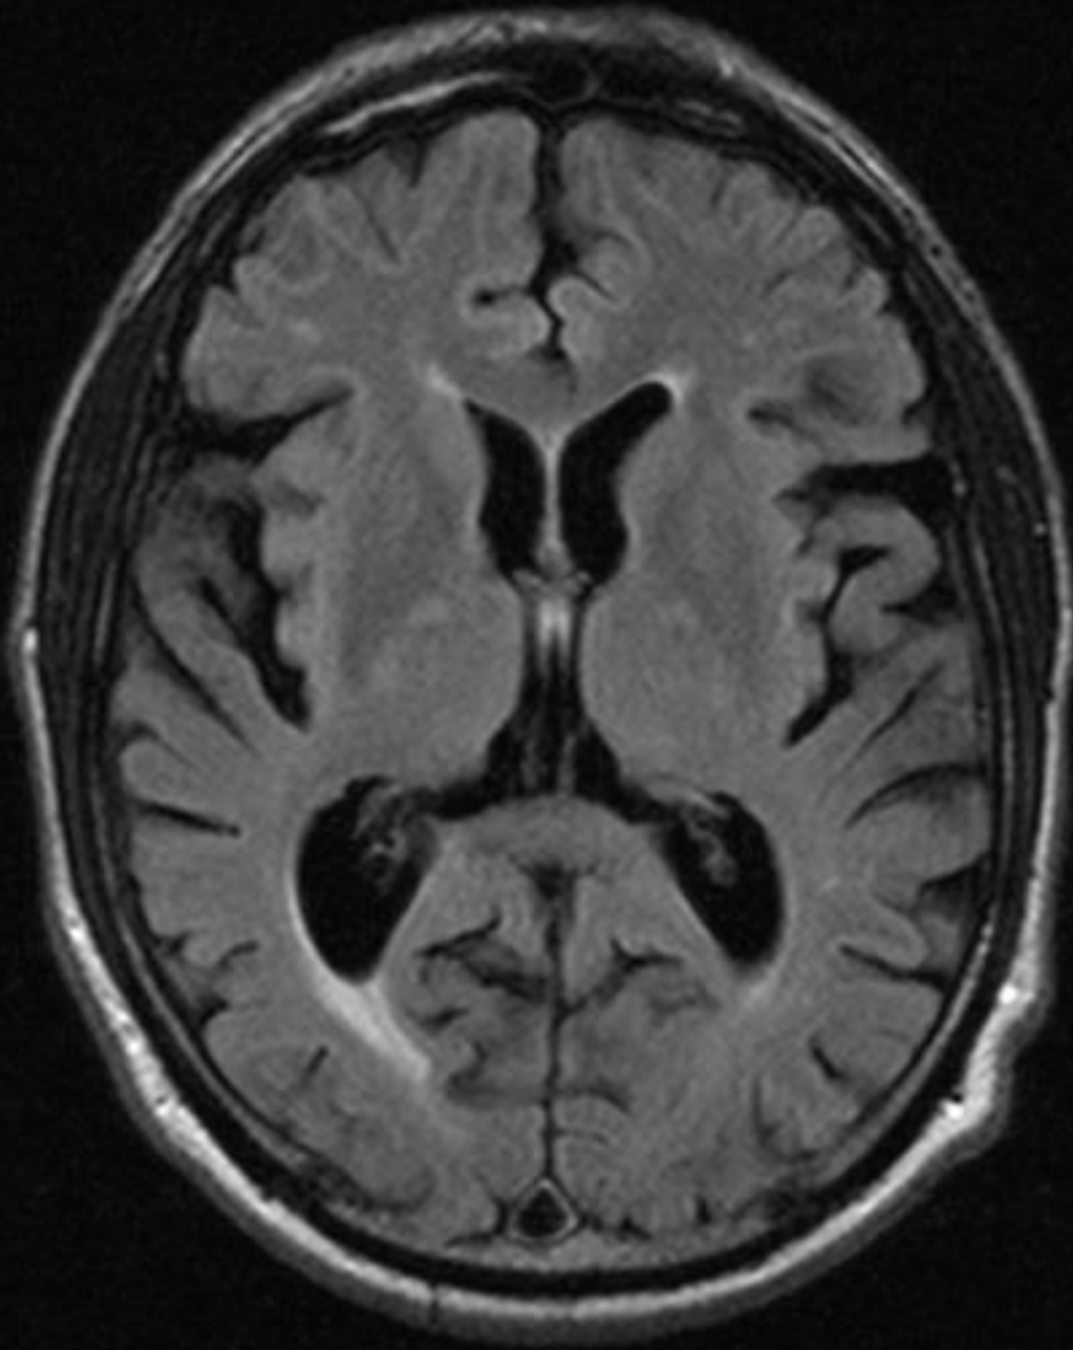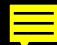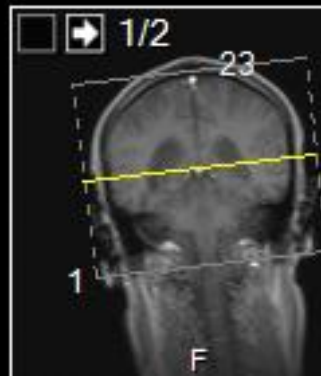

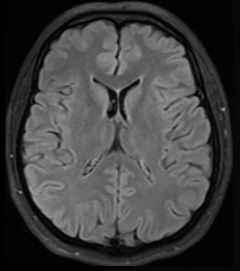

10

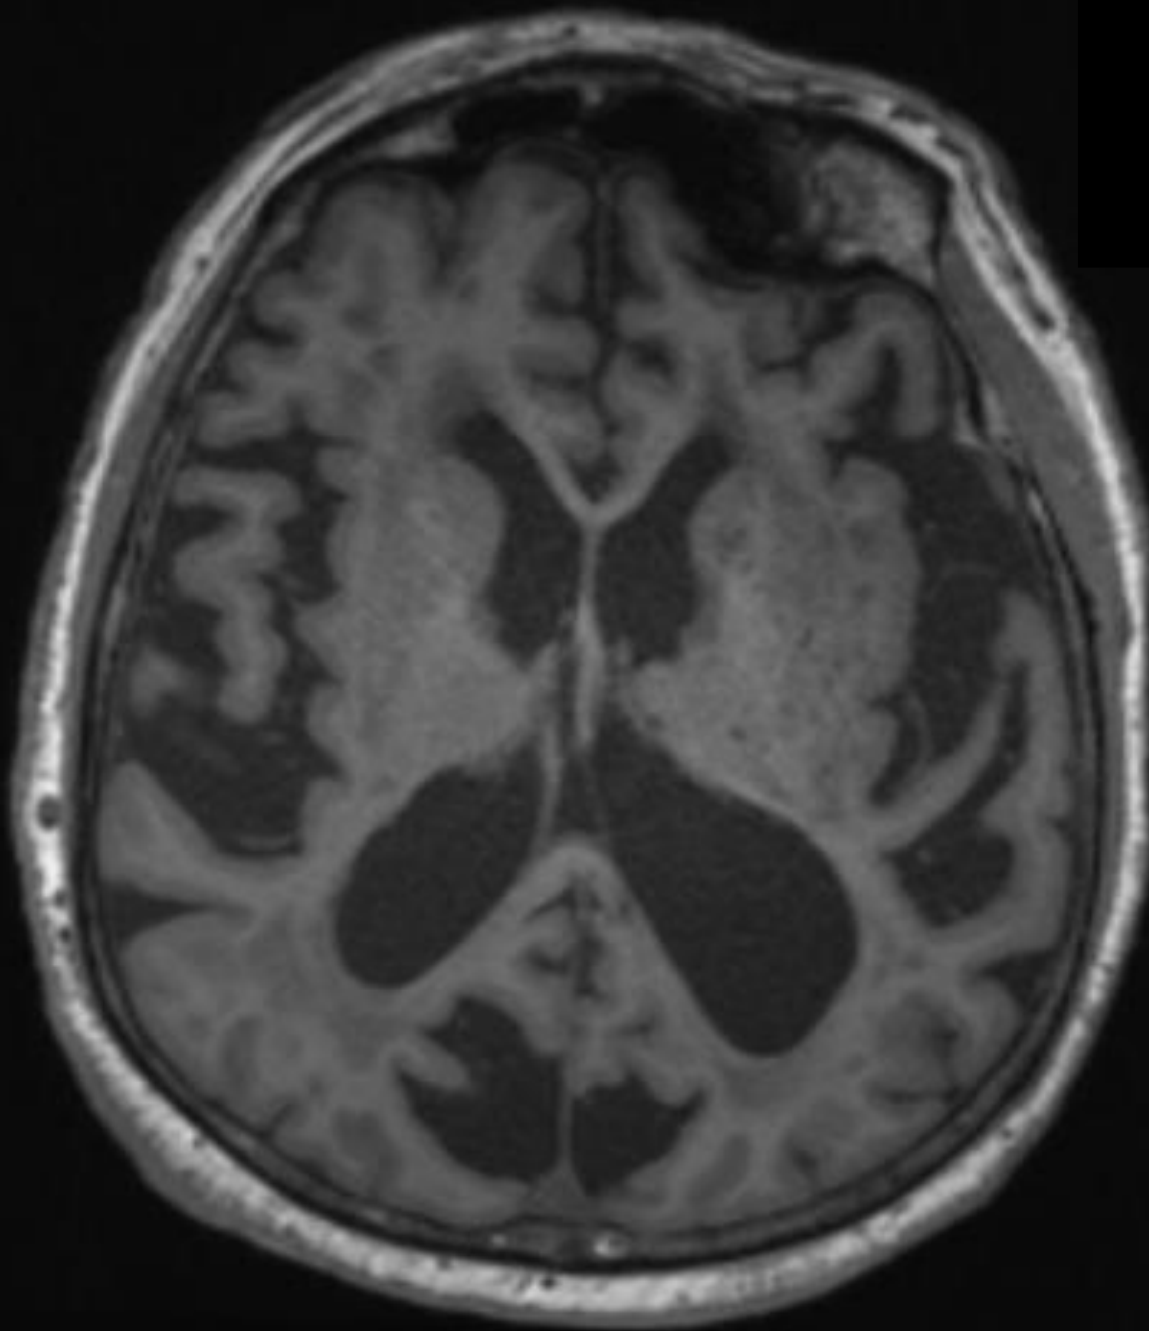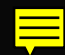



11

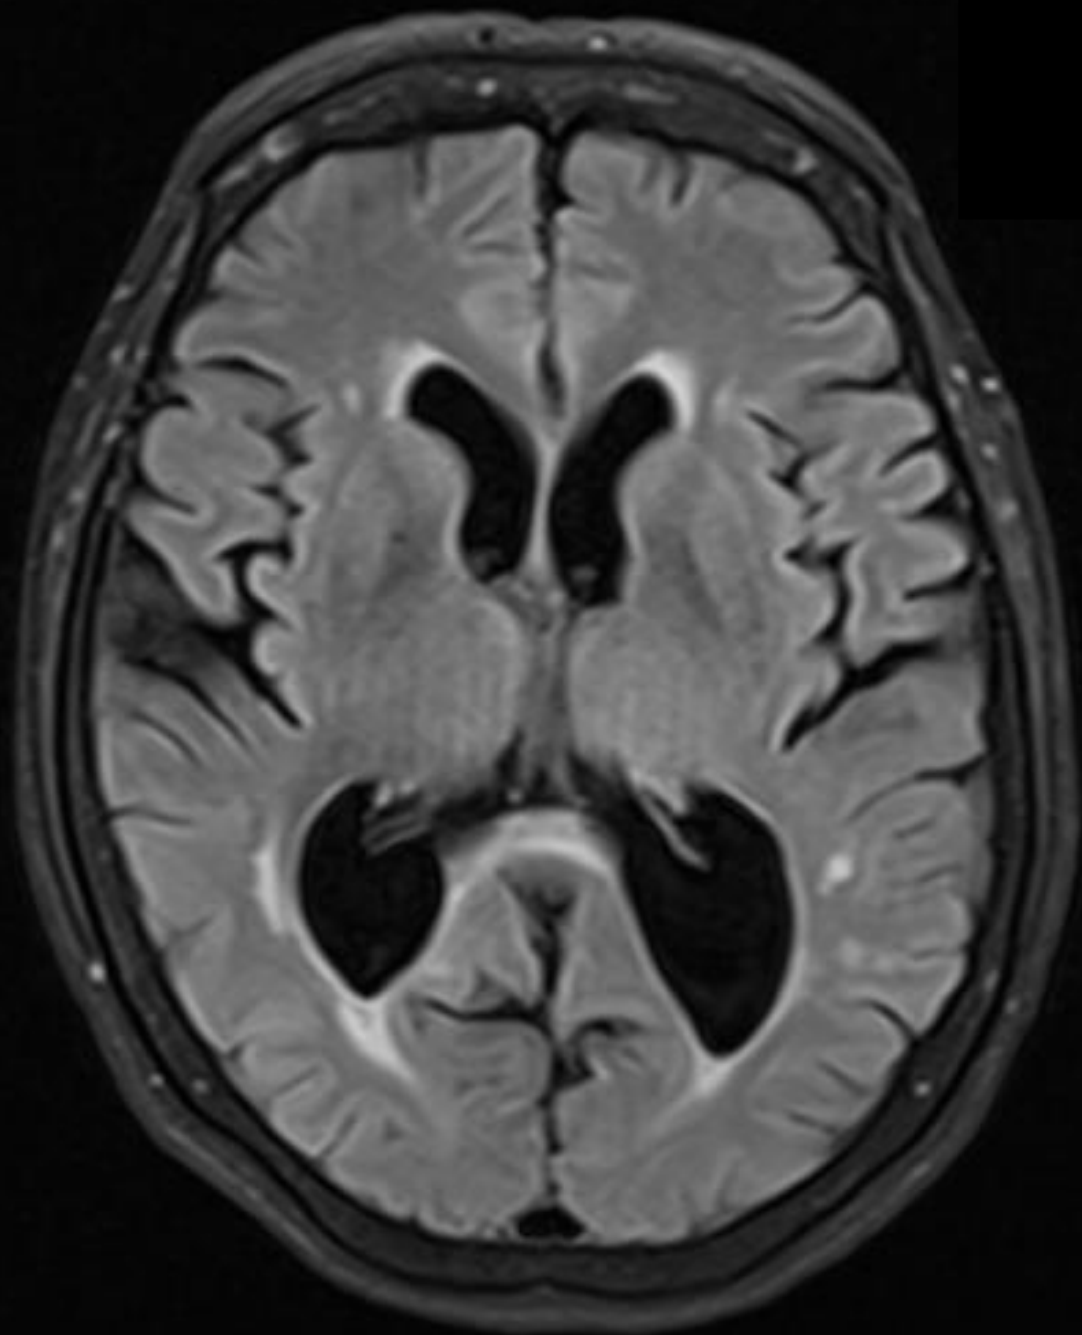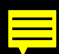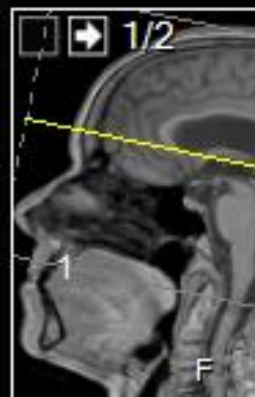

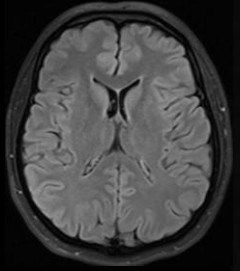

12

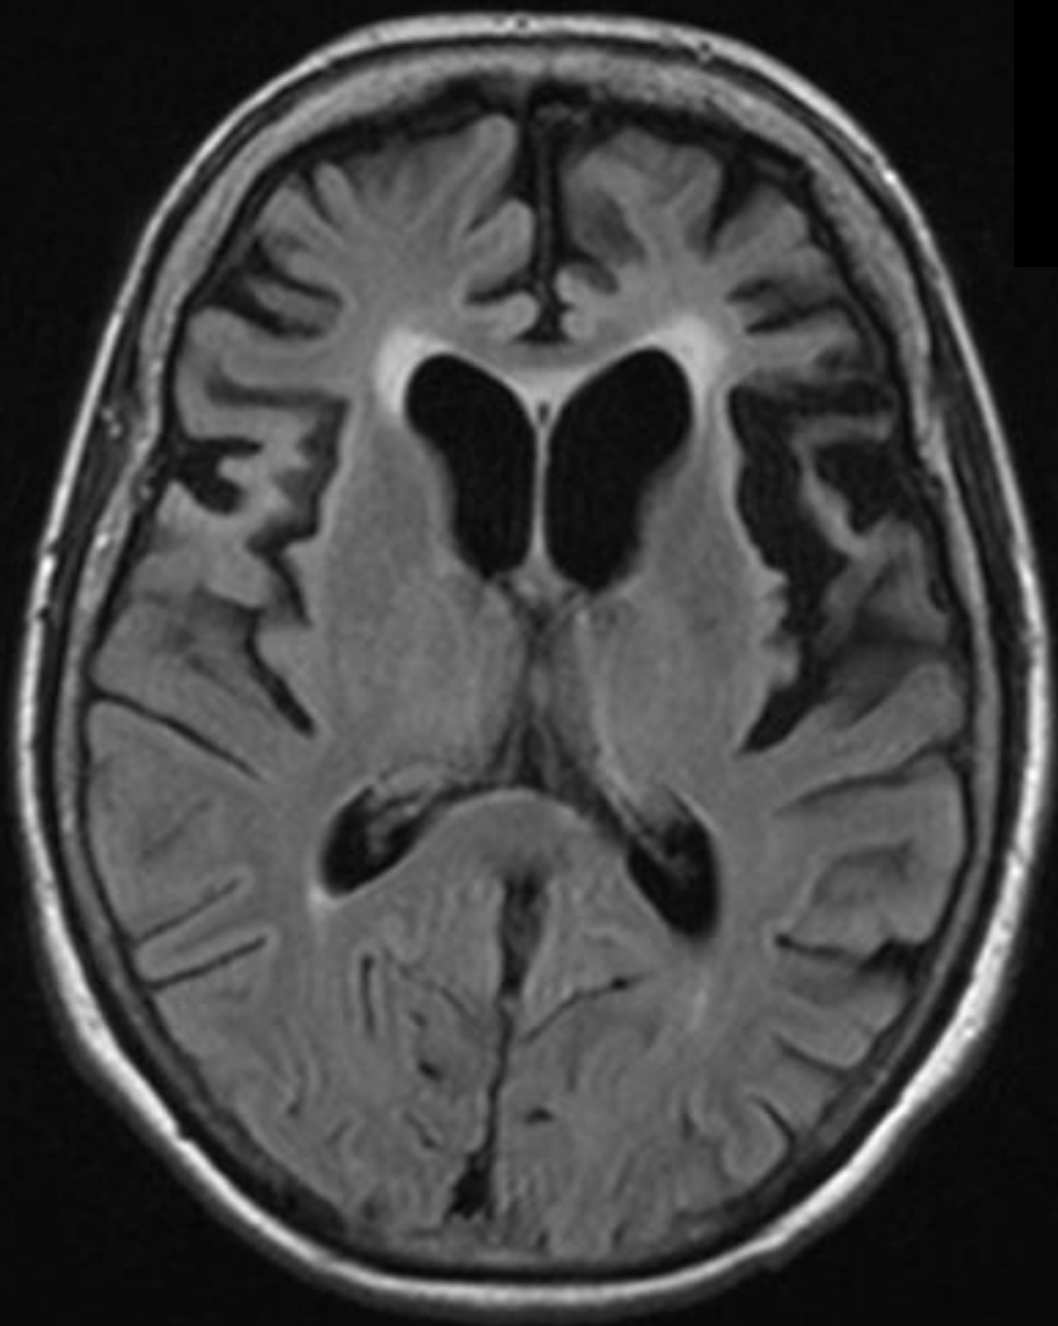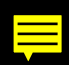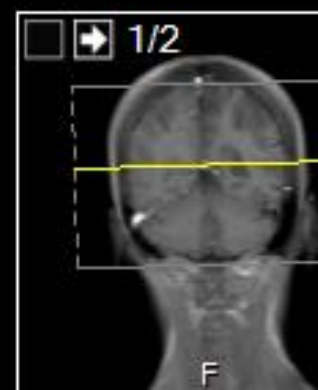

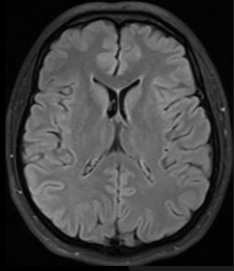

13

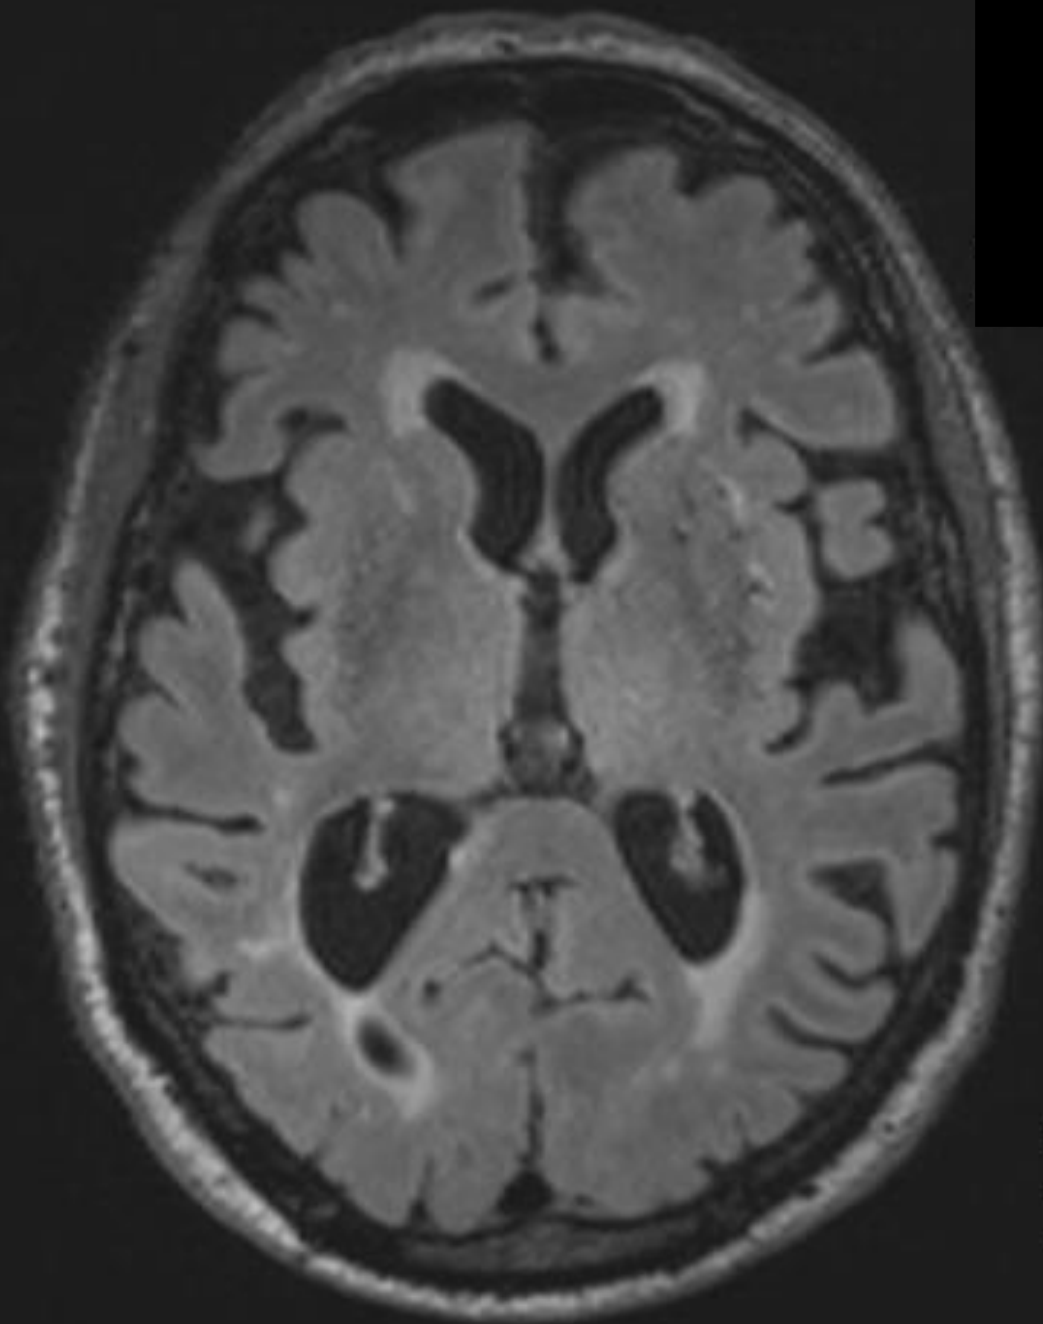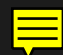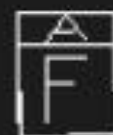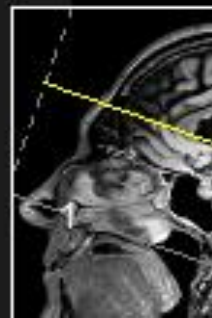

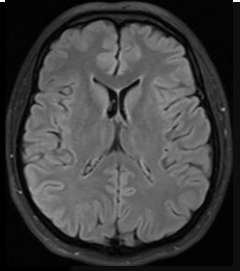

14

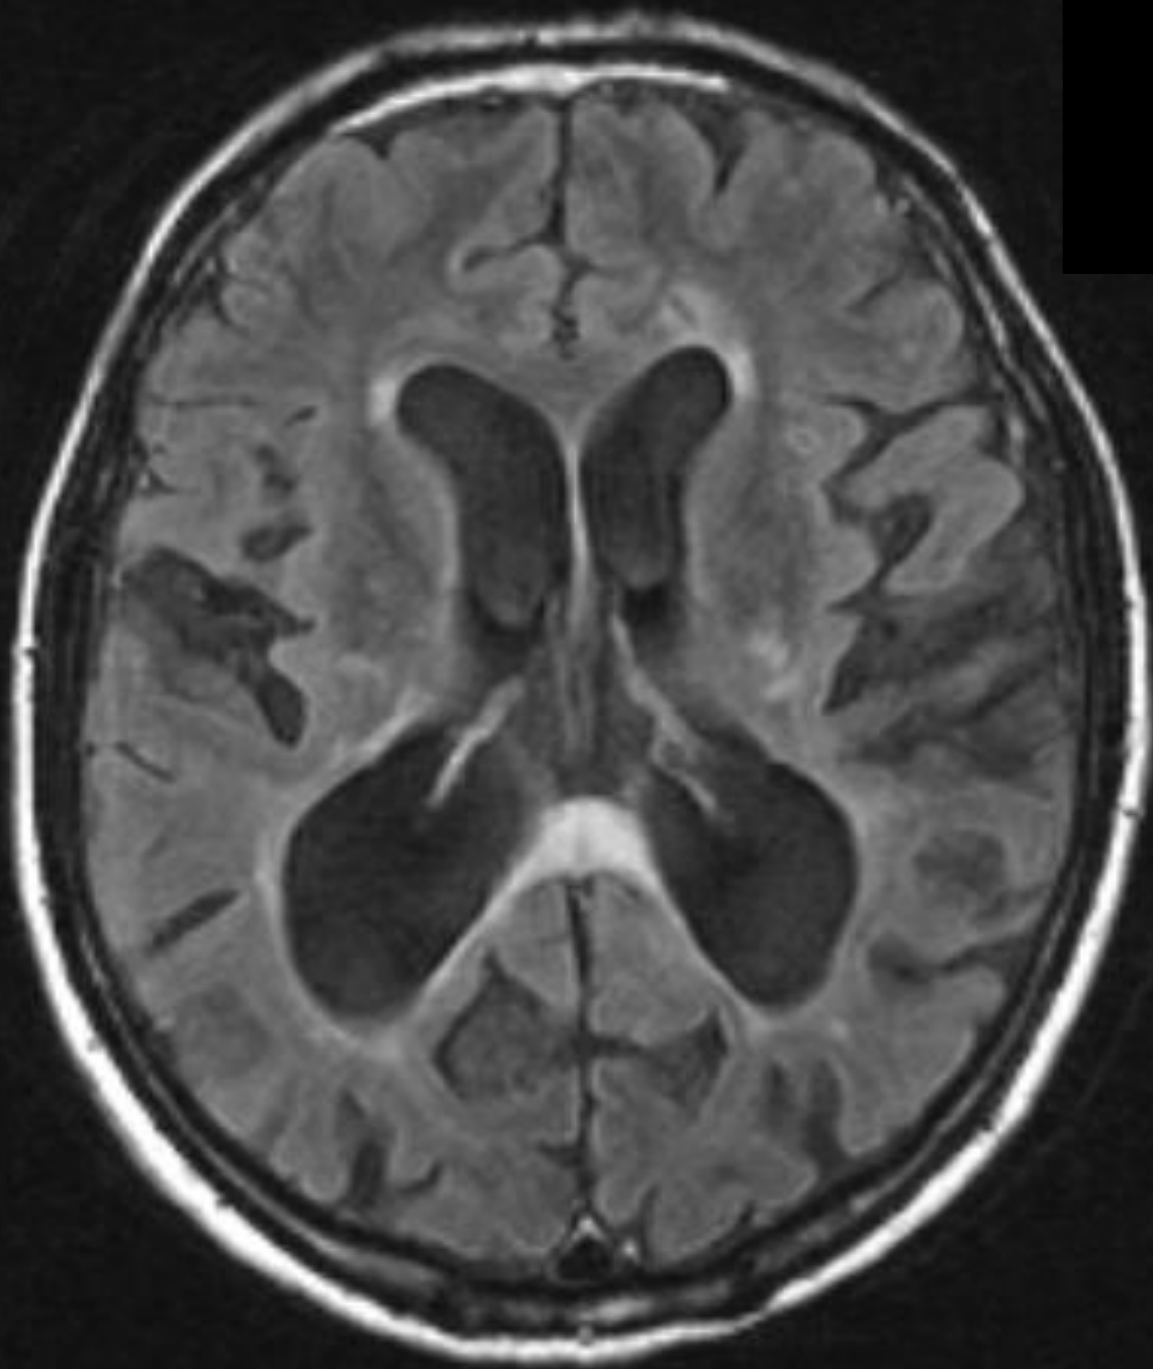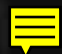

1/5

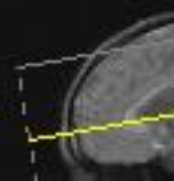

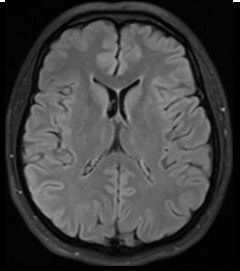

15

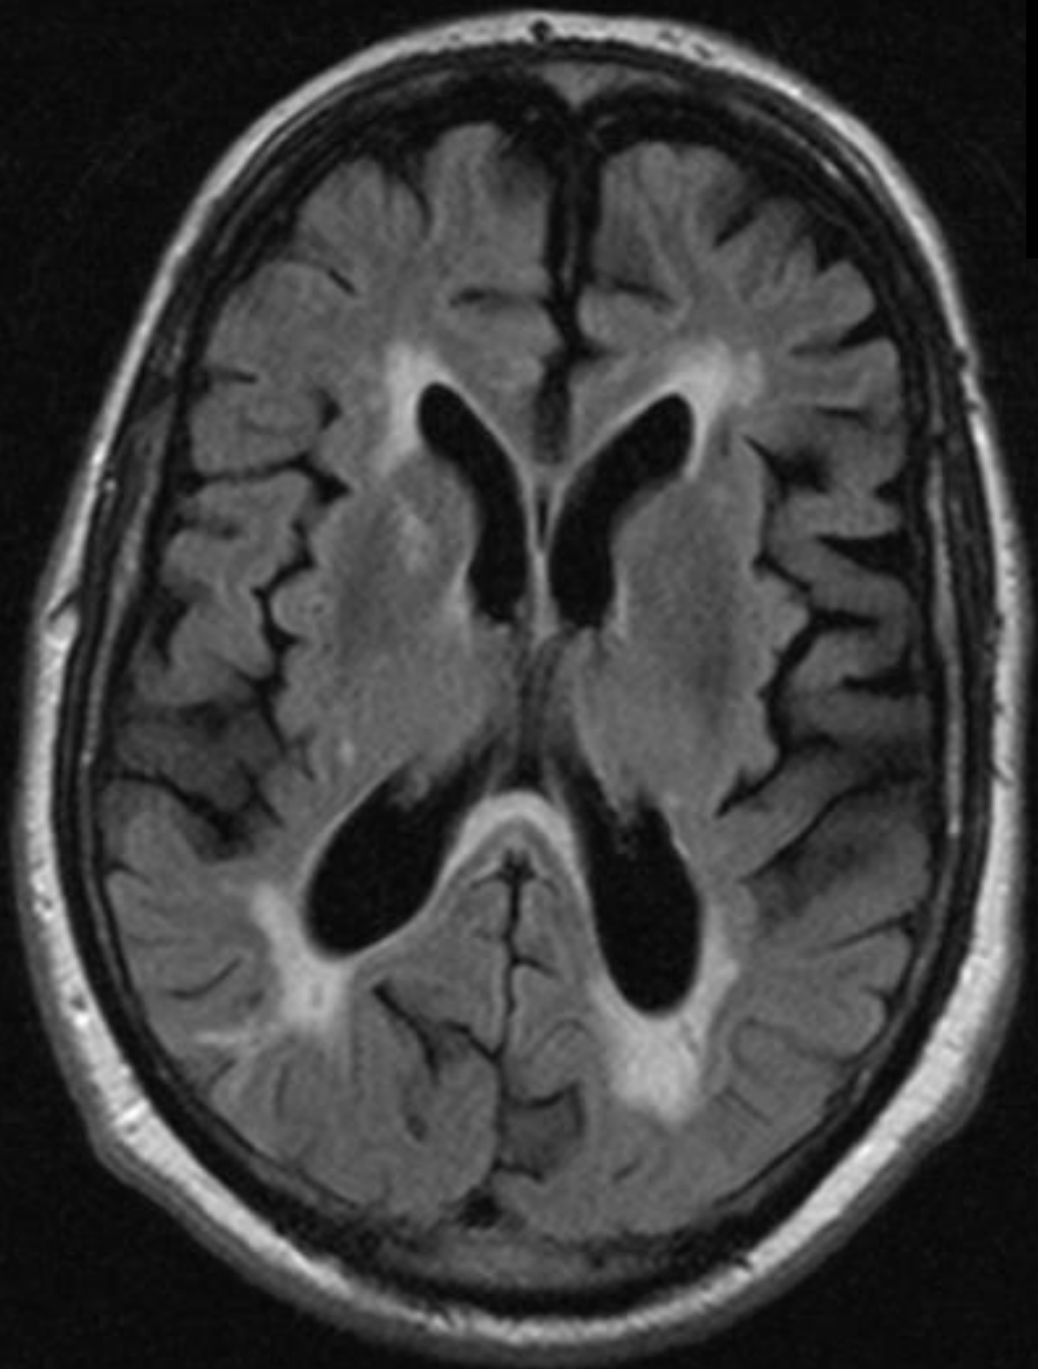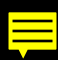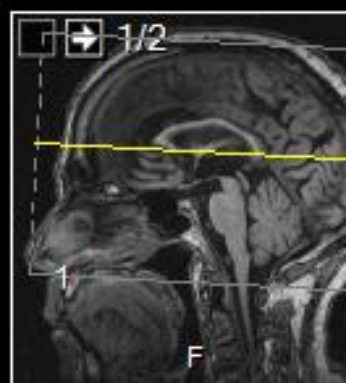



16

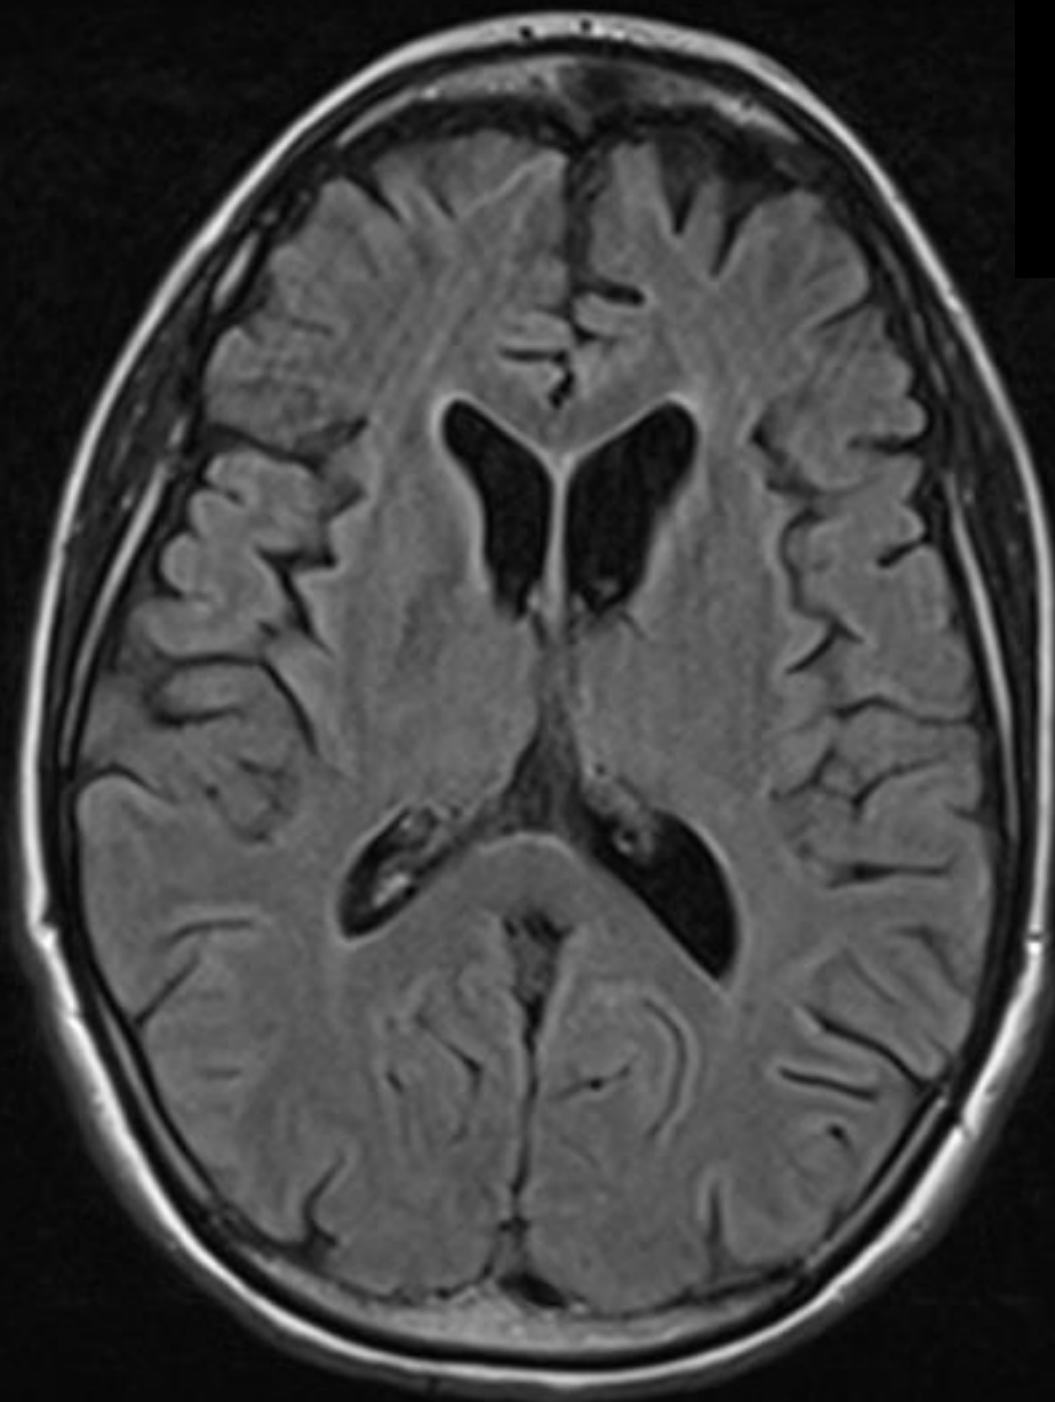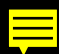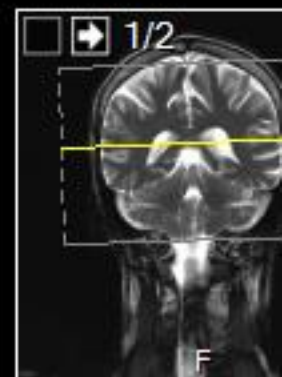





17

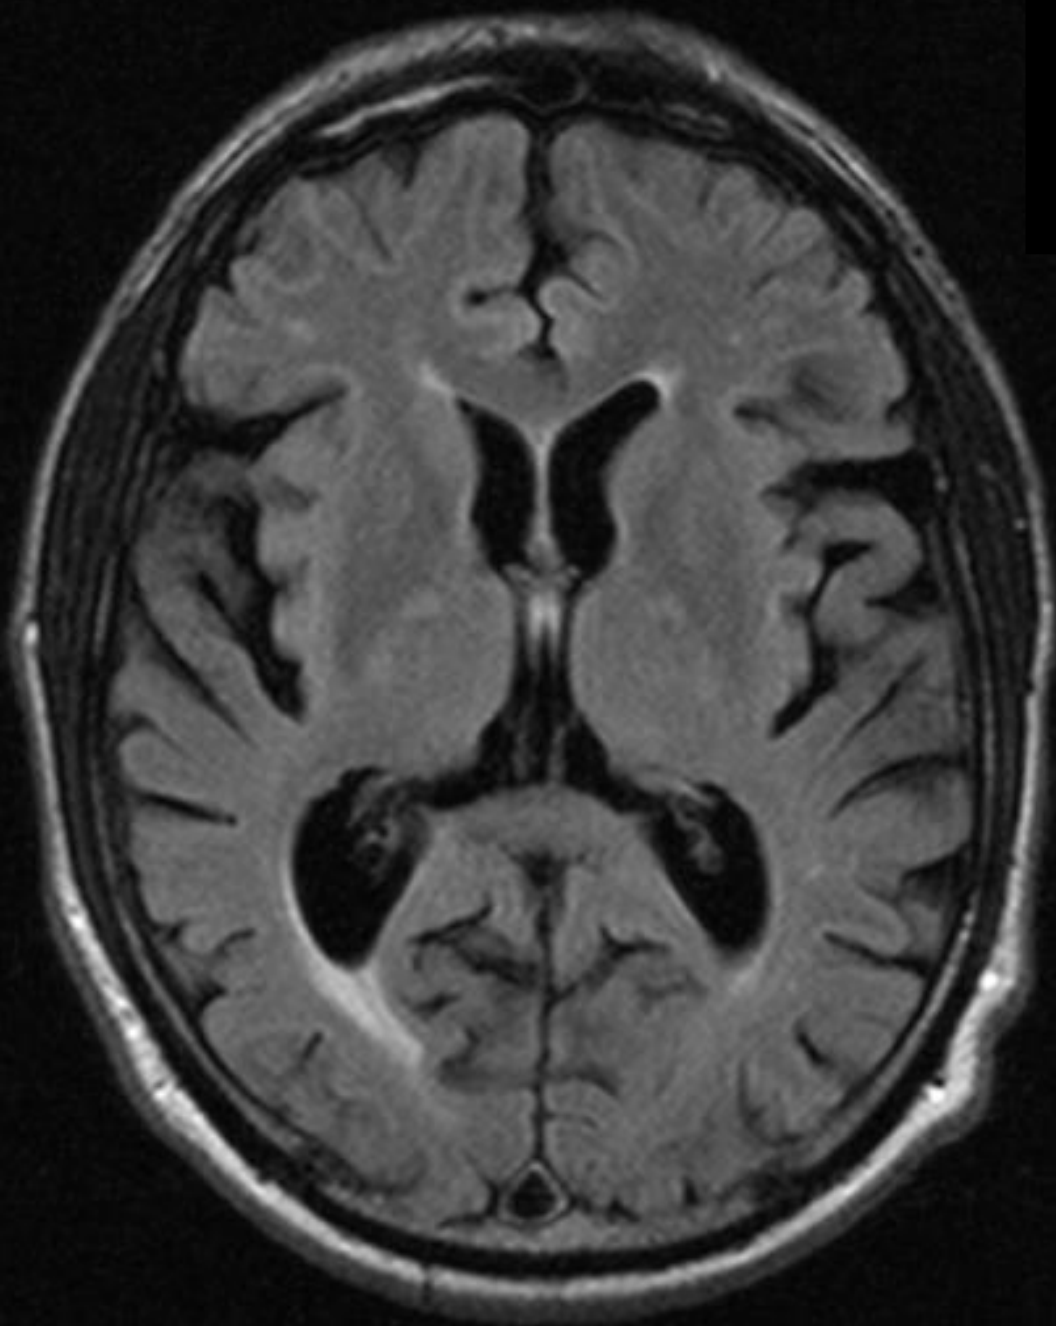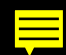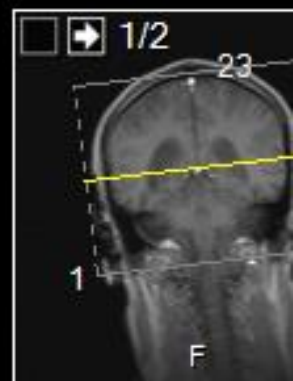



19

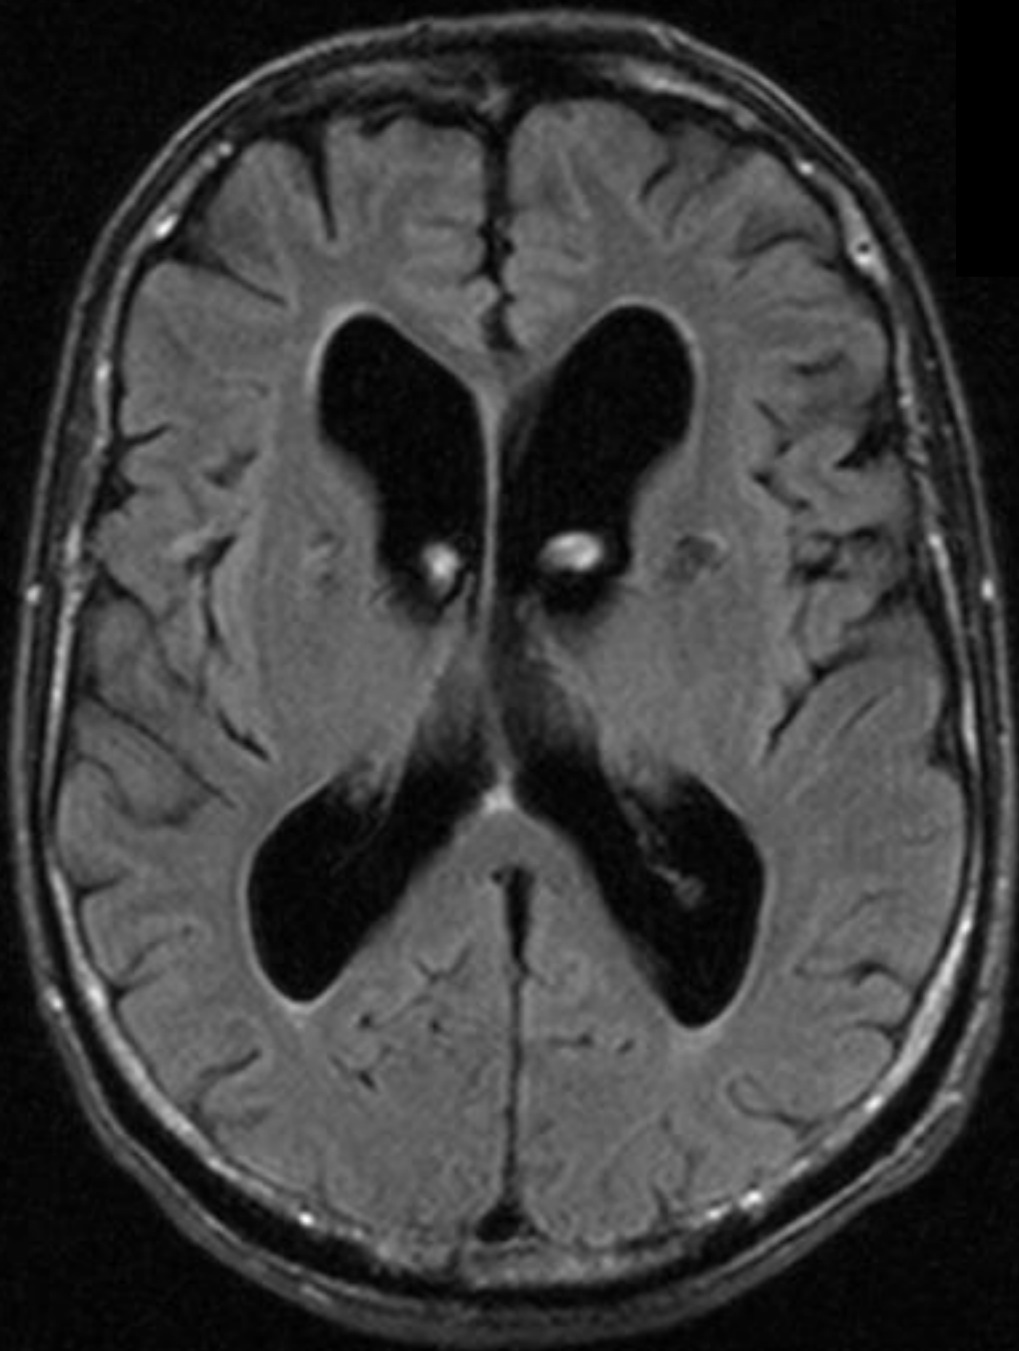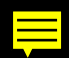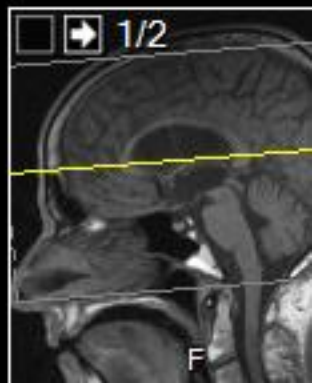

1/2



18

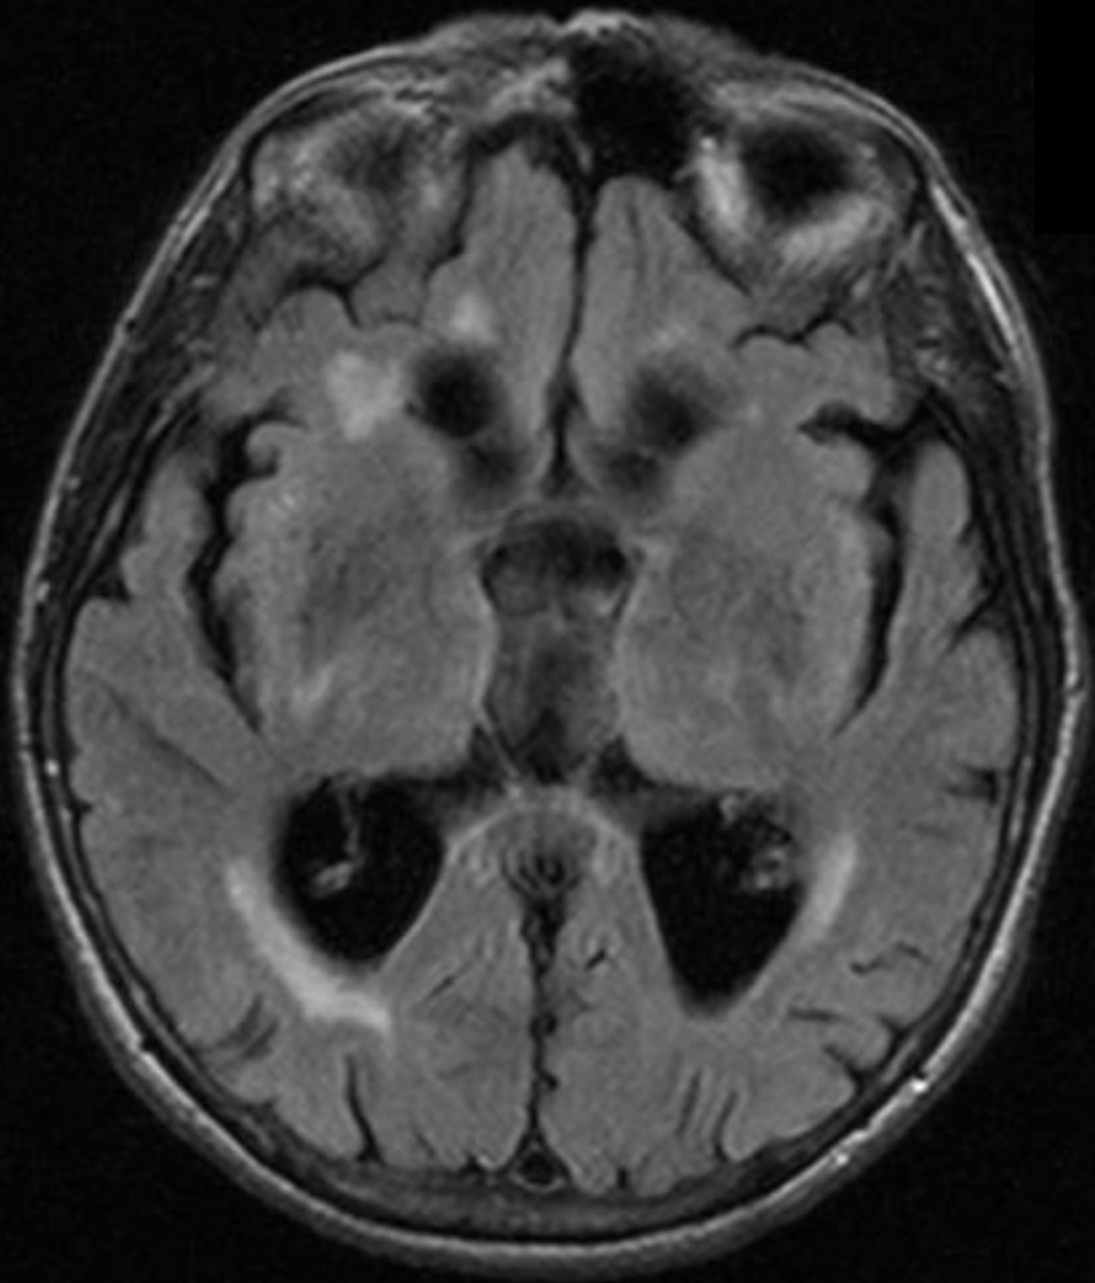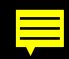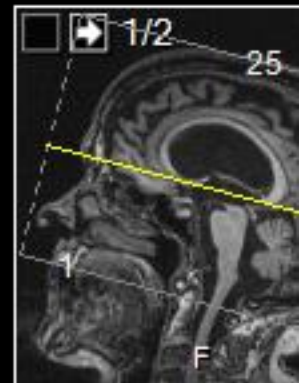



20

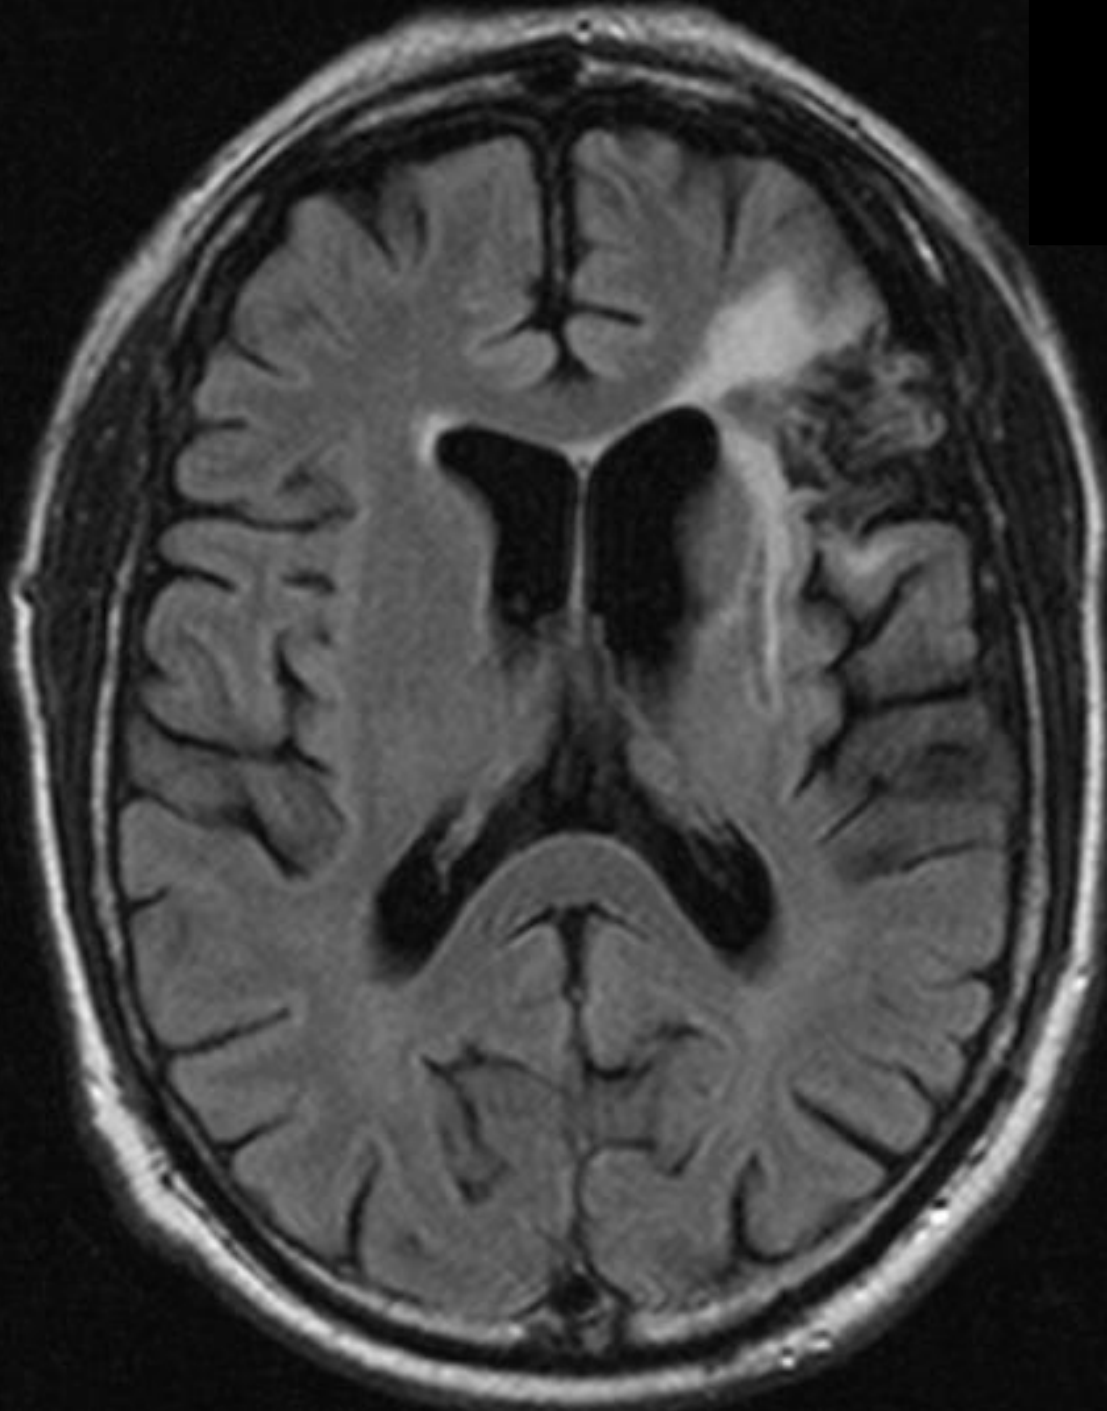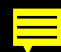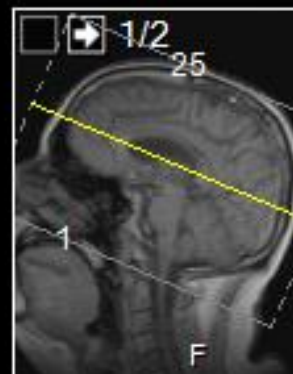

Supplement: 13244_2016_521_MOESM1_ESM.pdf [file 13244_2016_521_MOESM1_ESM.pdf]
