# Supplementary material for: Imaging biomarkers of dementia: recommended visual rating scales with teaching cases
Source: PubMed Central journal article supplement (PMC5265189; doi:10.1007/s13244-016-0521-6), 2016-12-21

Healthy, 25 years of age

1

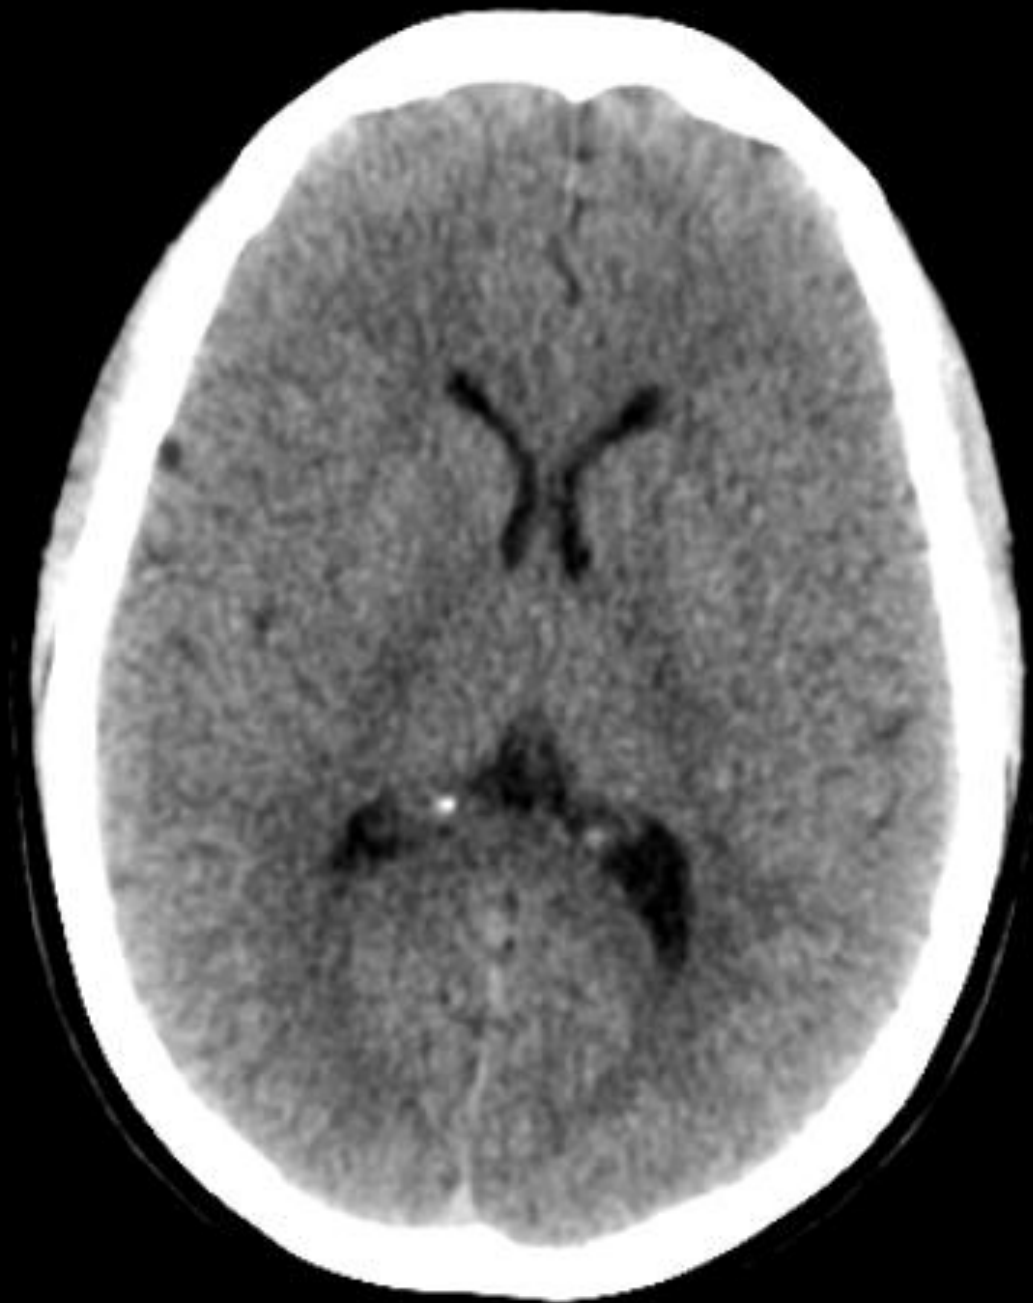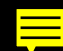

1/10

73

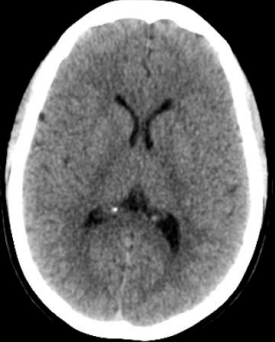

2

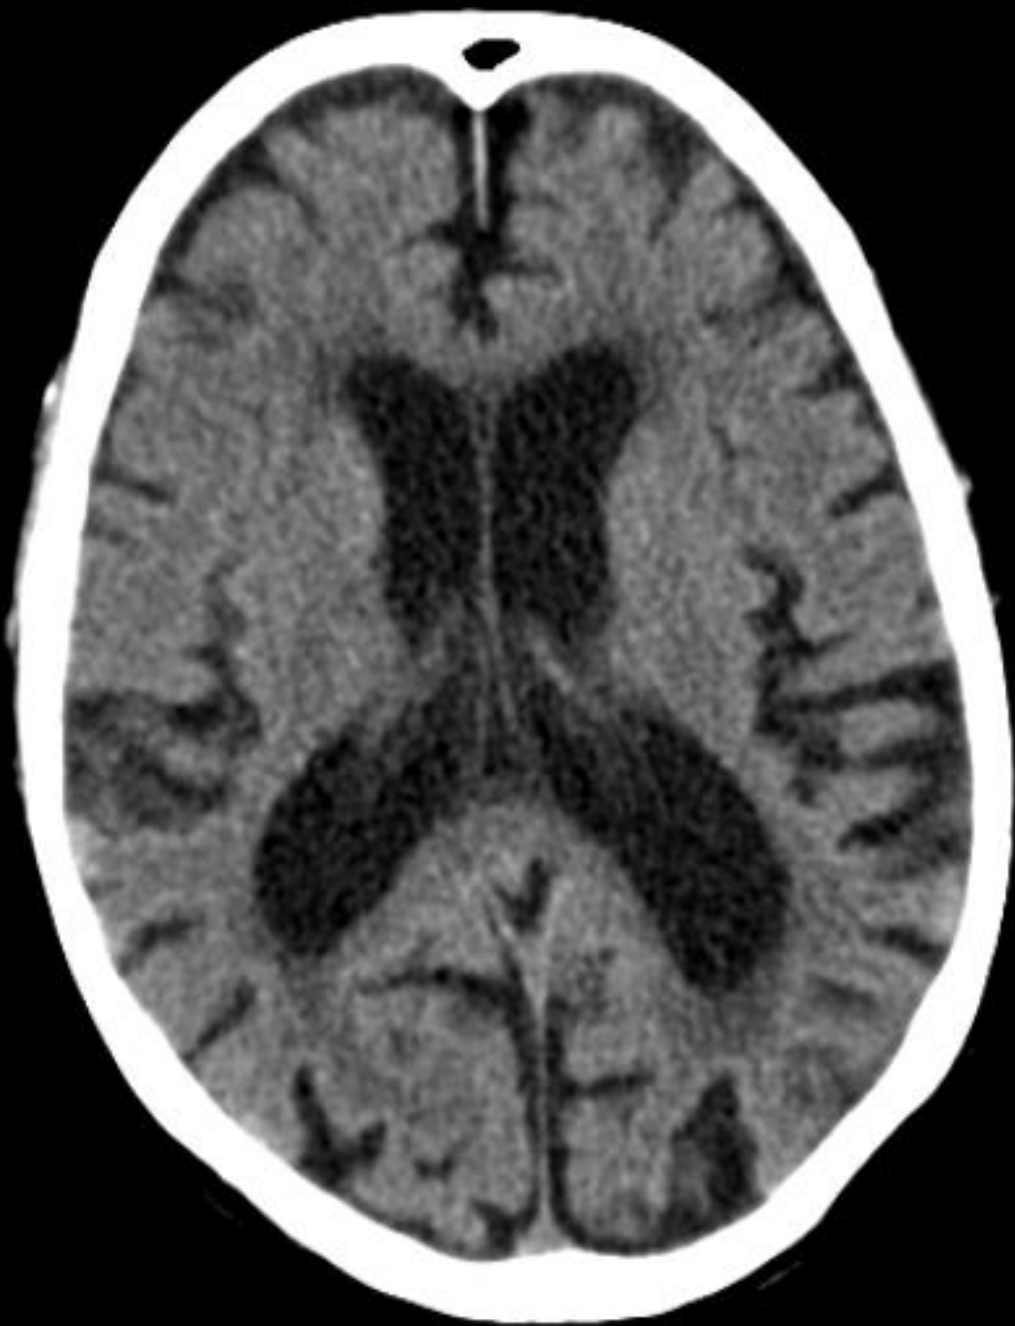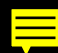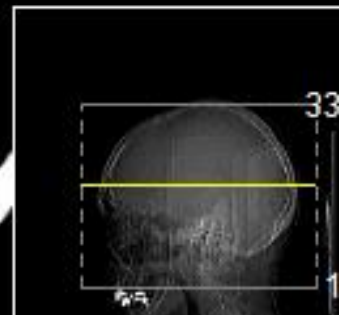

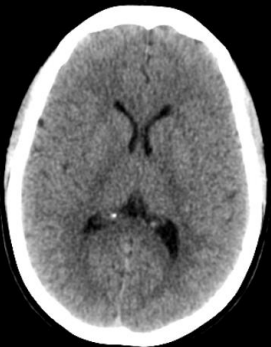

3

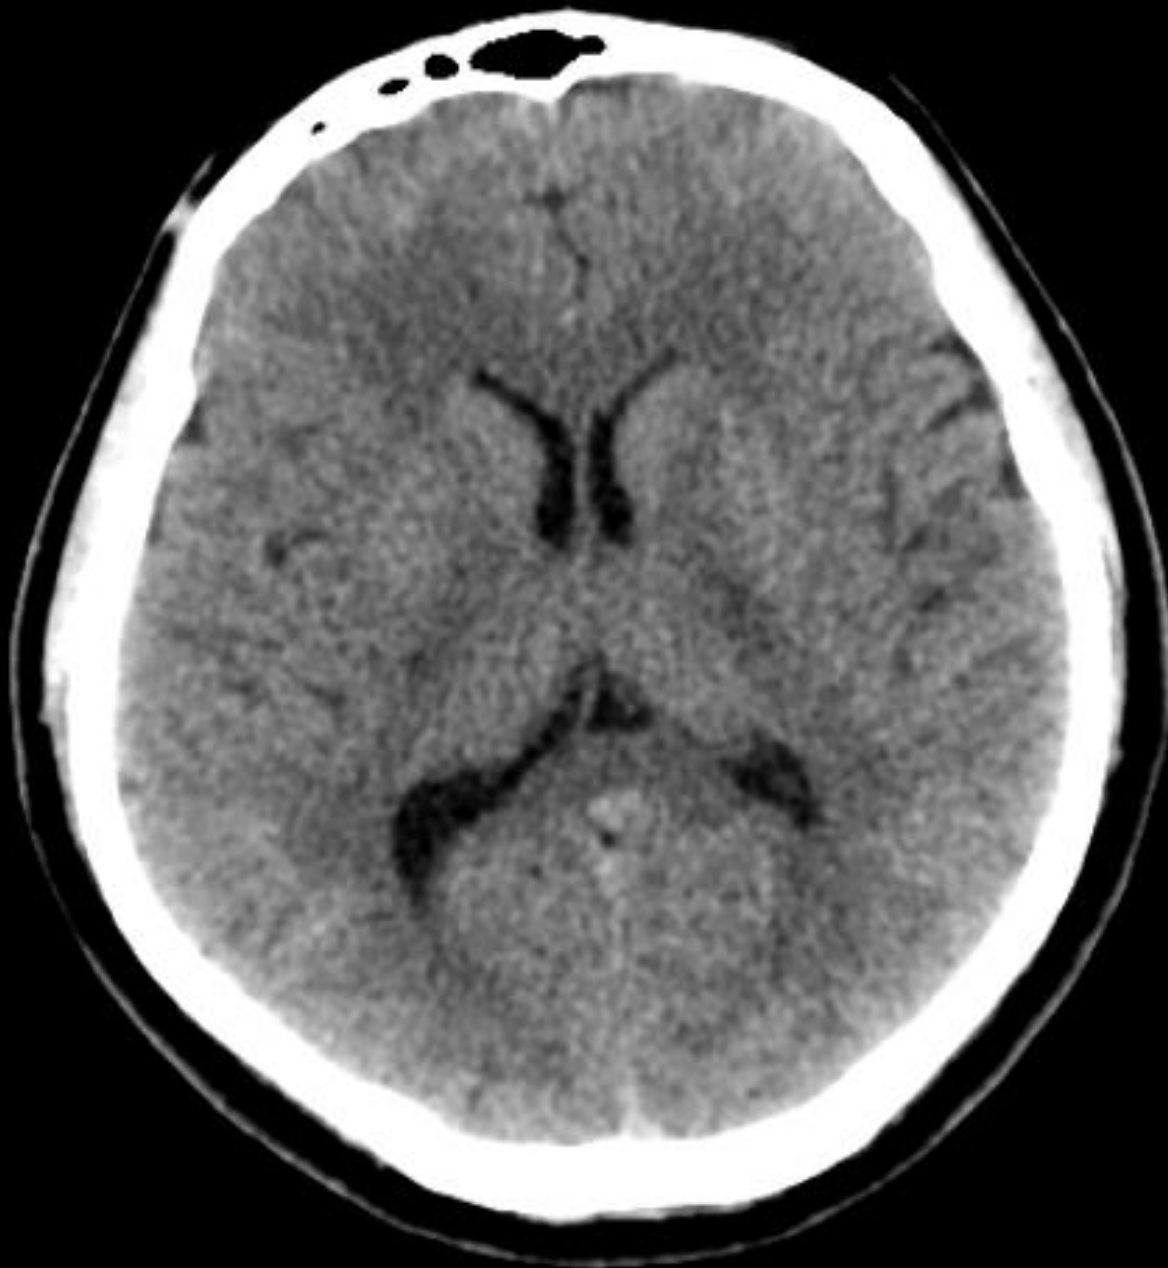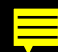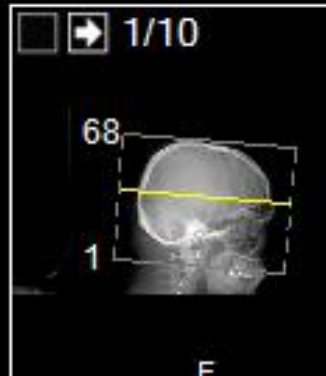

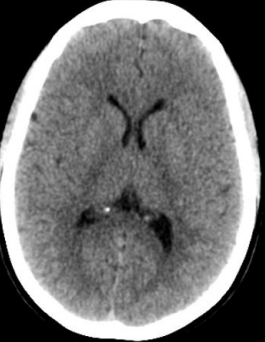

4

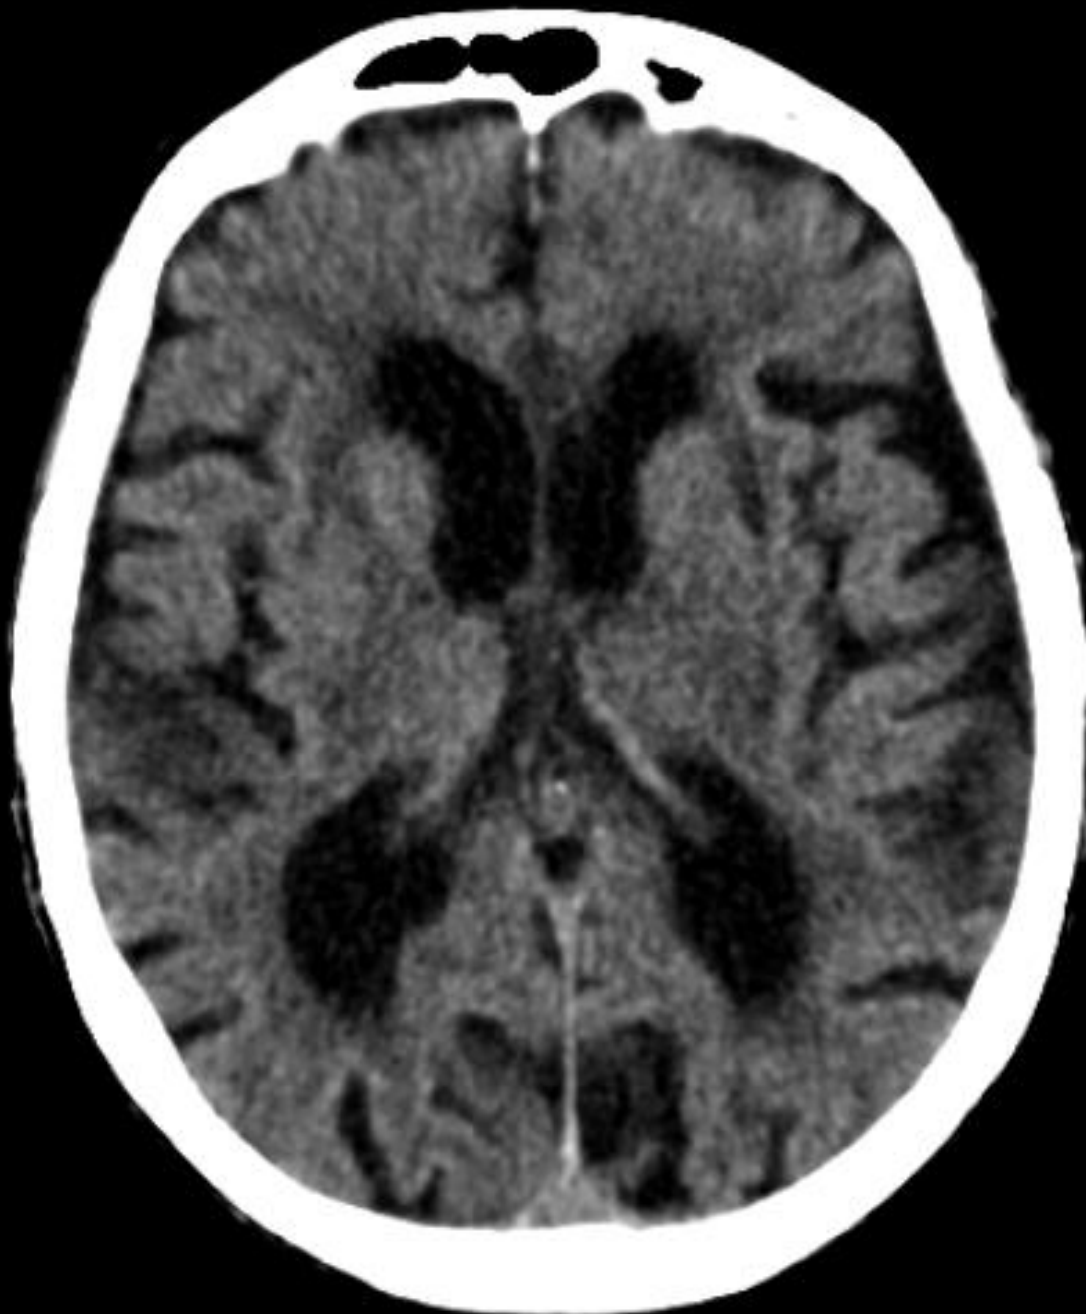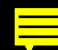

1/10

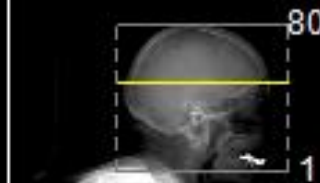

F

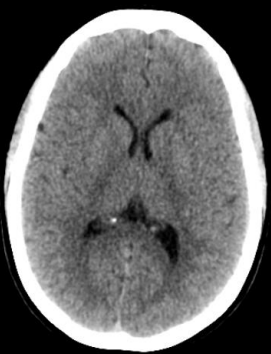

5

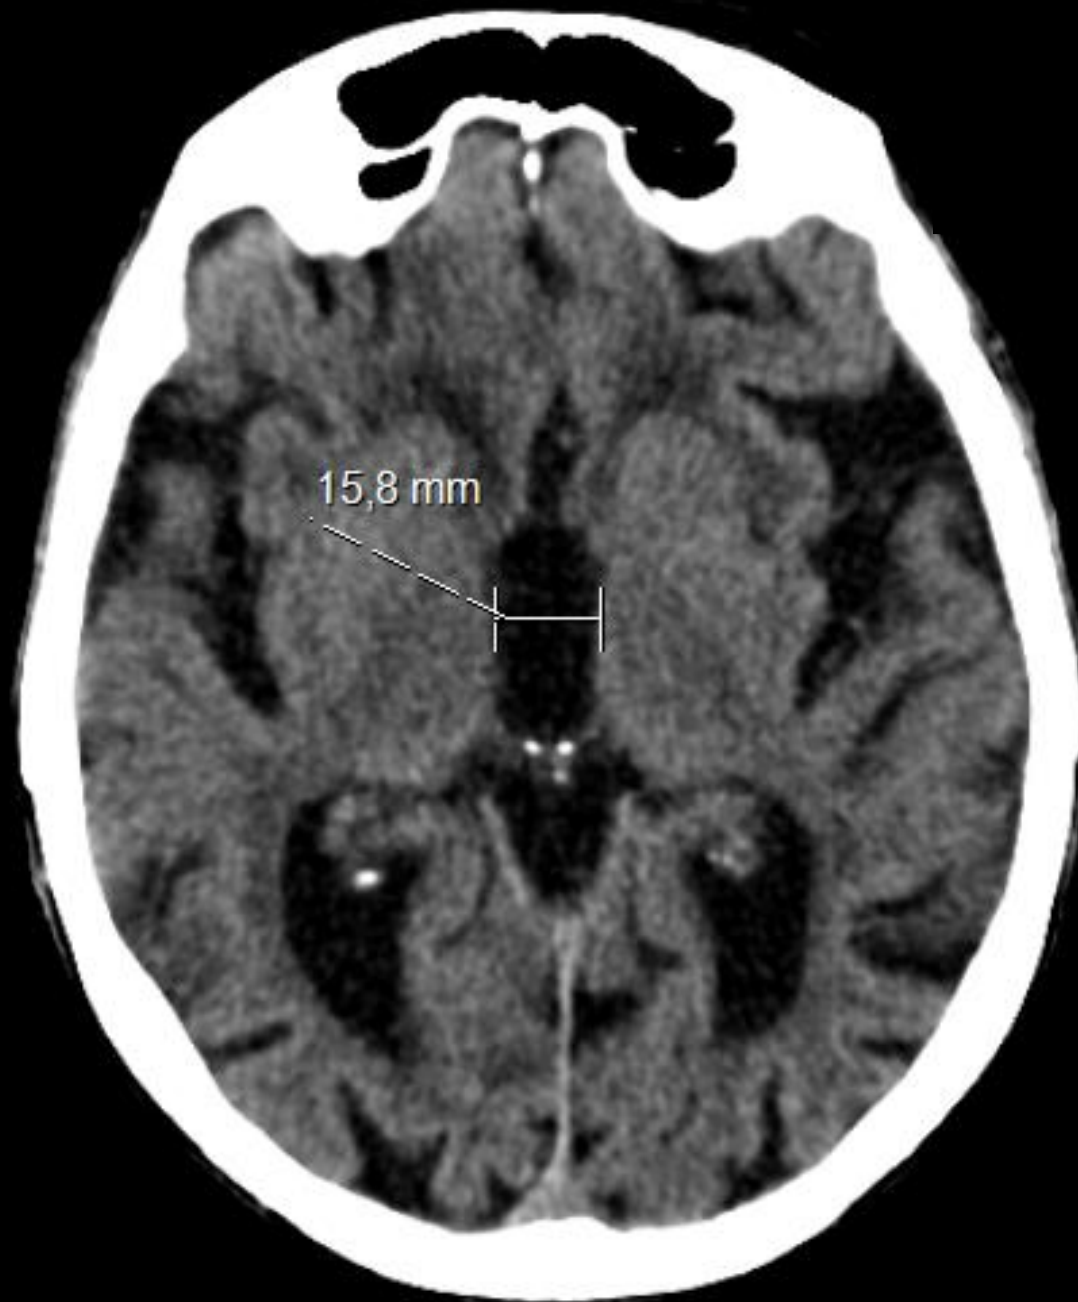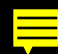

1/10

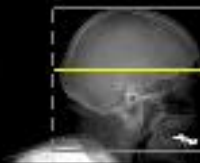

F

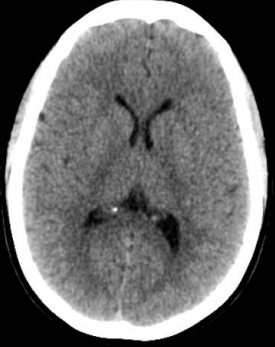

6

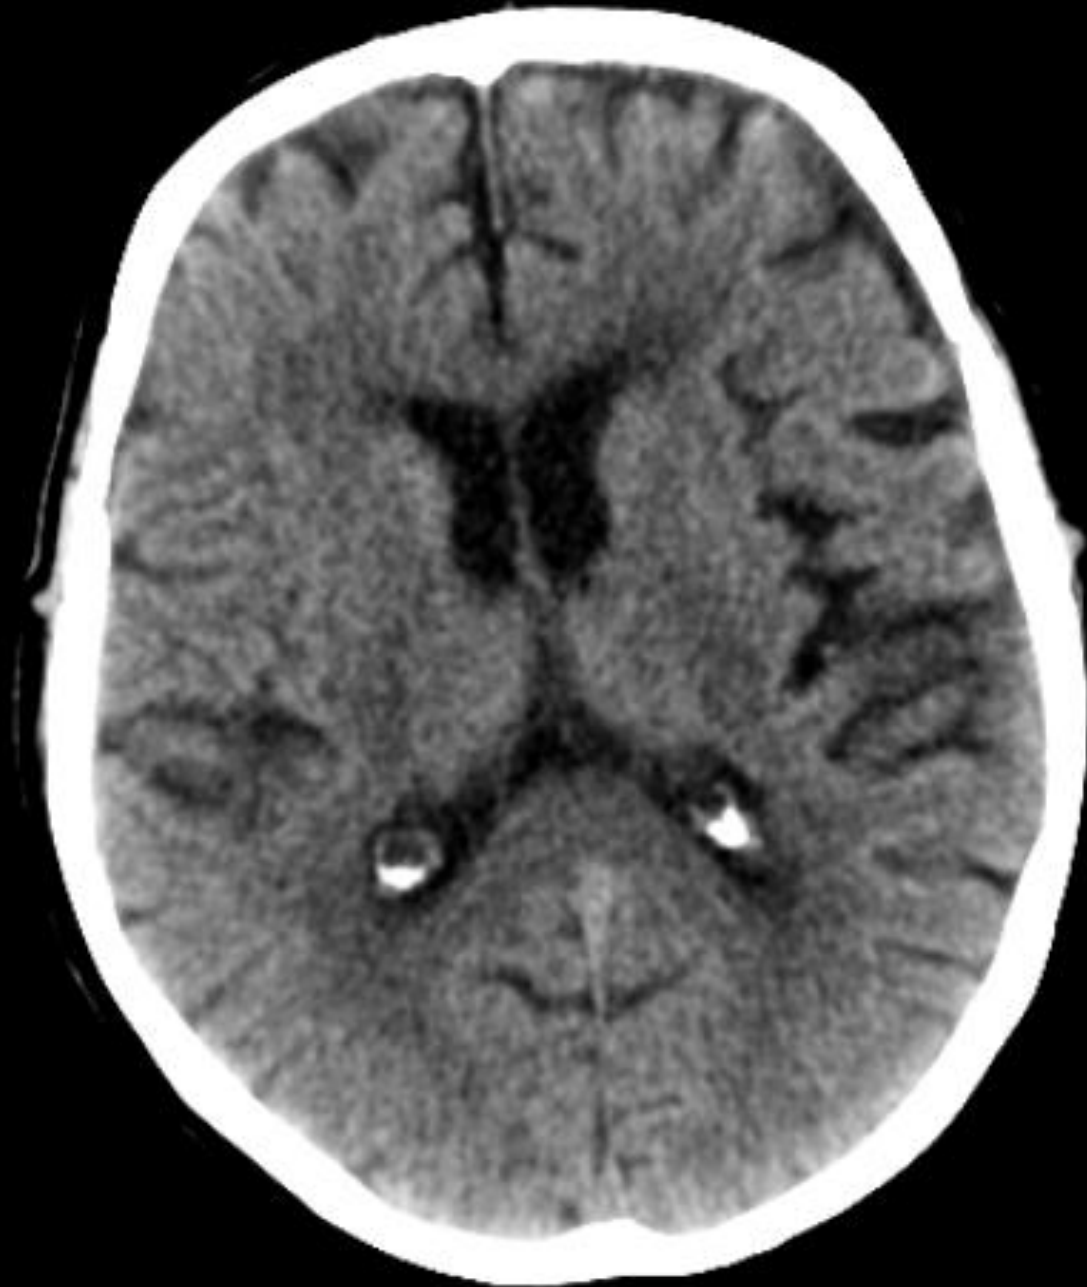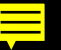

1/5

72

1

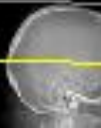



7

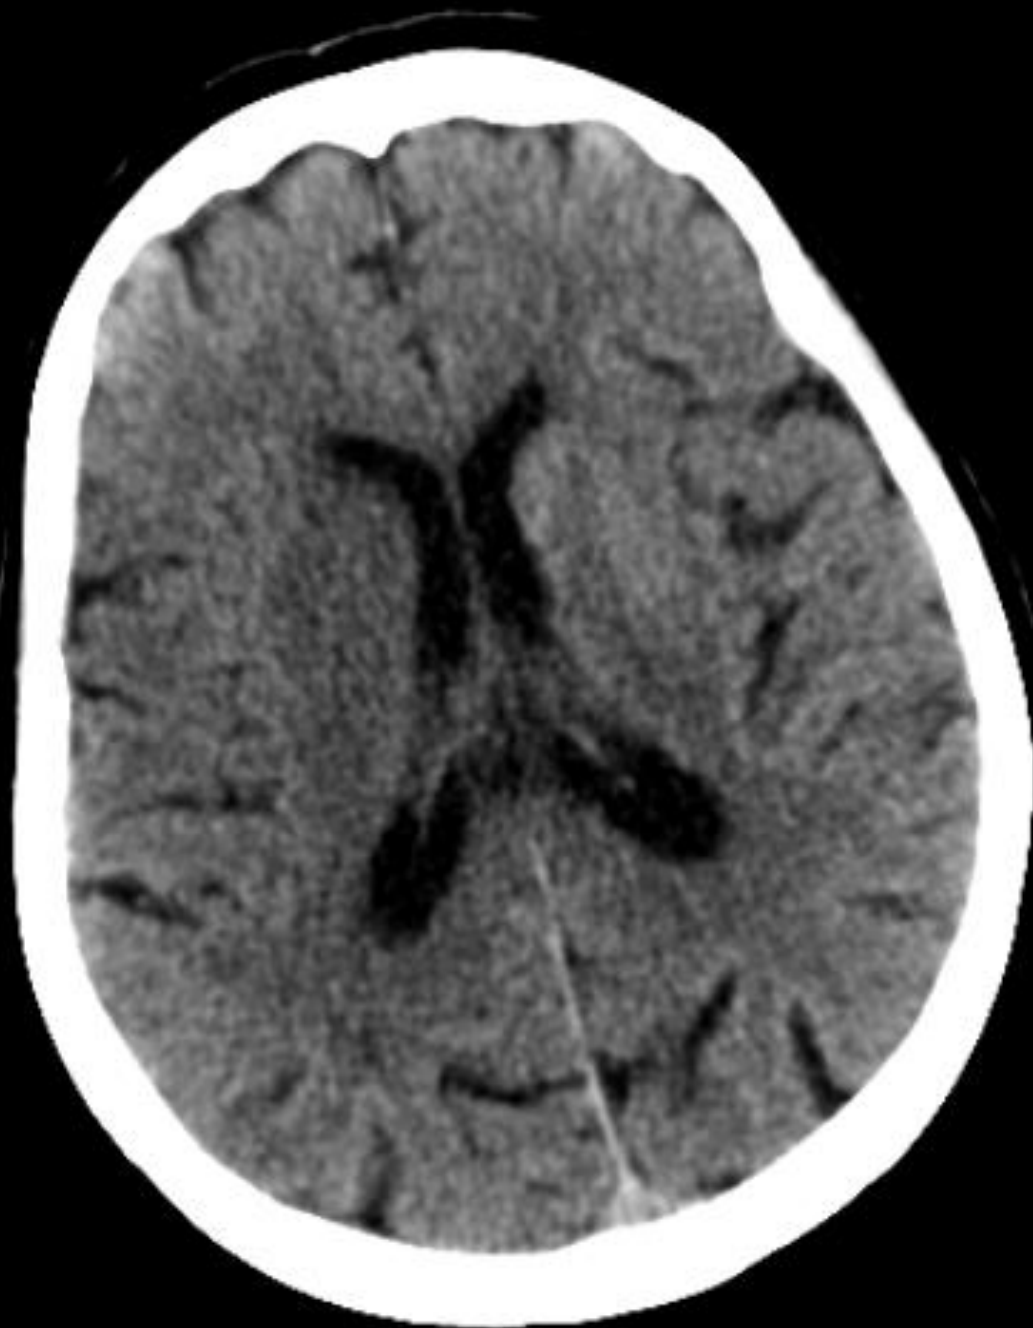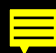

1/10

83

1

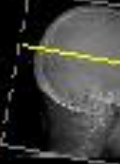

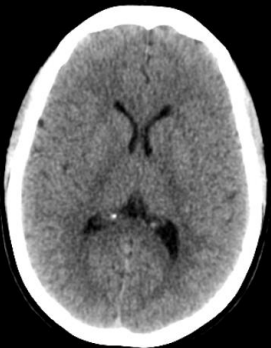

8

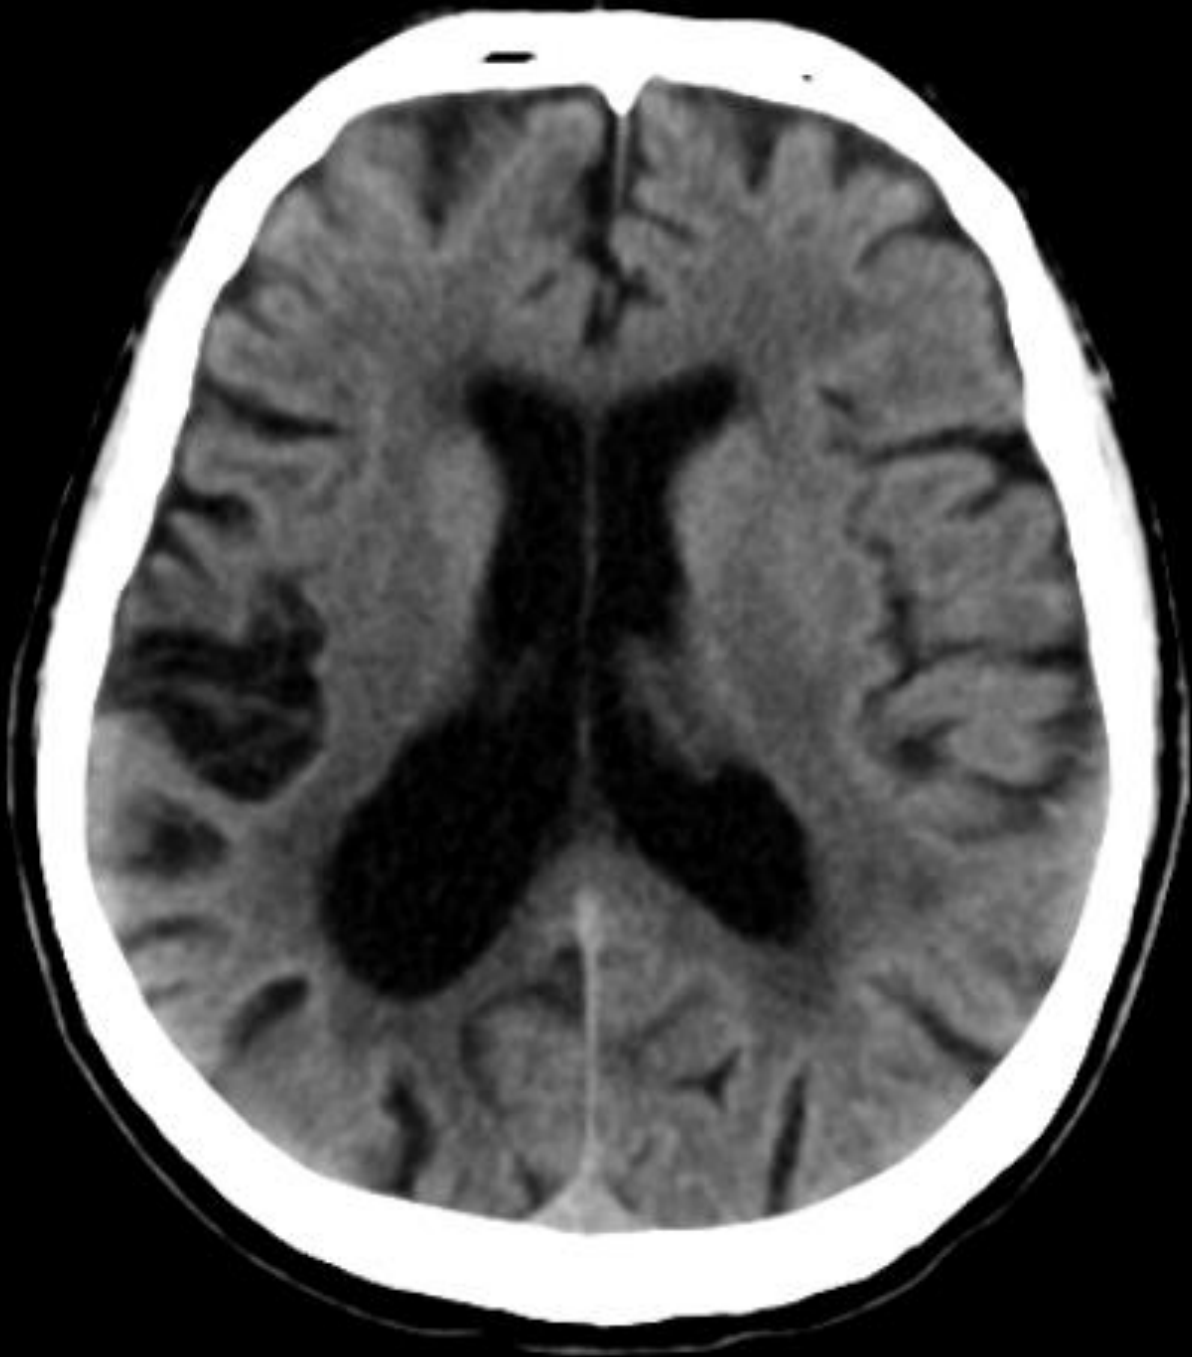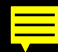

1/8

1

67





9

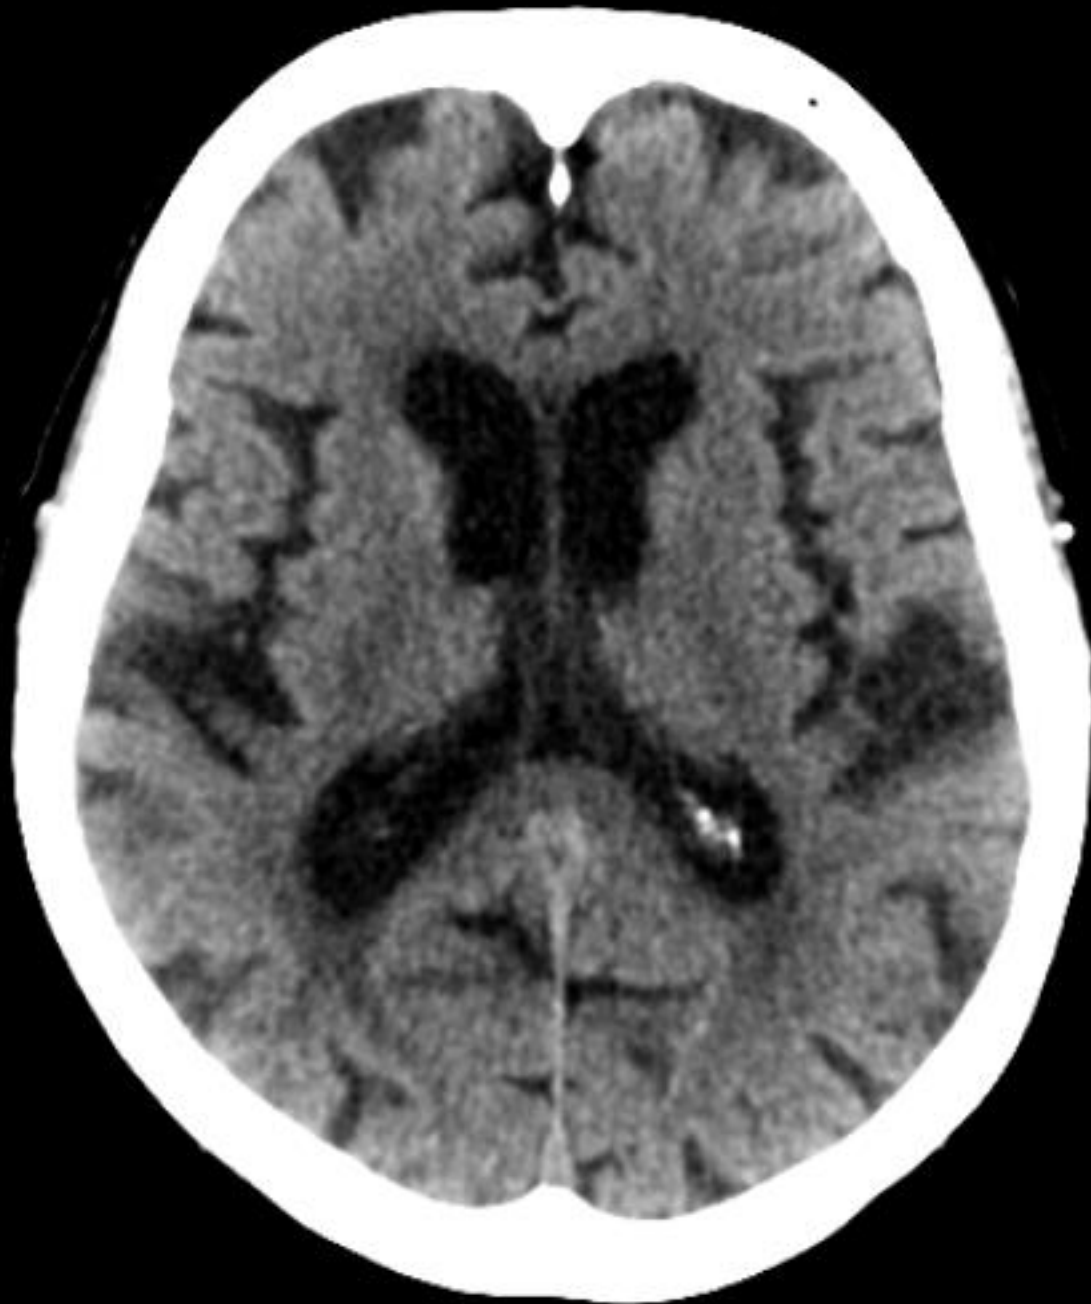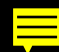

1/6

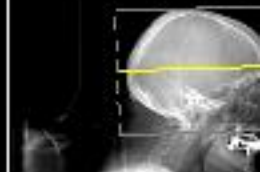

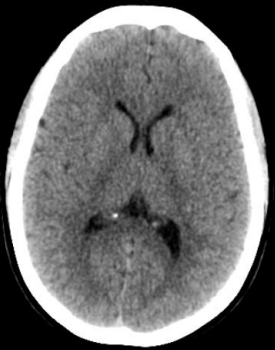

10

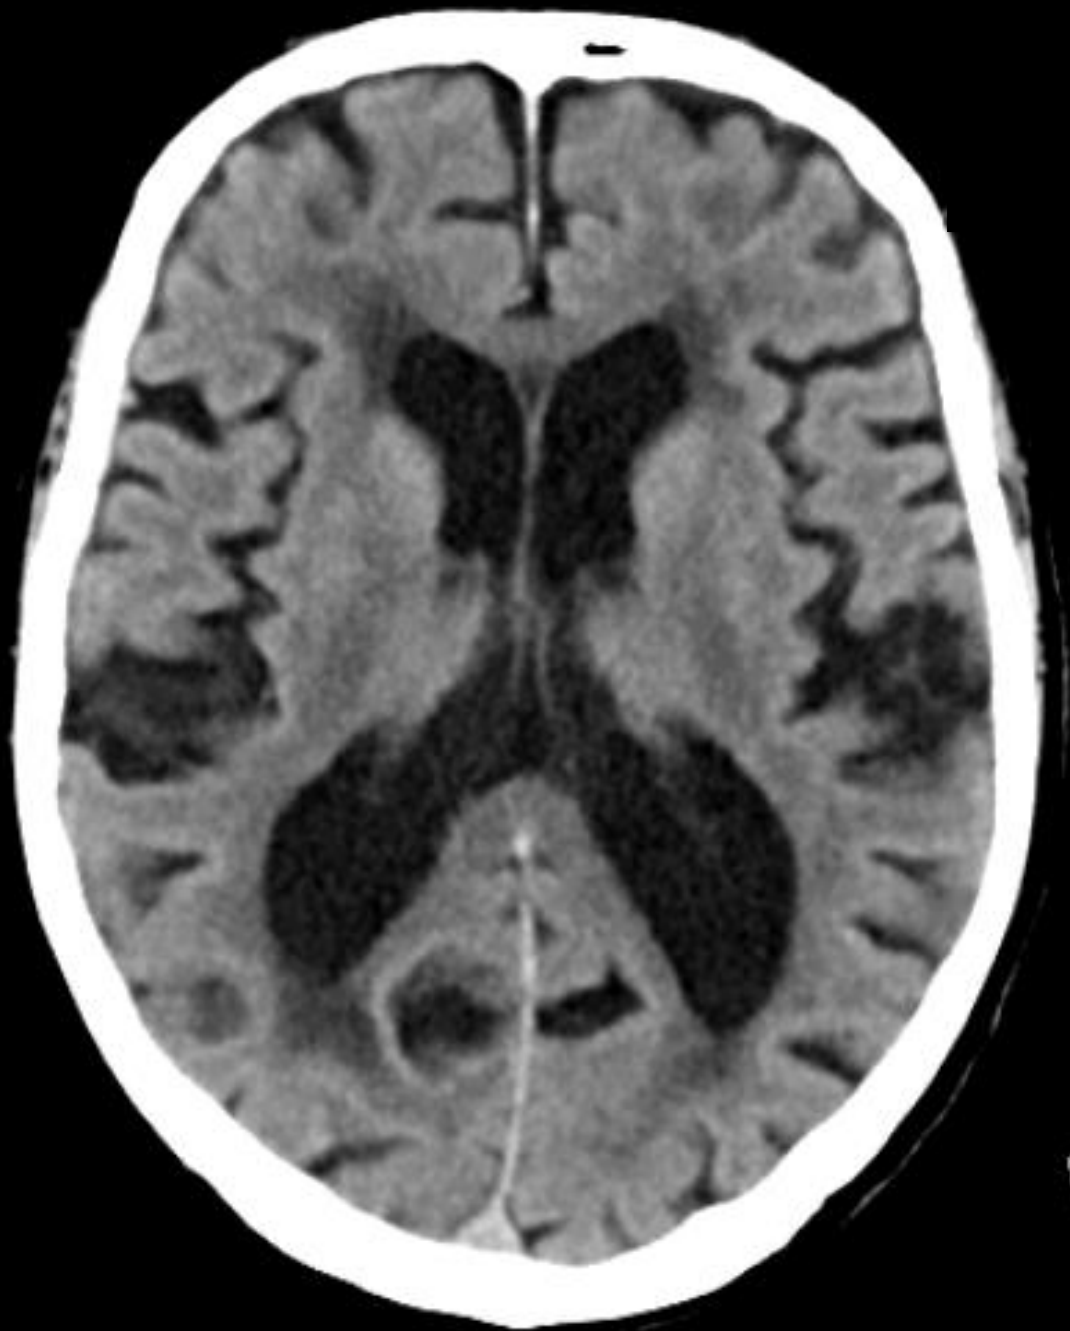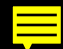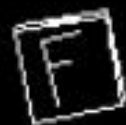

66

2



11

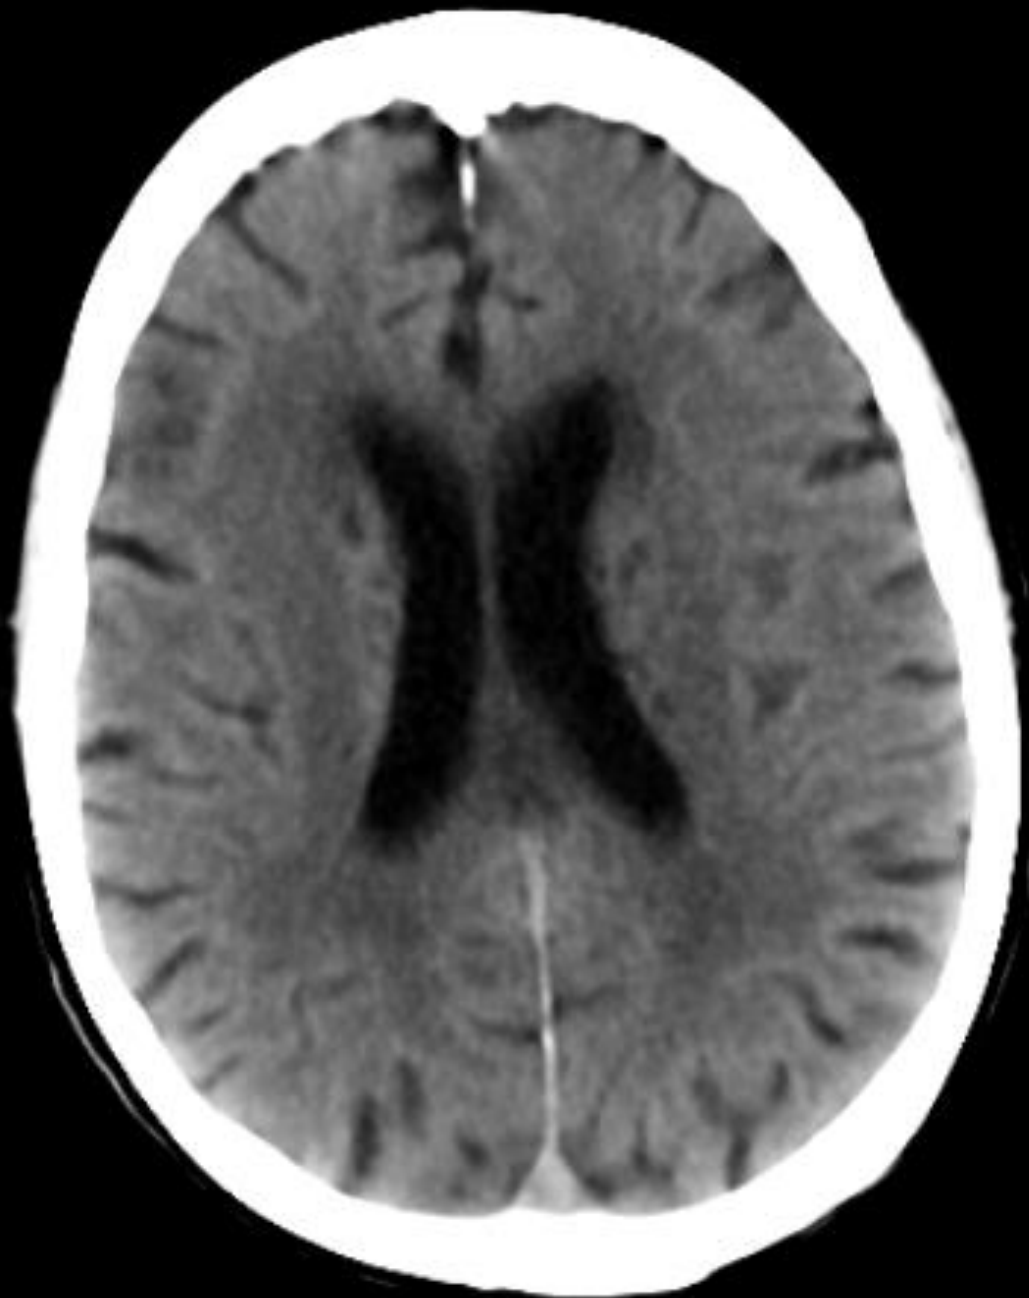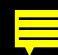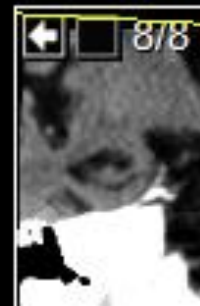

8/8



12

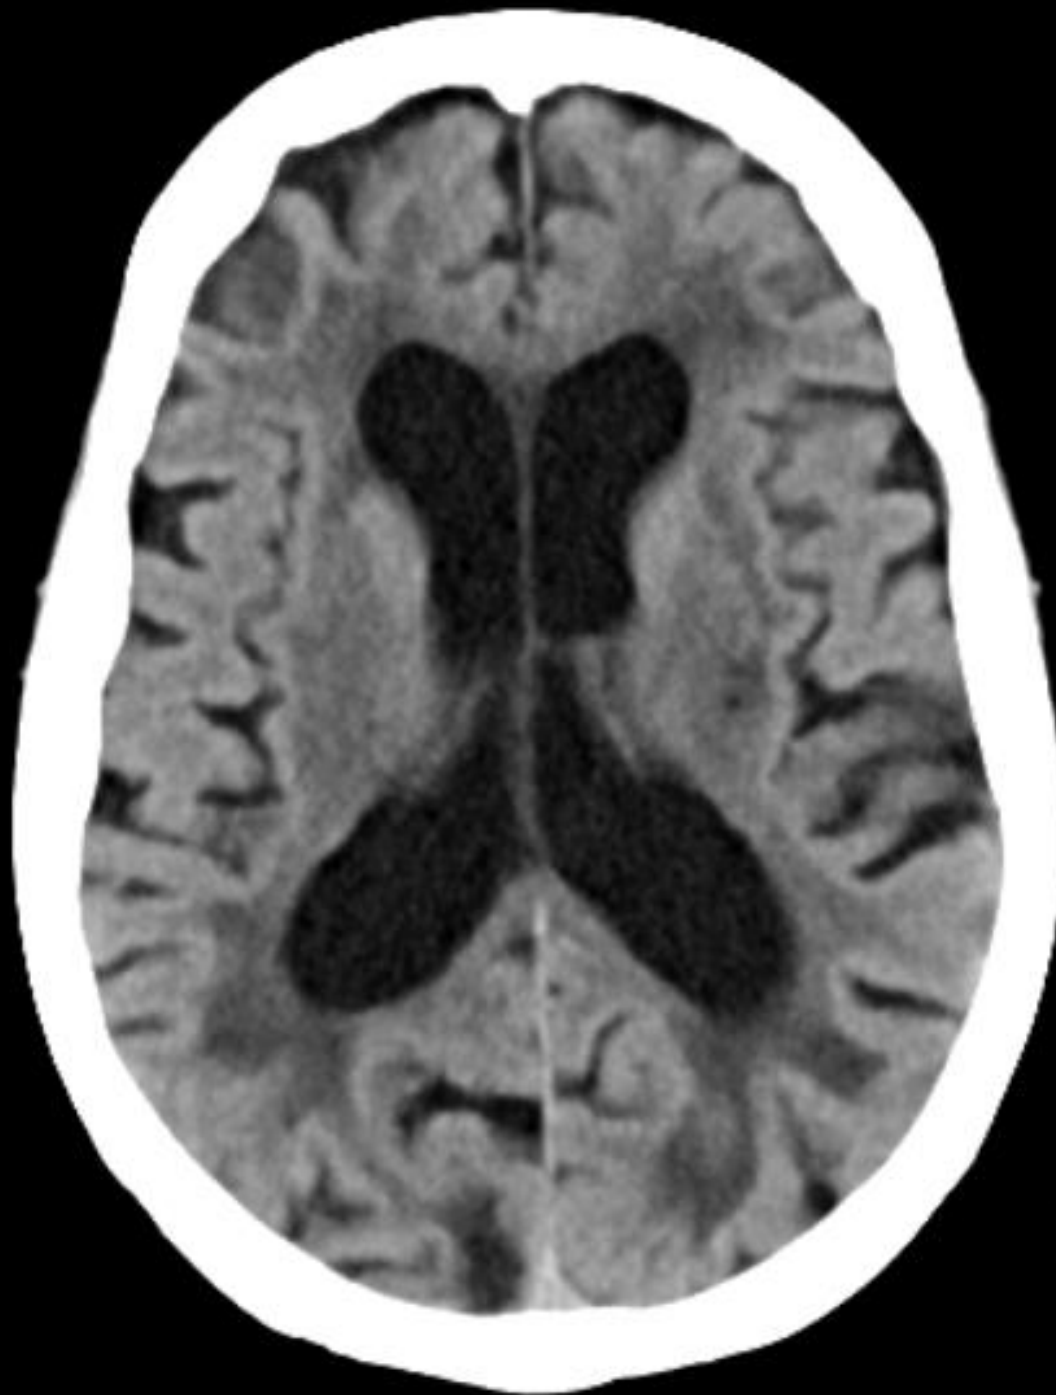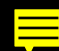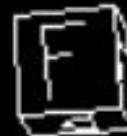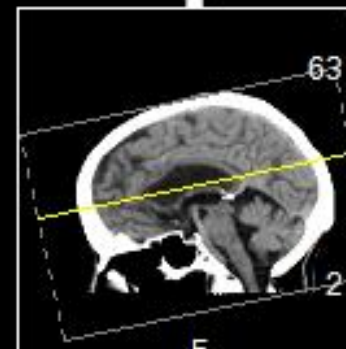

F

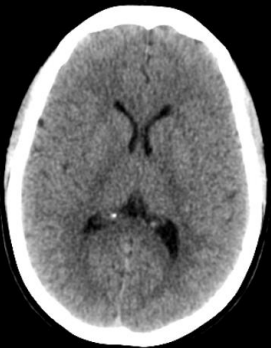

13

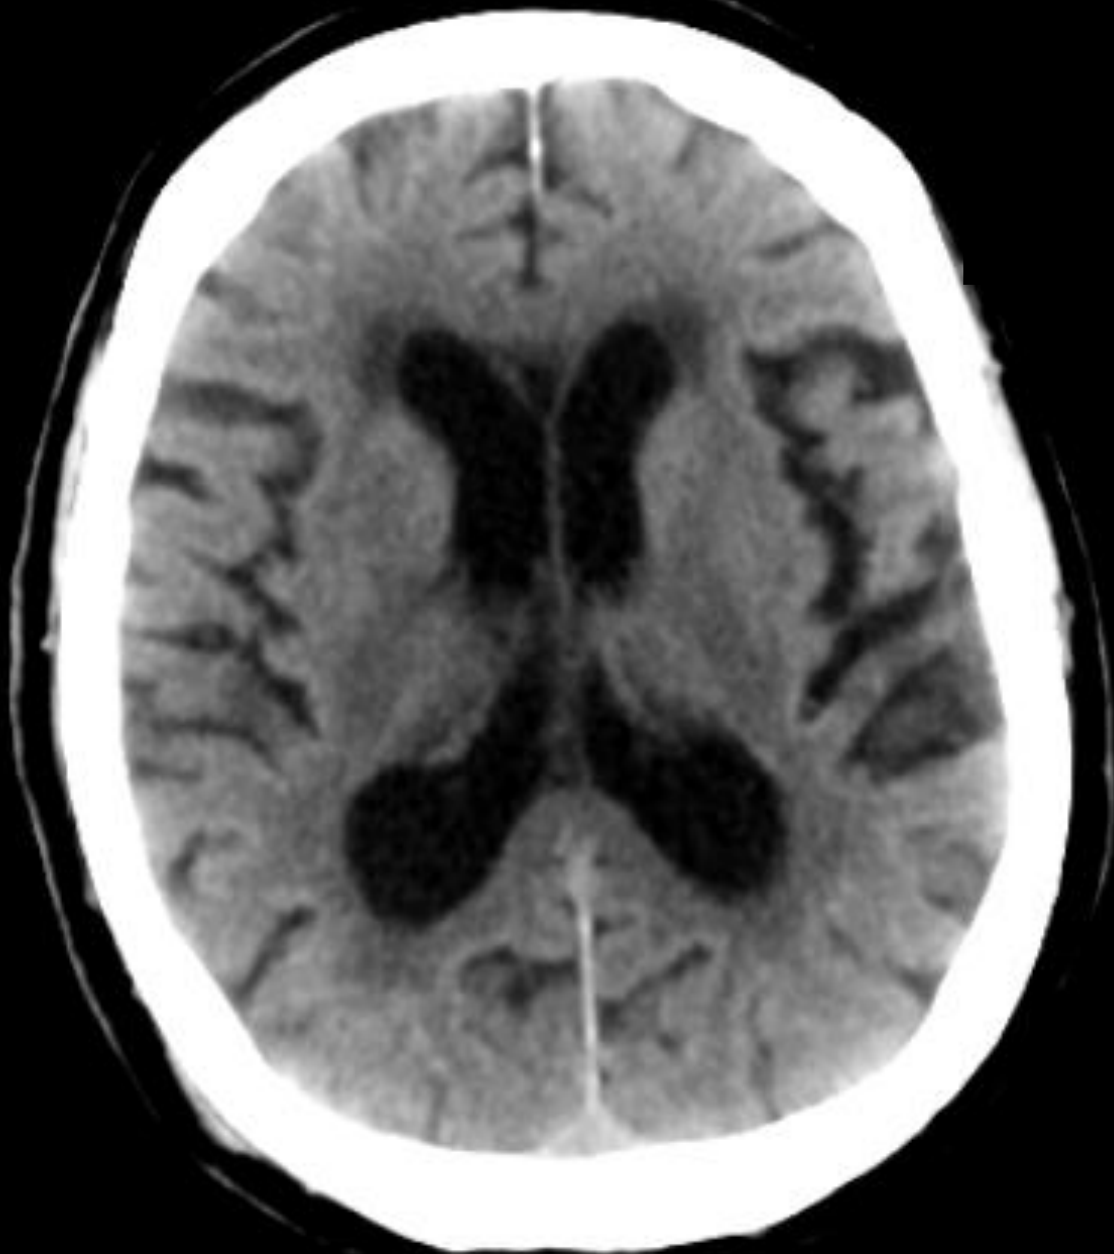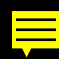

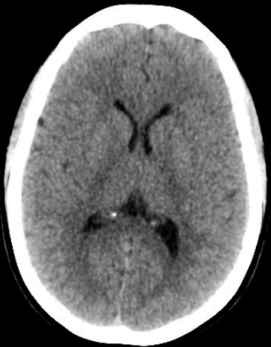

14

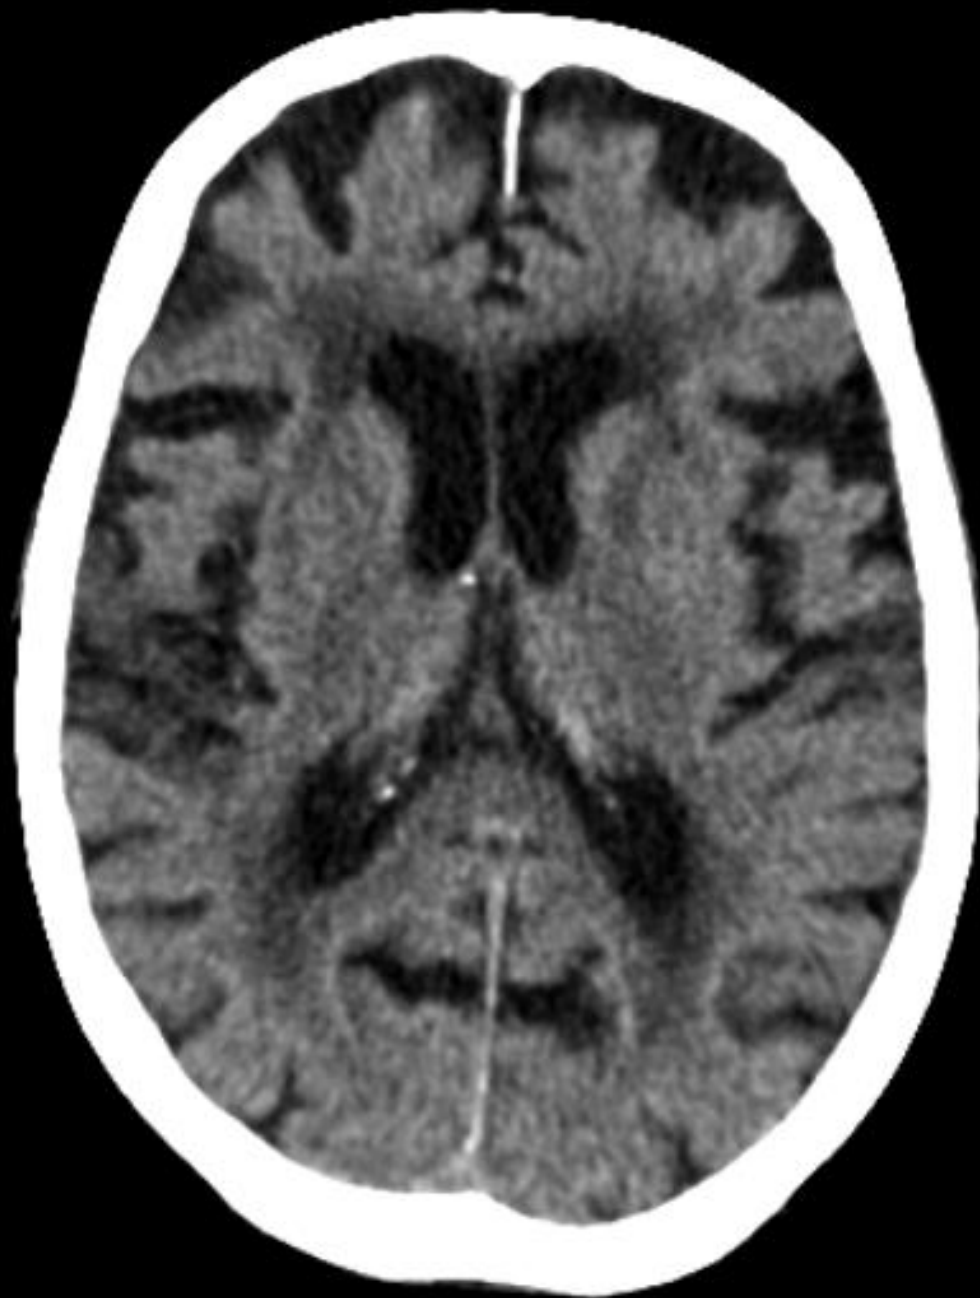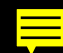

1/10

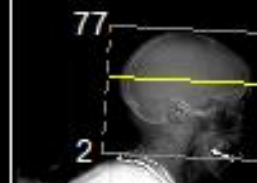

F

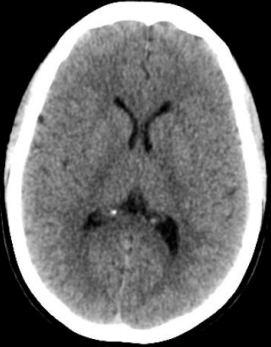

15

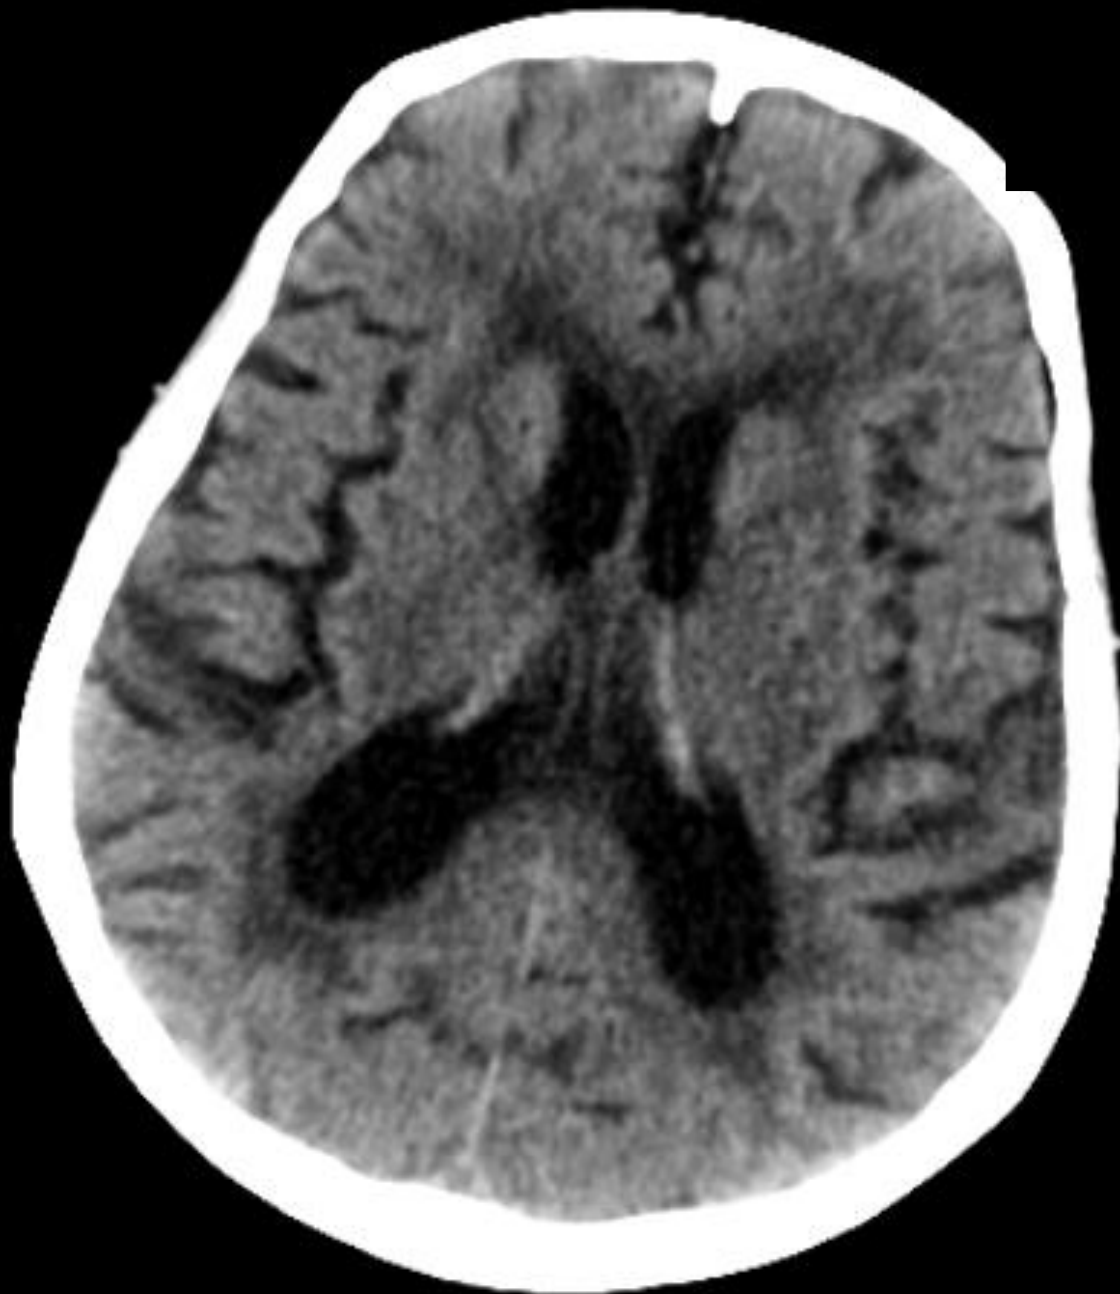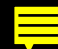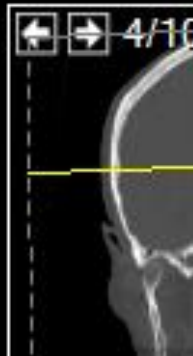

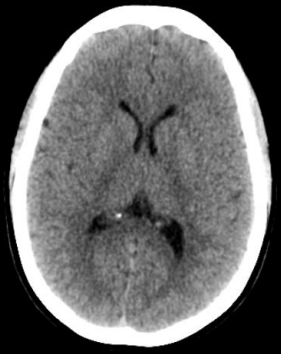

16

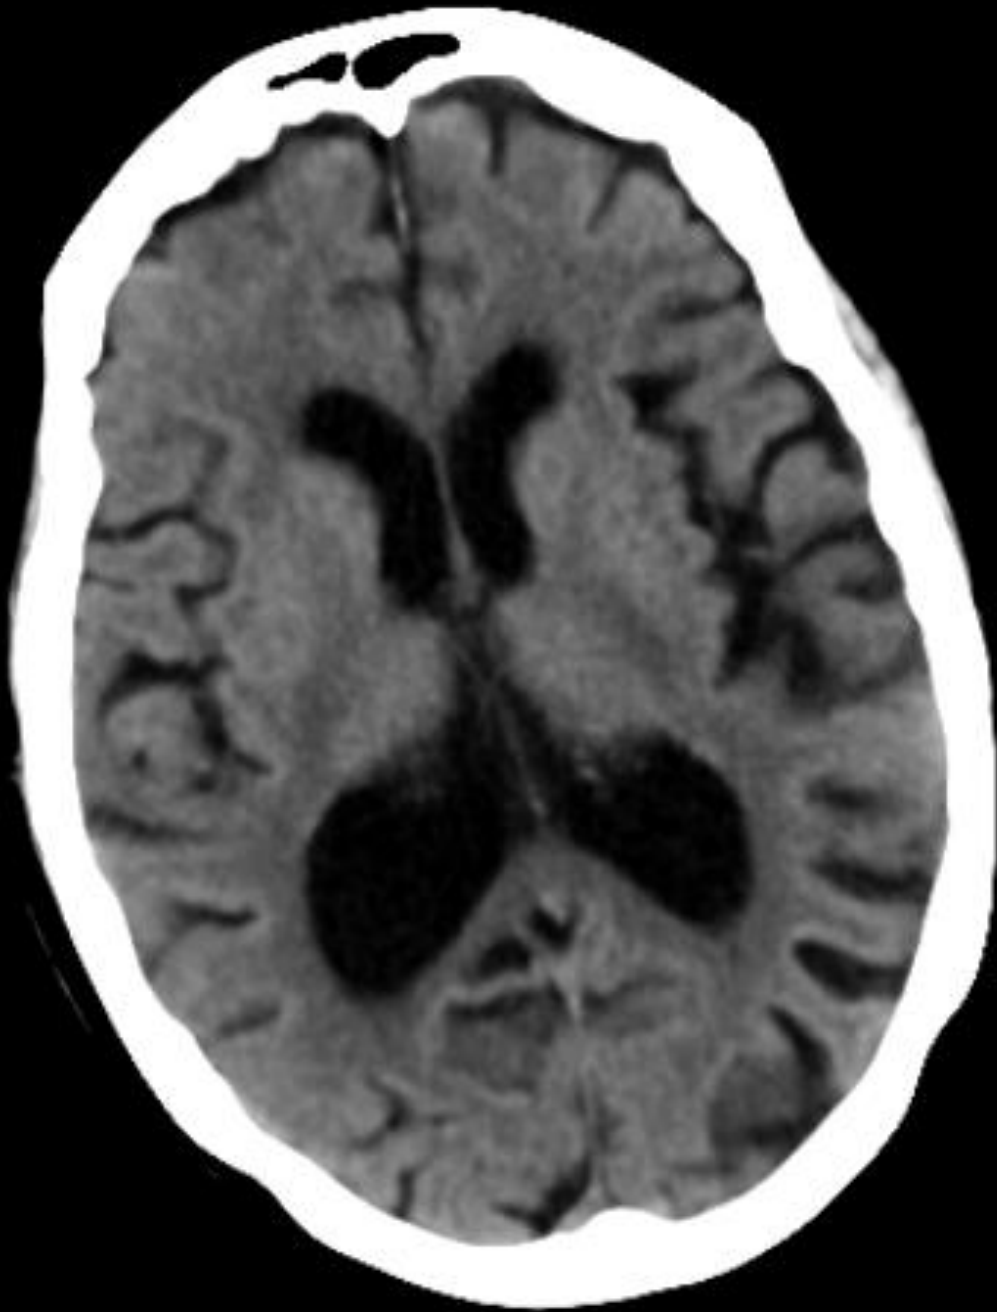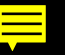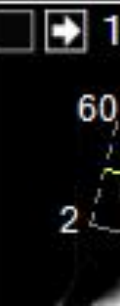





17

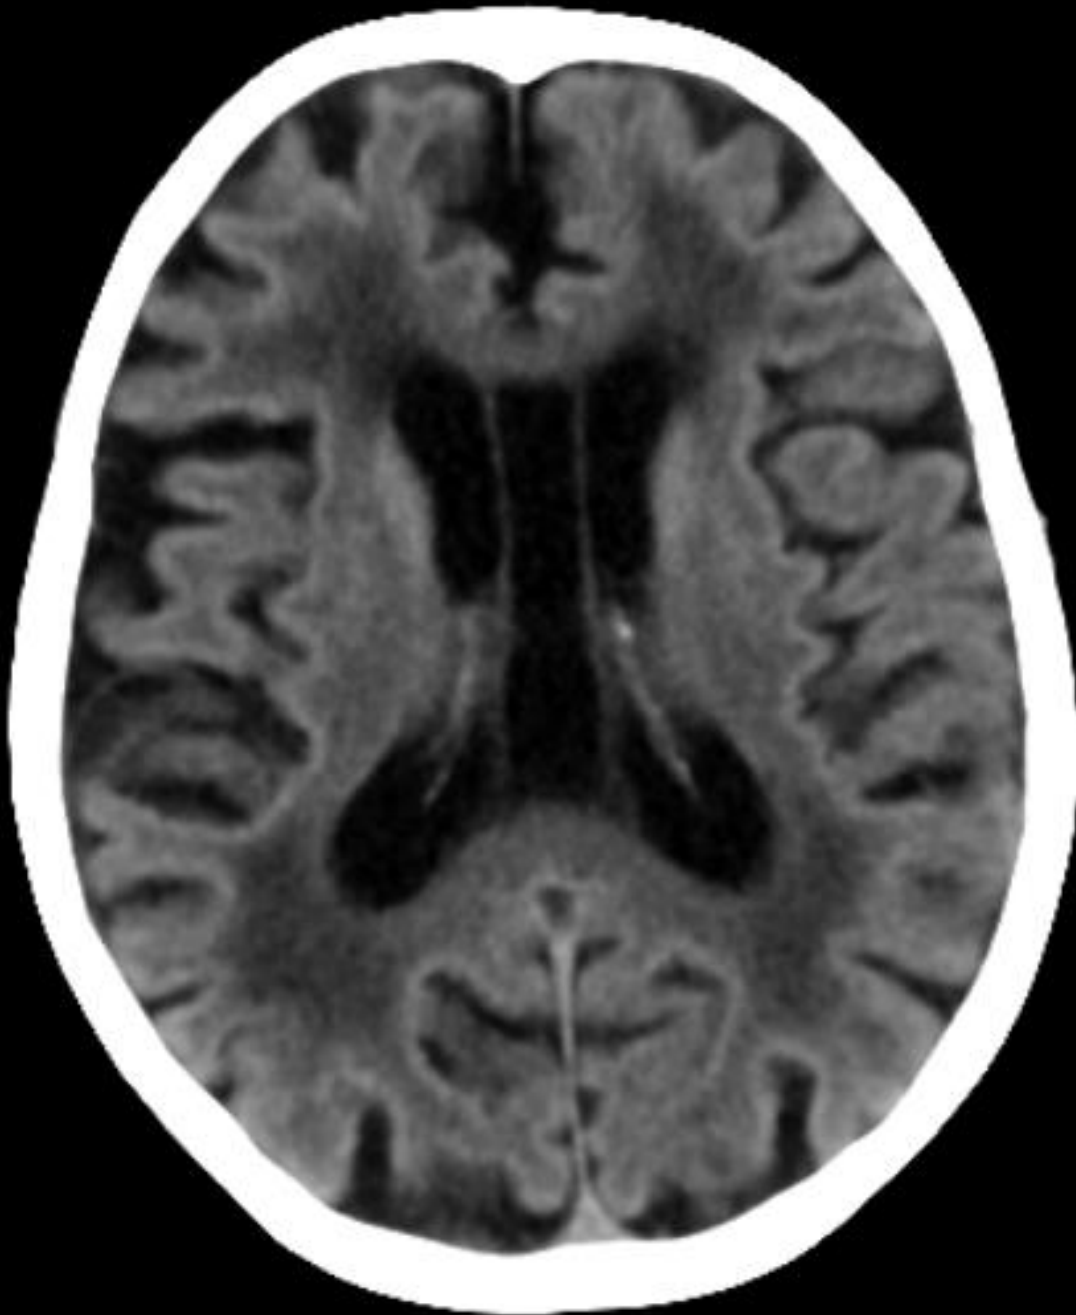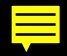

1/8

63

2

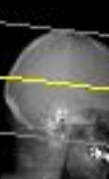



18

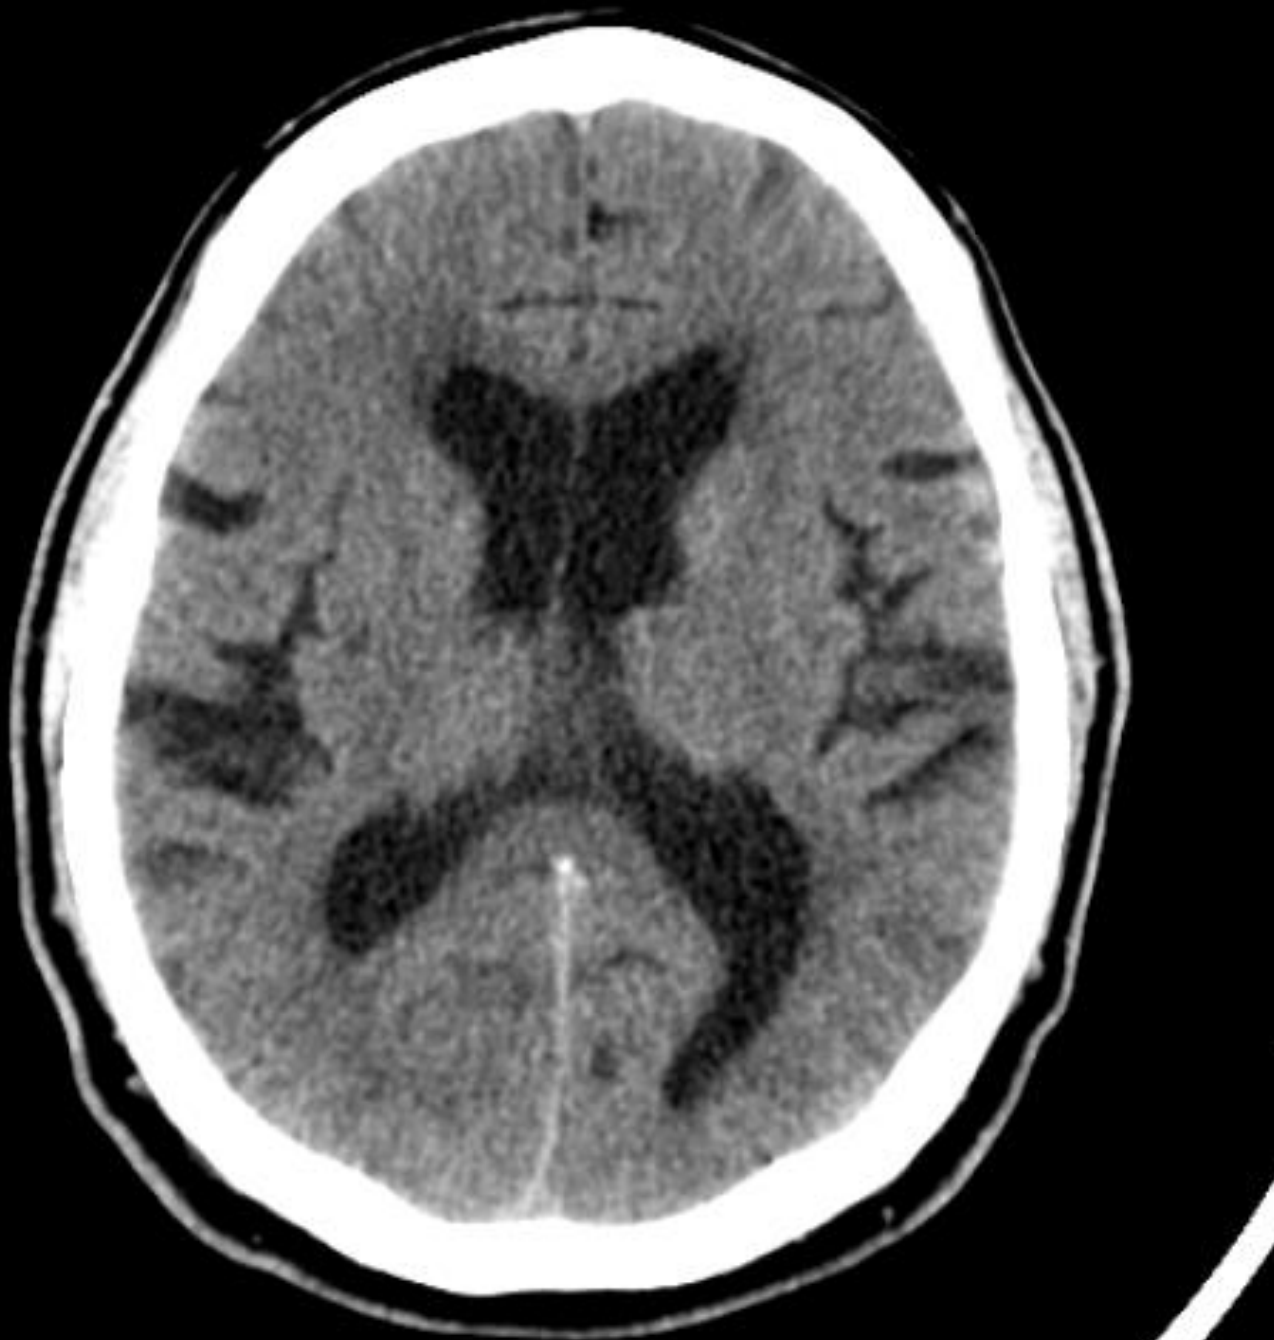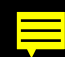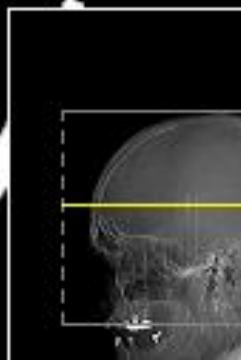

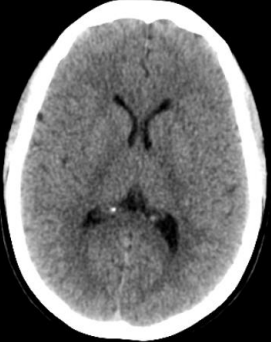

19

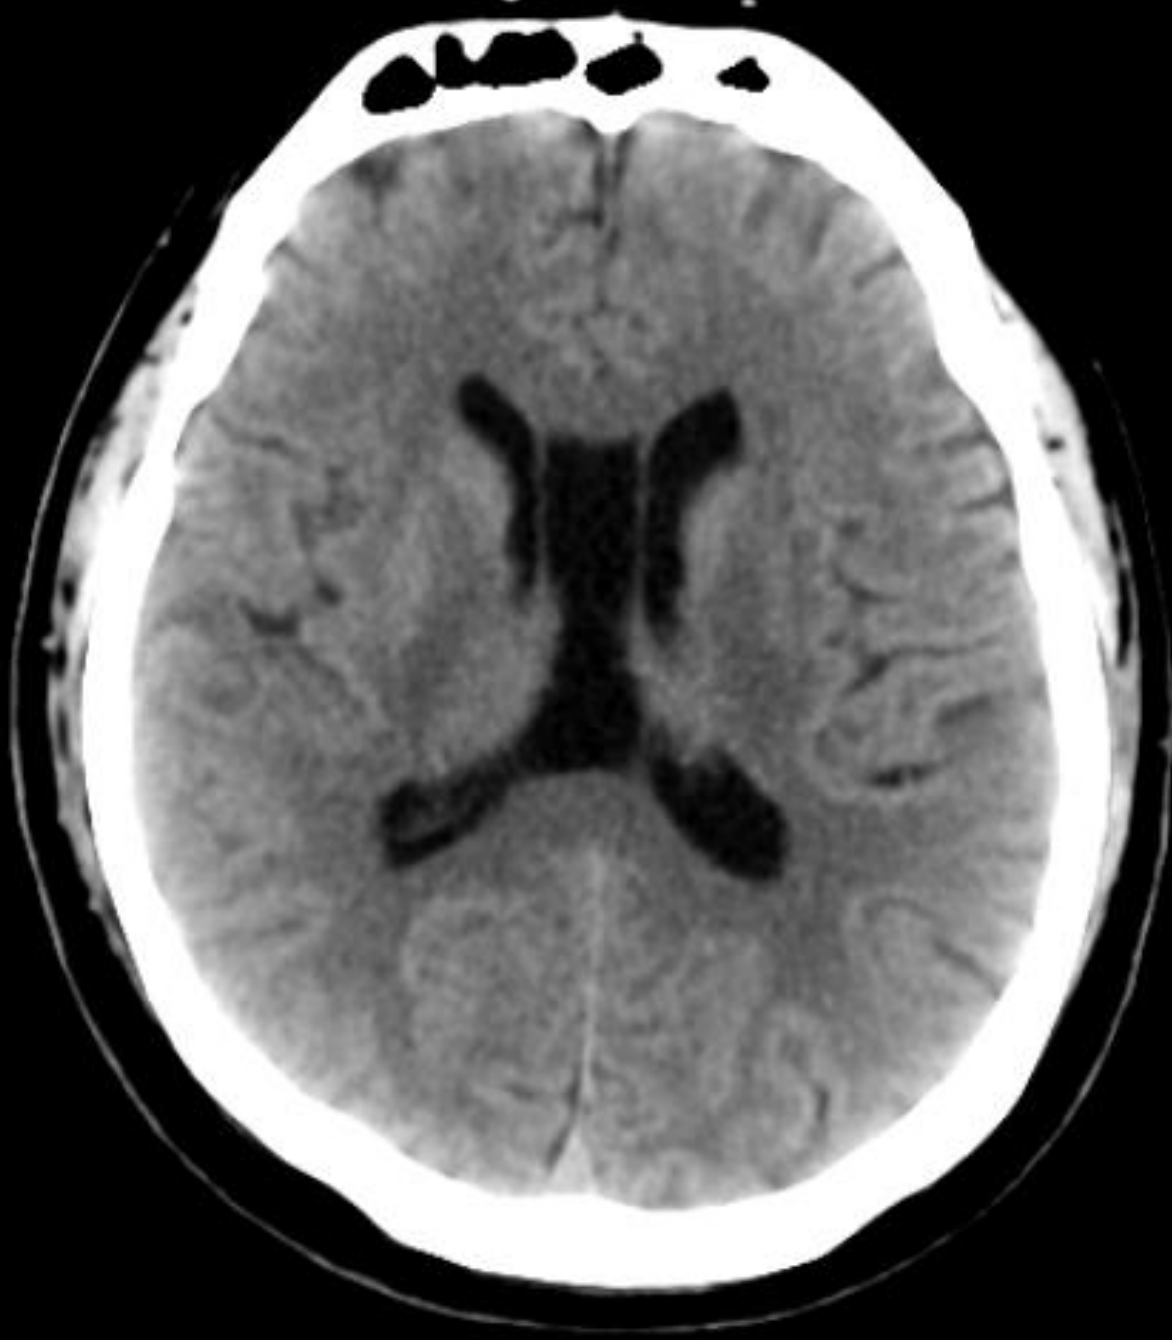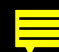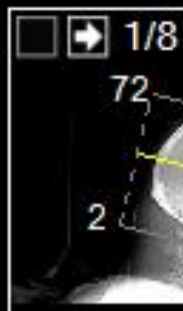

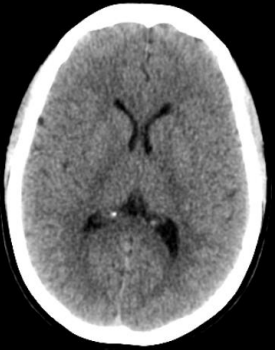

20

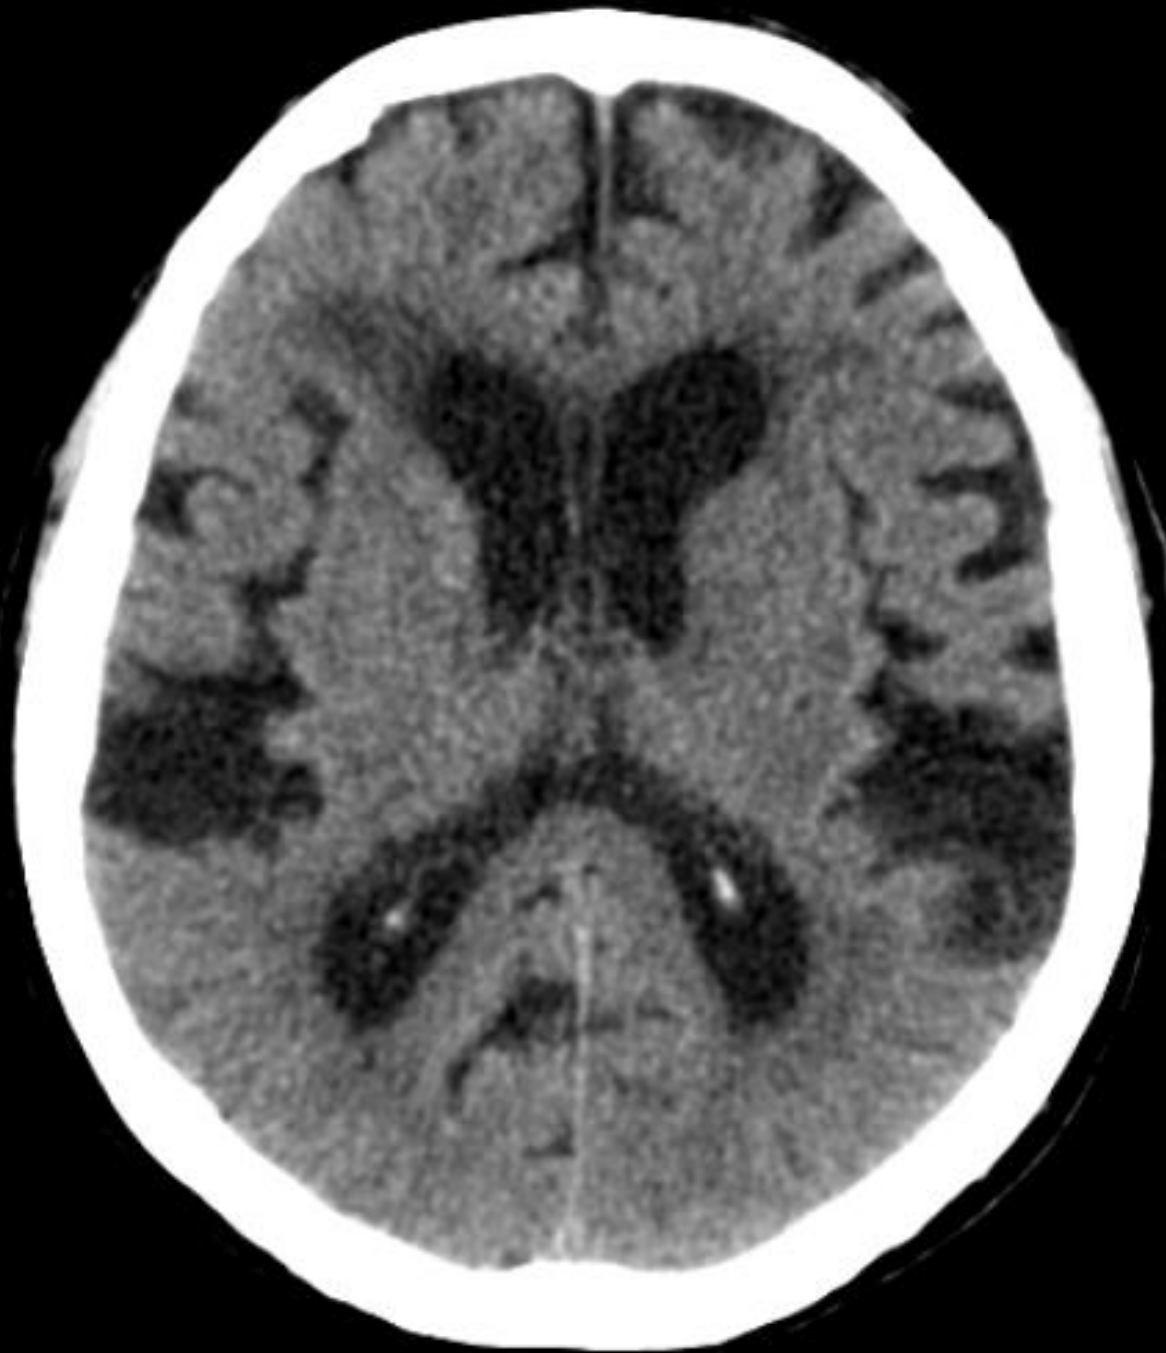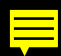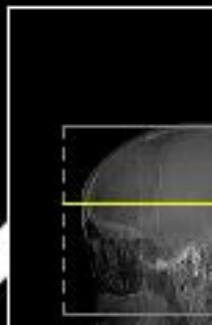

Supplement: 13244_2016_521_MOESM2_ESM.pdf [file 13244_2016_521_MOESM2_ESM.pdf]
