# Supplementary material for: Imaging biomarkers of dementia: recommended visual rating scales with teaching cases
Source: PubMed Central journal article supplement (PMC5265189; doi:10.1007/s13244-016-0521-6), 2016-12-21

1

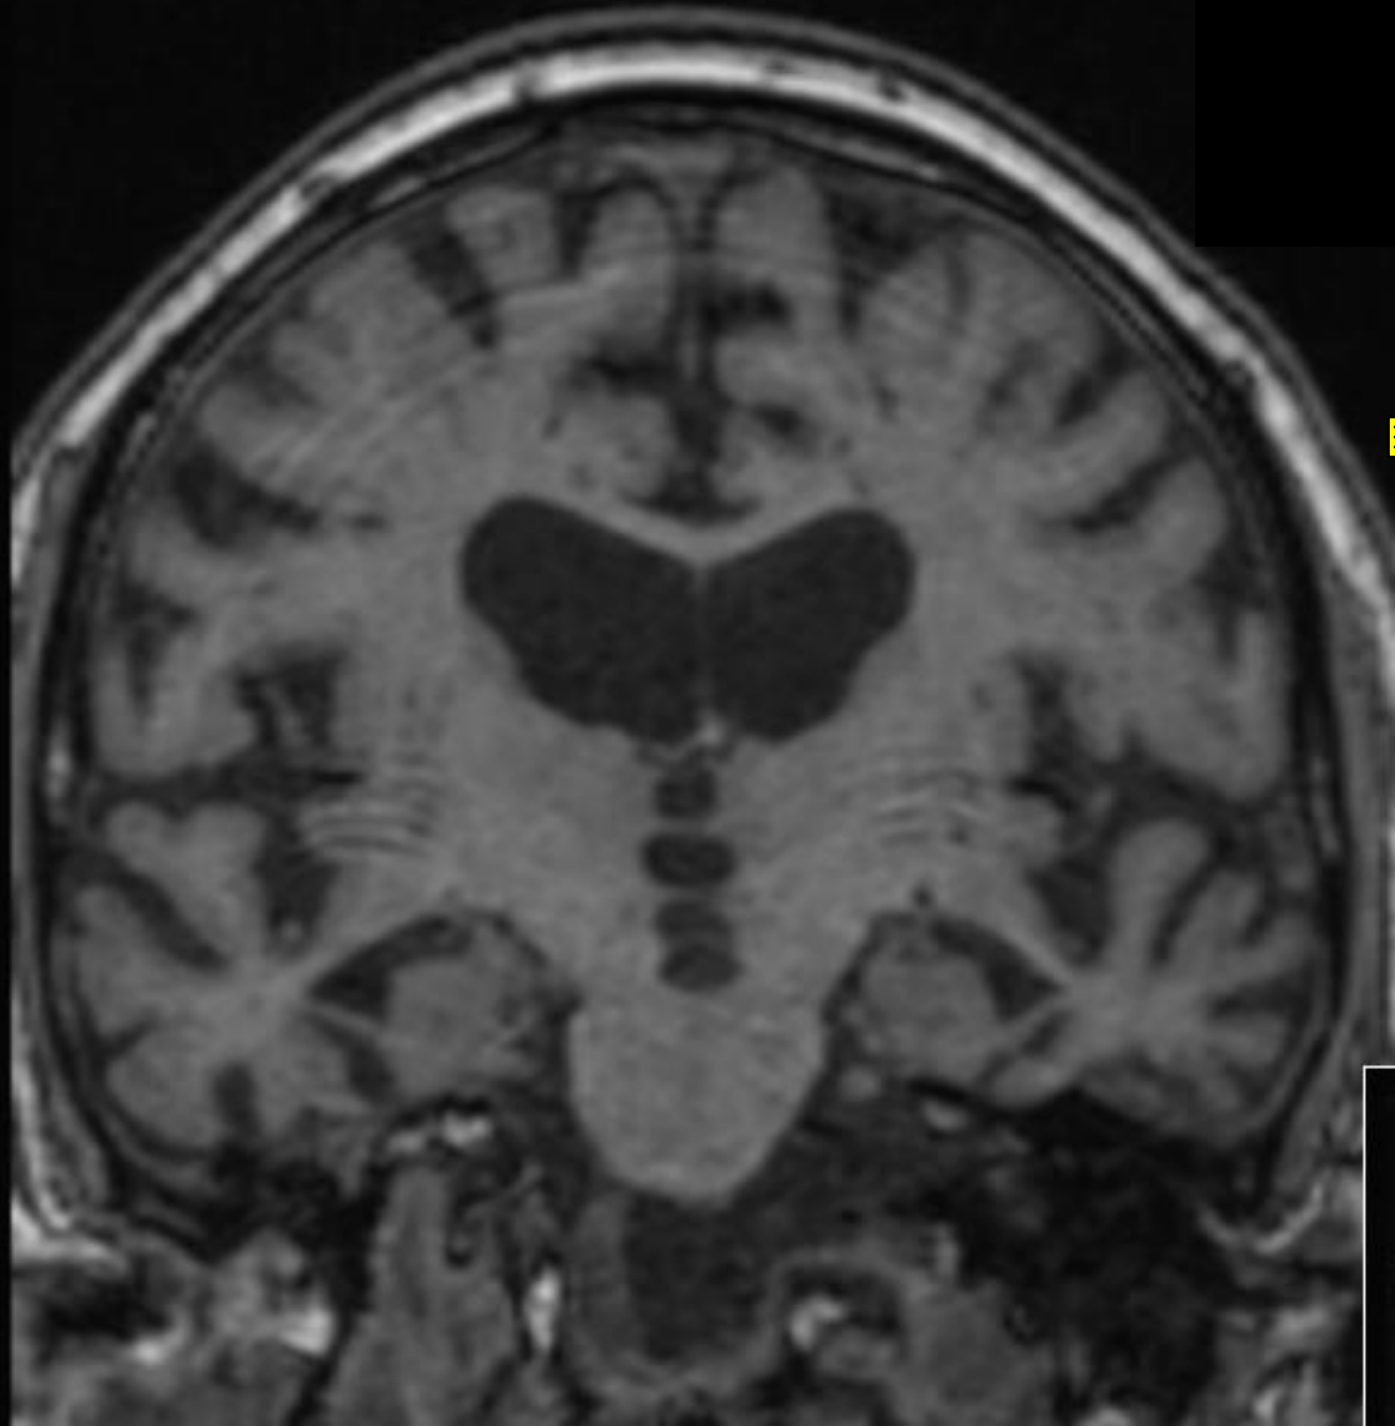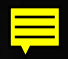

Cor>Tra 4  
>Sag -0

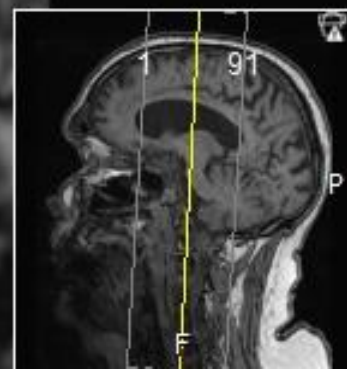

2

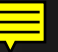

1/3

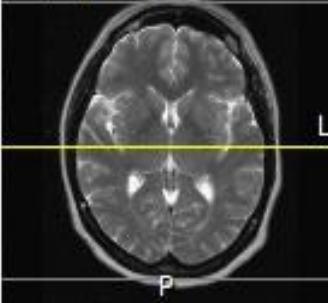

3

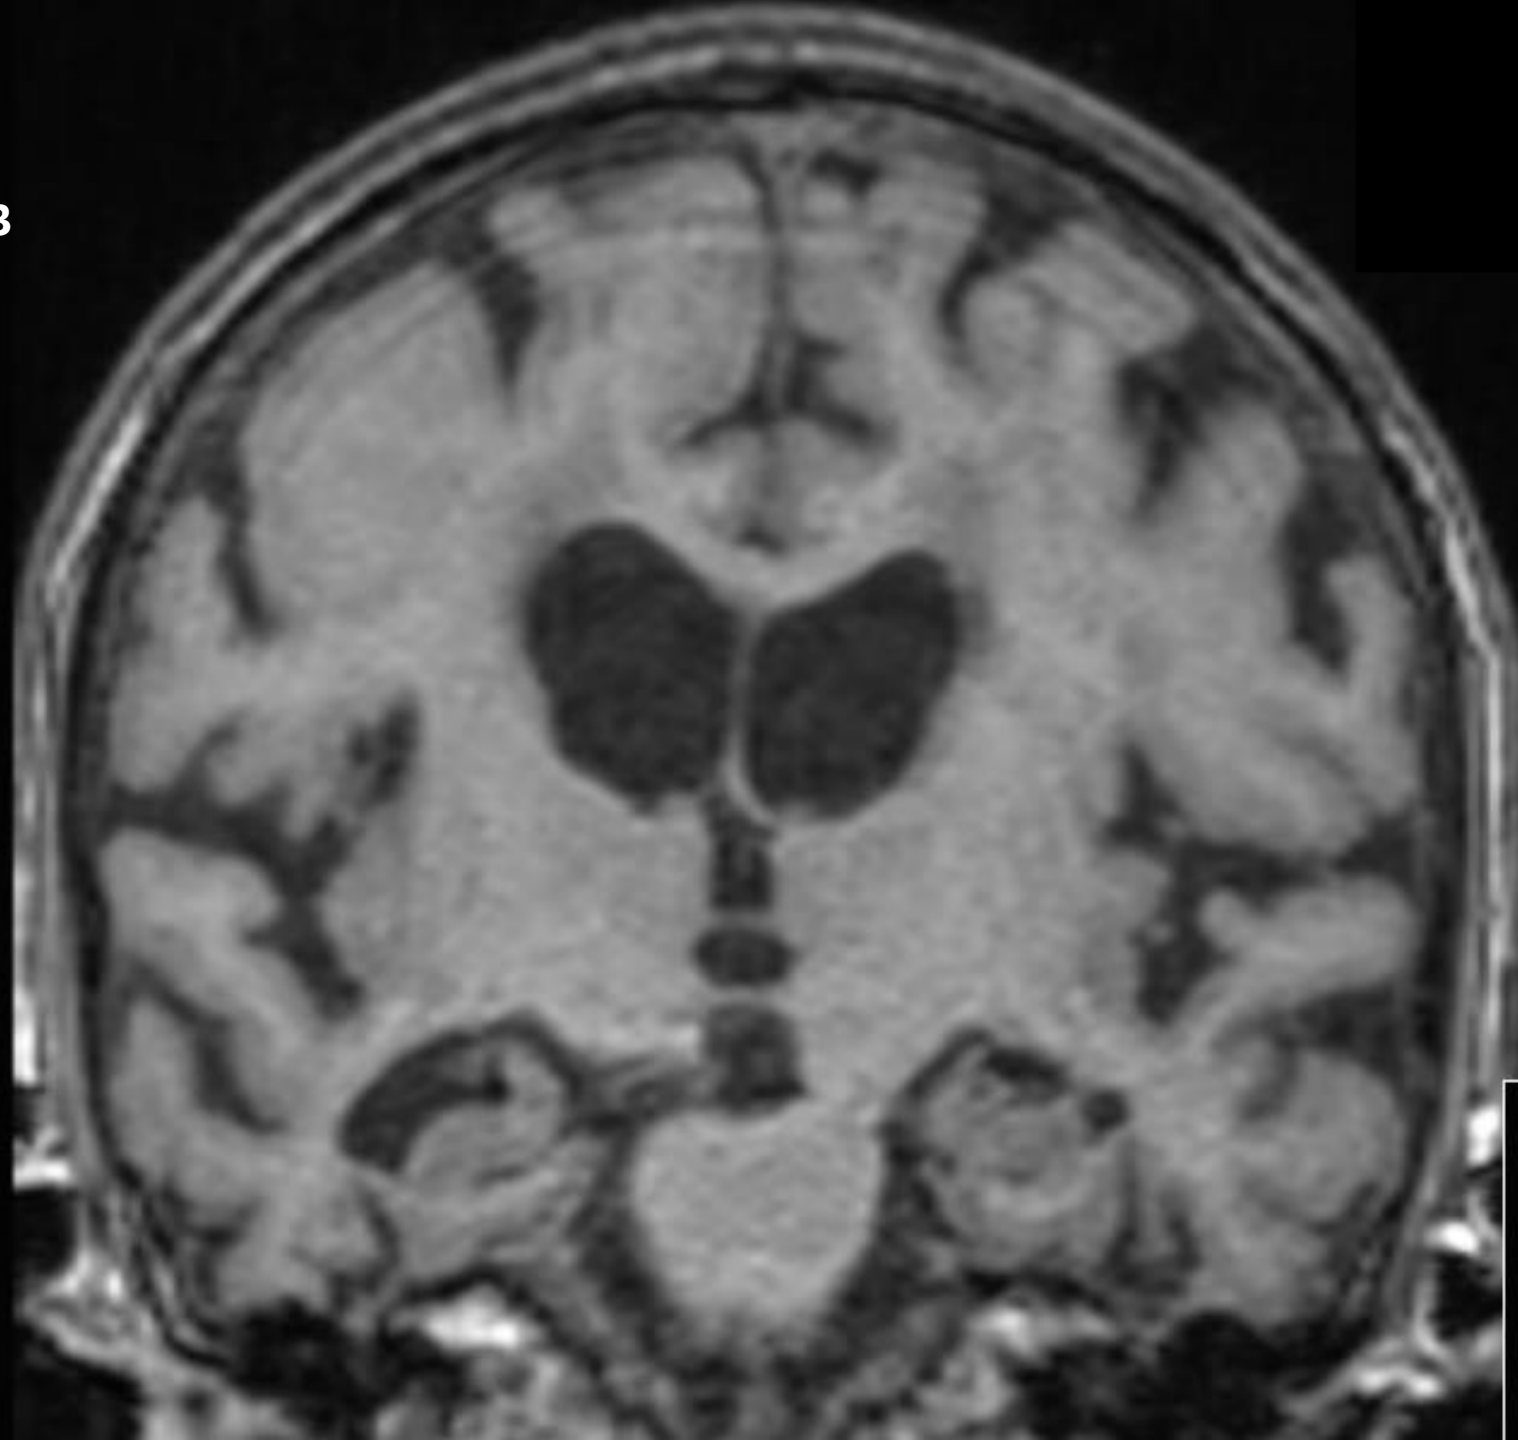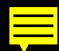

Cor>Tra -  
>Sag -1

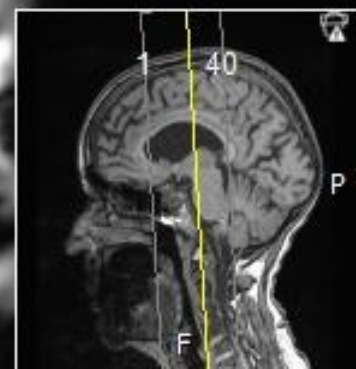

4

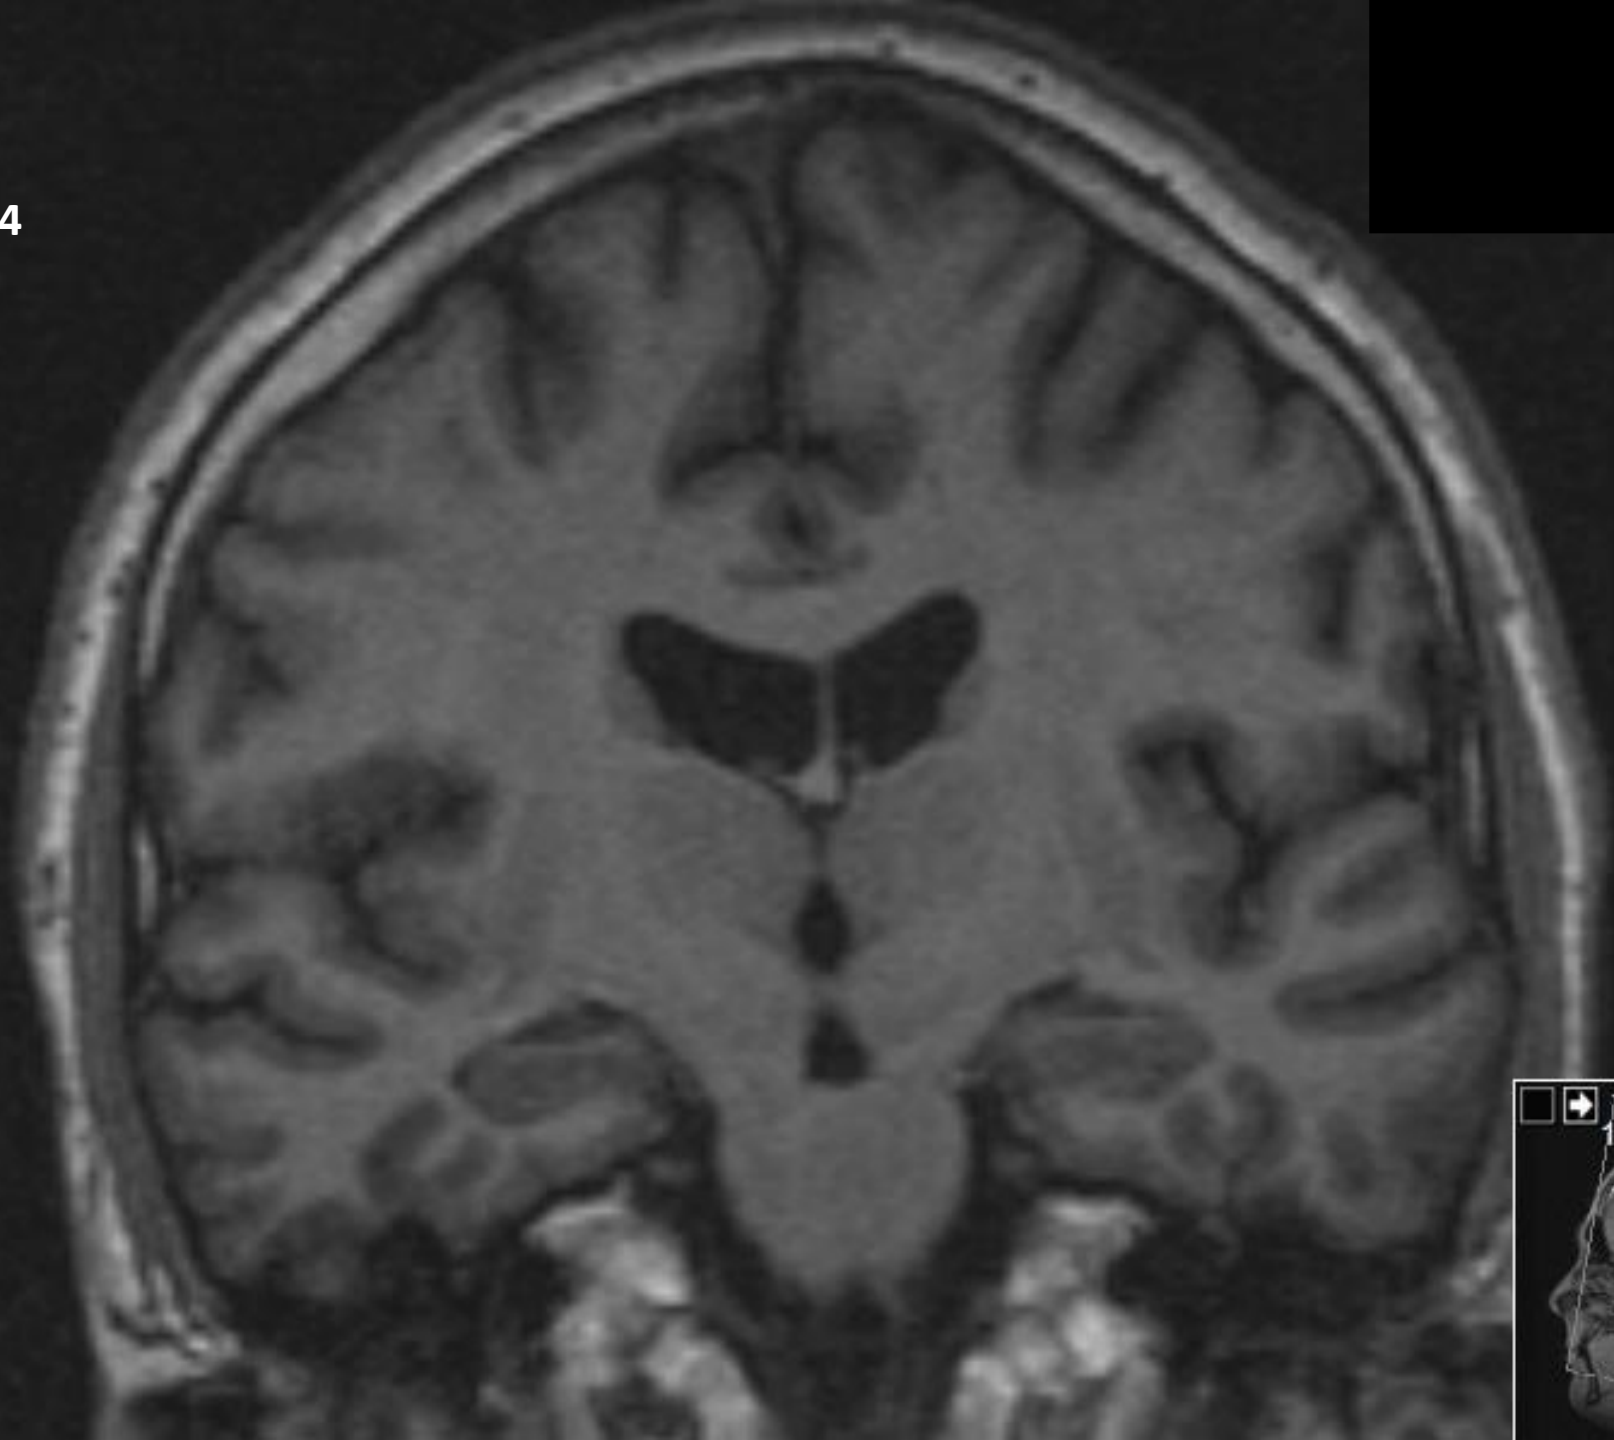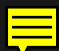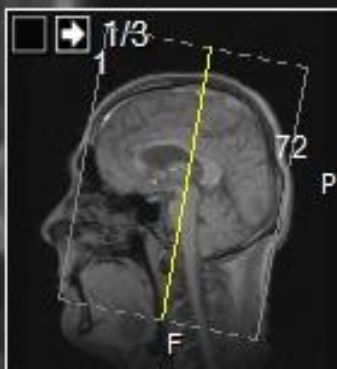

5

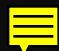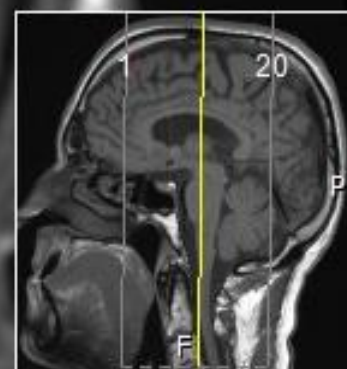

6

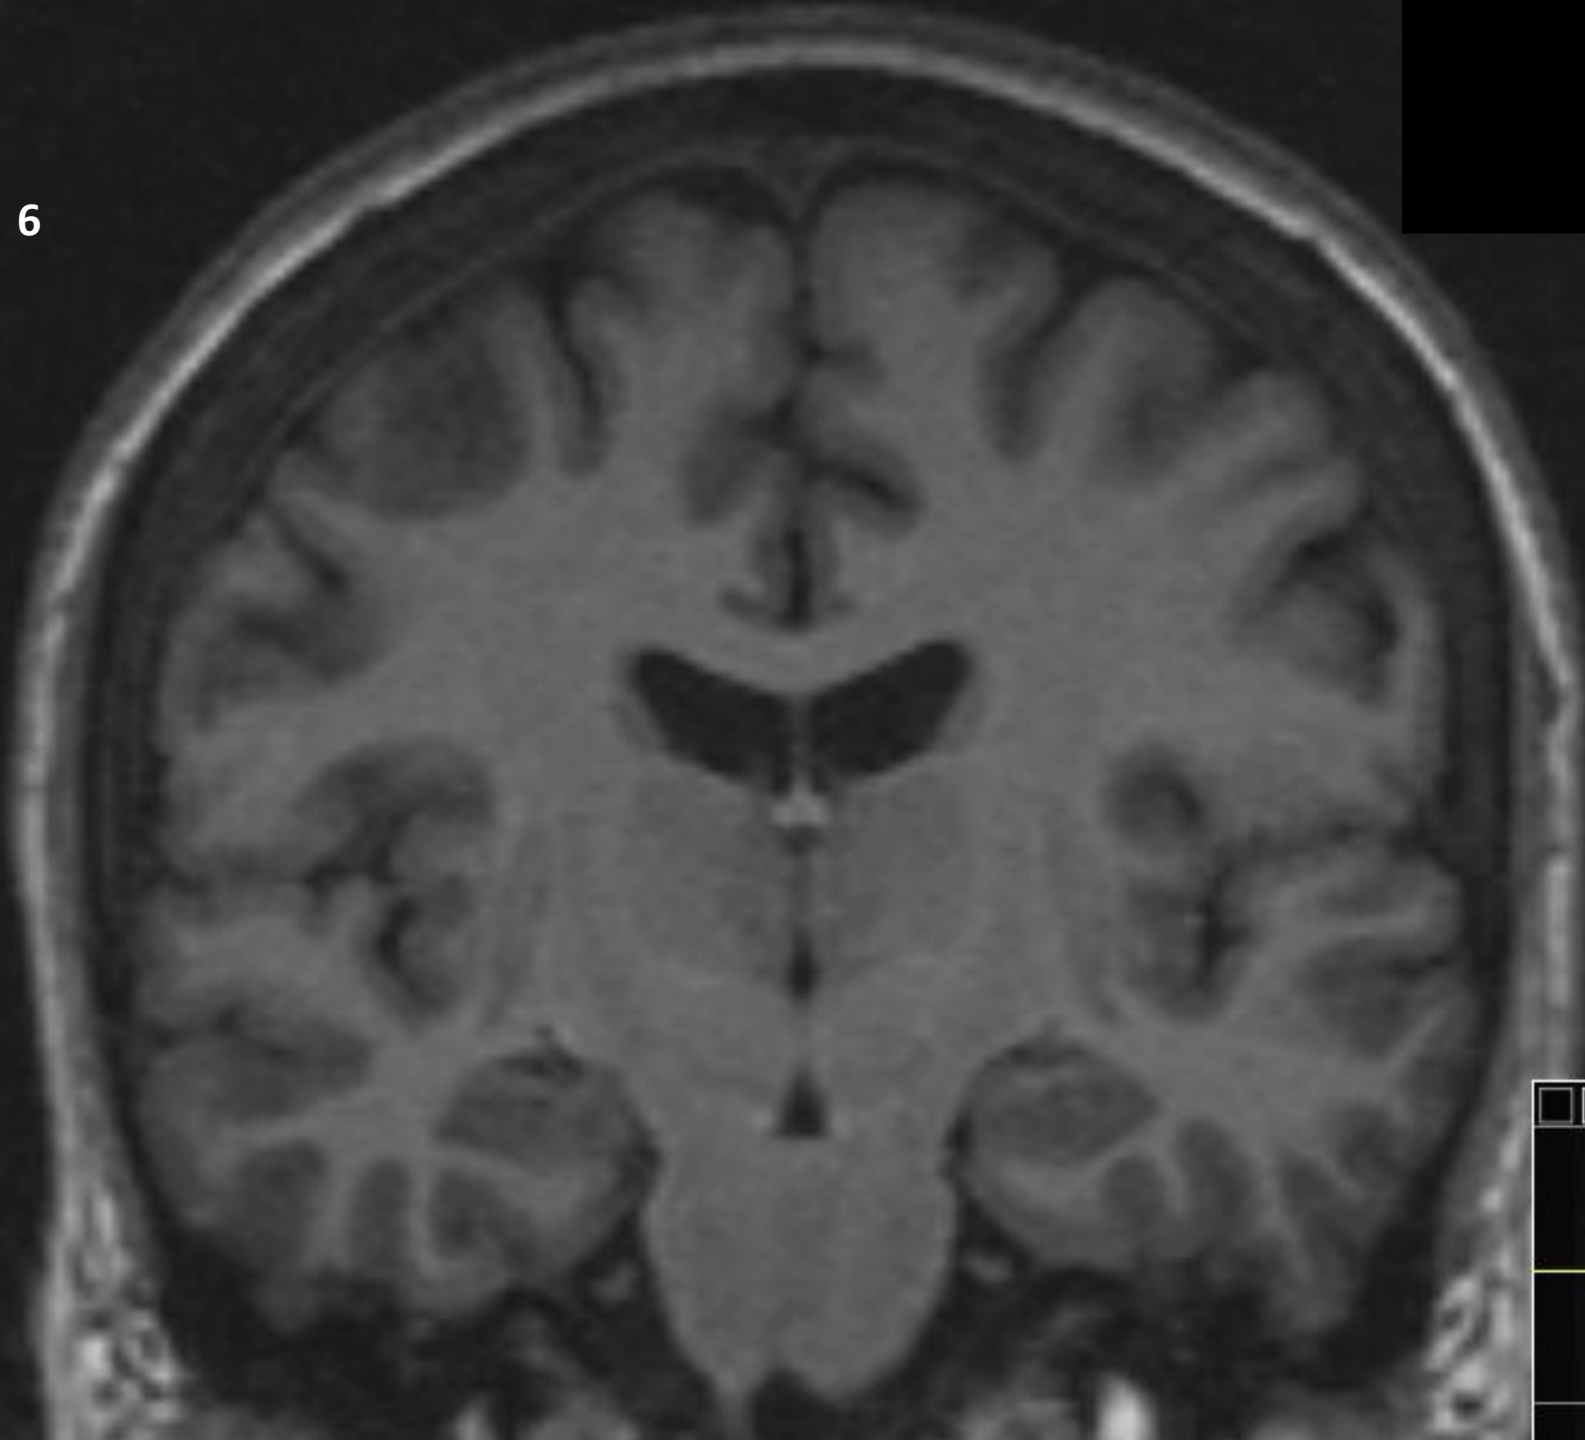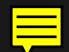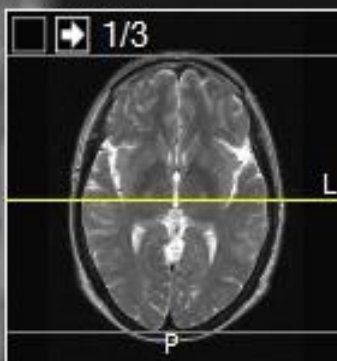

7

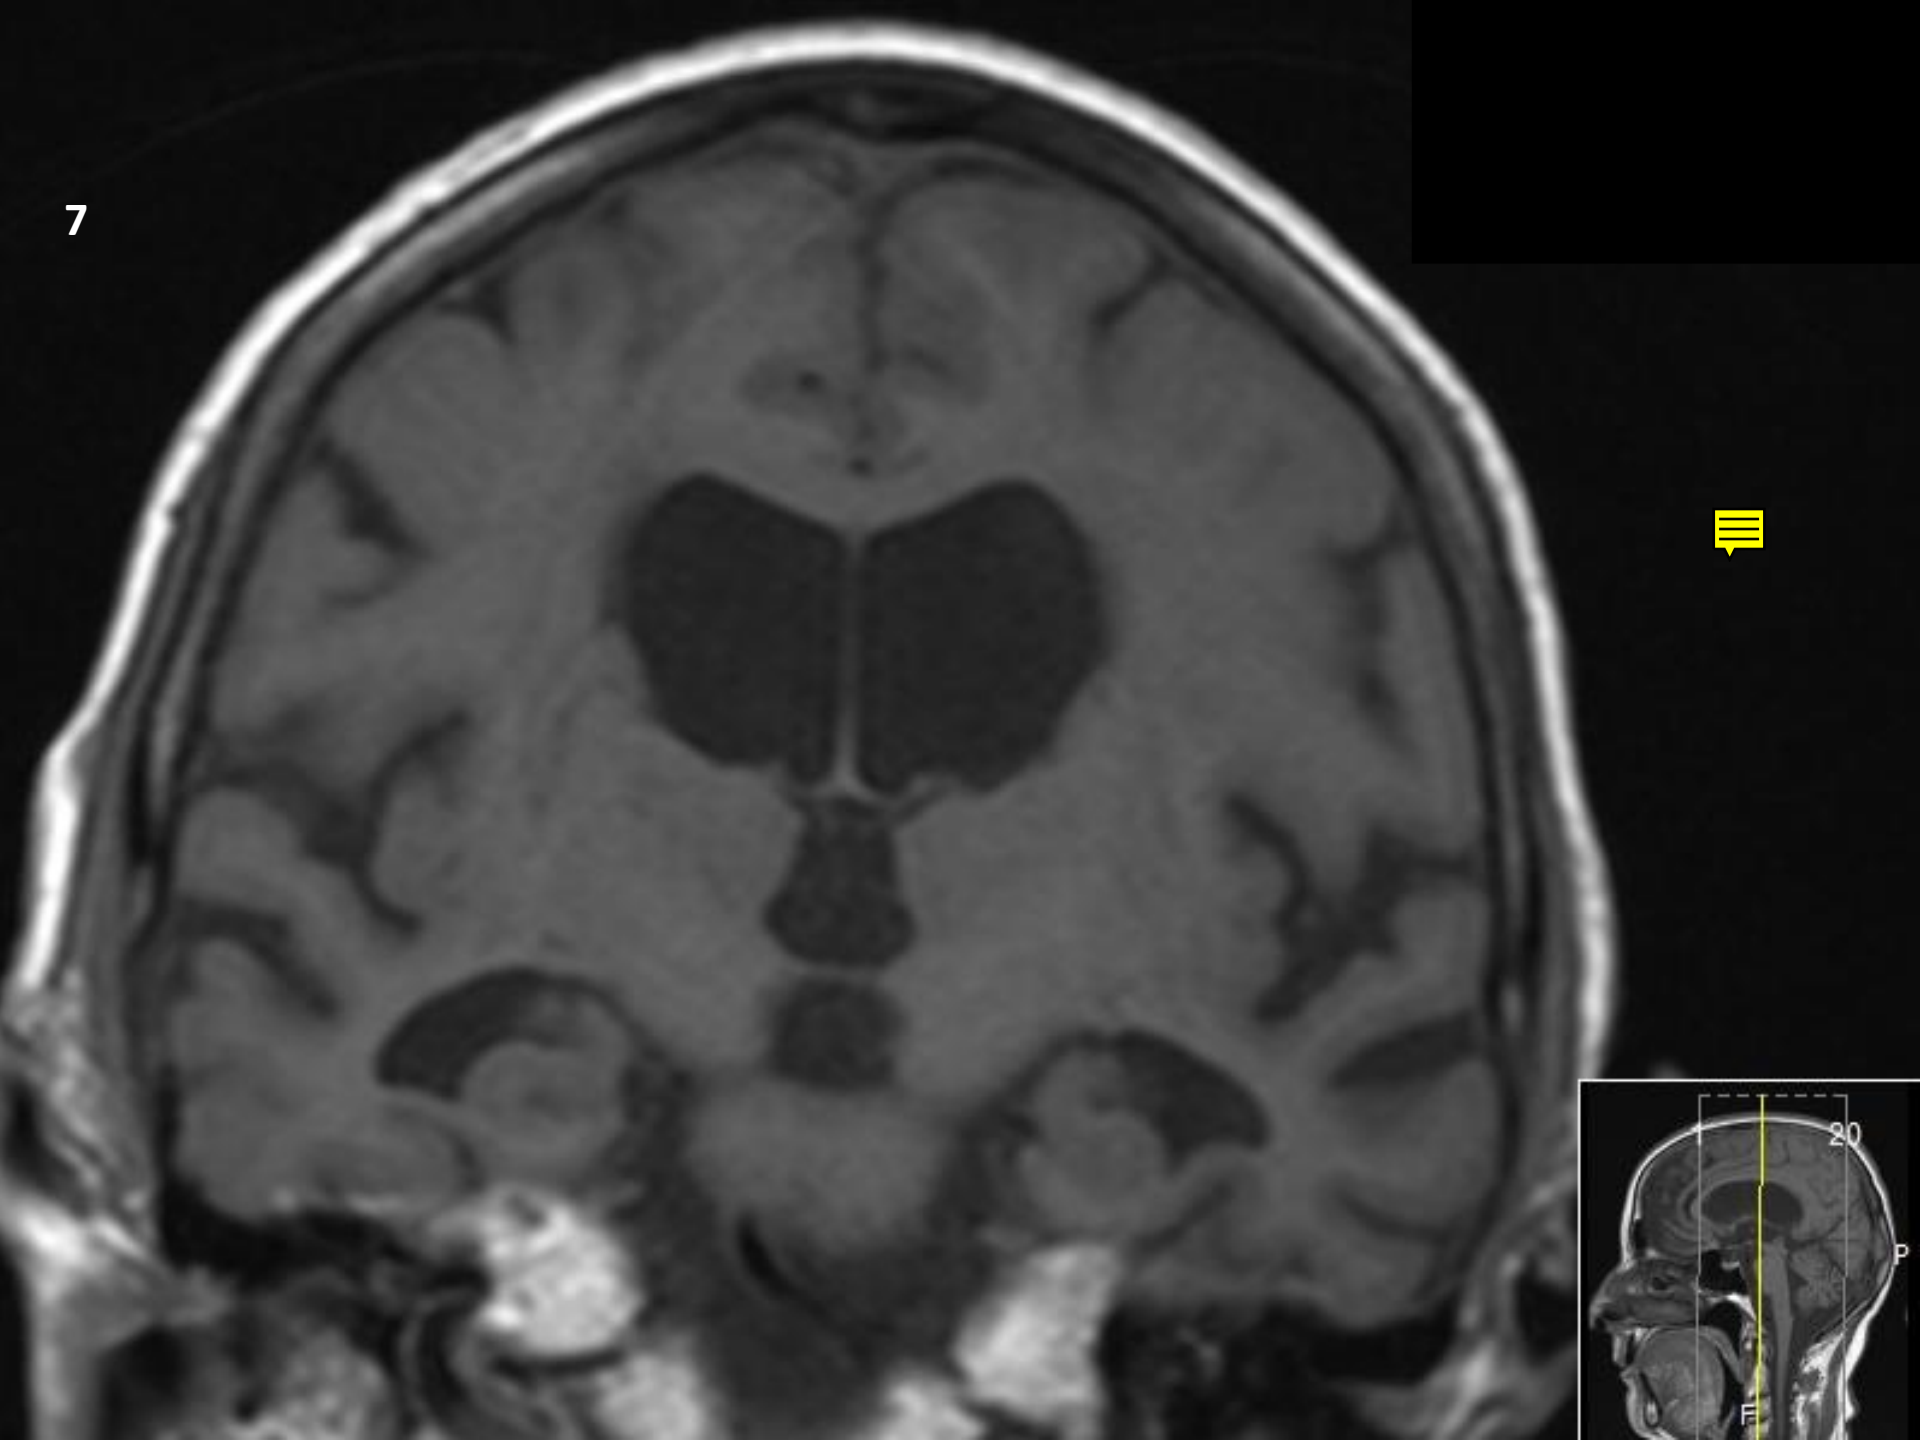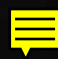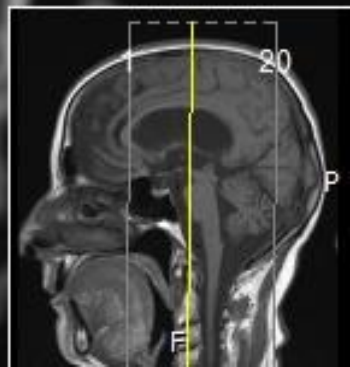

8

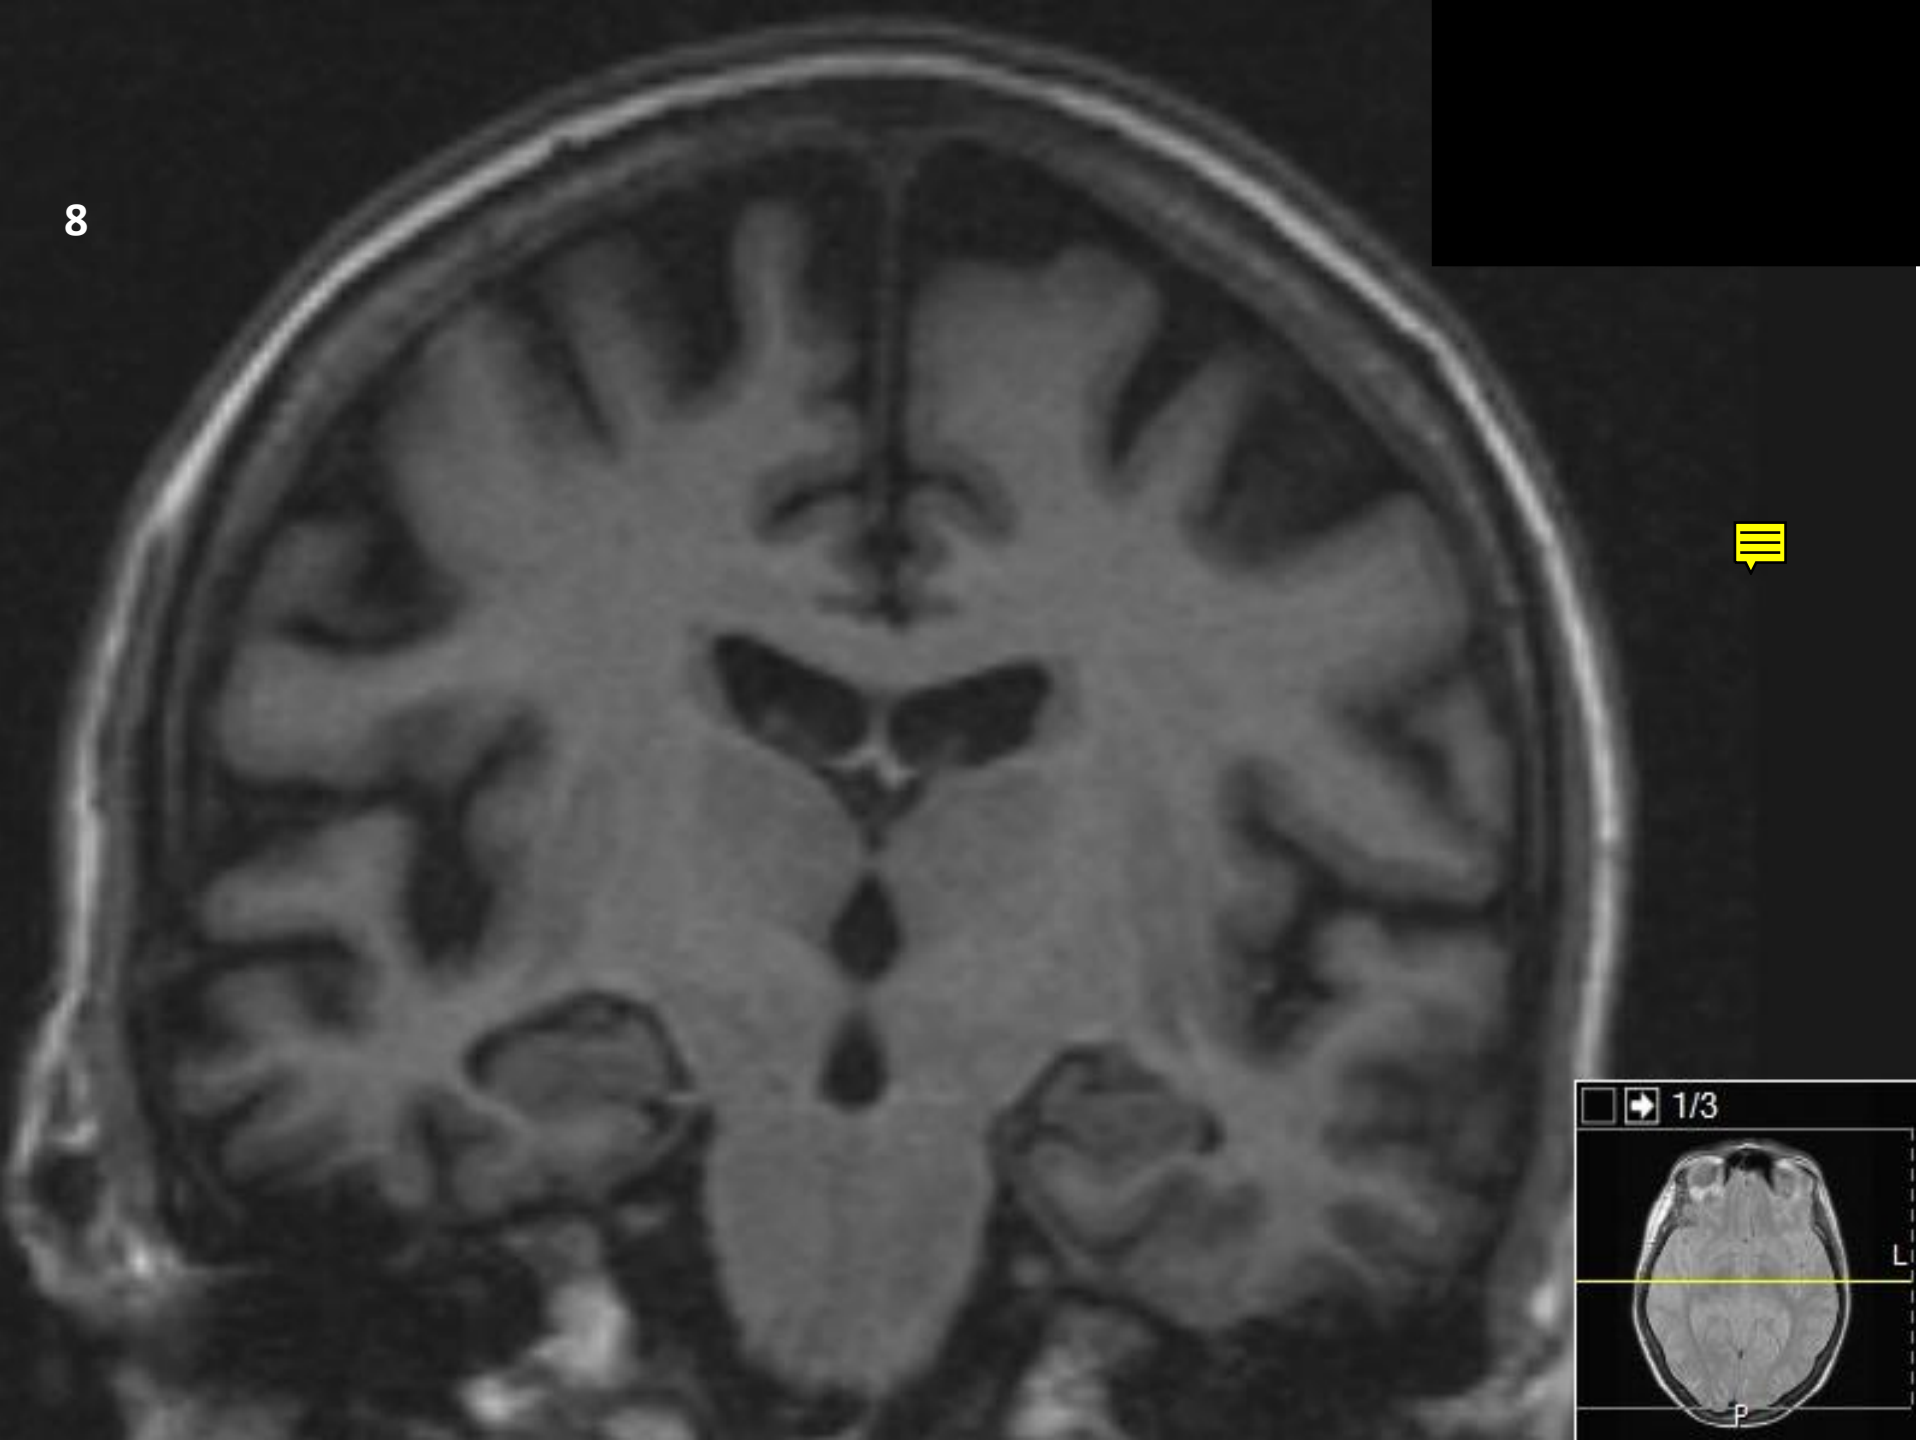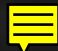

1/3

L  
P

This inset shows an axial MRI slice of the brain. A horizontal yellow line is drawn across the slice, indicating the plane of the coronal view shown in the main image. The slice is labeled with 'L' for left and 'P' for posterior.



9

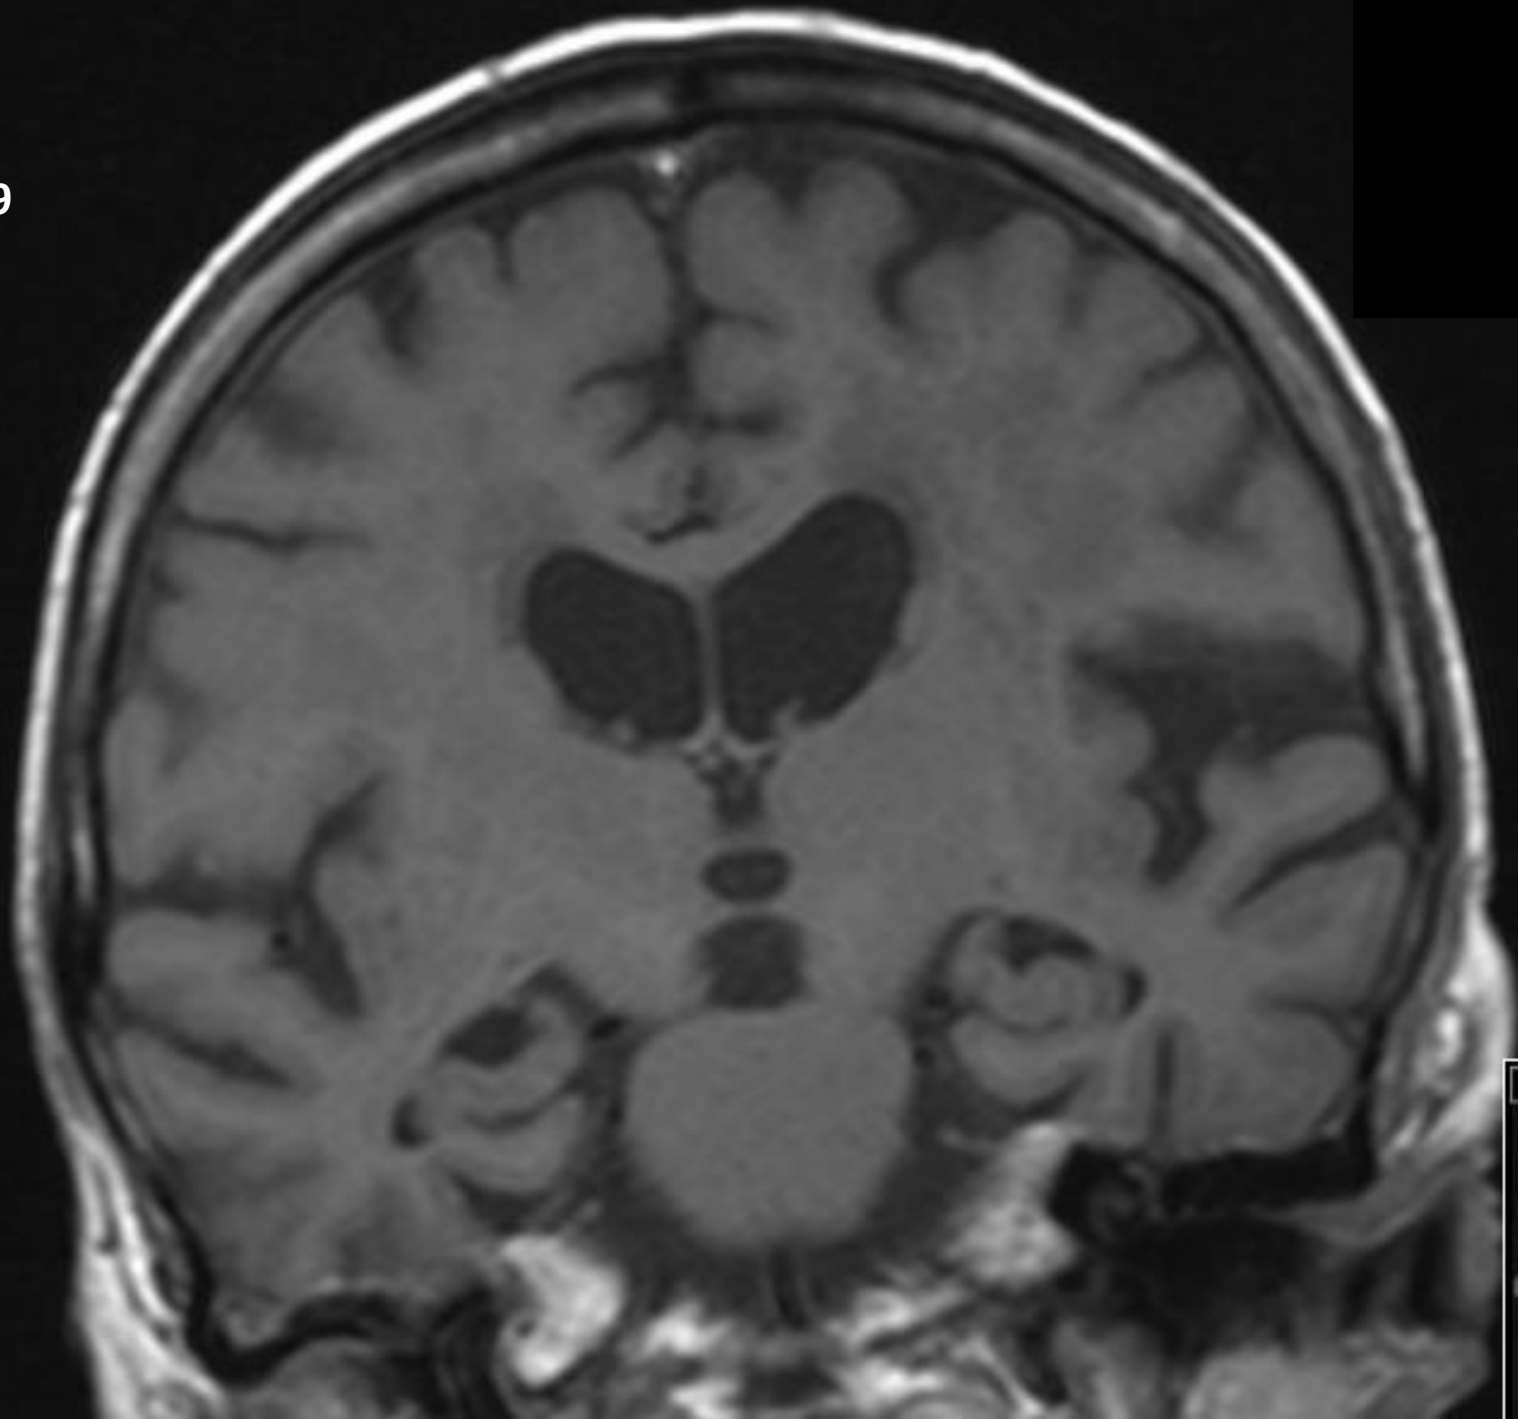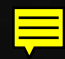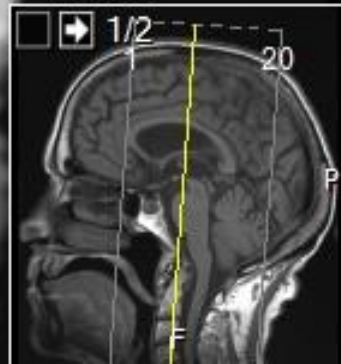

10

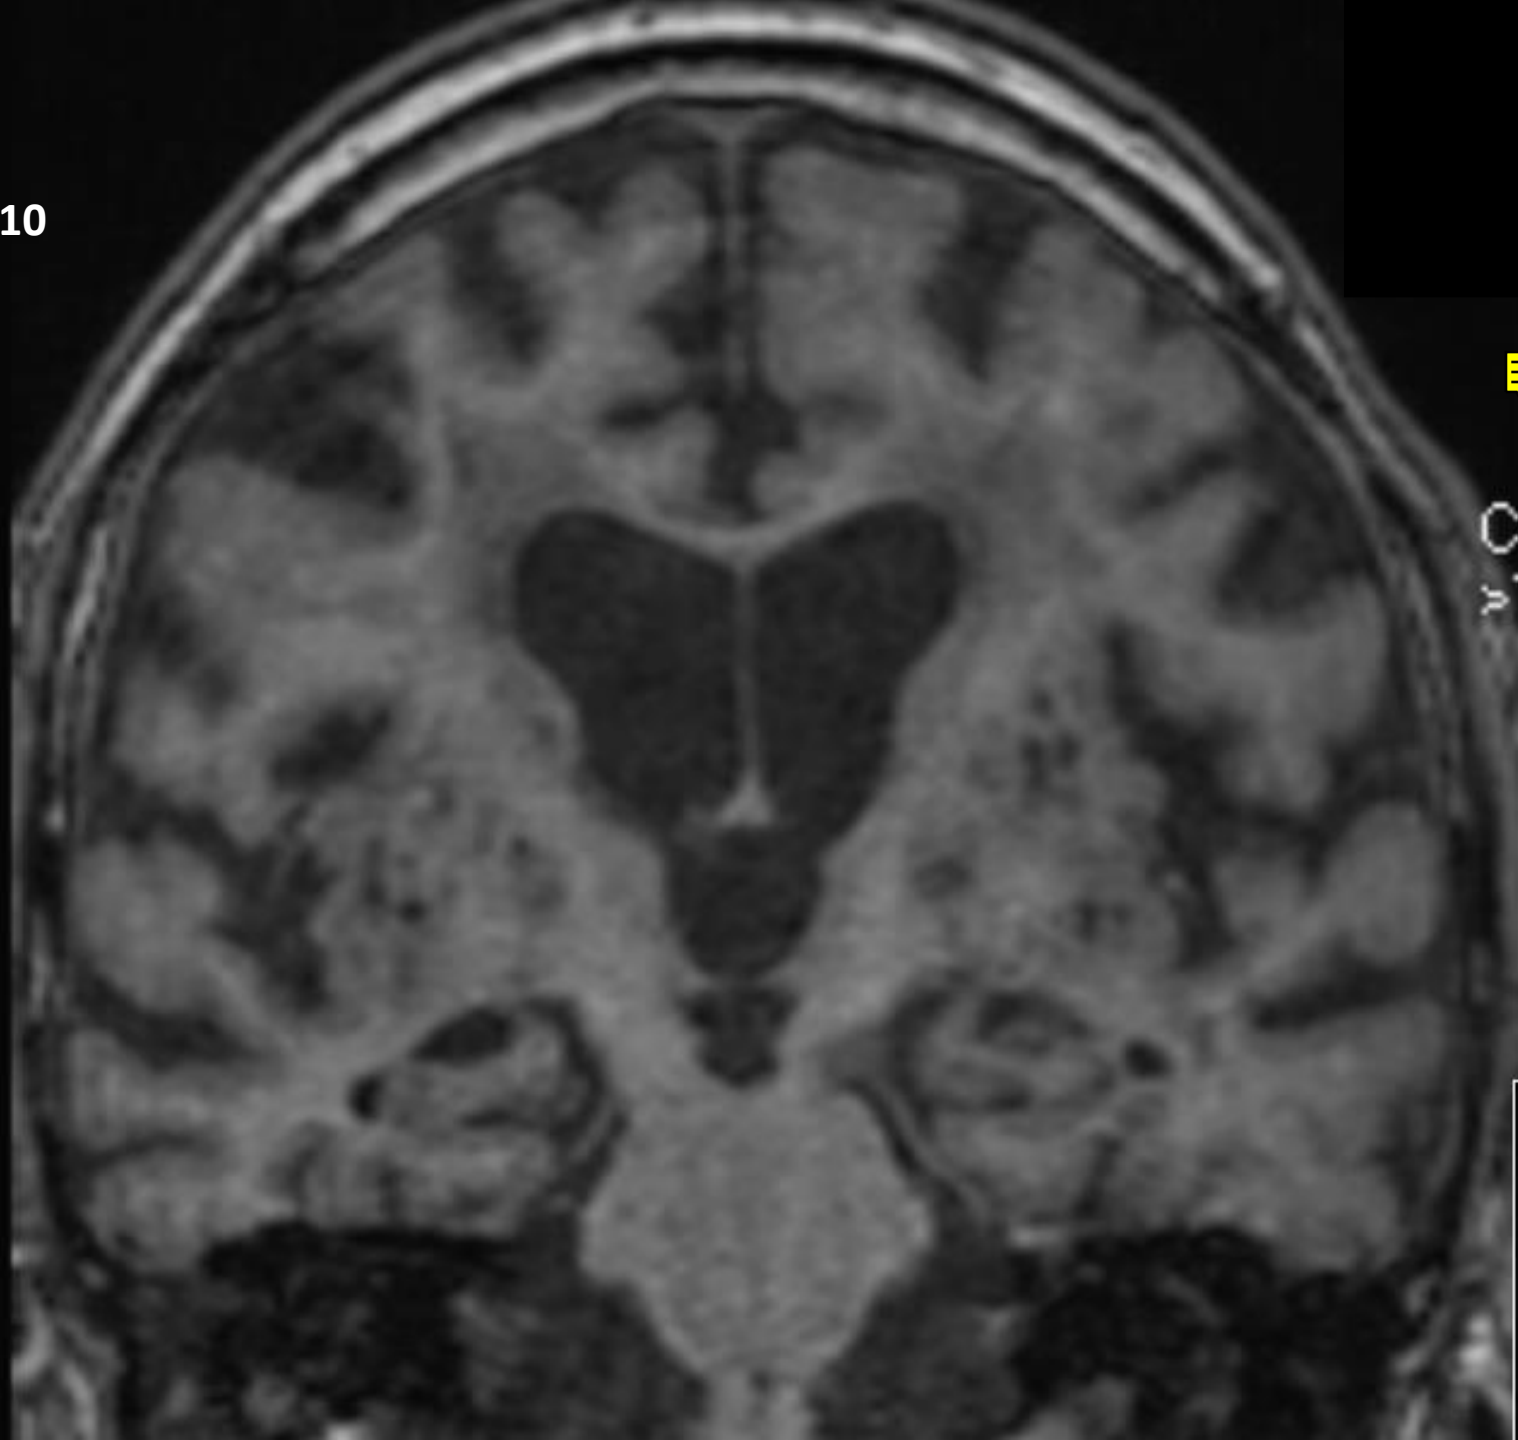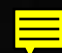

Cor>Sag -10  
>Tra -6

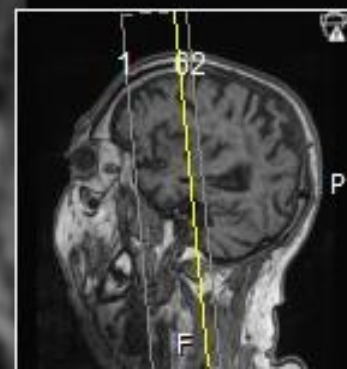

11

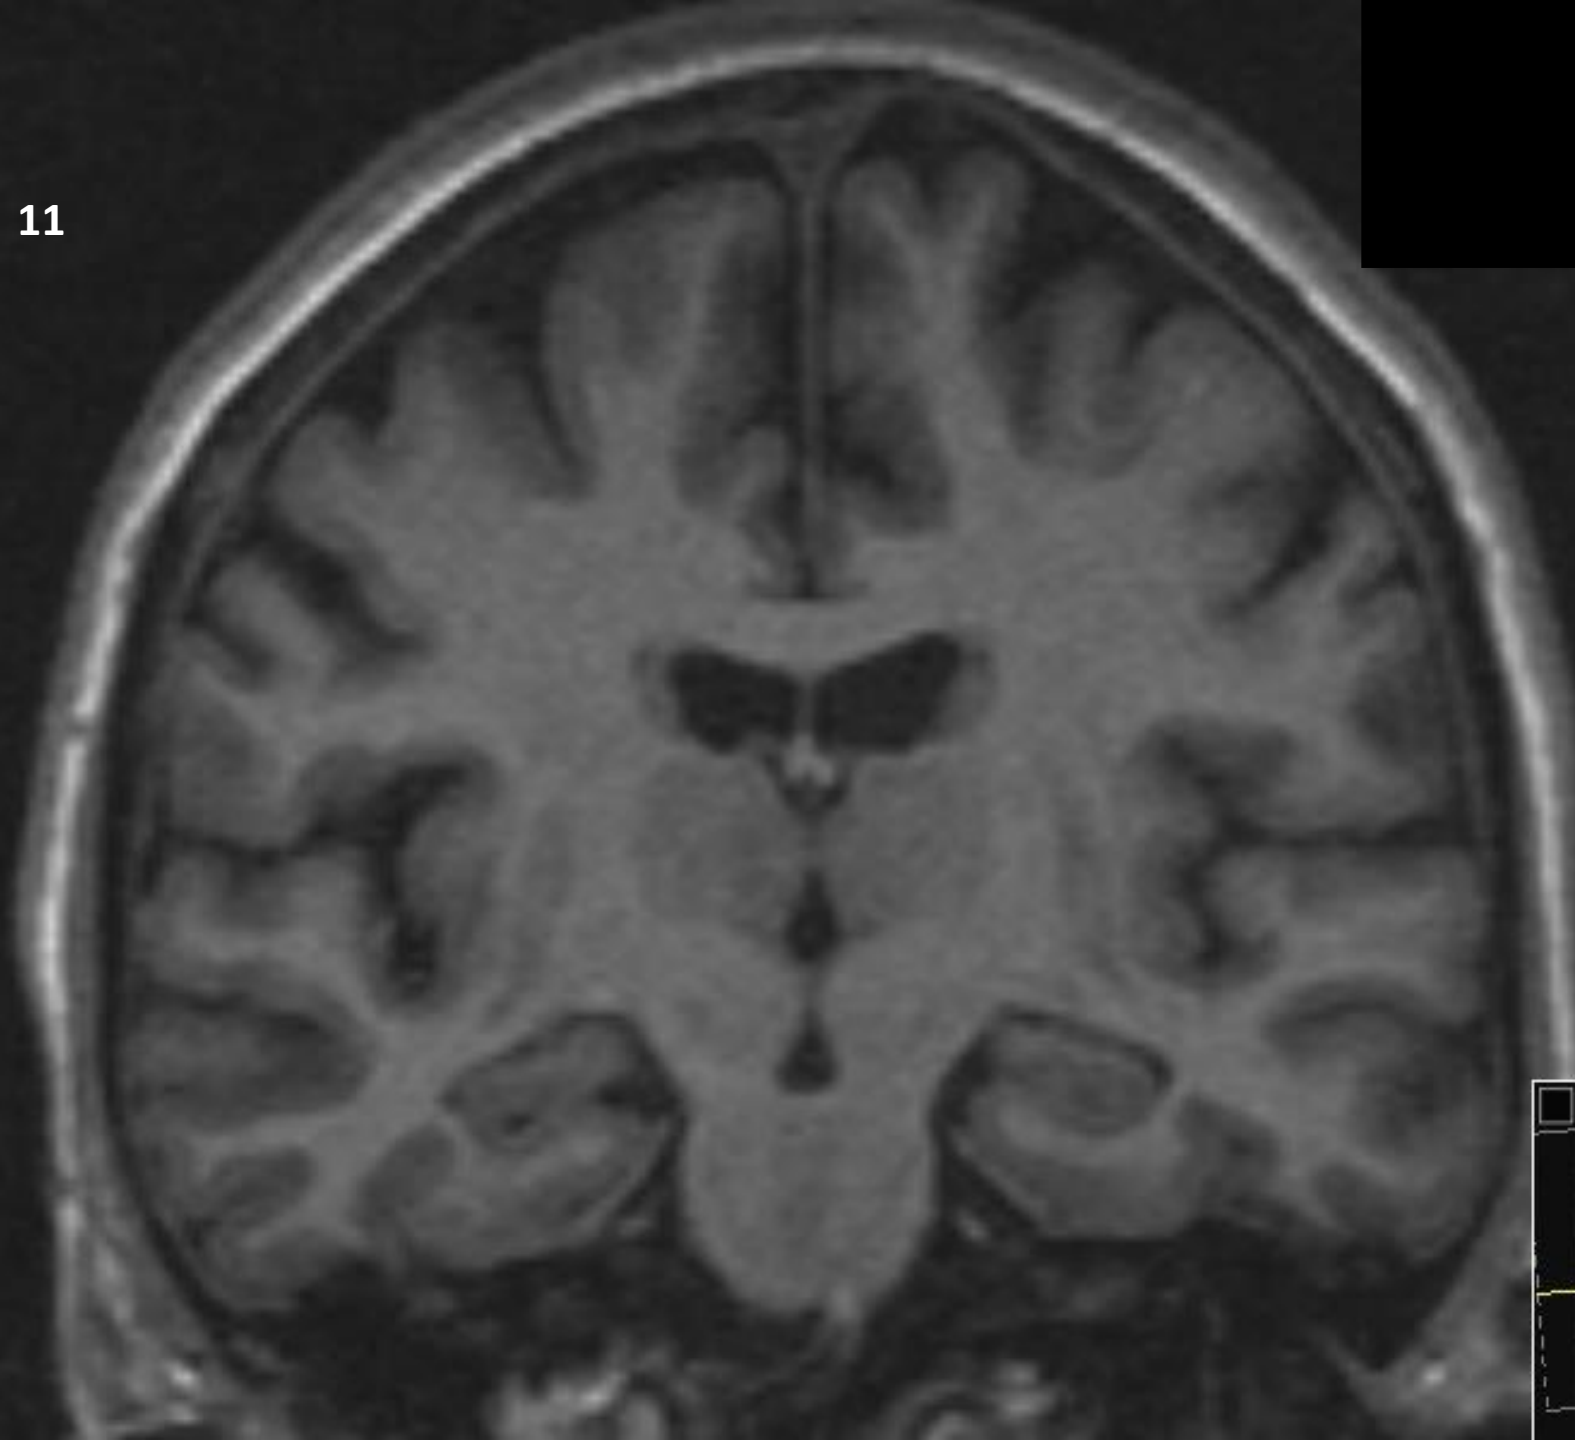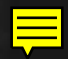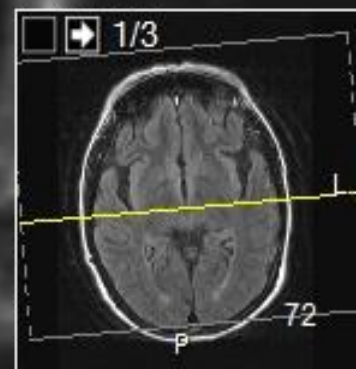

12

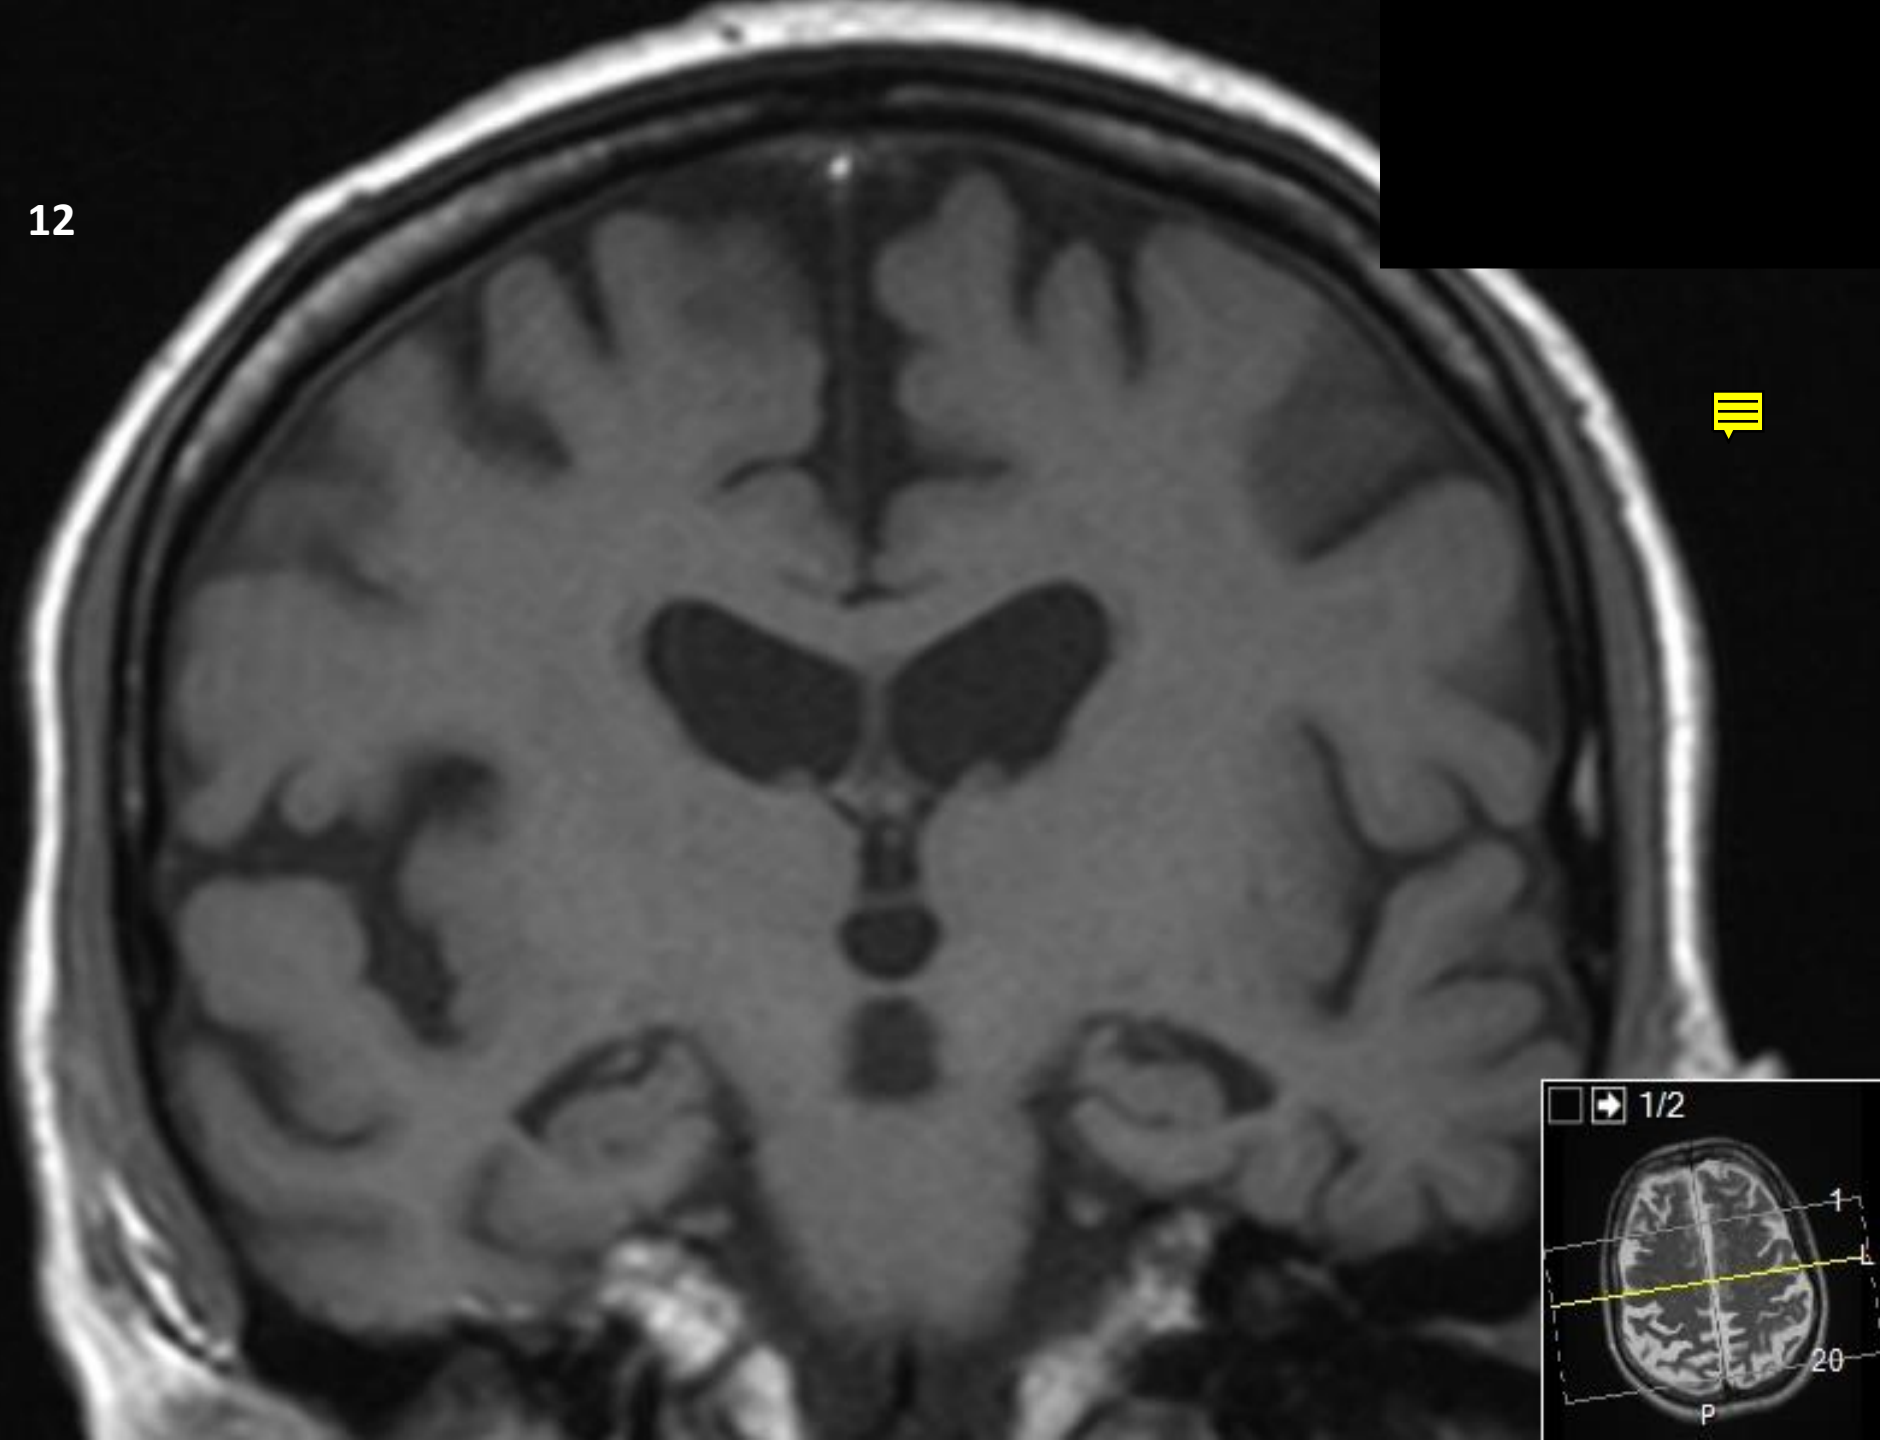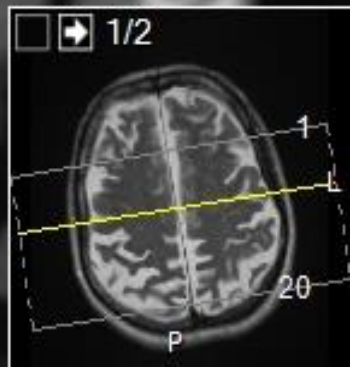

13

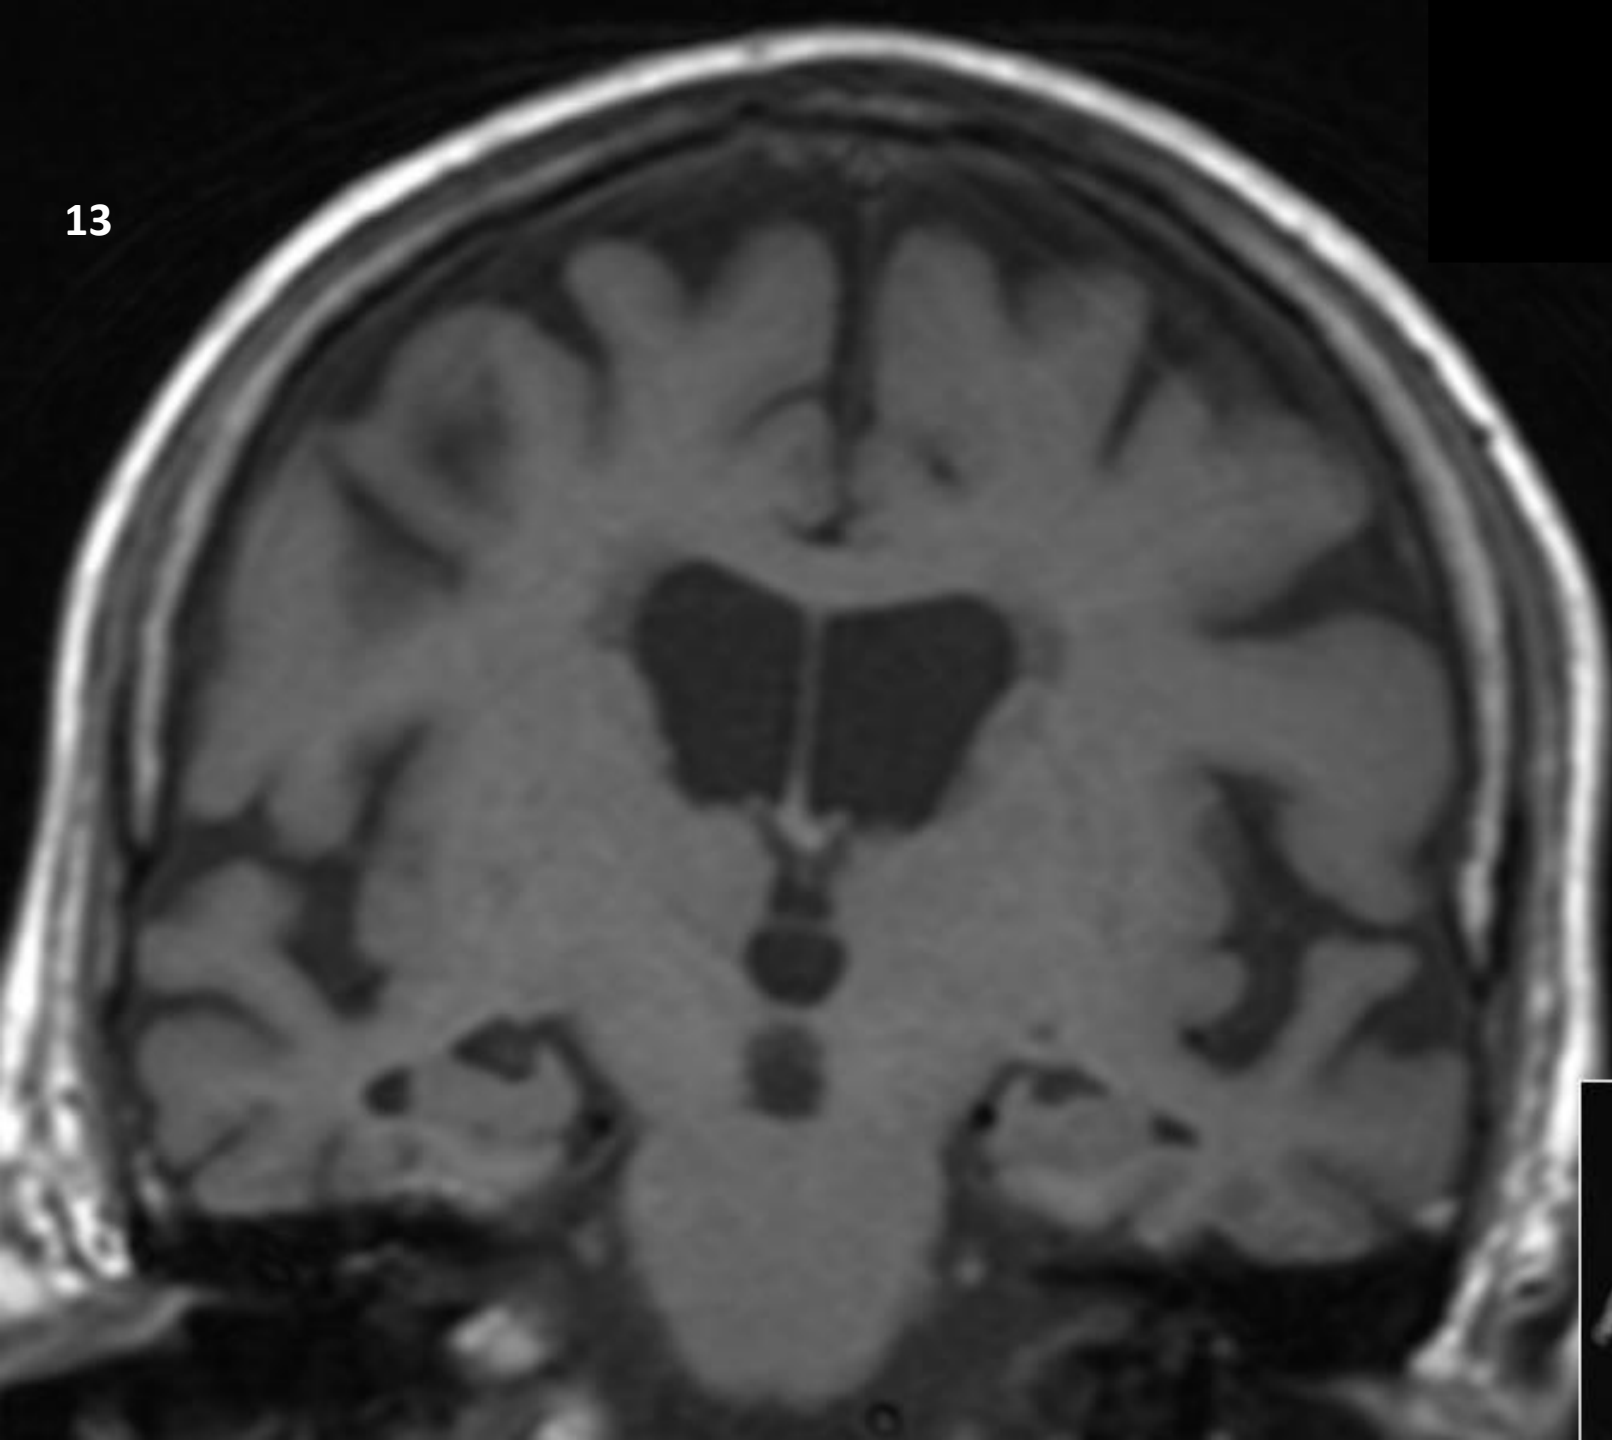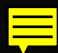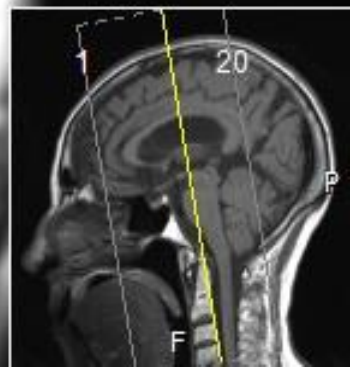

14

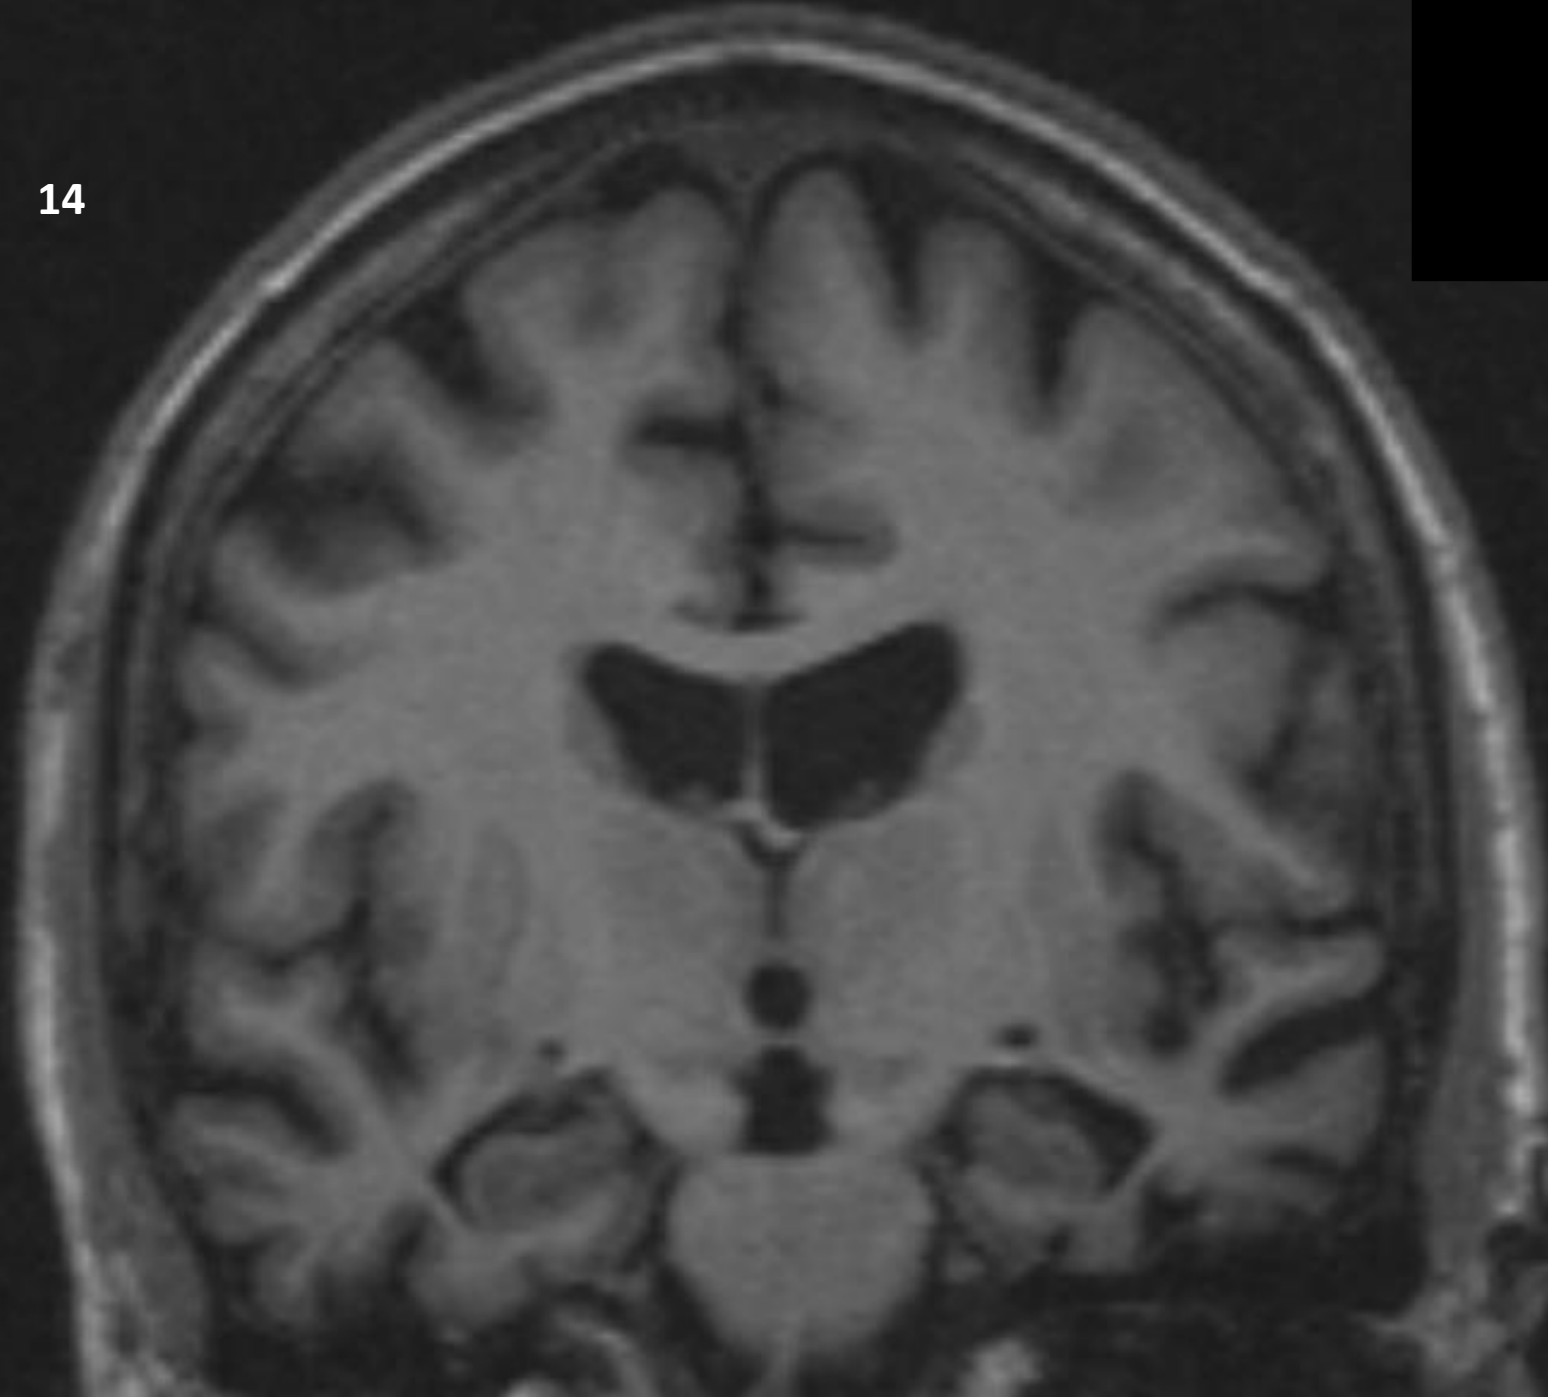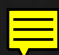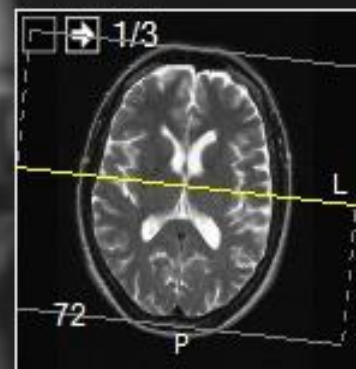

15

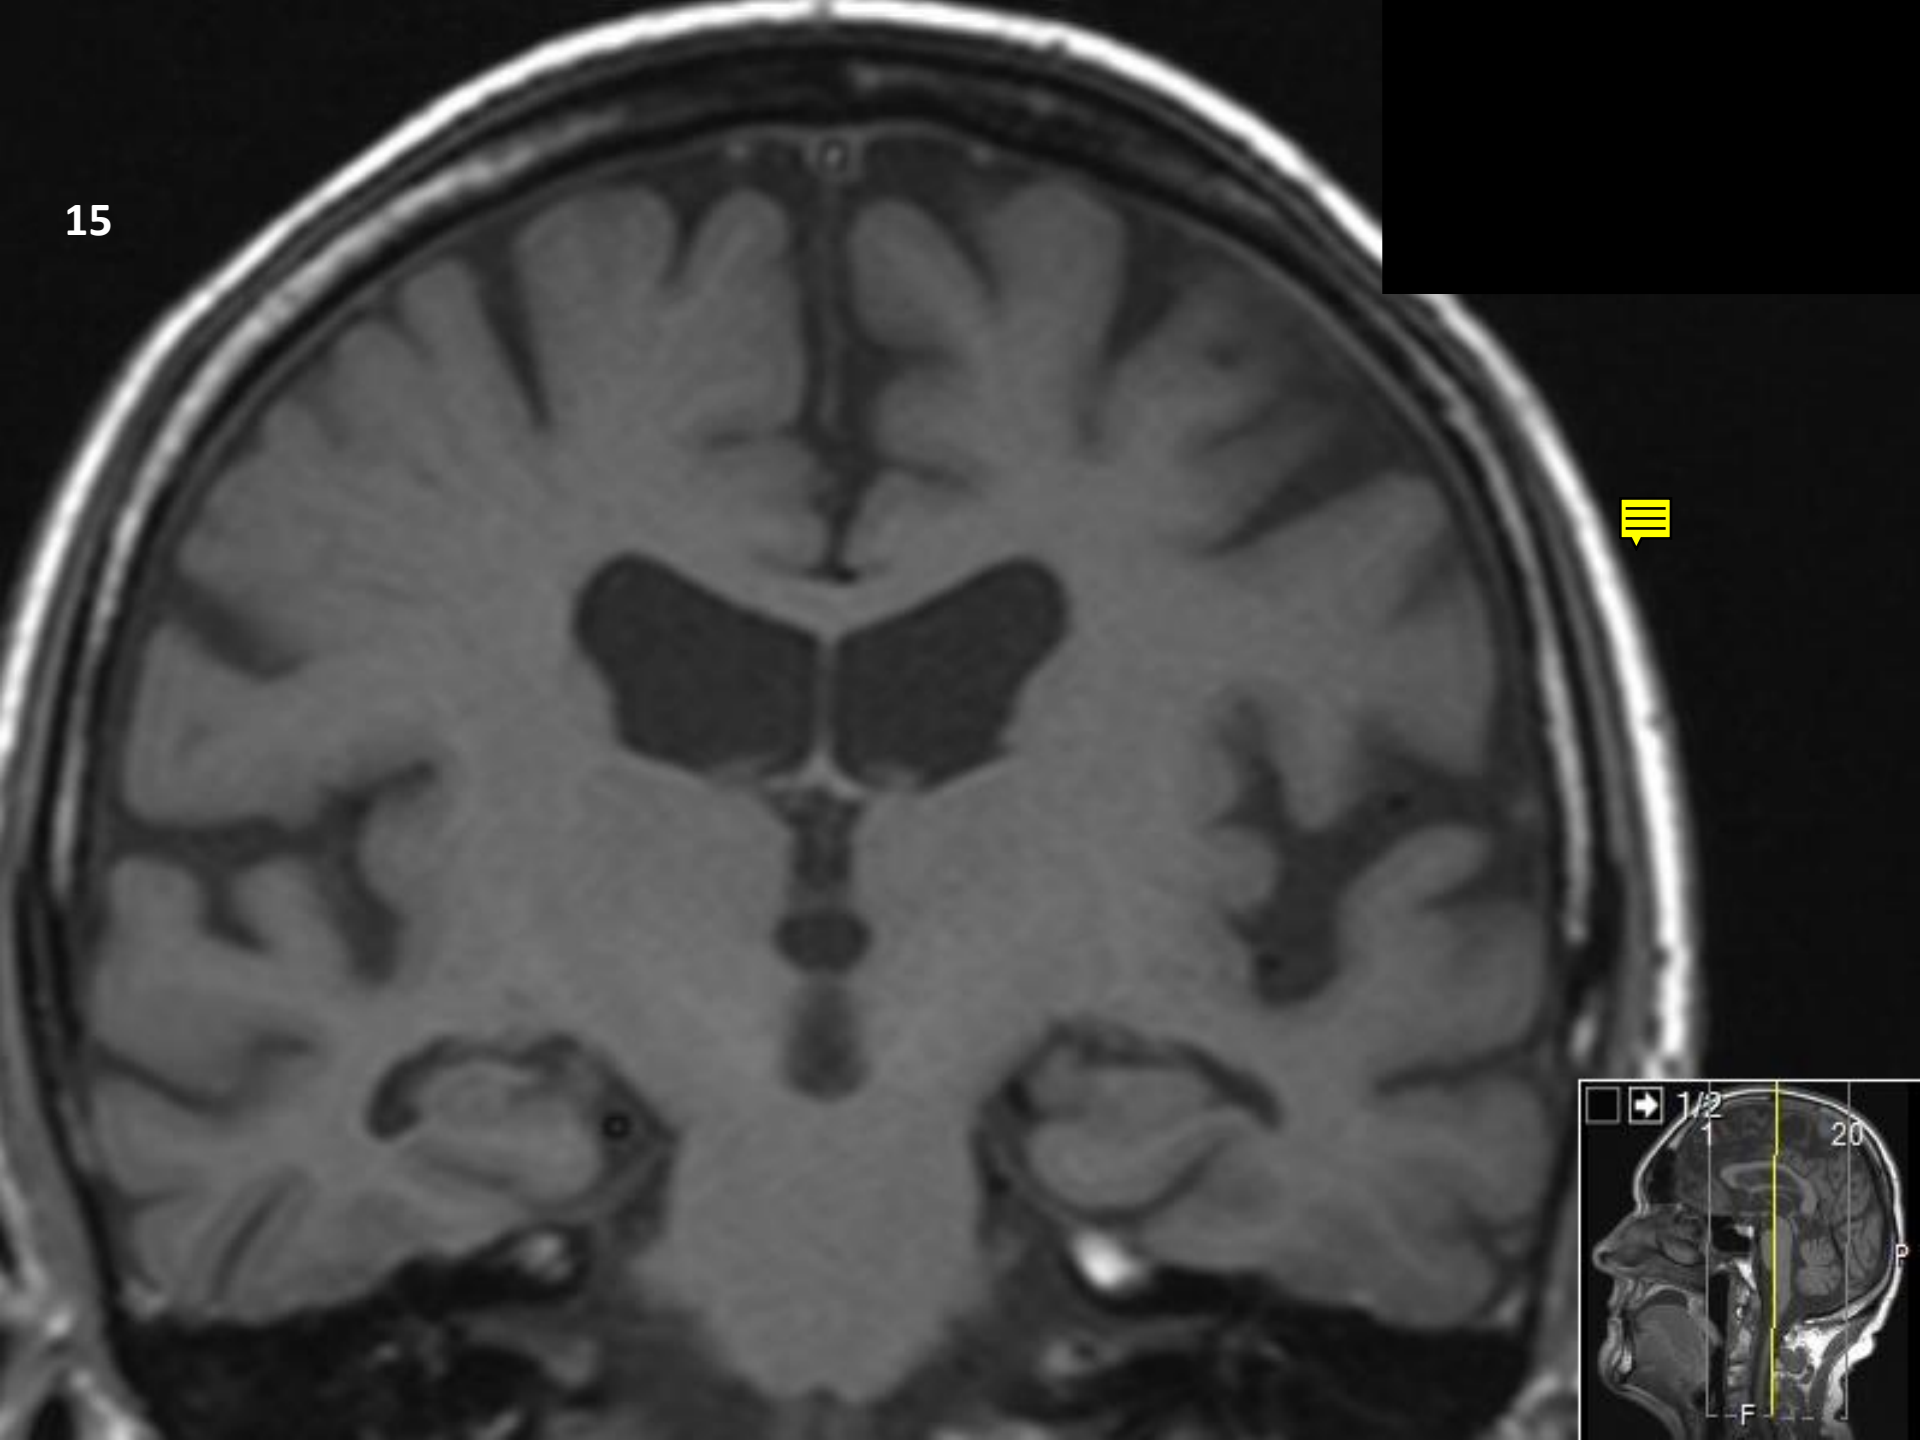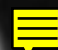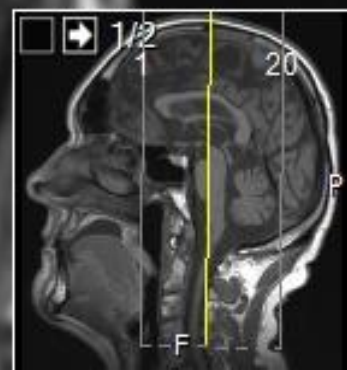

16

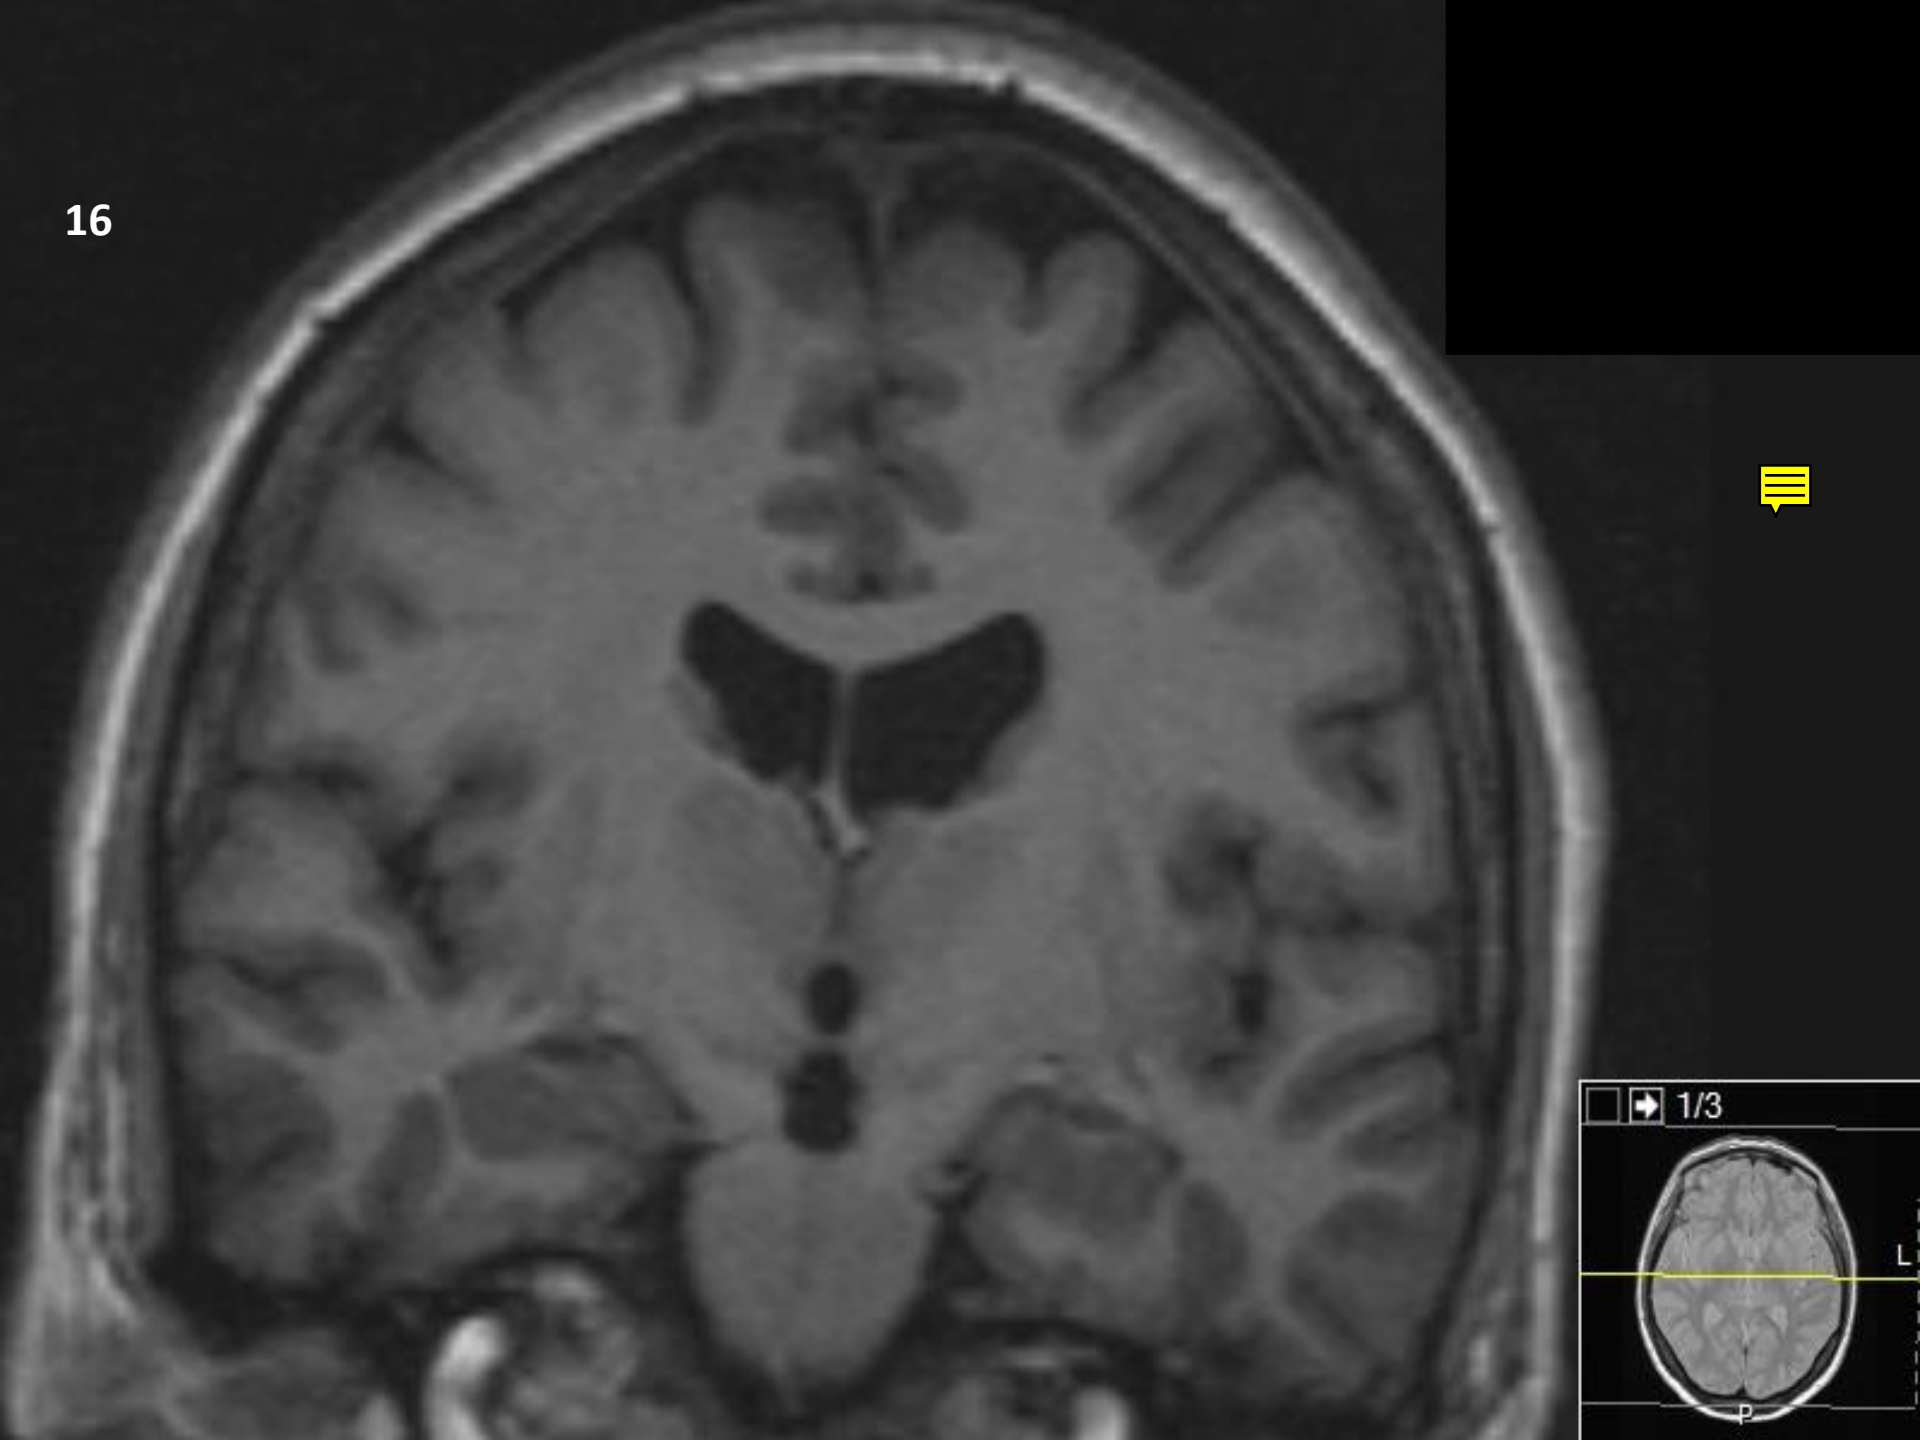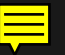

1/3

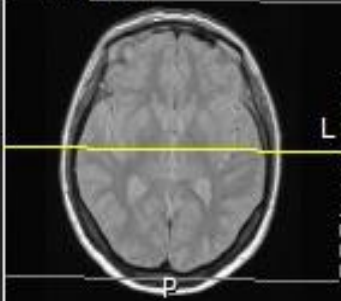



17

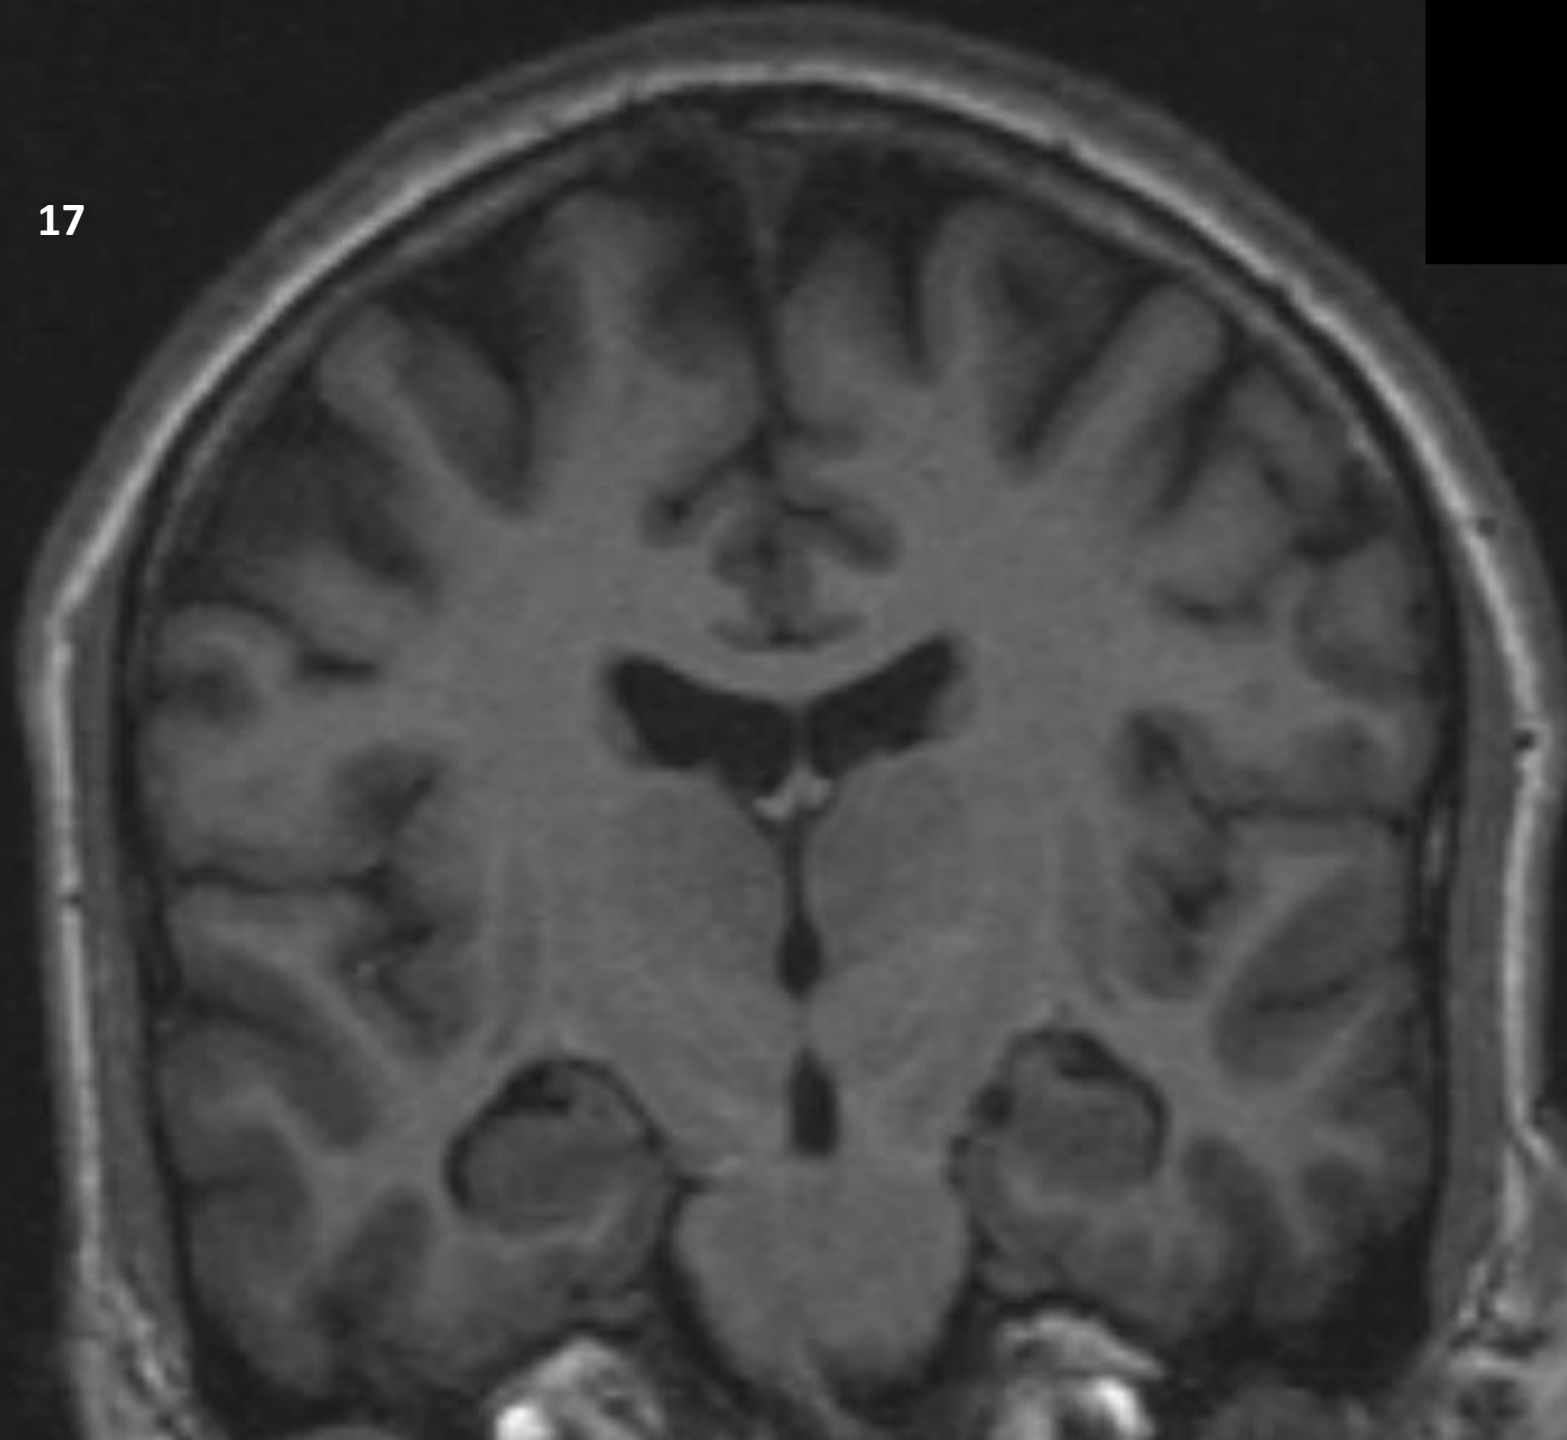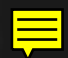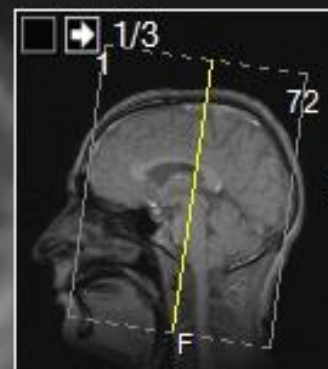

18

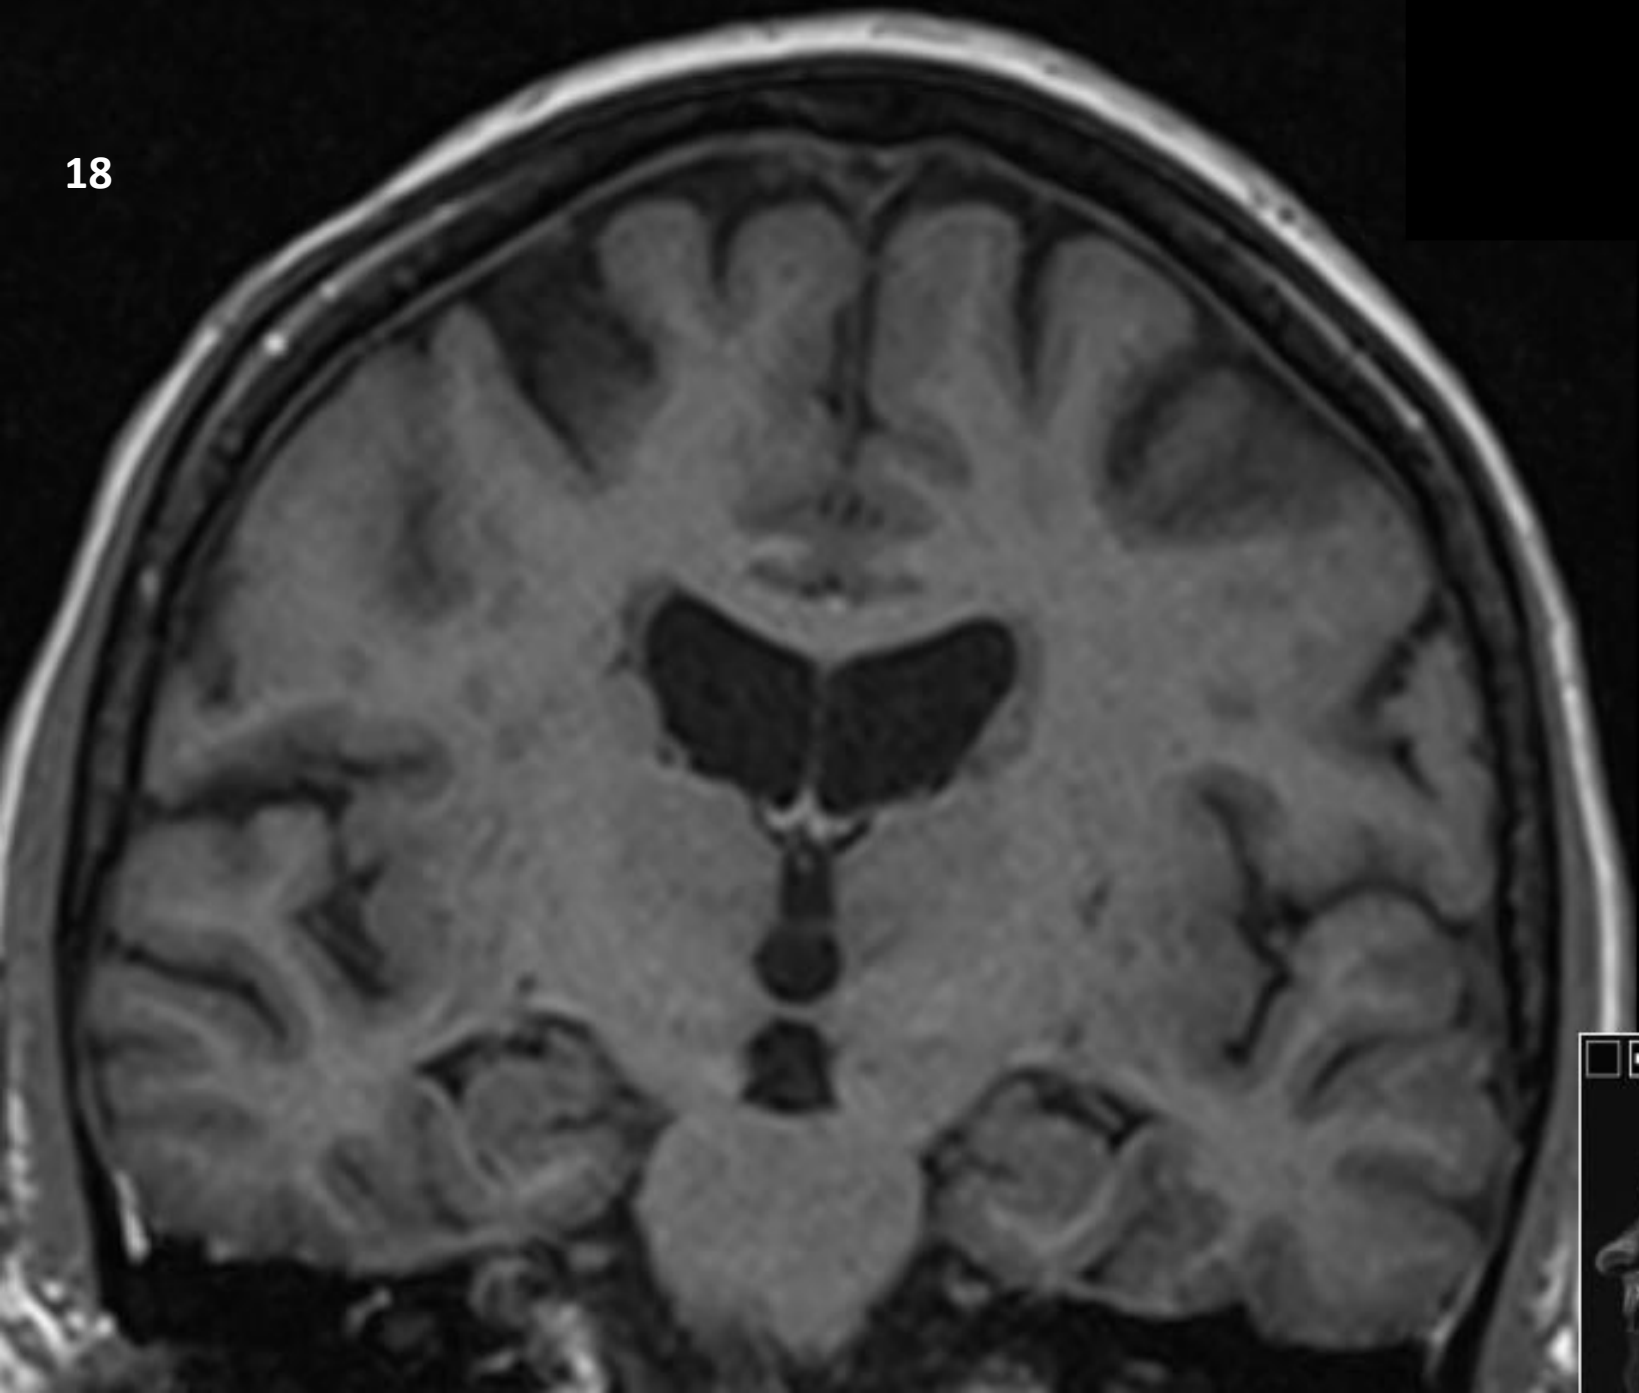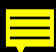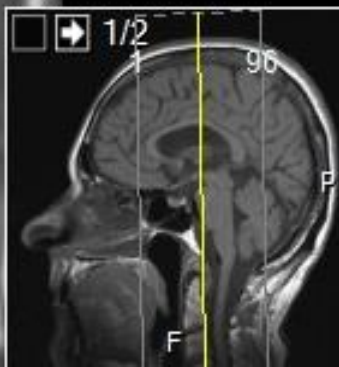

19

Cor>Tra 4  
>Sag -1

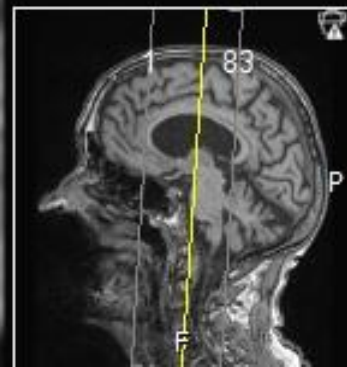

20

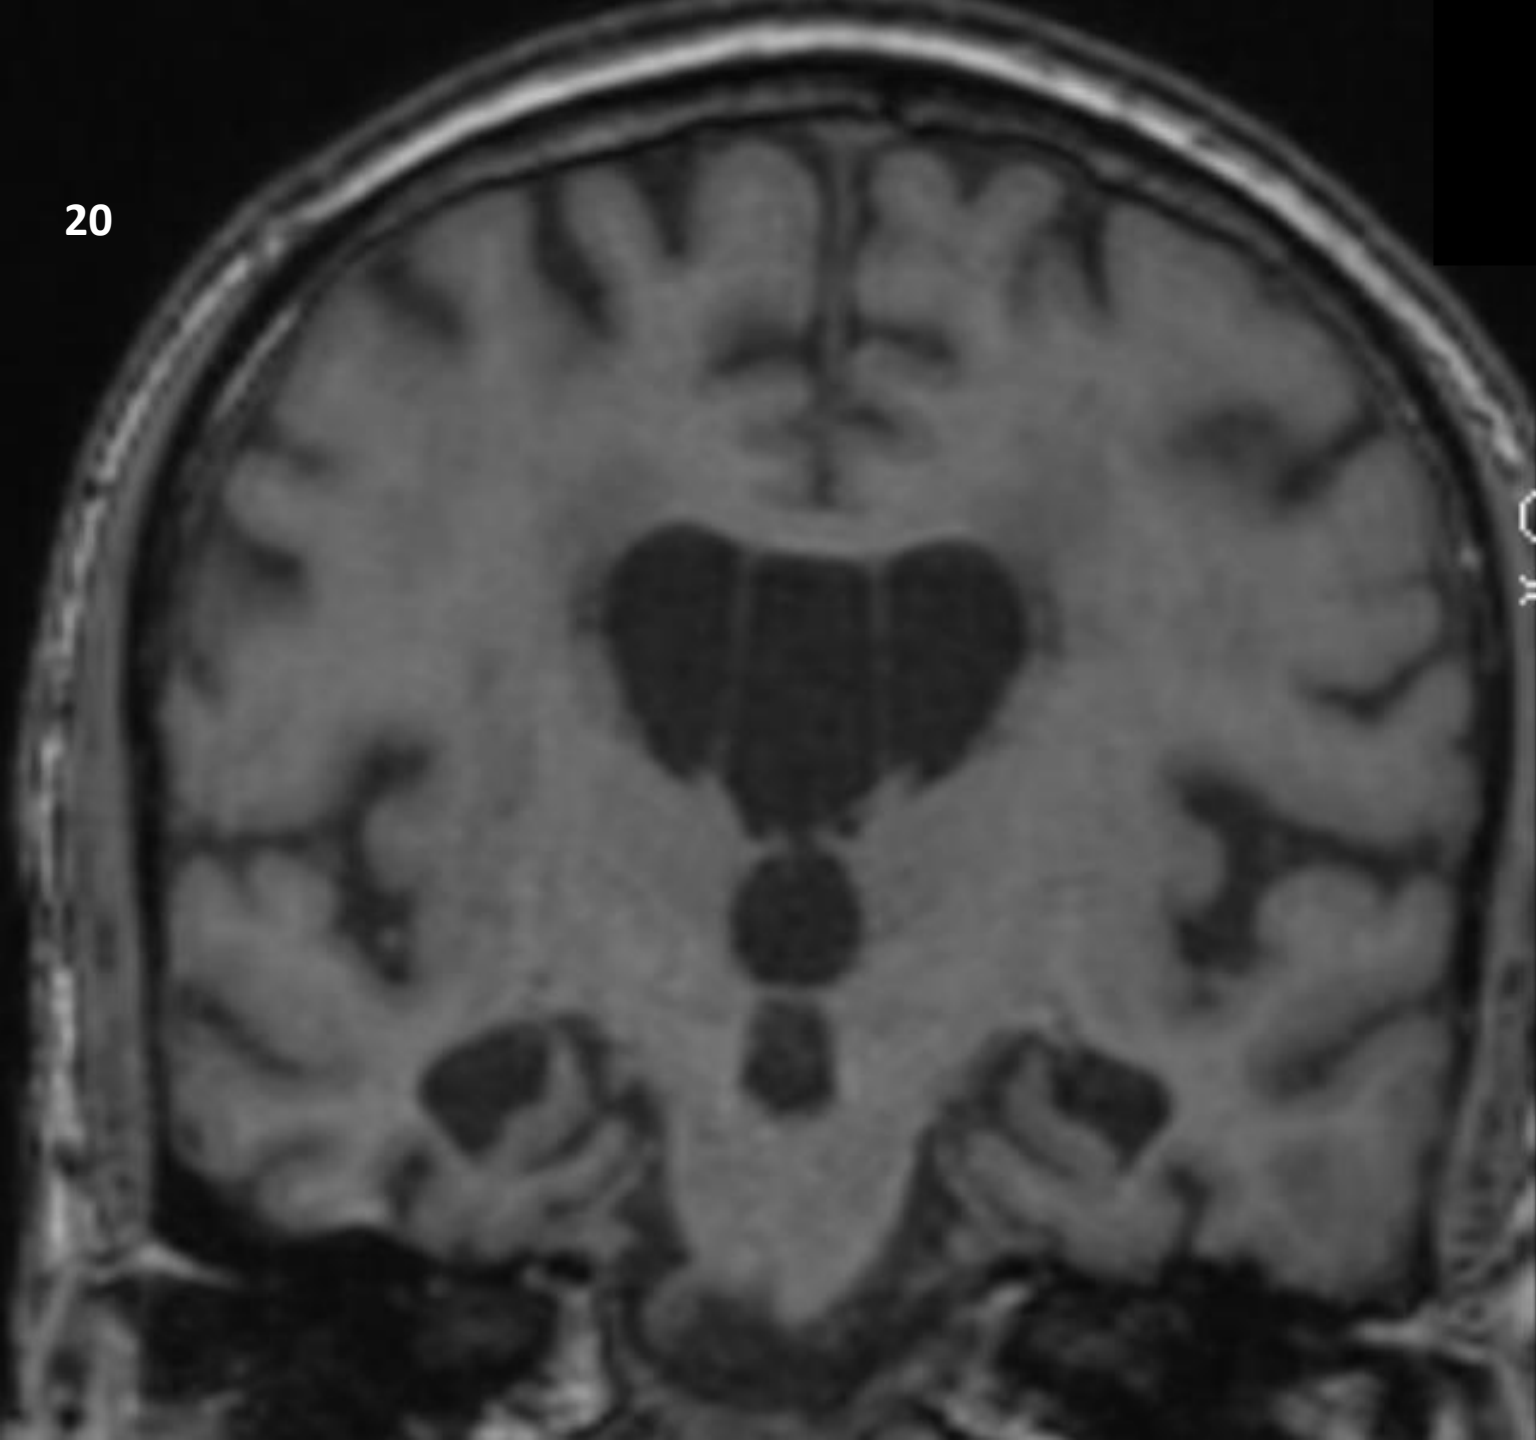

Cor>Sag 1  
>Tra 1

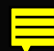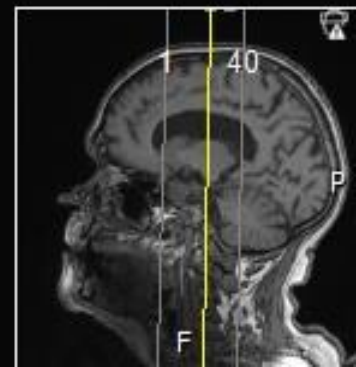

Supplement: 13244_2016_521_MOESM3_ESM.pdf [file 13244_2016_521_MOESM3_ESM.pdf]
