# Supplementary material for: Imaging biomarkers of dementia: recommended visual rating scales with teaching cases
Source: PubMed Central journal article supplement (PMC5265189; doi:10.1007/s13244-016-0521-6), 2016-12-21

1

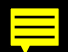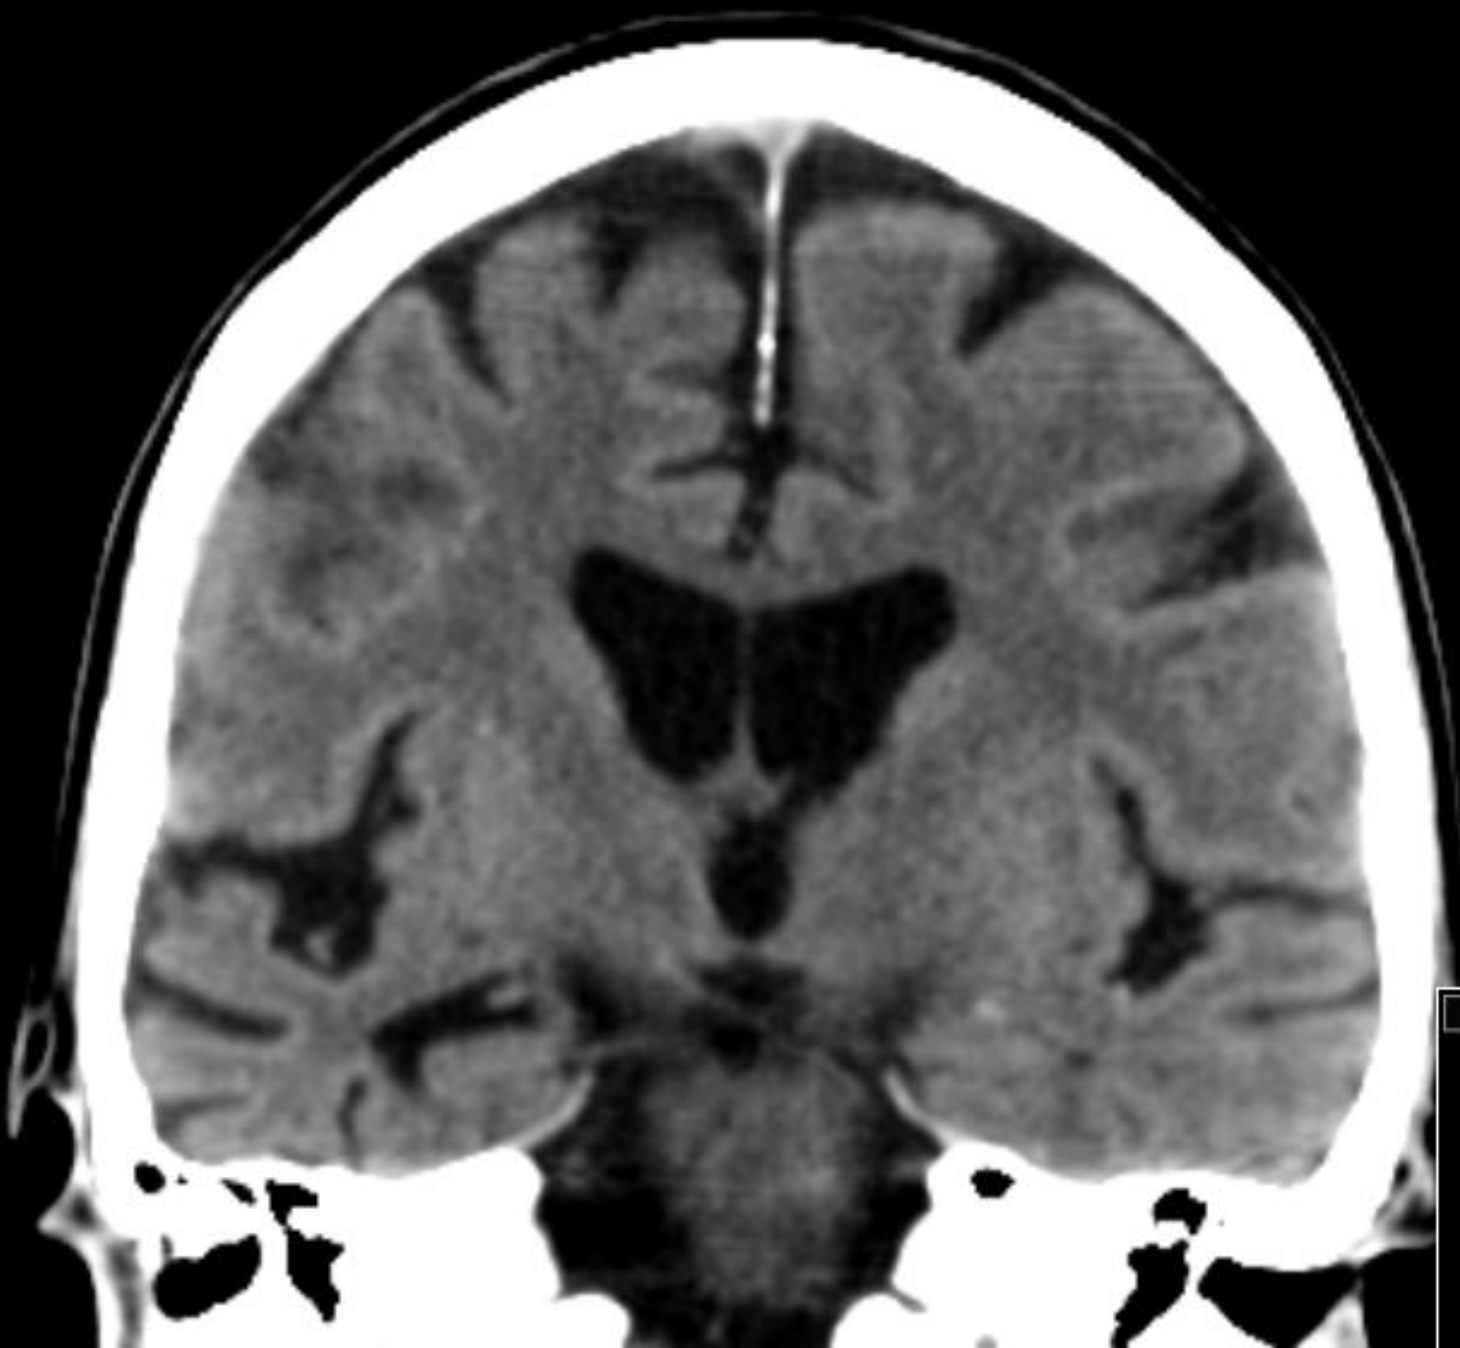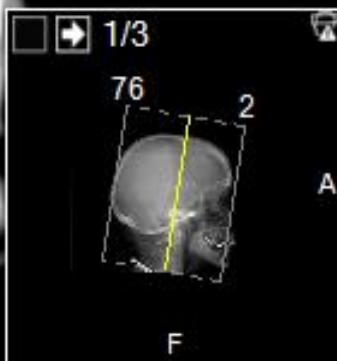

2

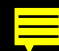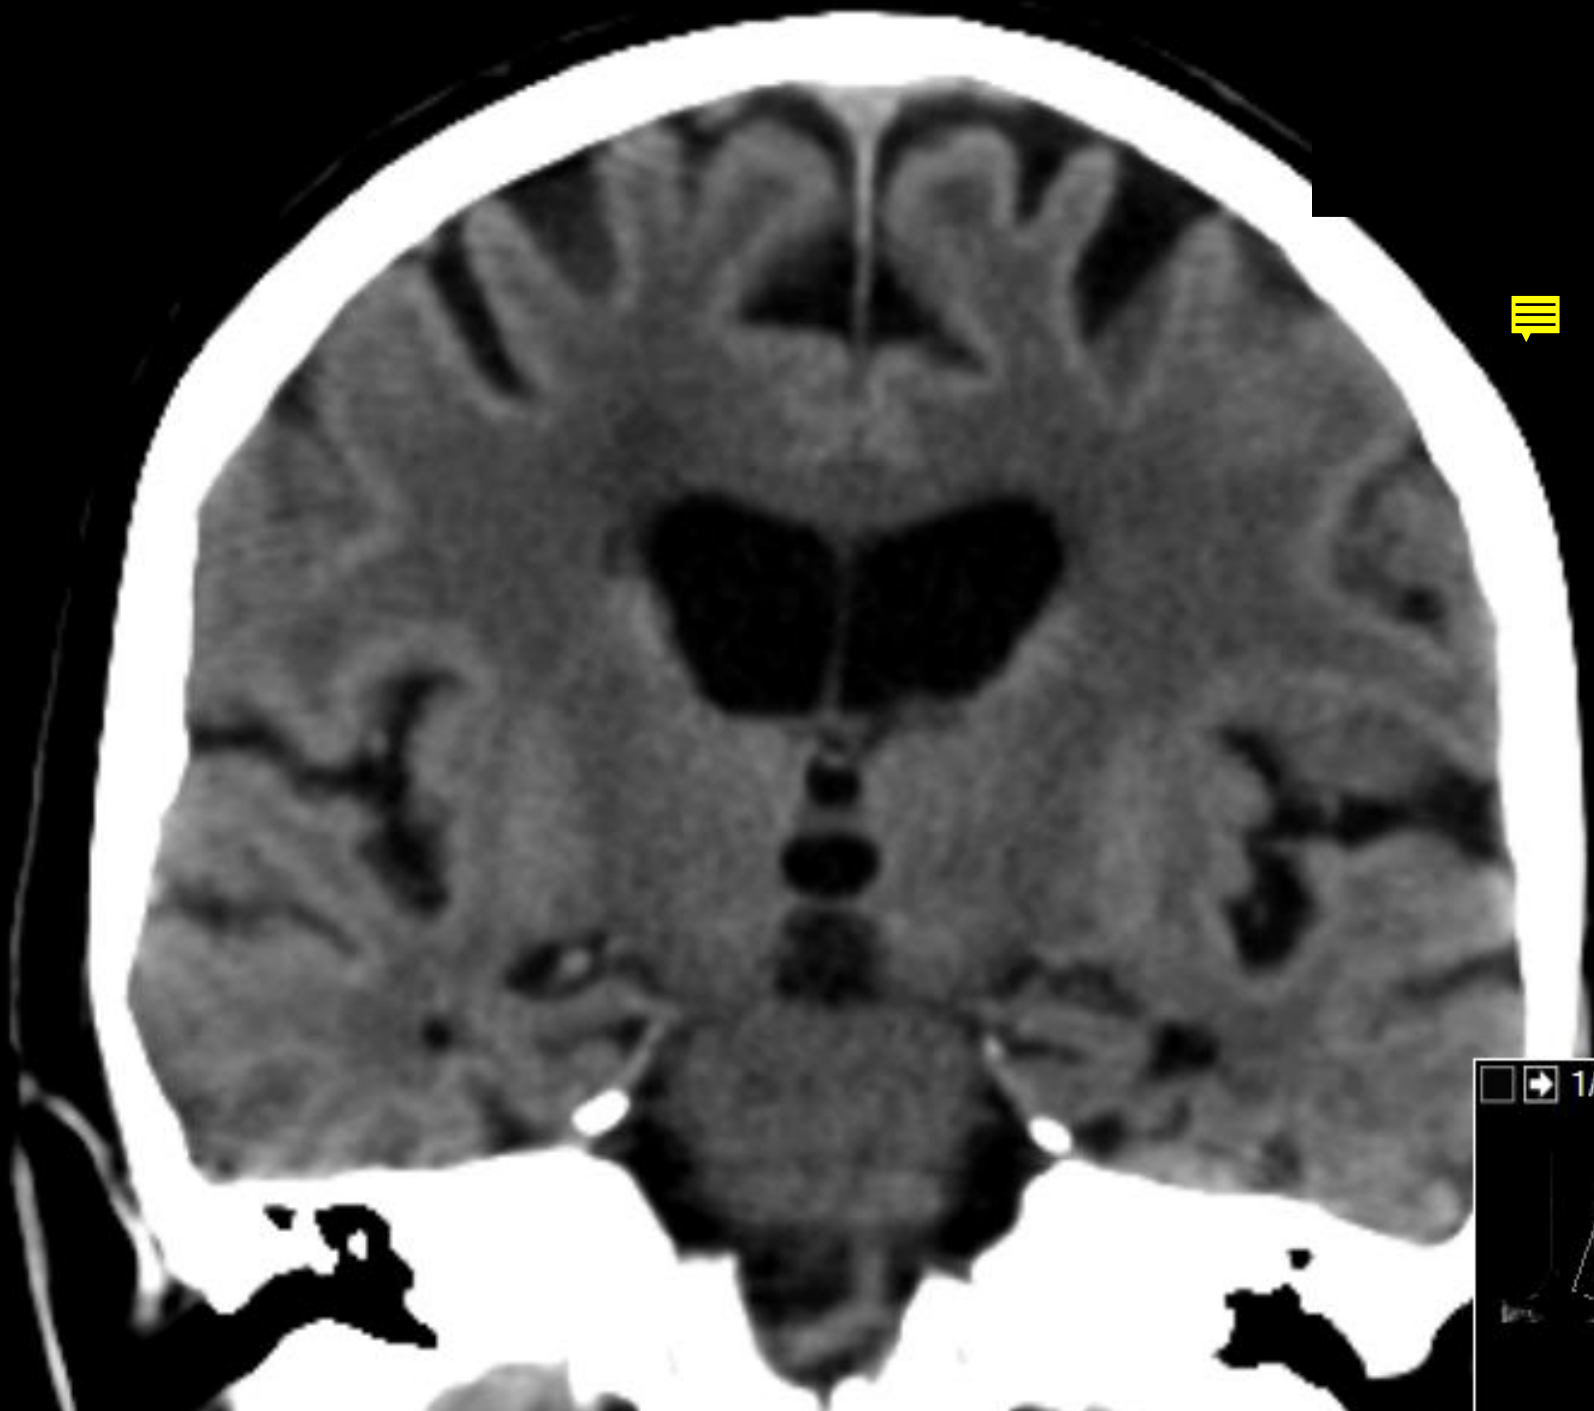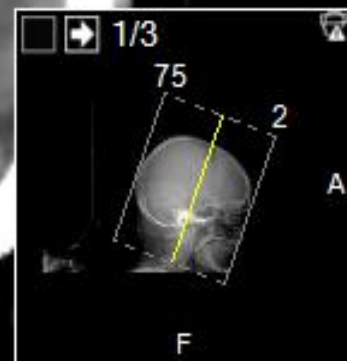

3

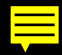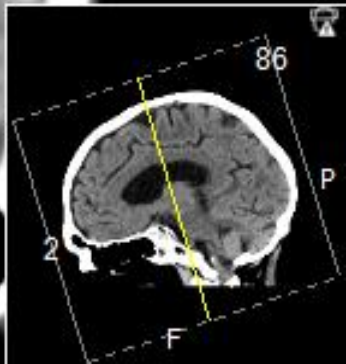

4

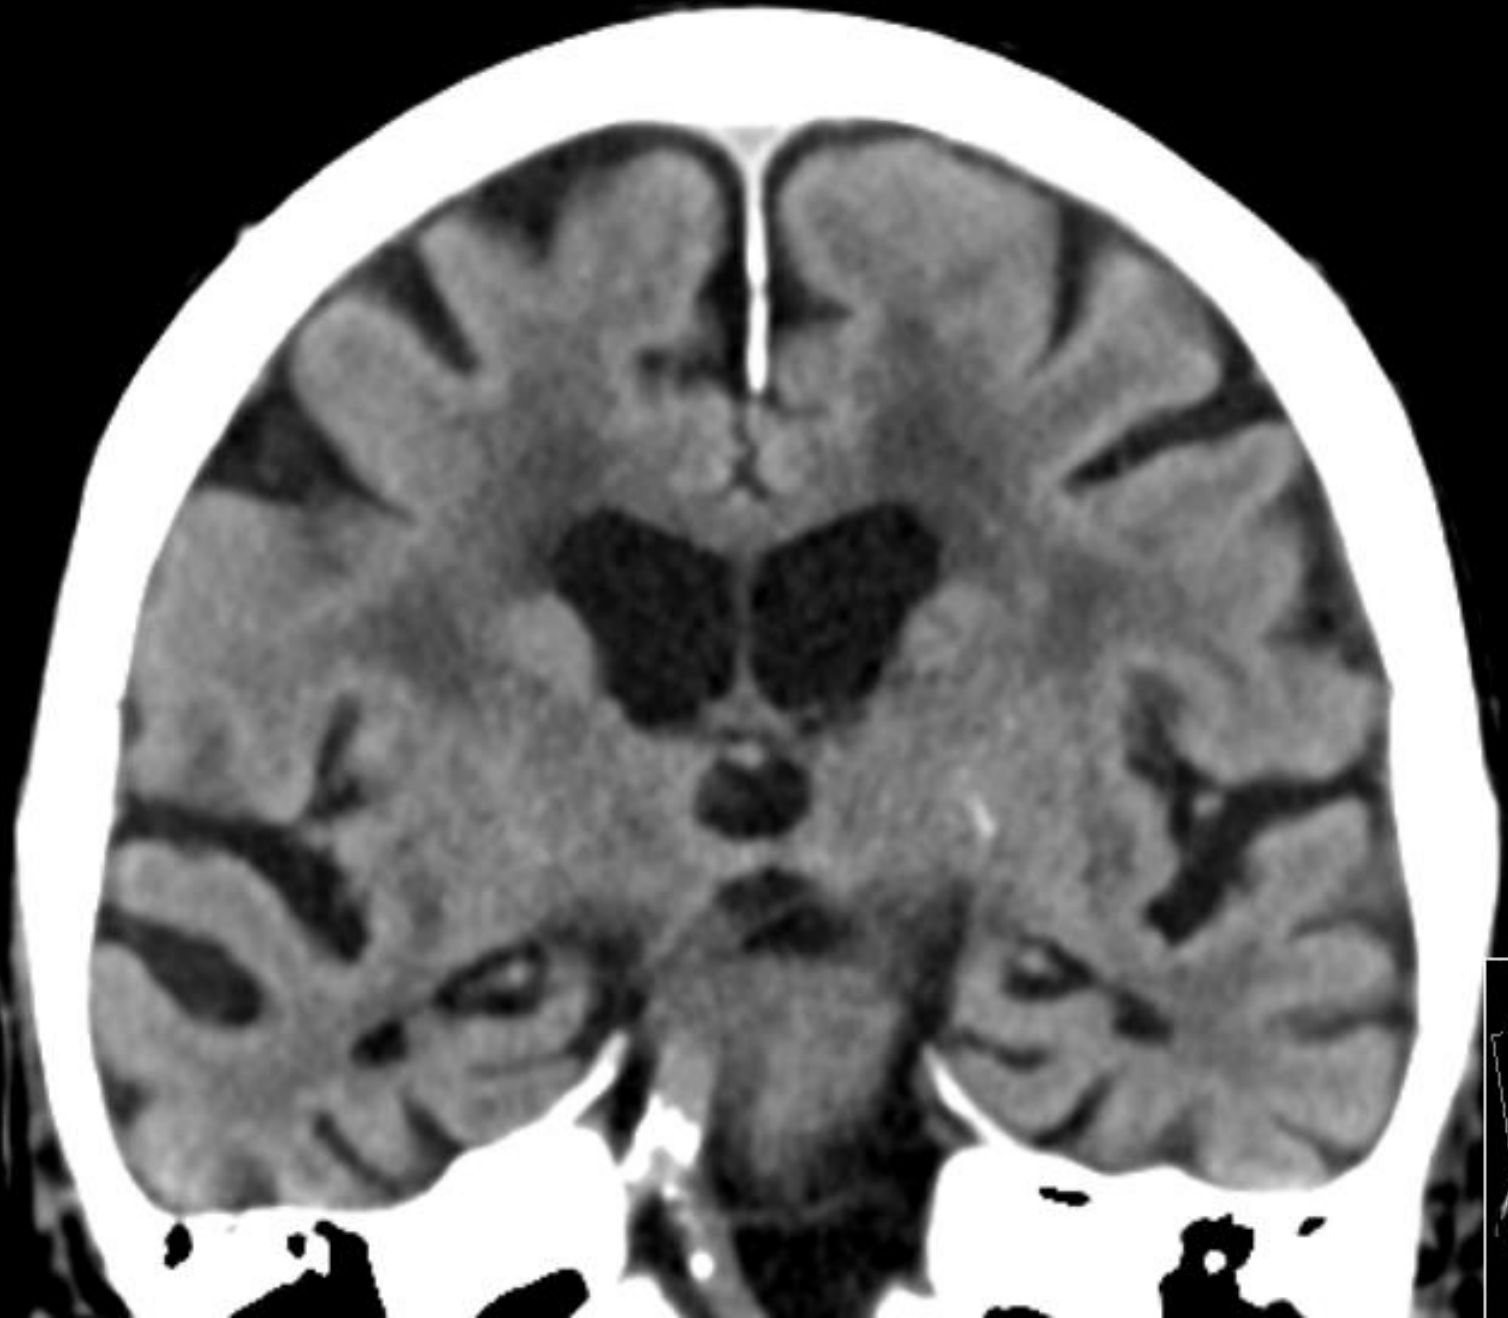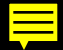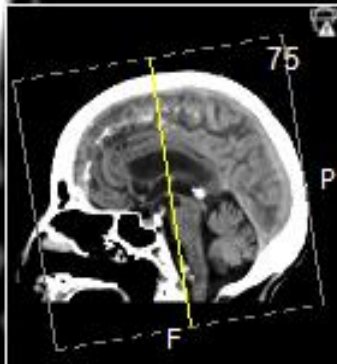

5

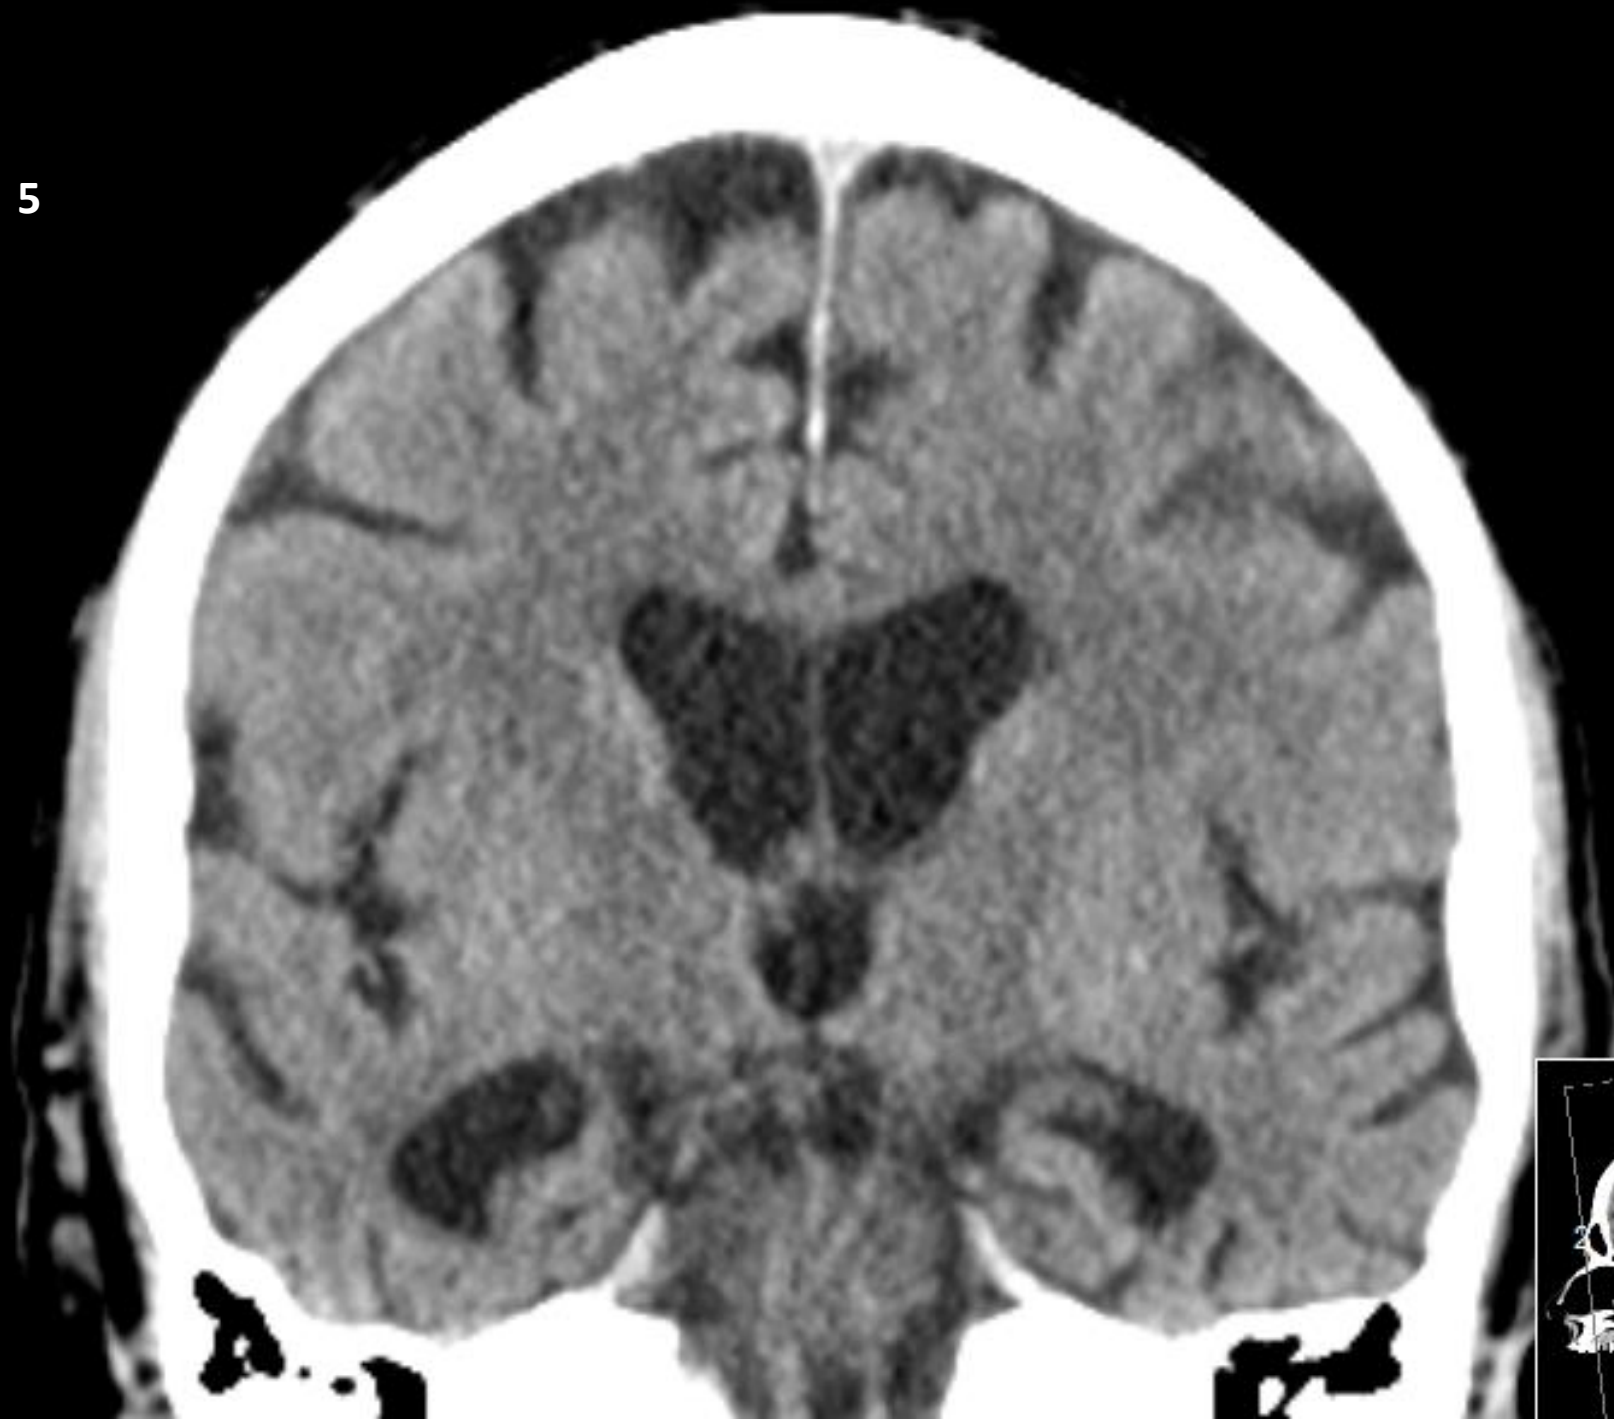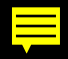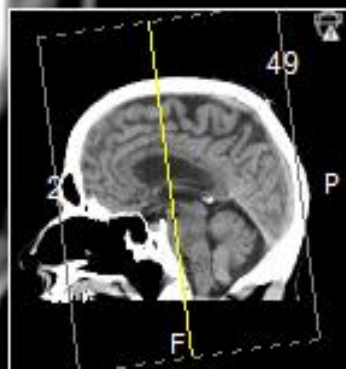

6

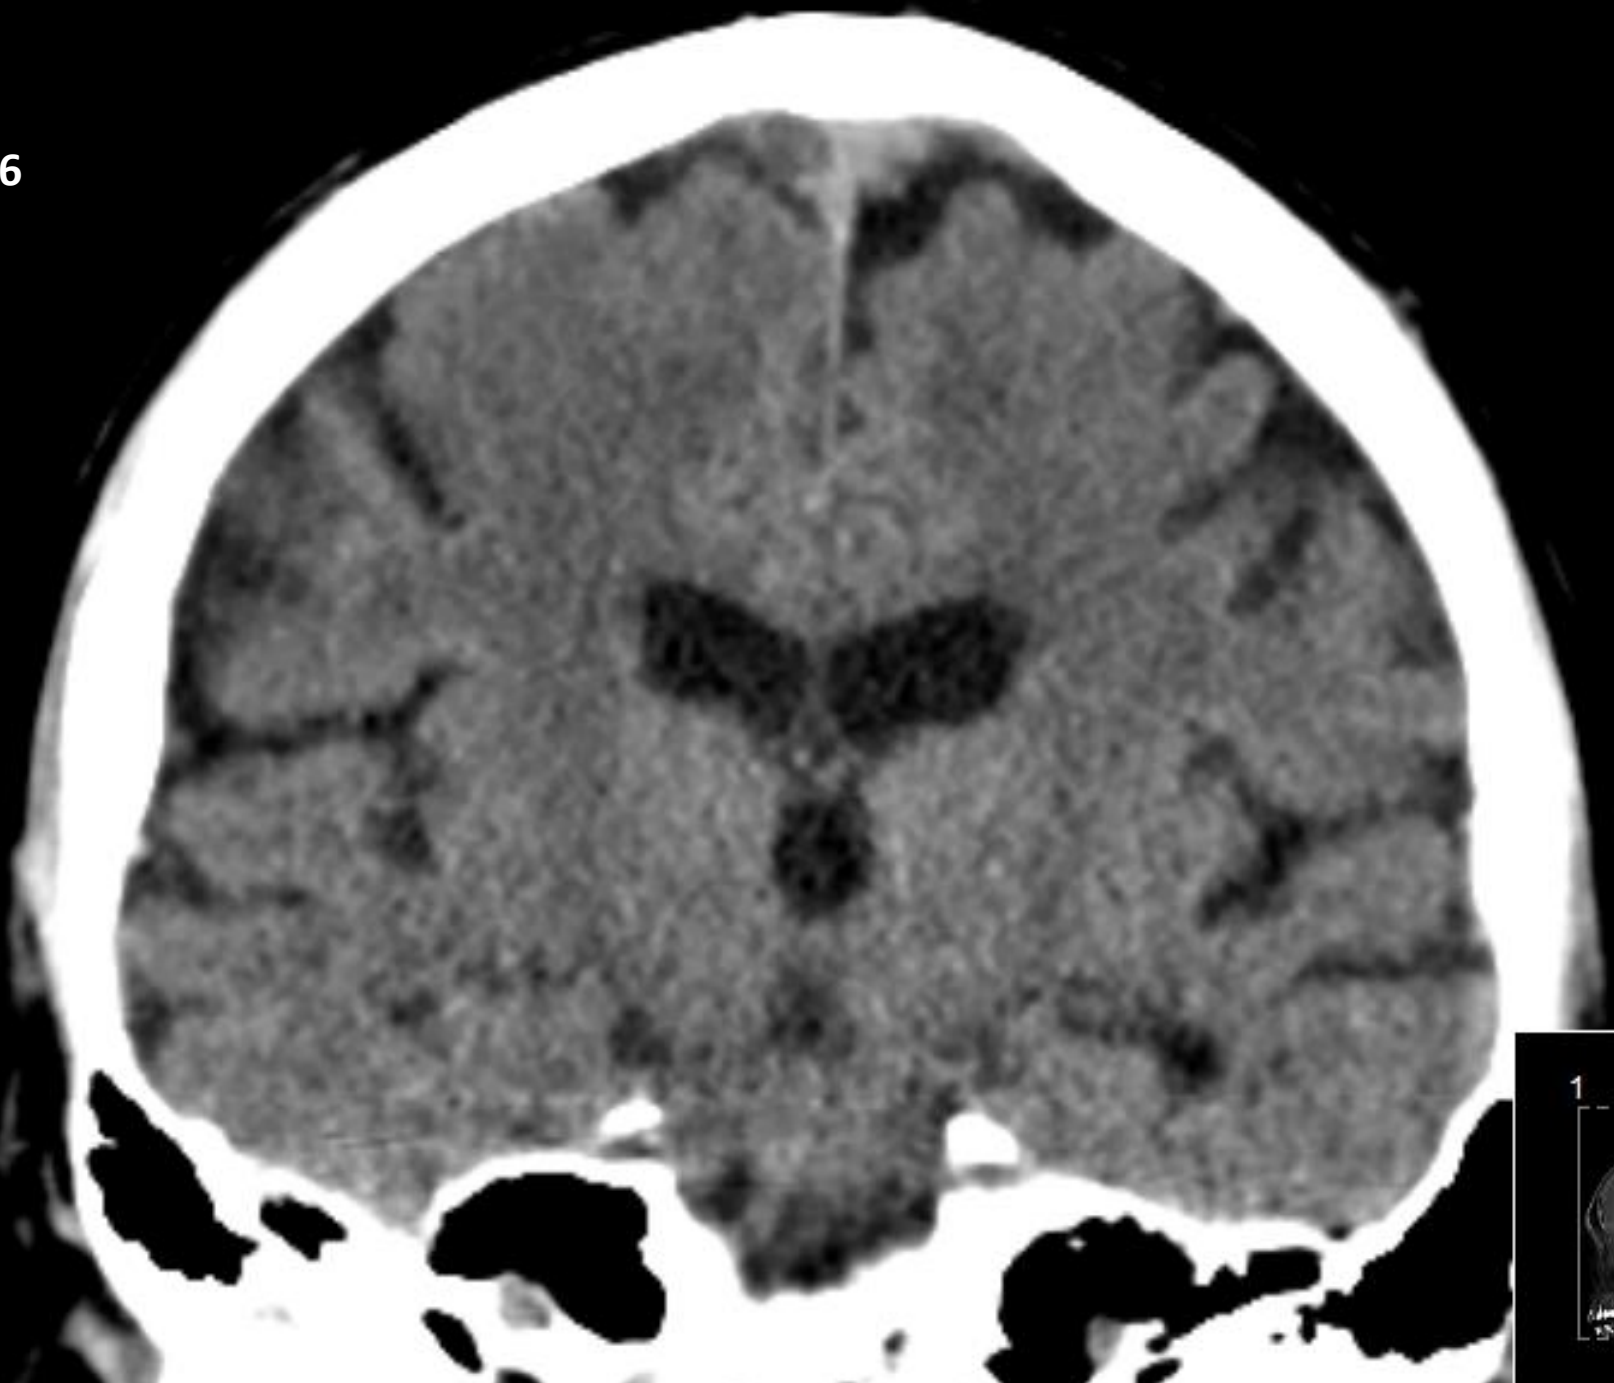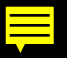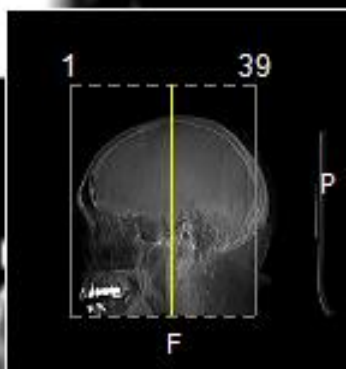

7

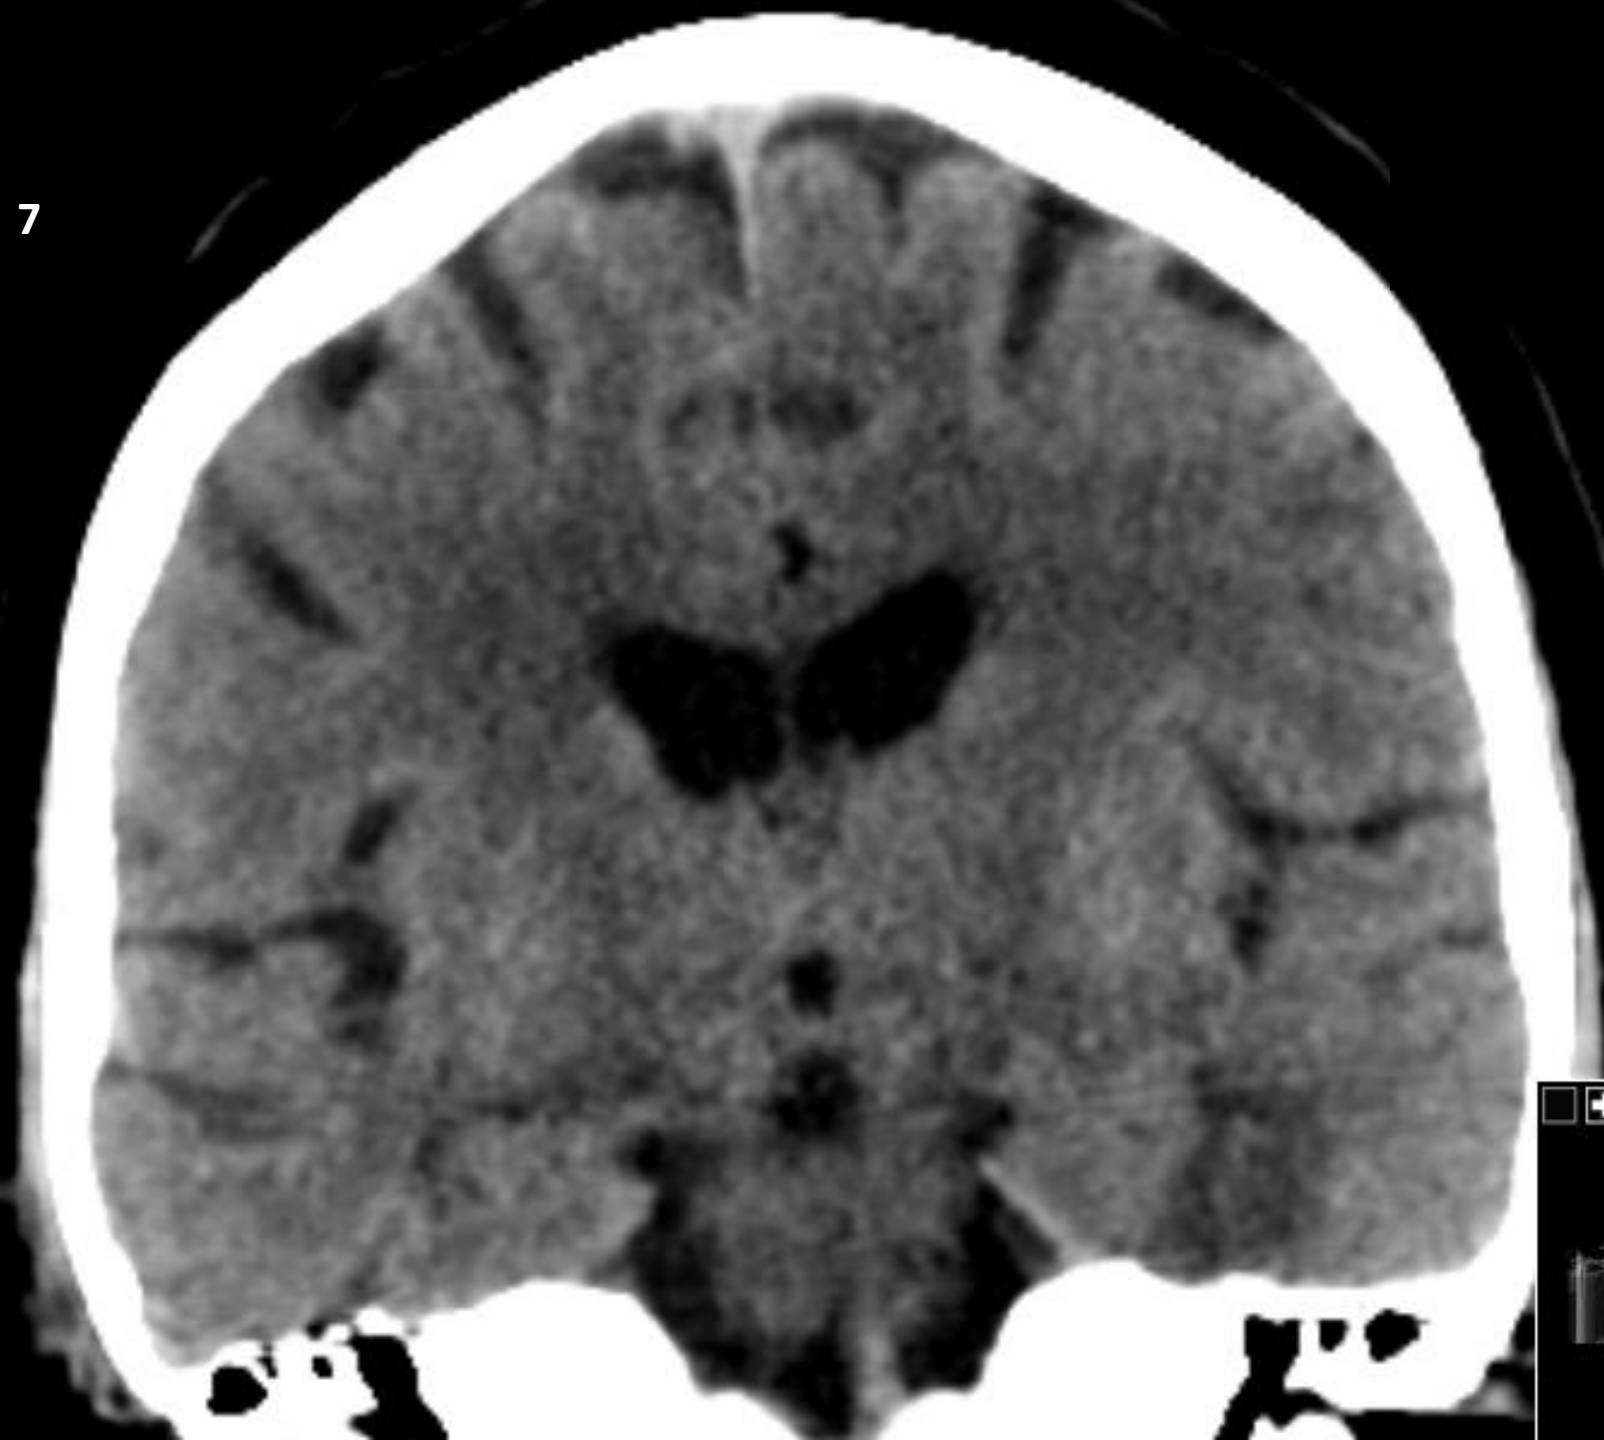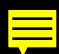

1/3

82 2

A

F

A small thumbnail image in the bottom right corner showing a cross-section of a brain. A yellow vertical line is drawn through the center, indicating a measurement or region of interest. The numbers 82 and 2 are visible near the line. The letters A and F are also present.

8

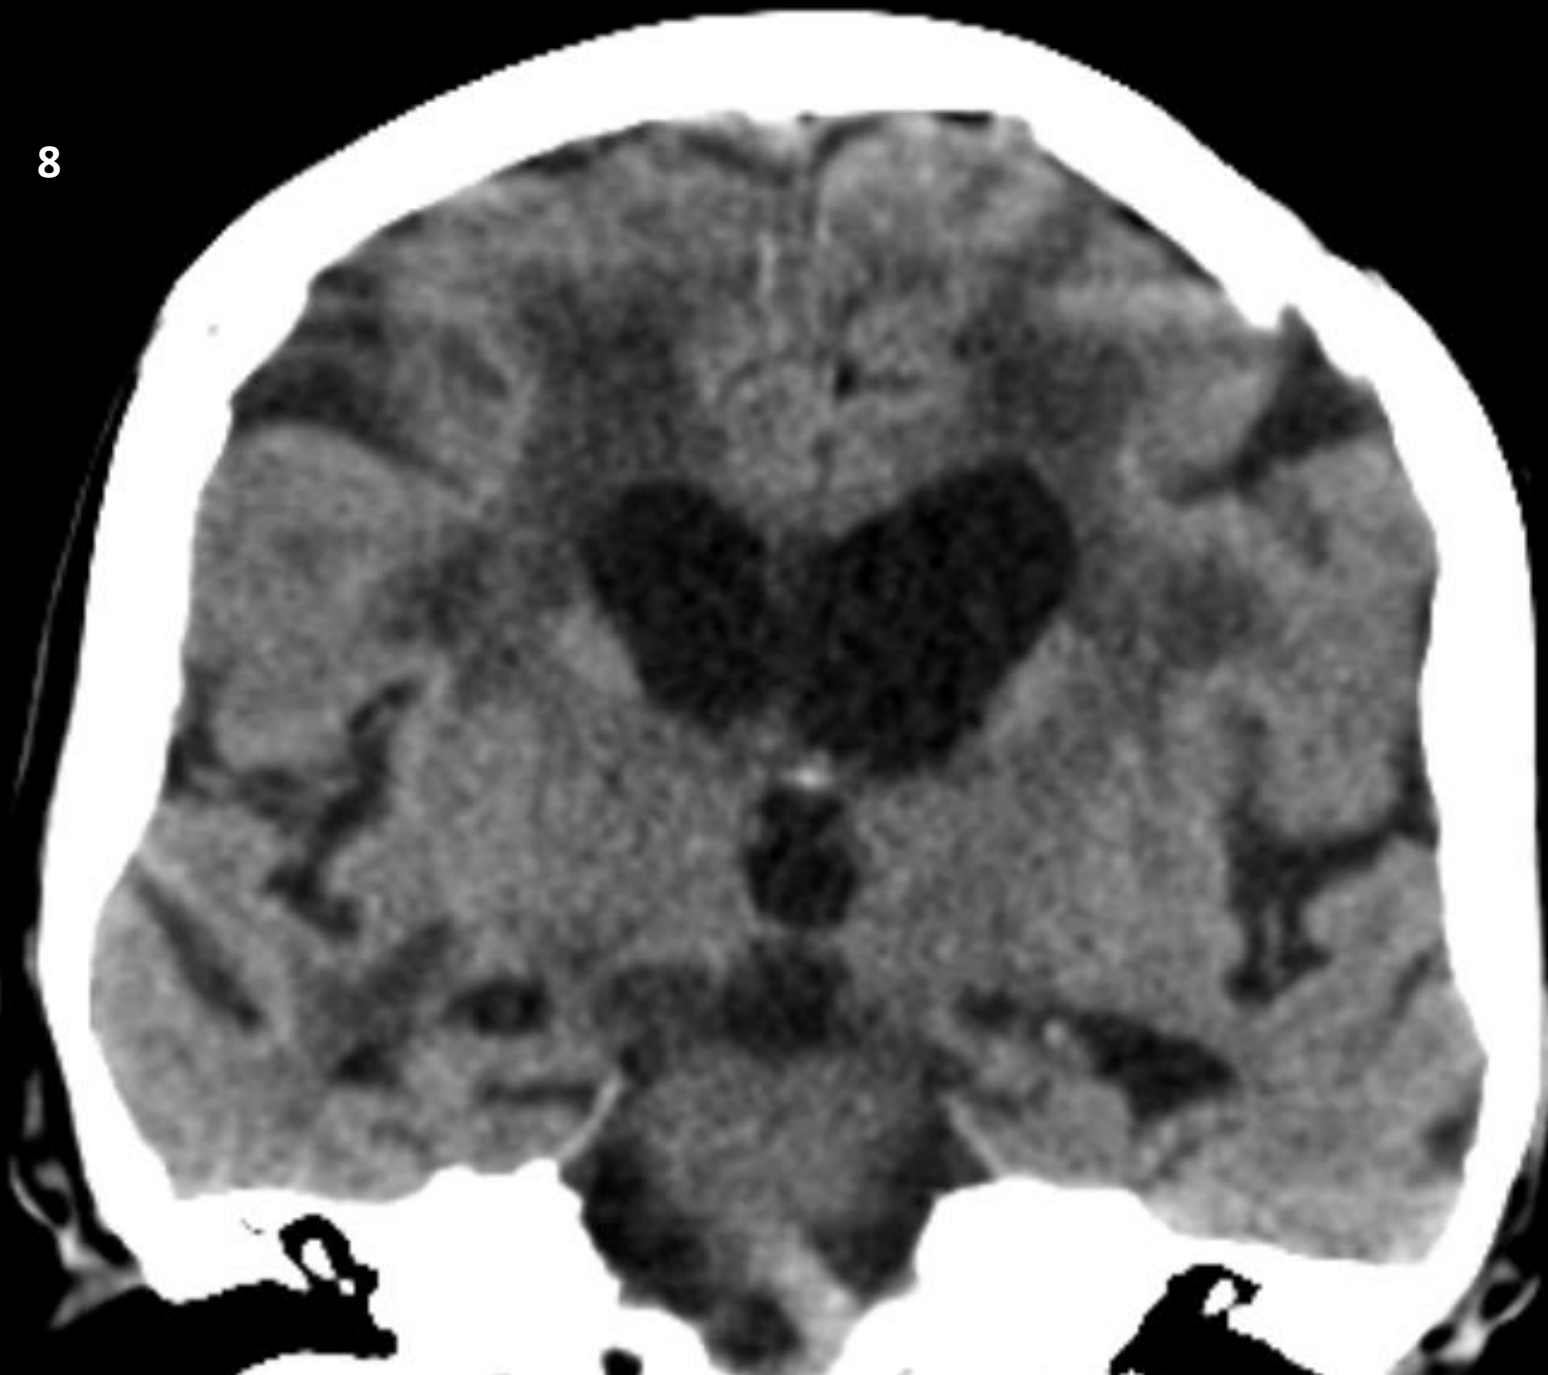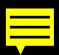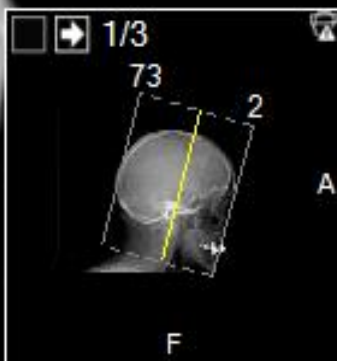



9

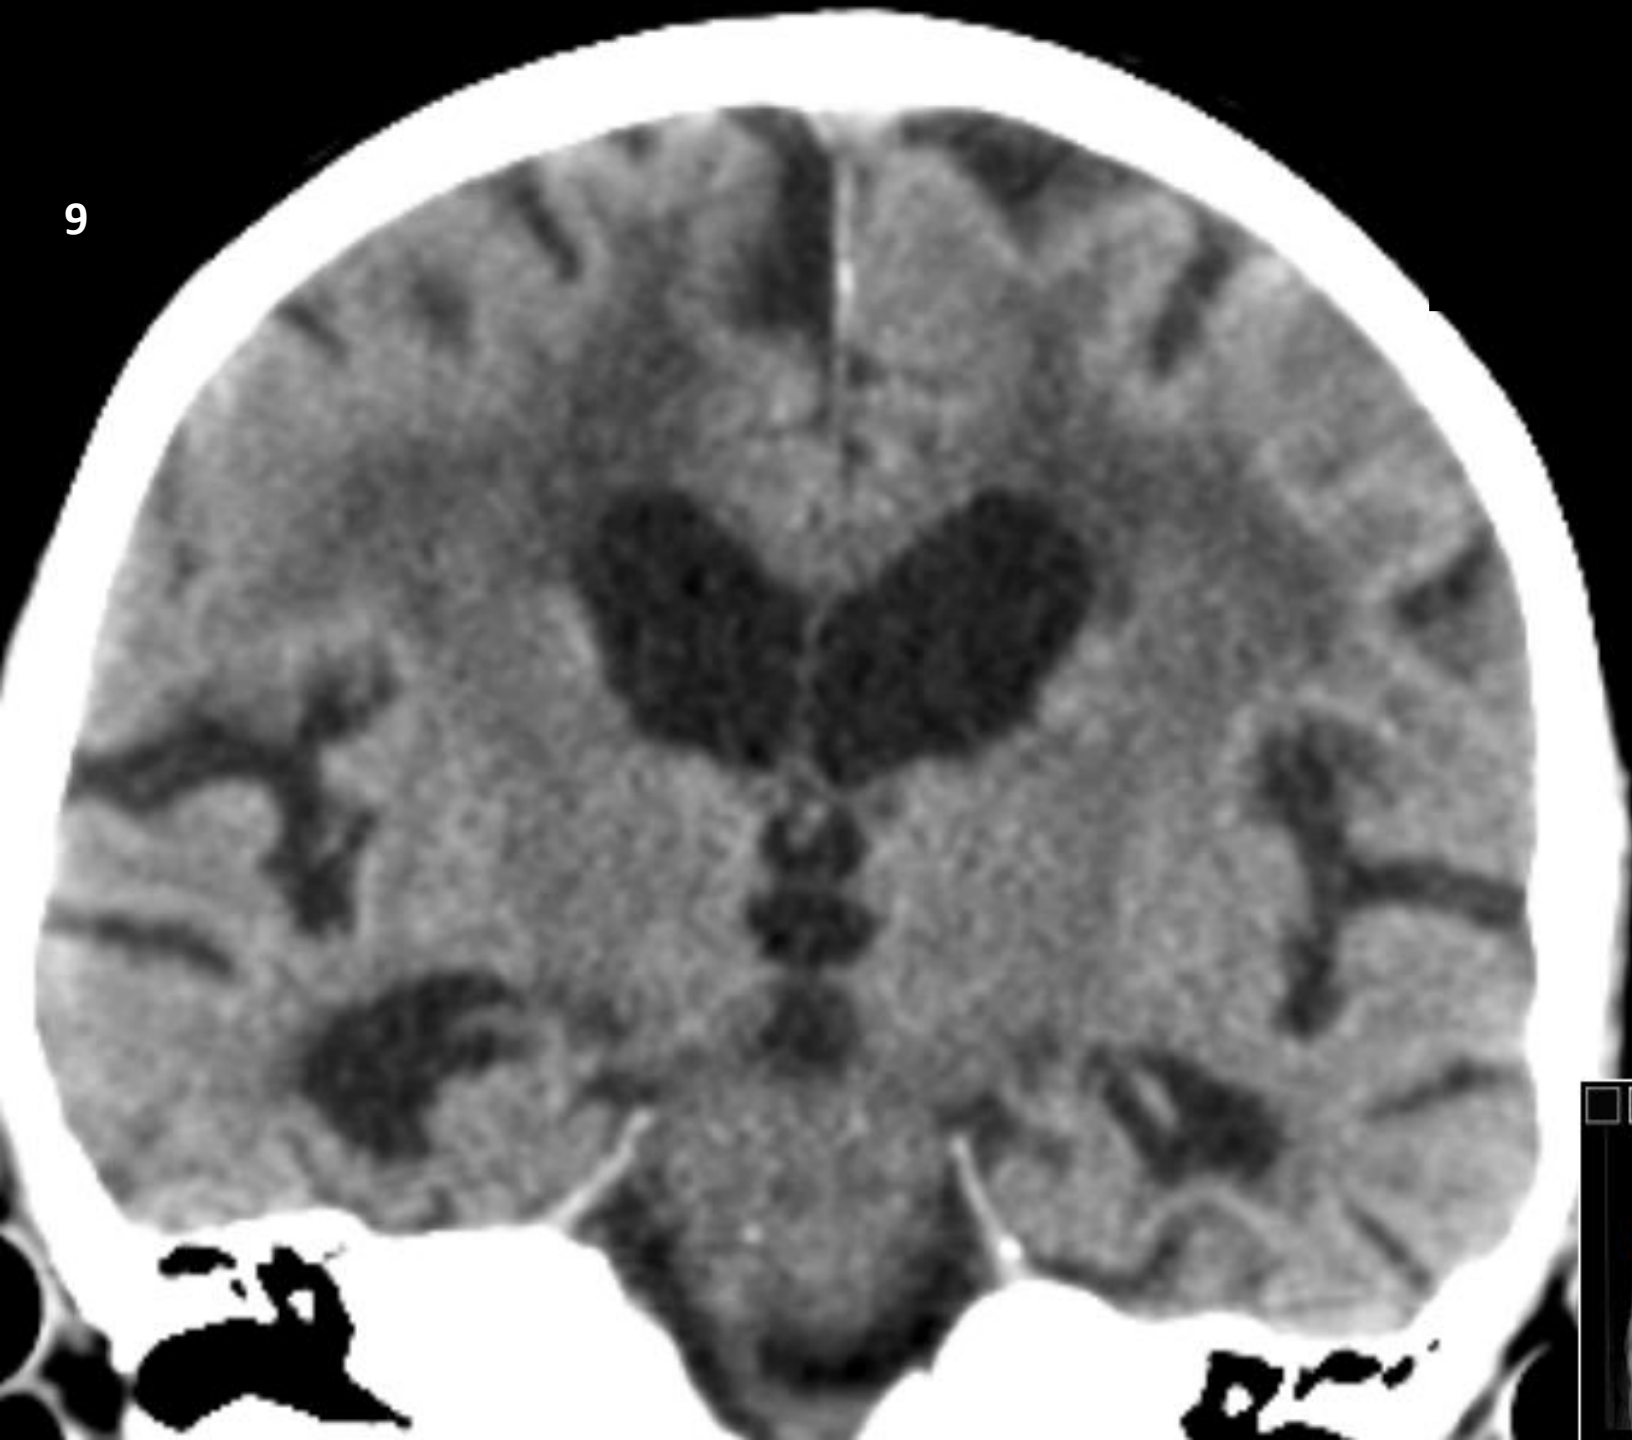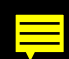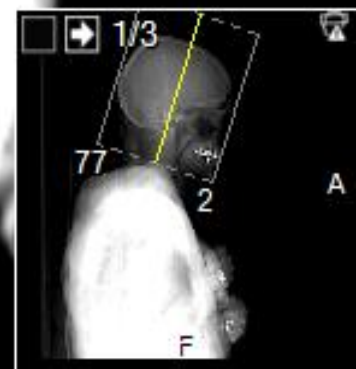

10

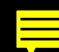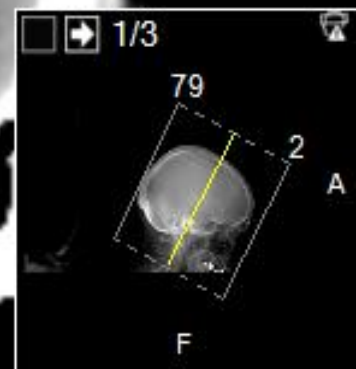

11

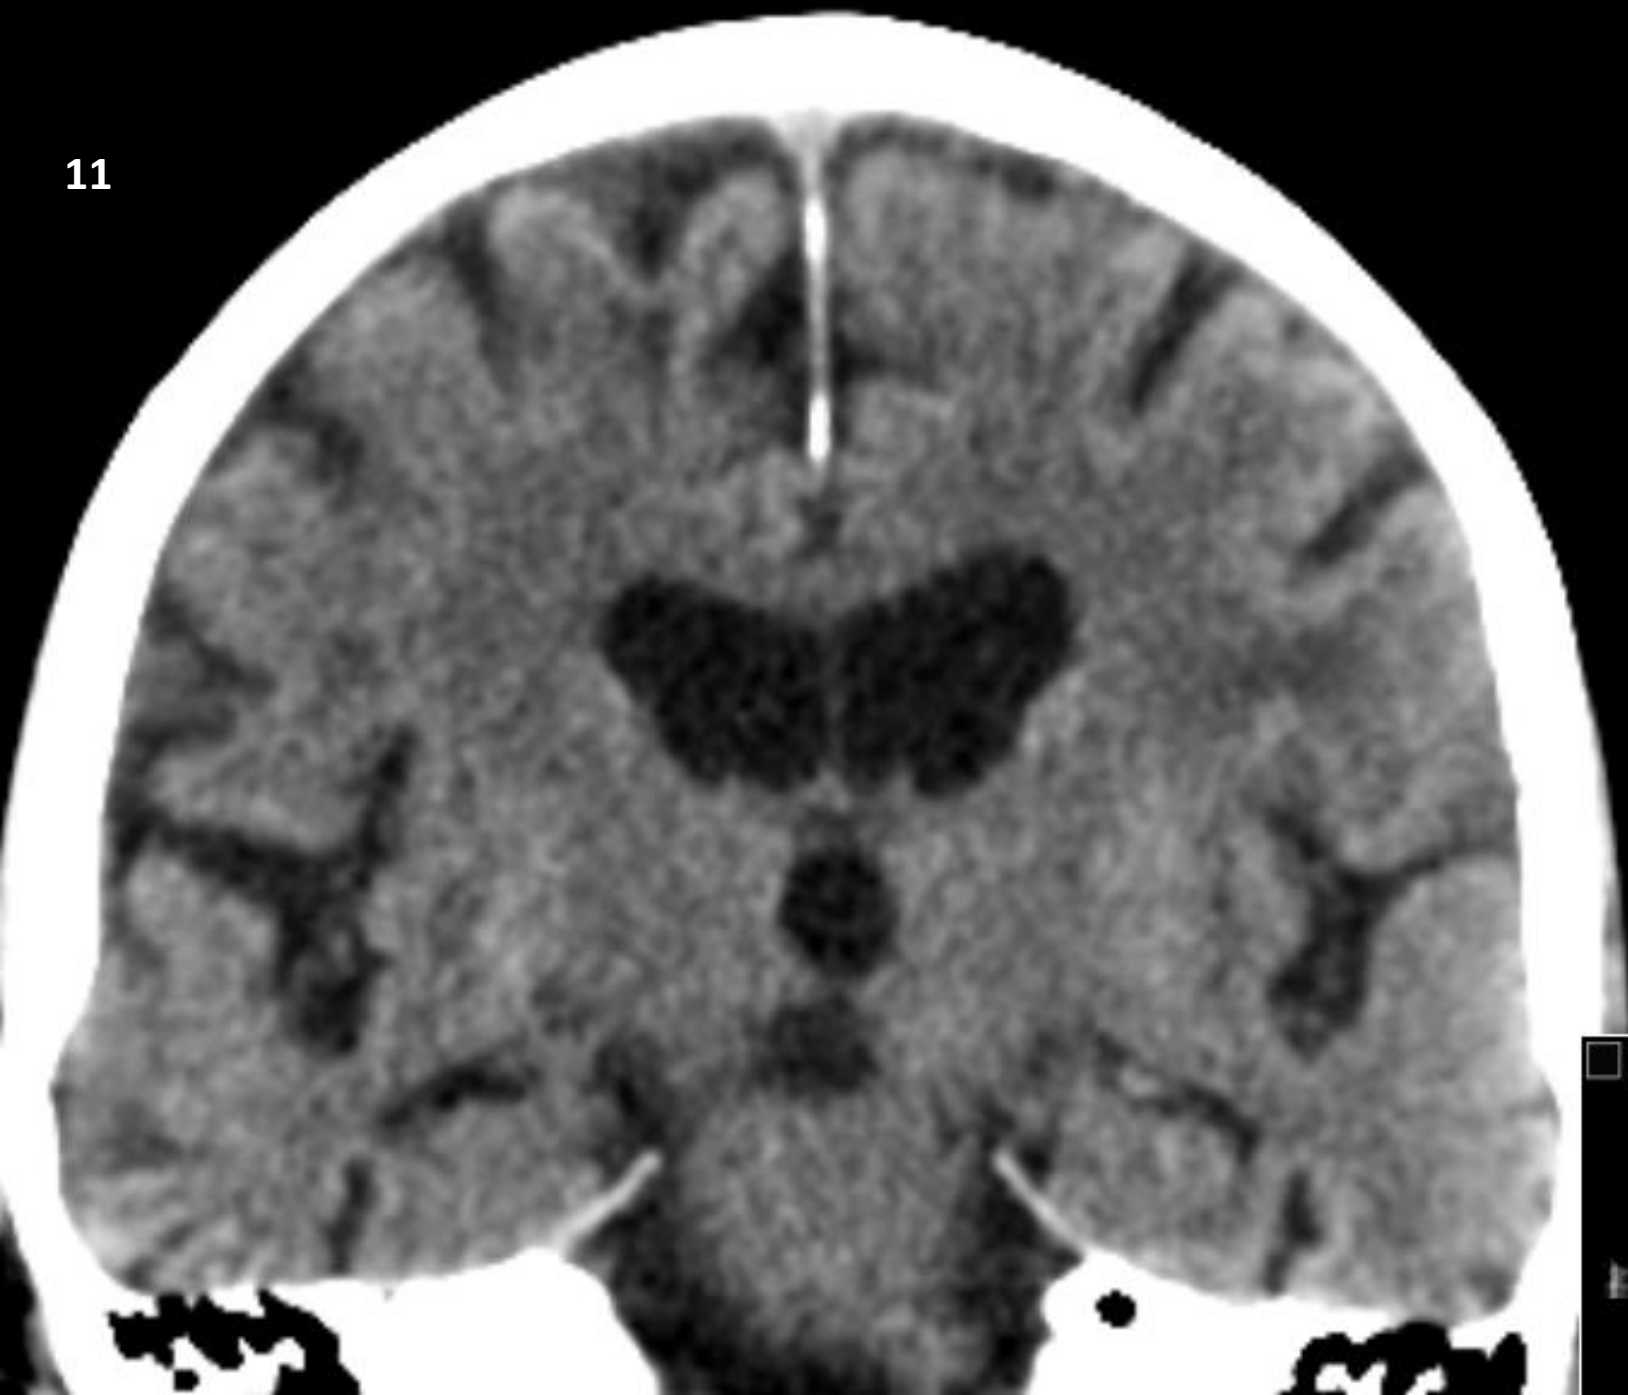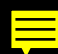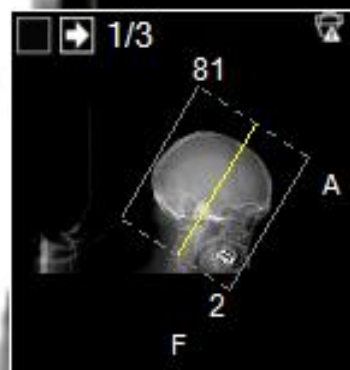

12

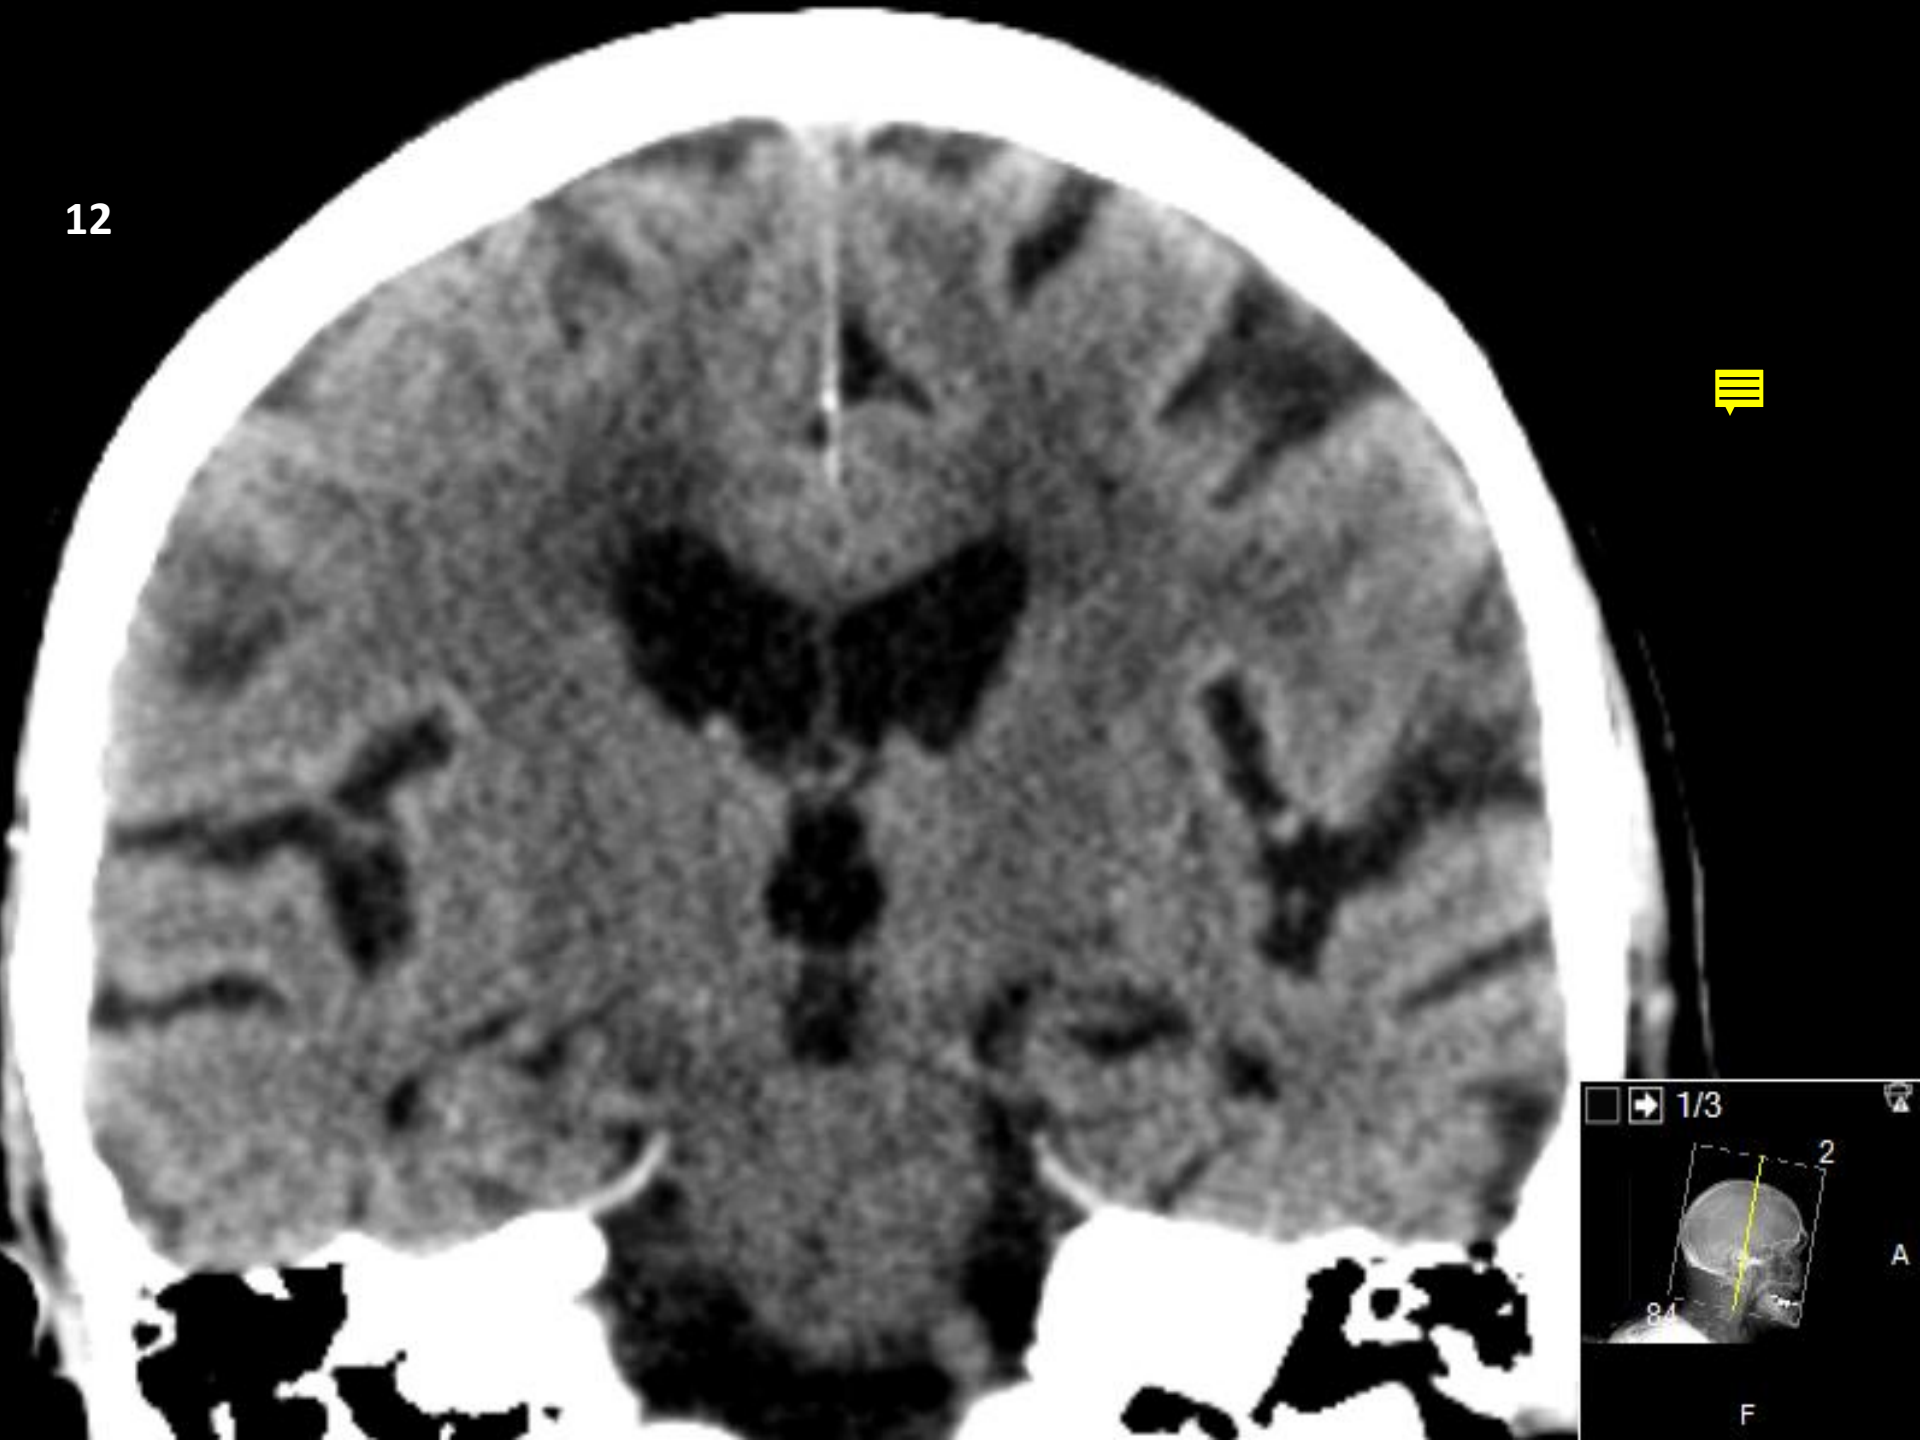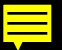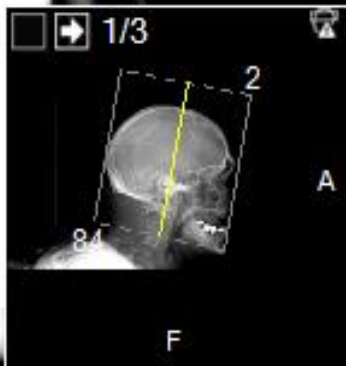

13

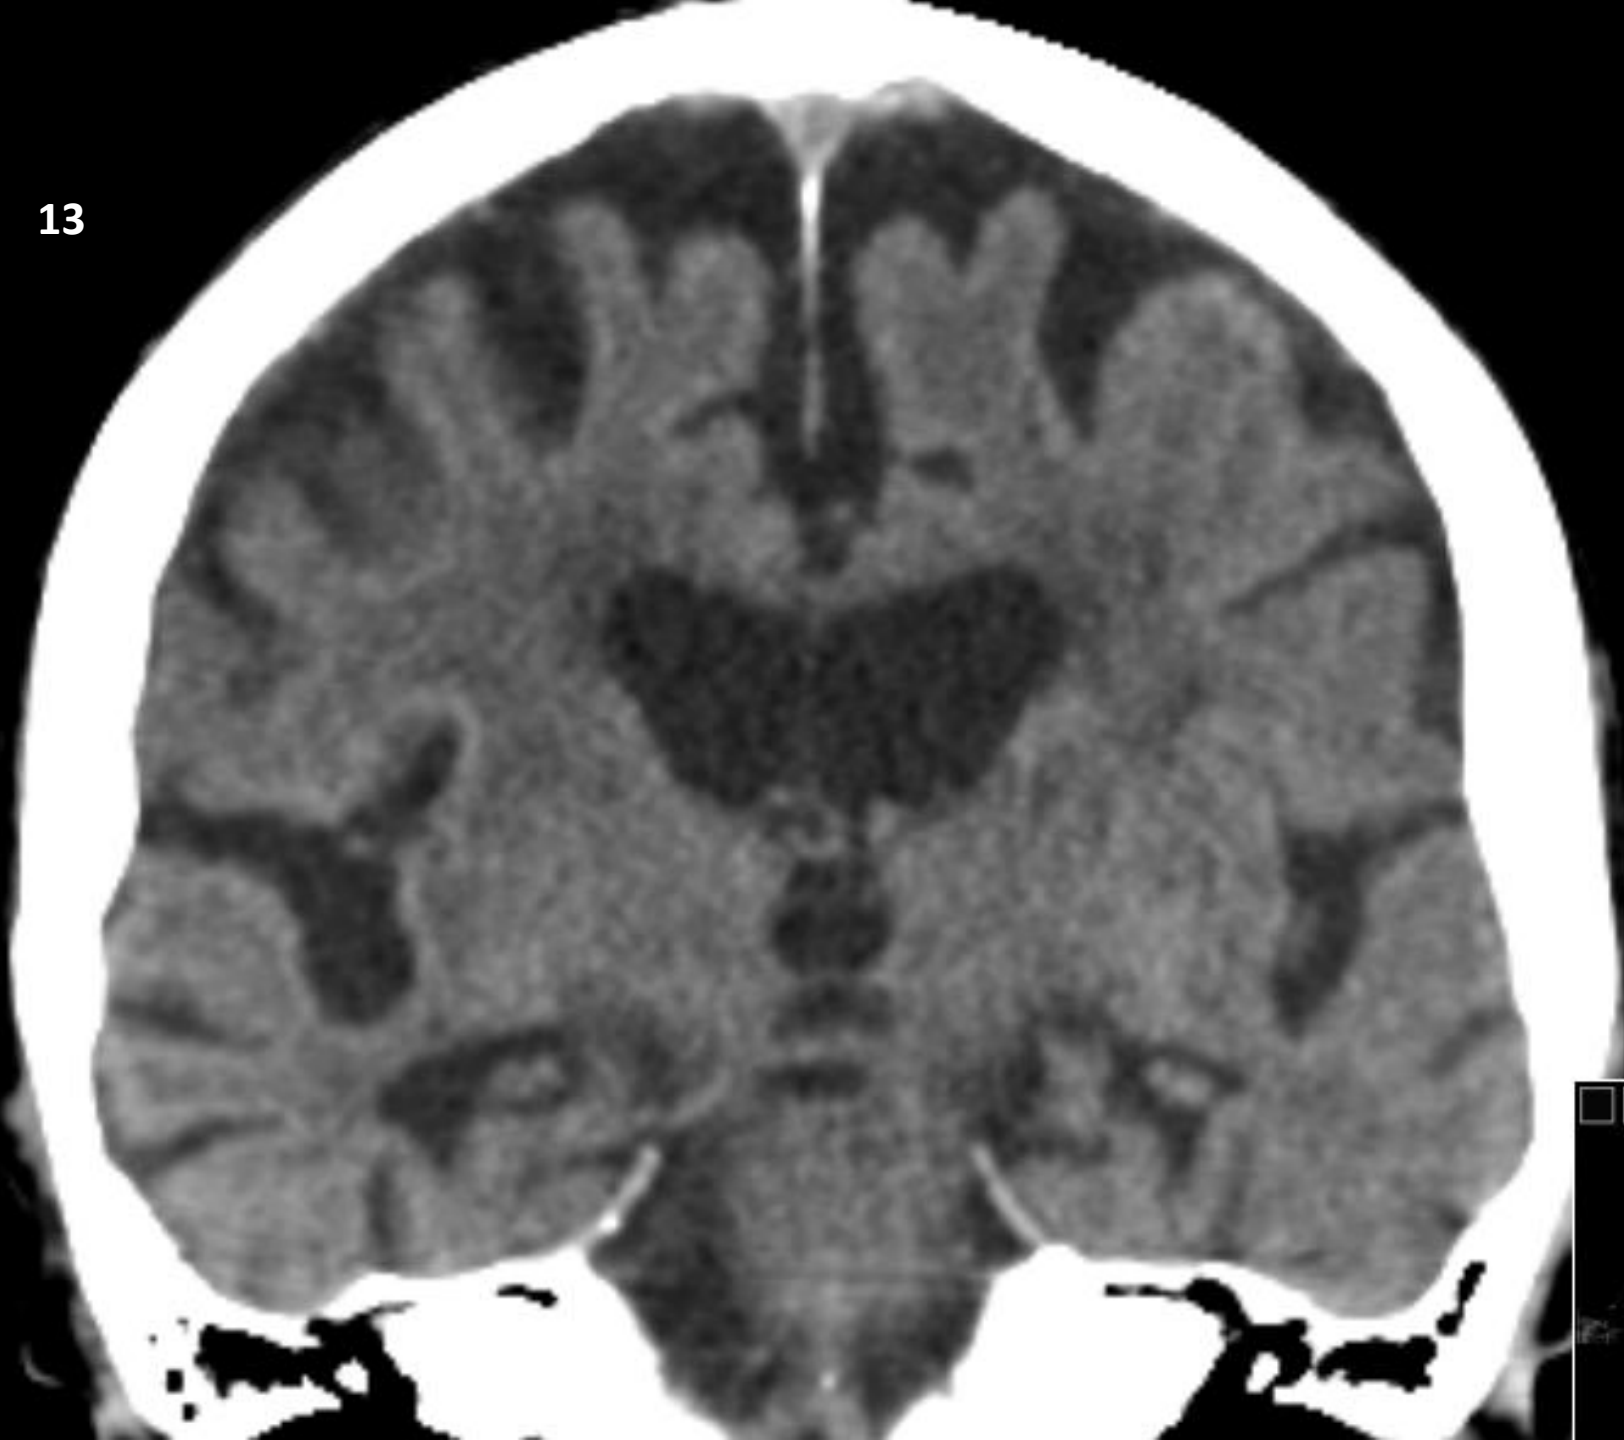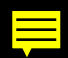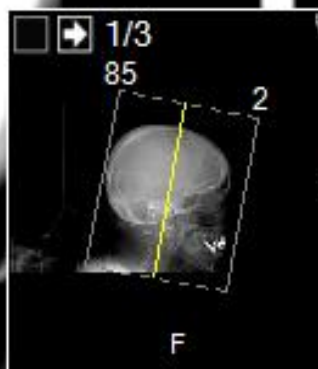

14

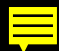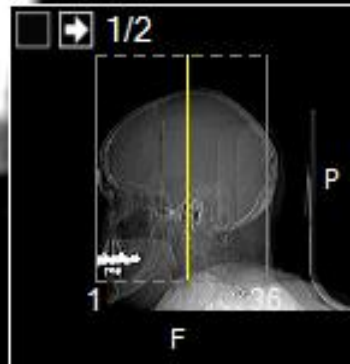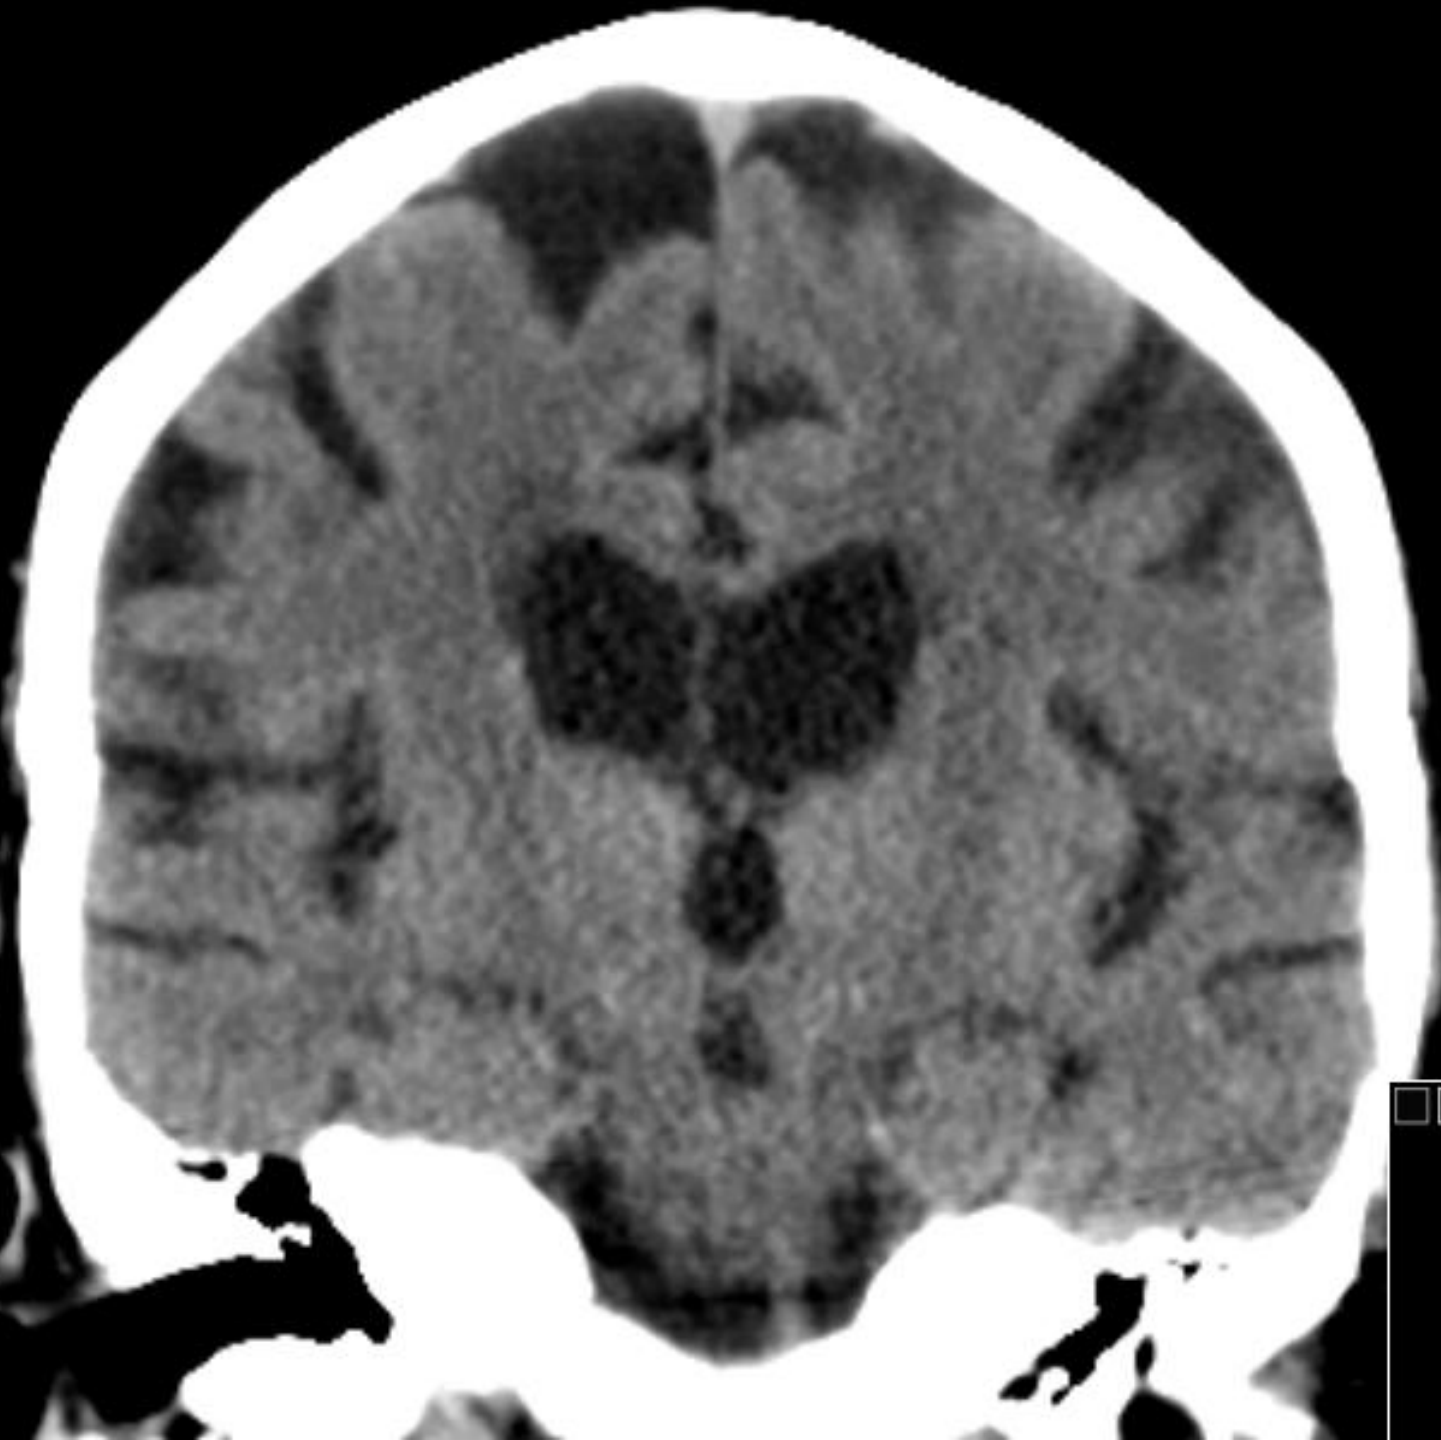

15

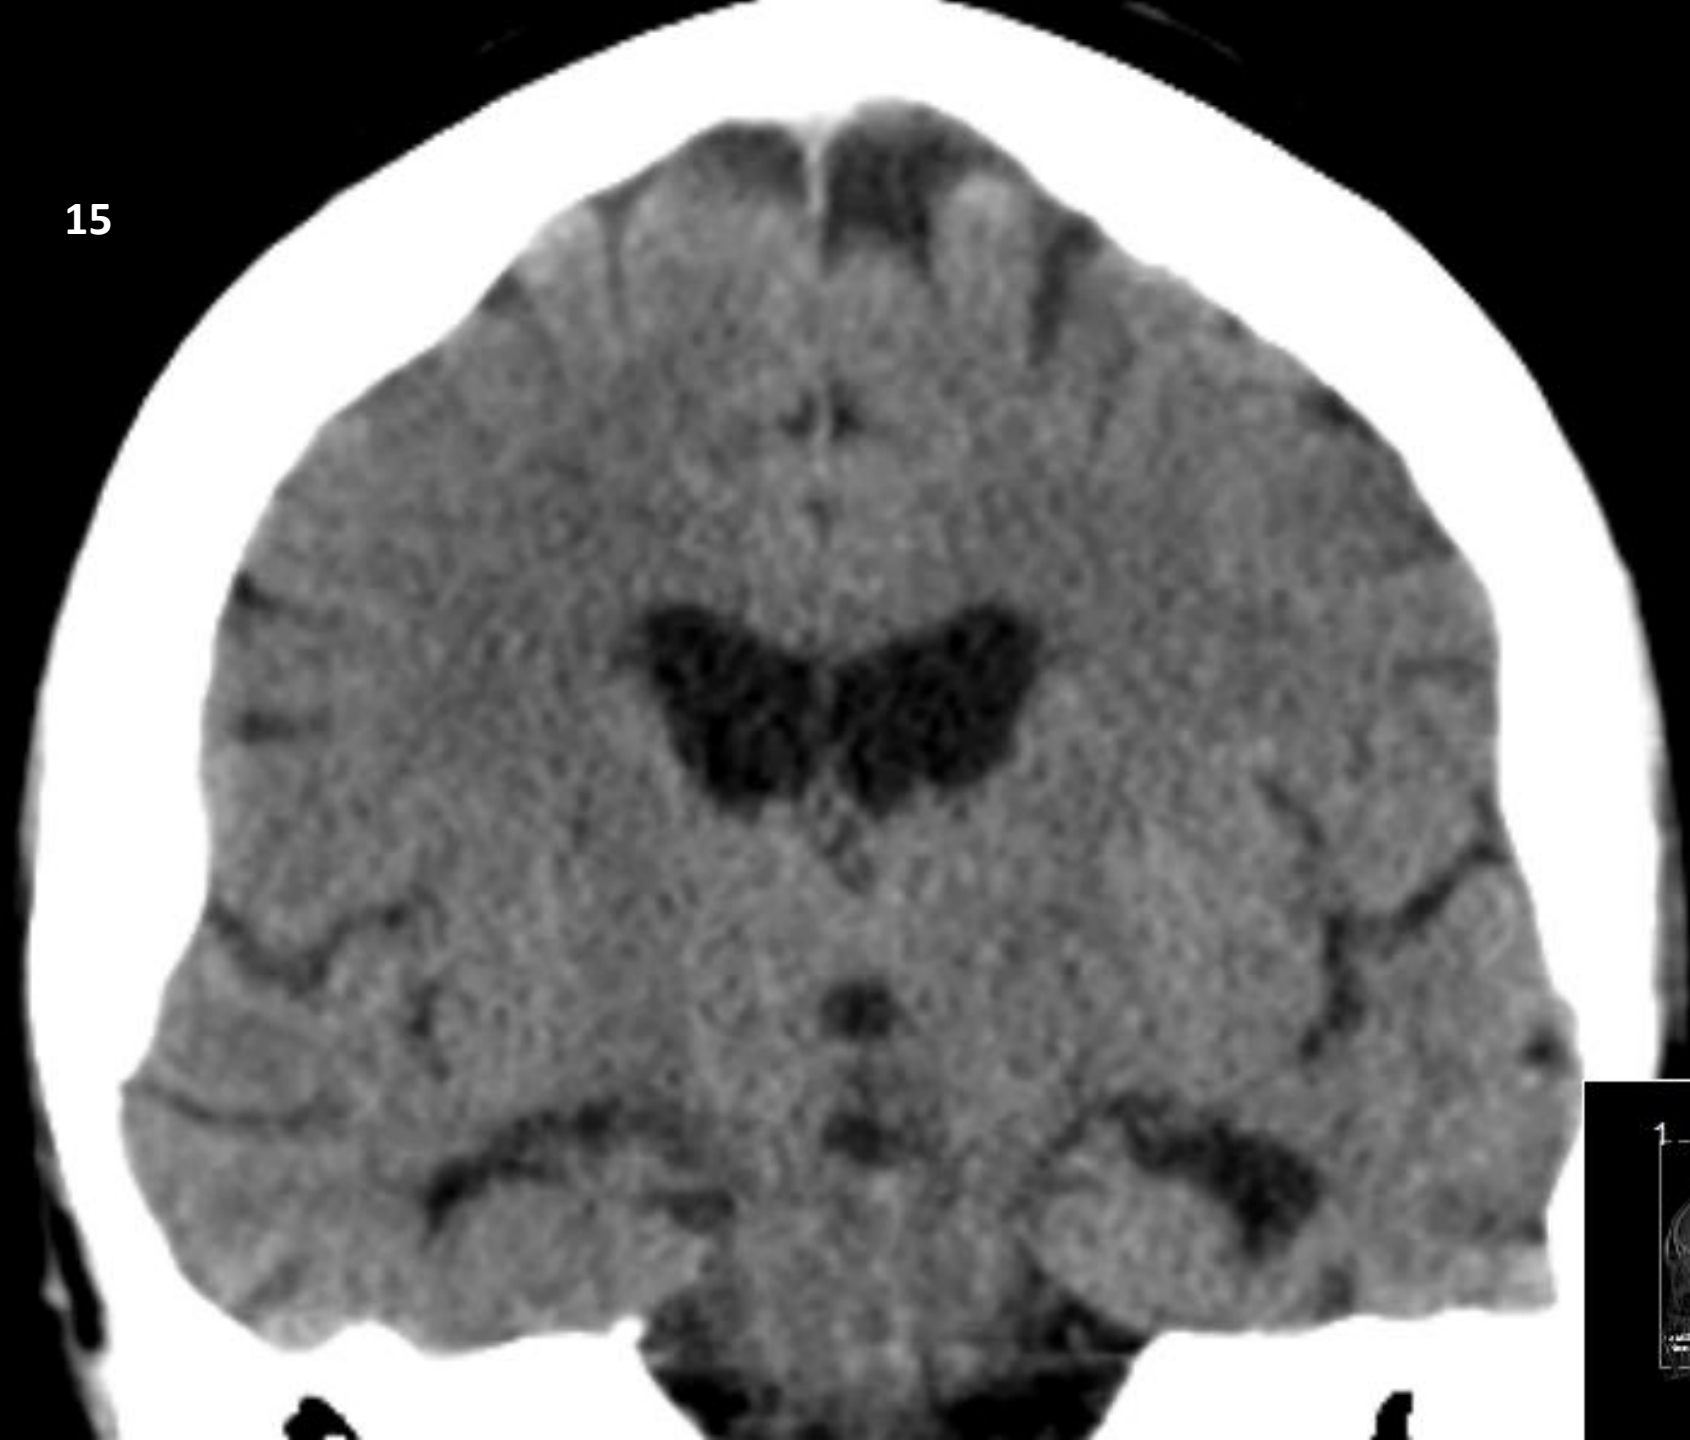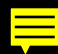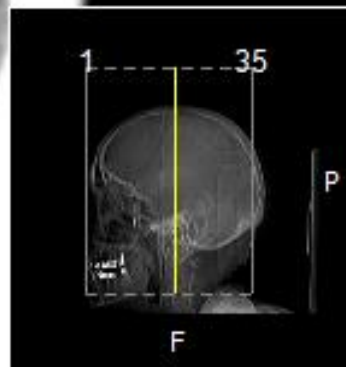

16

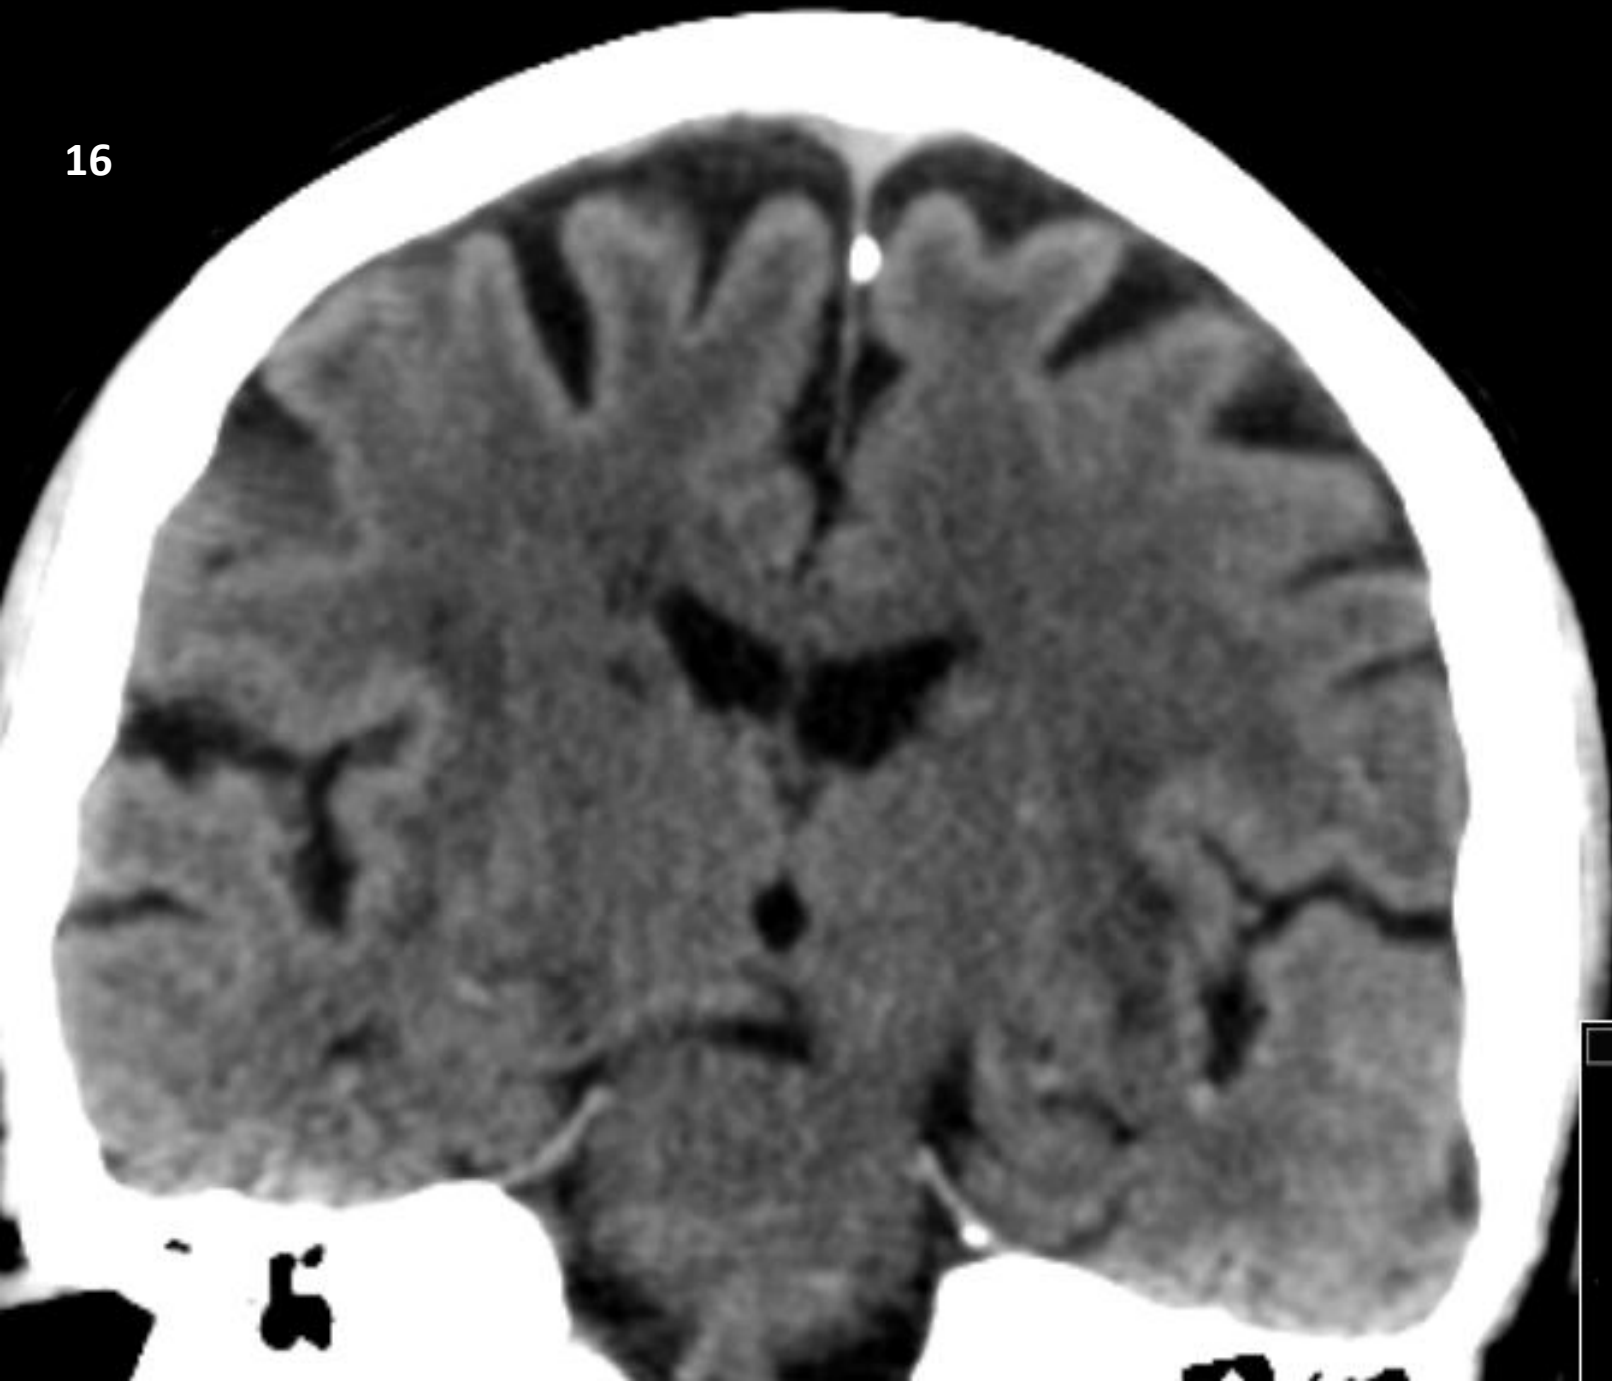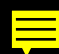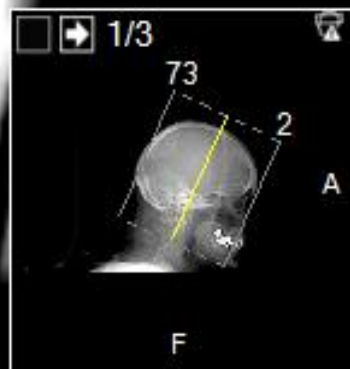



17

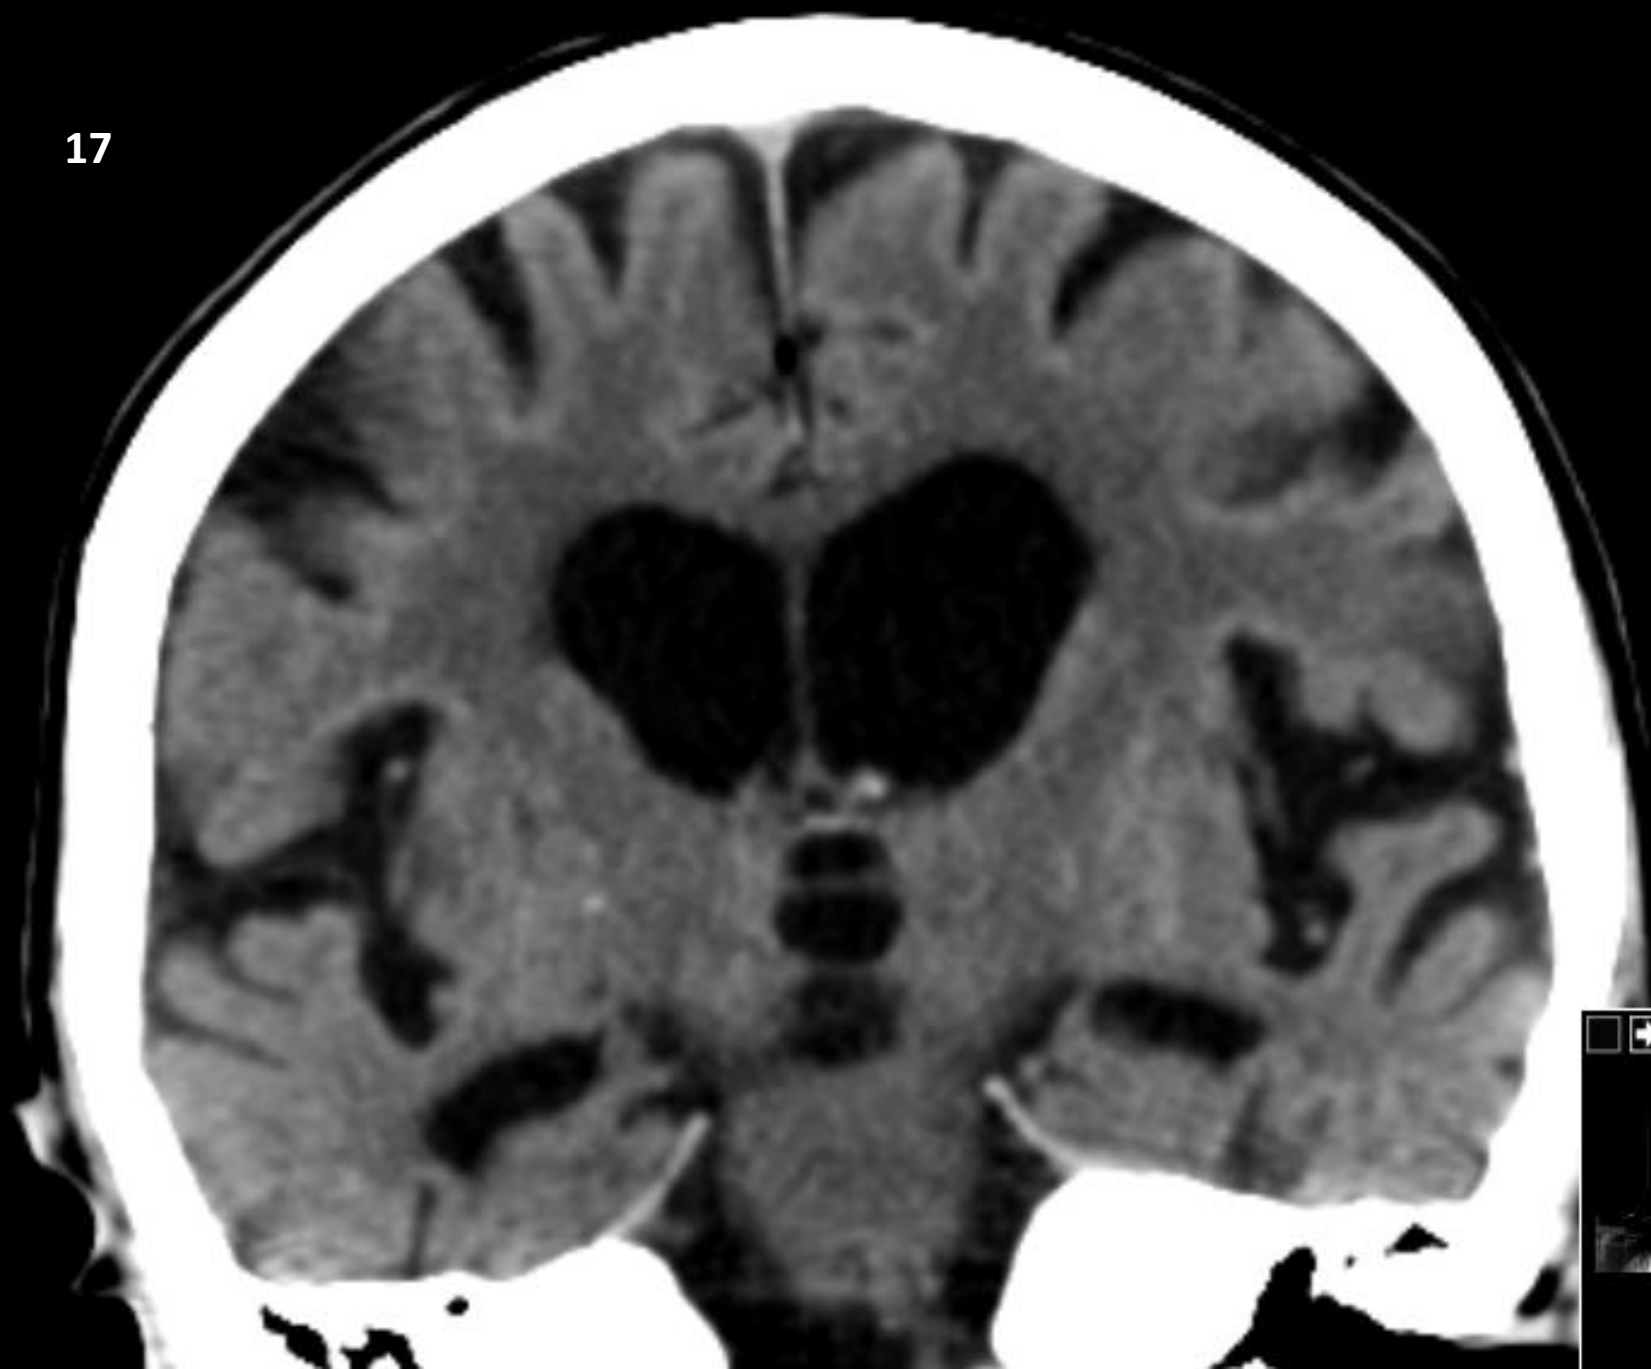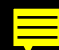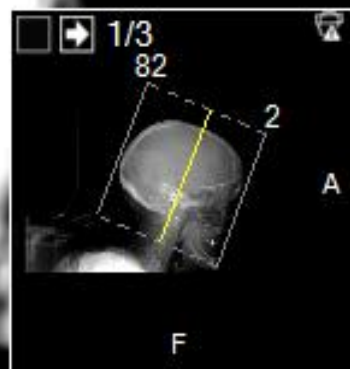

18

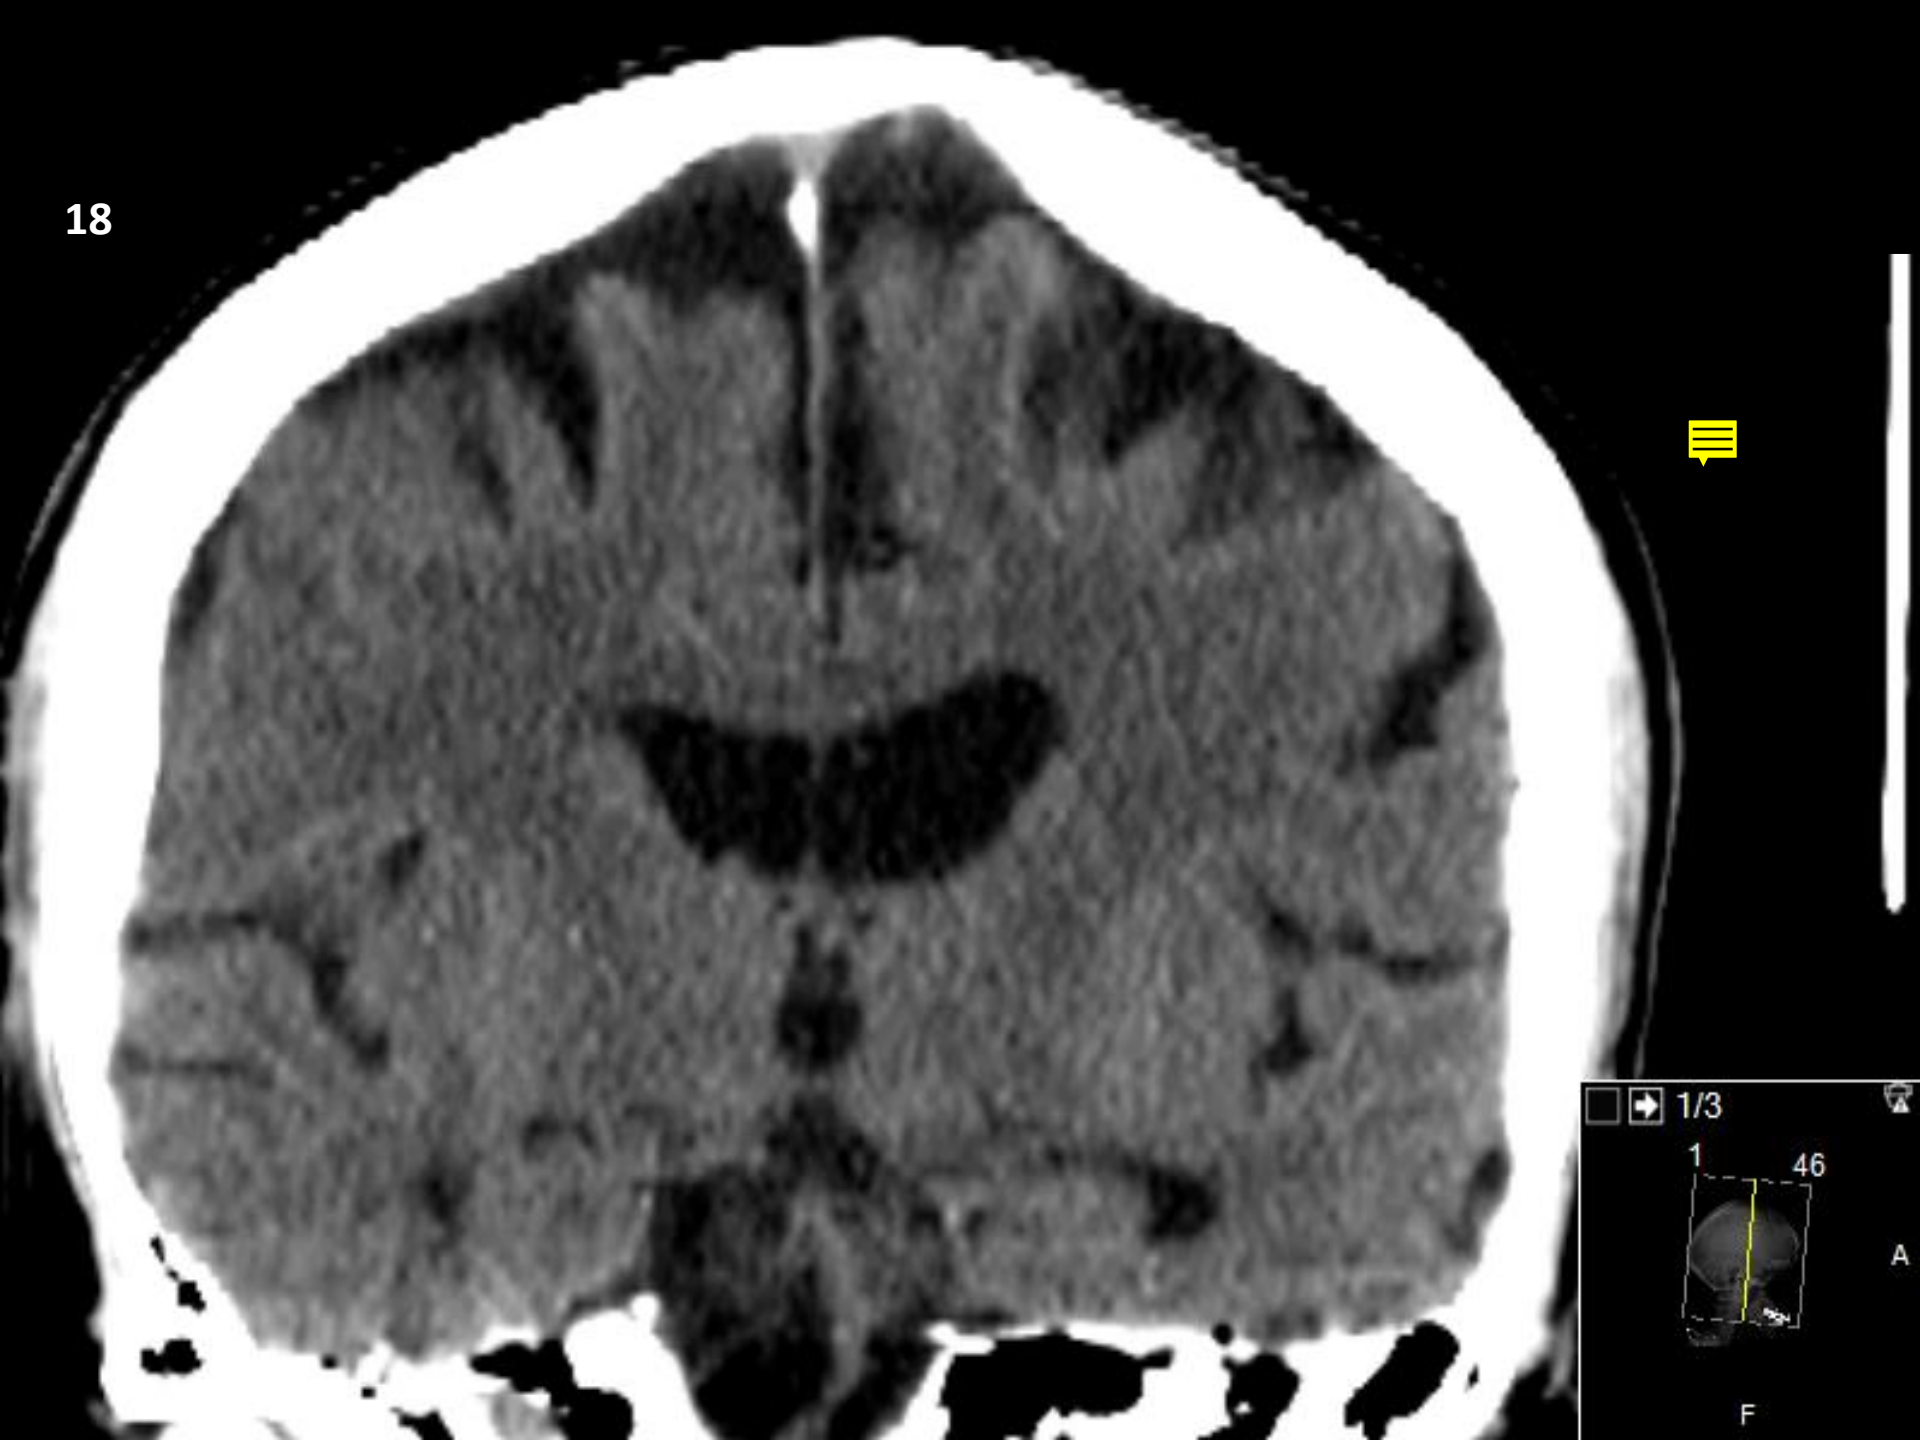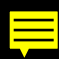

1/3

1 46

A

F

A small thumbnail image in the bottom right corner shows a cross-section of a brain with a yellow line indicating the slice location. The numbers 1 and 46 are visible, likely representing slice numbers. The letters A and F are also present, possibly indicating anatomical planes or directions.

19

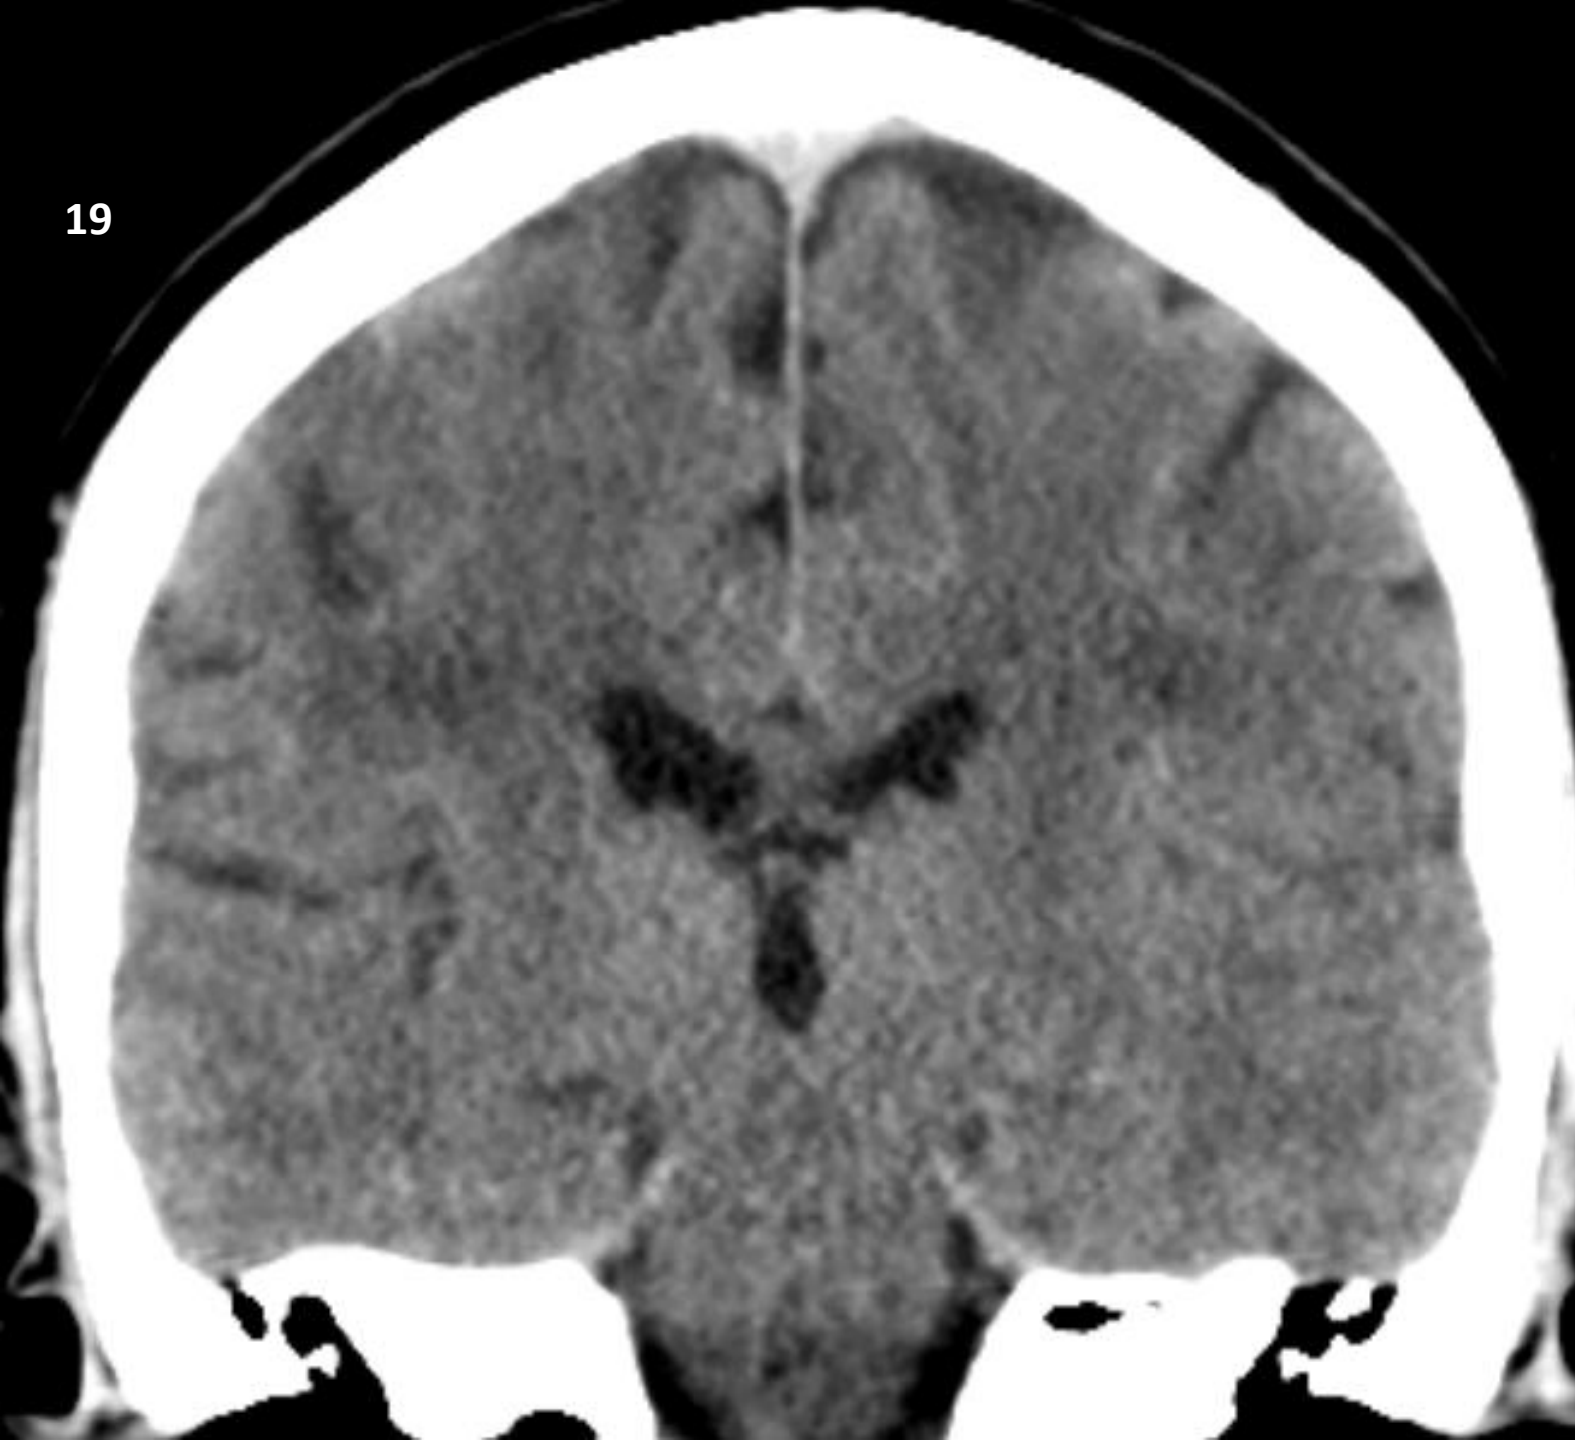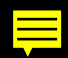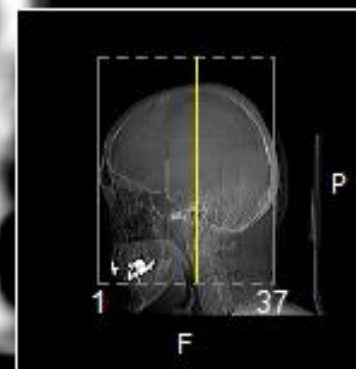

20

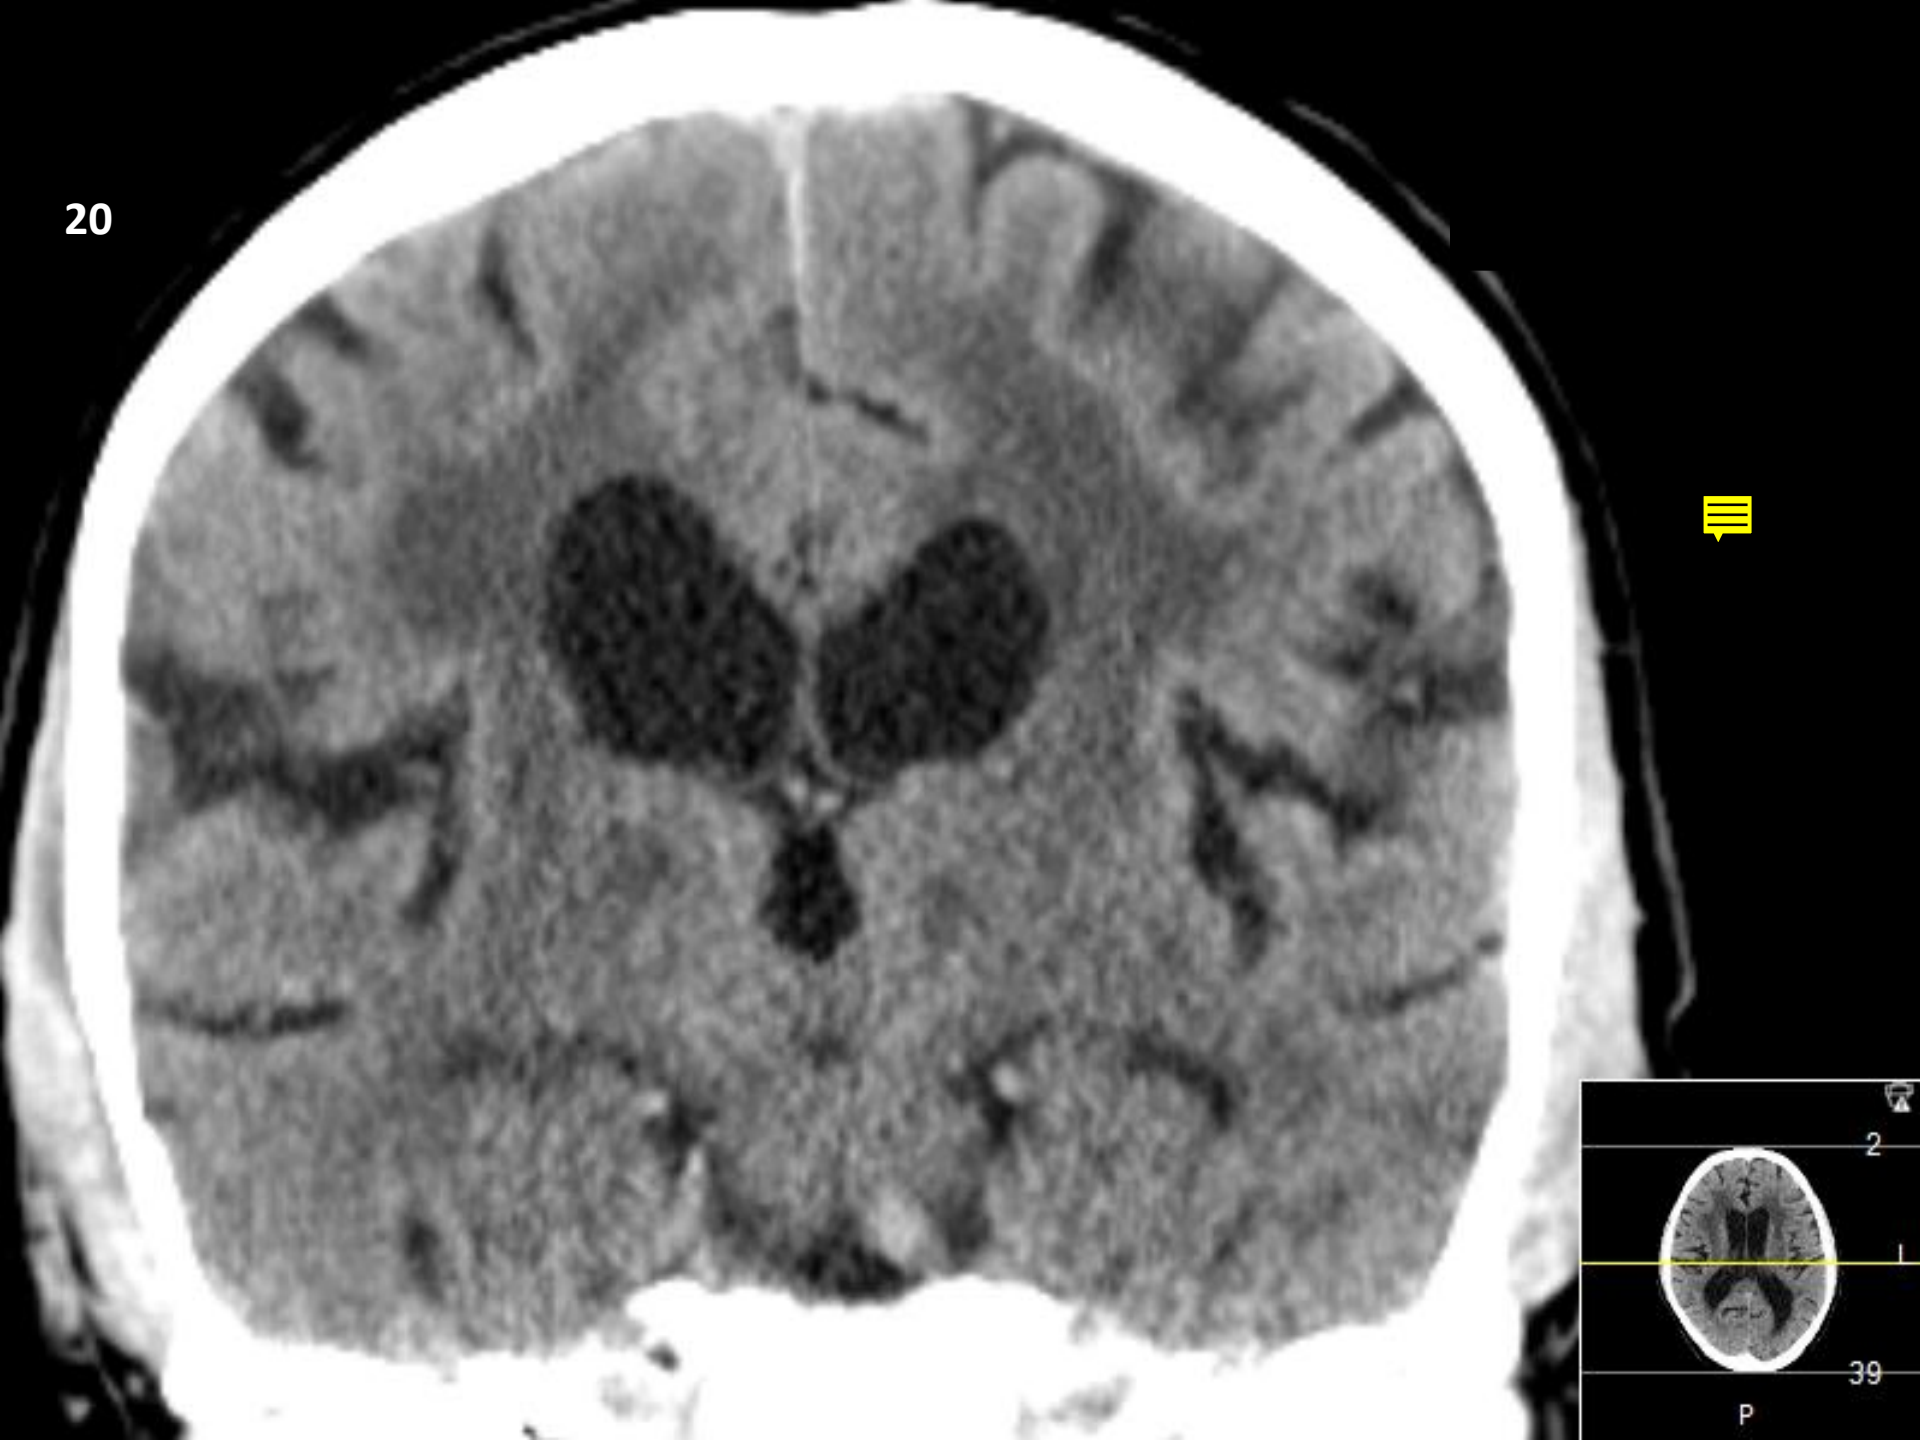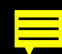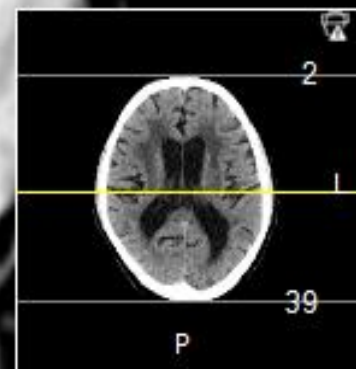

Supplement: 13244_2016_521_MOESM4_ESM.pdf [file 13244_2016_521_MOESM4_ESM.pdf]
