# Supplementary material for: Imaging biomarkers of dementia: recommended visual rating scales with teaching cases
Source: PubMed Central journal article supplement (PMC5265189; doi:10.1007/s13244-016-0521-6), 2016-12-21

1

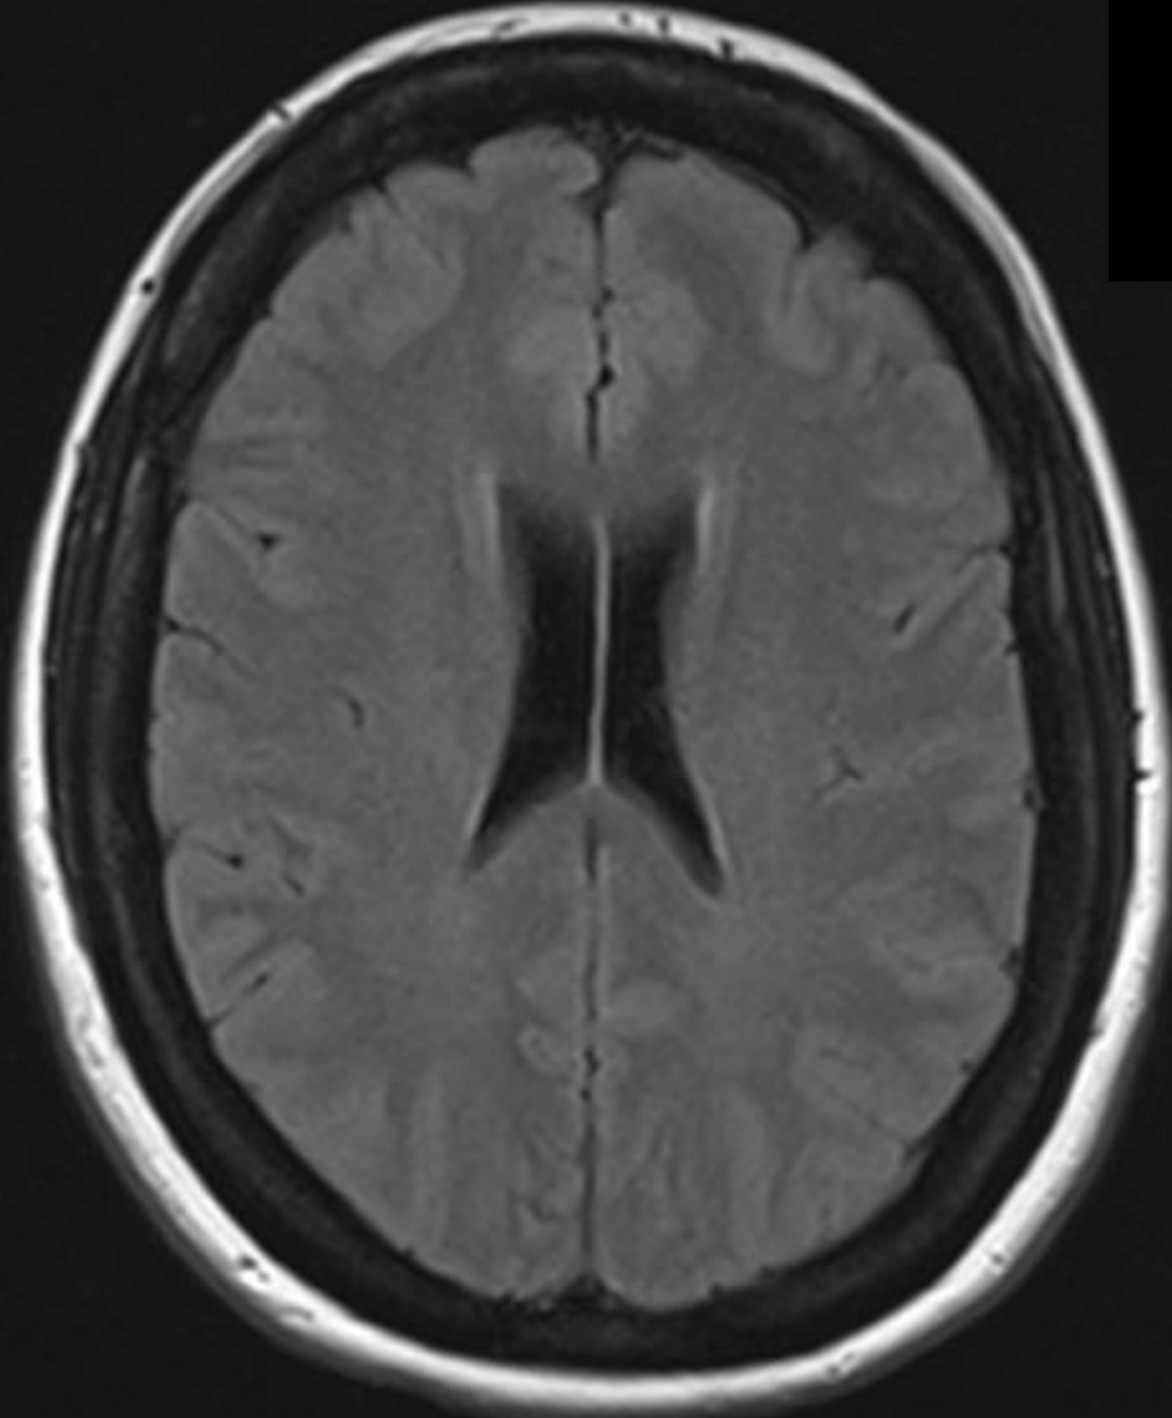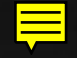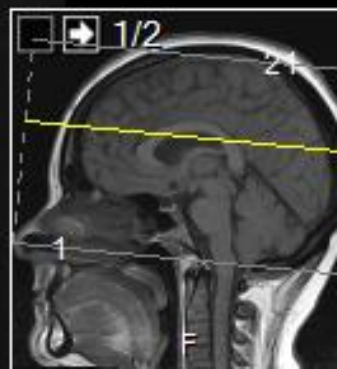

2

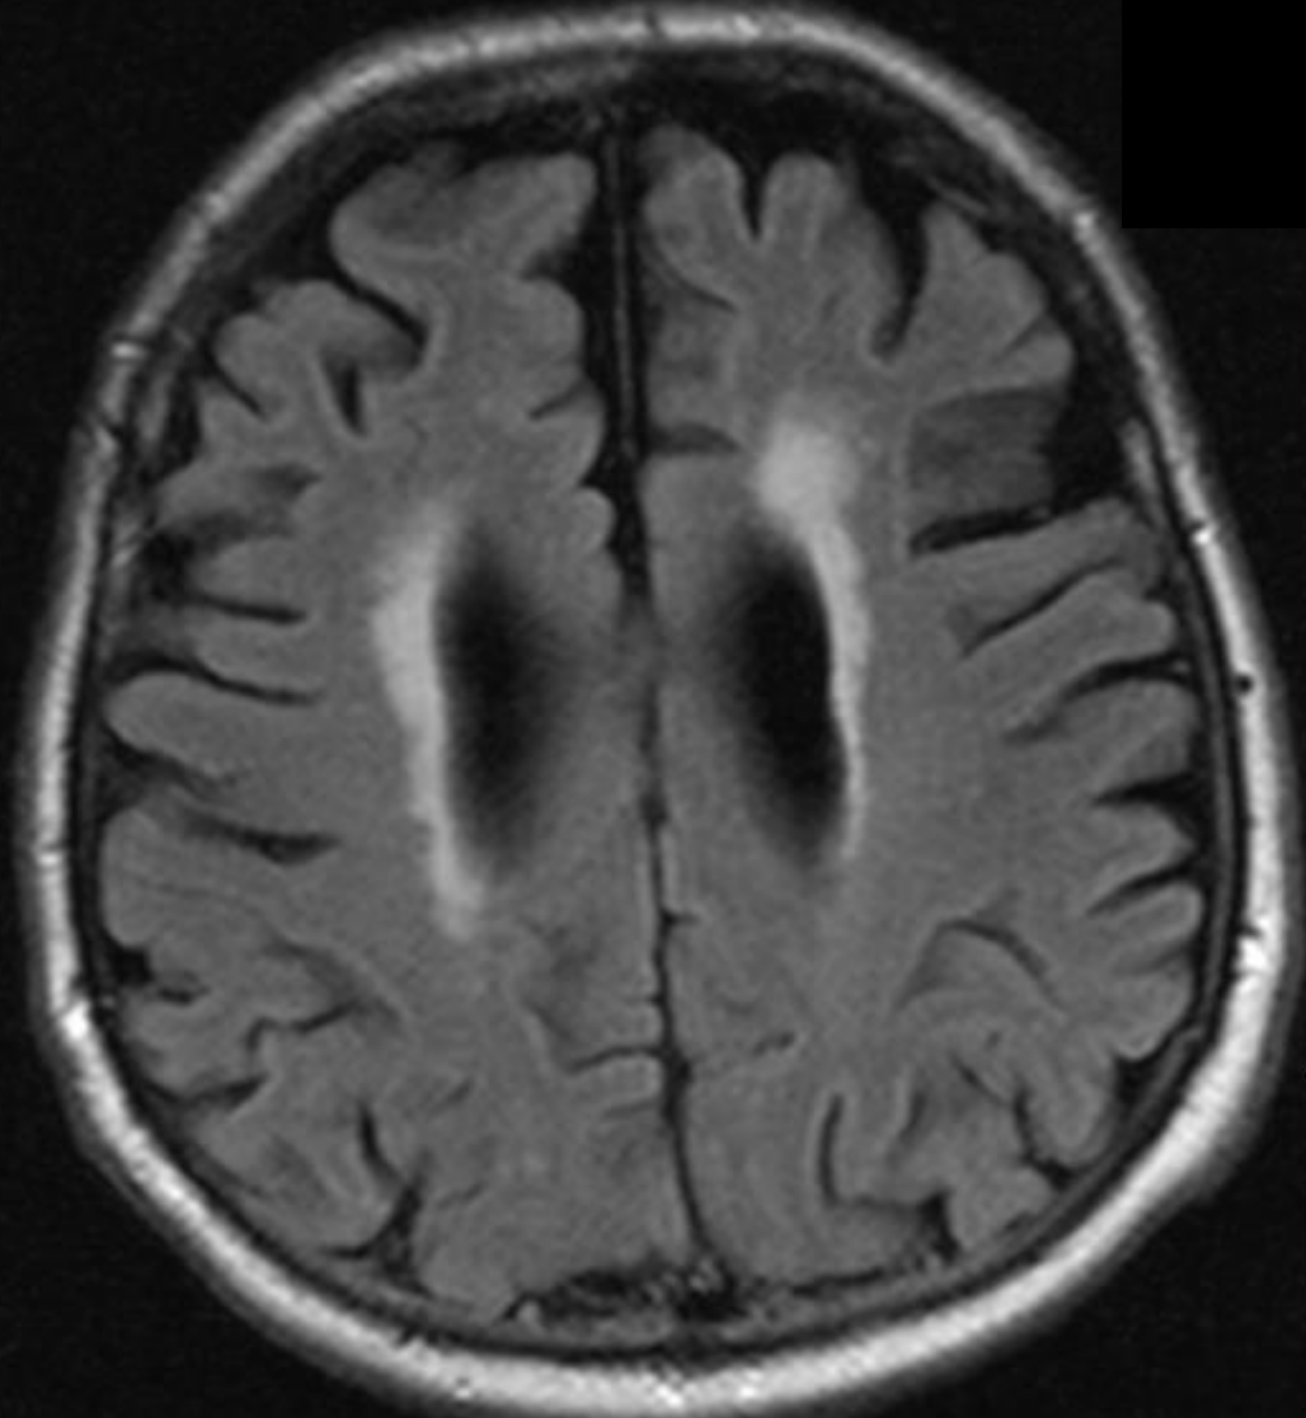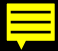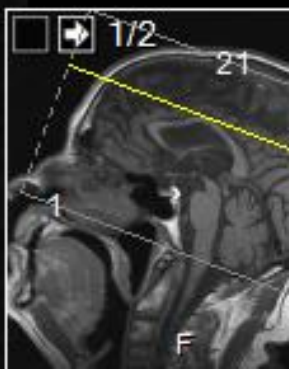

3

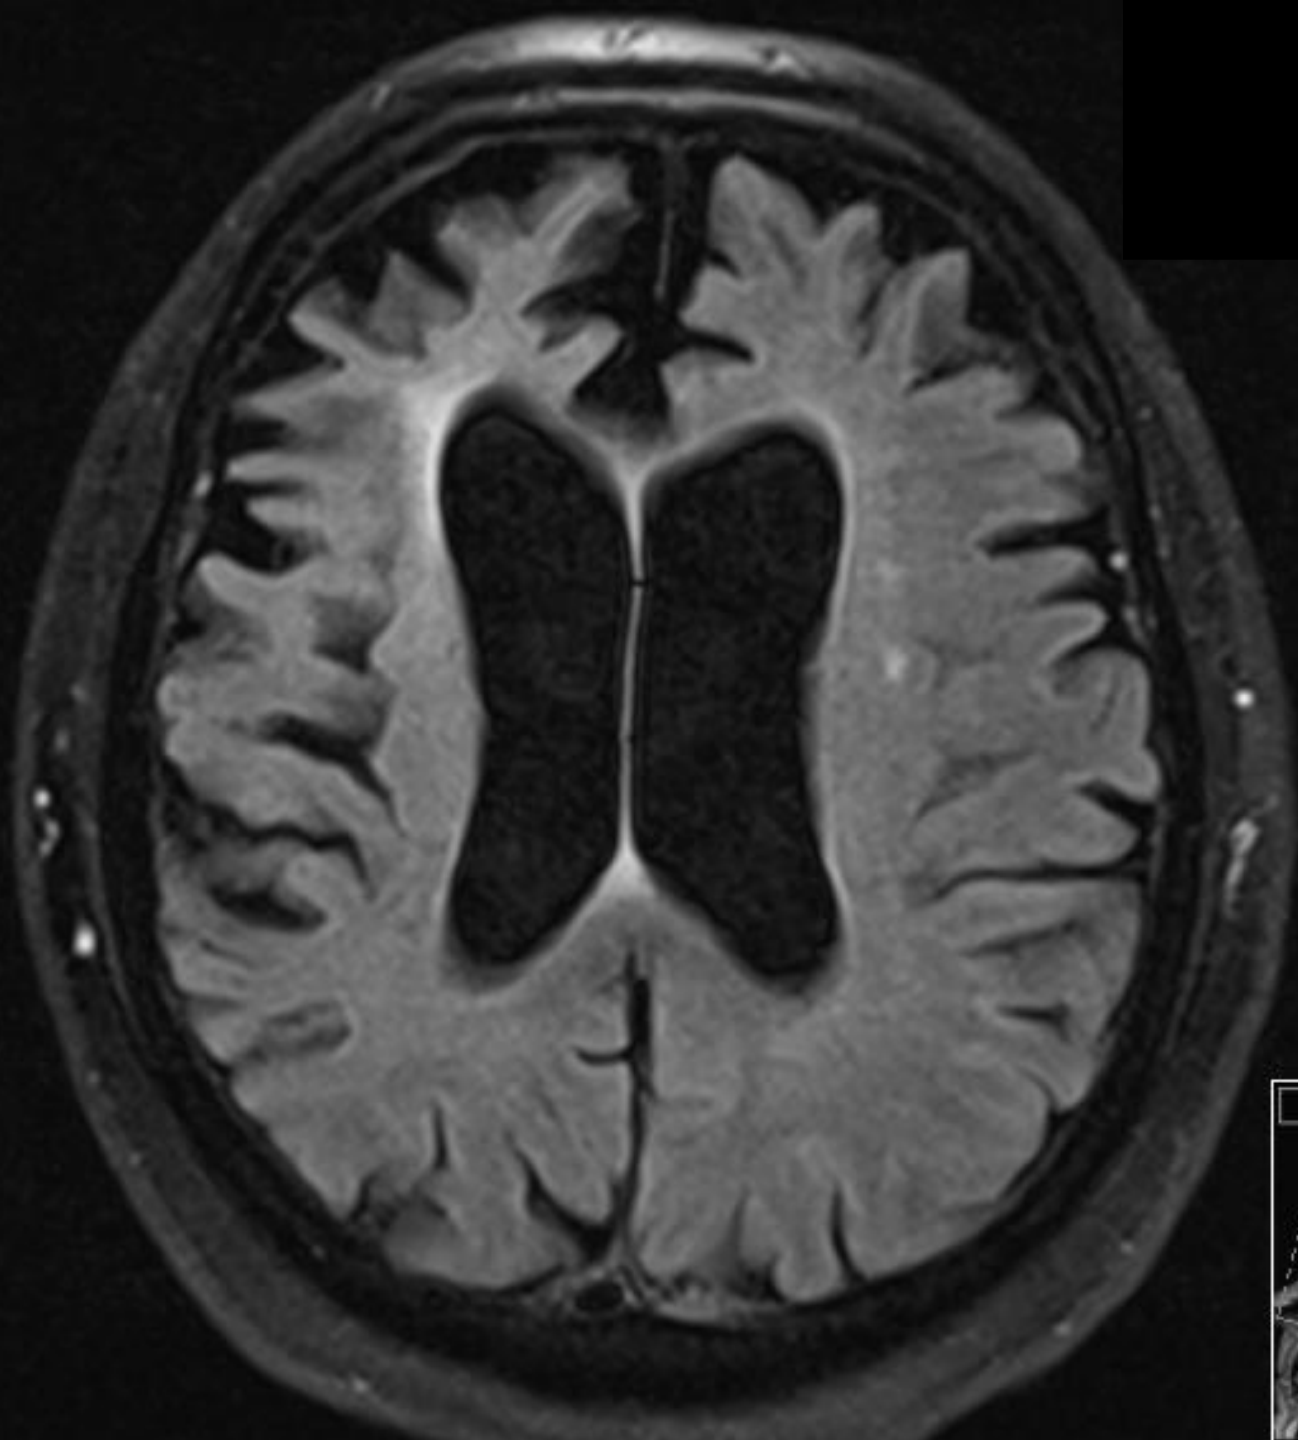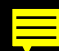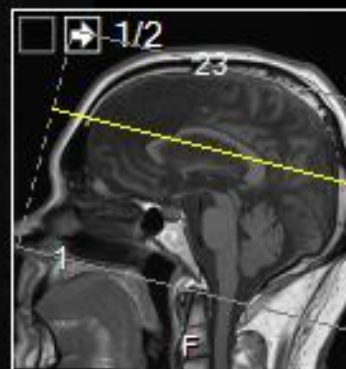

4

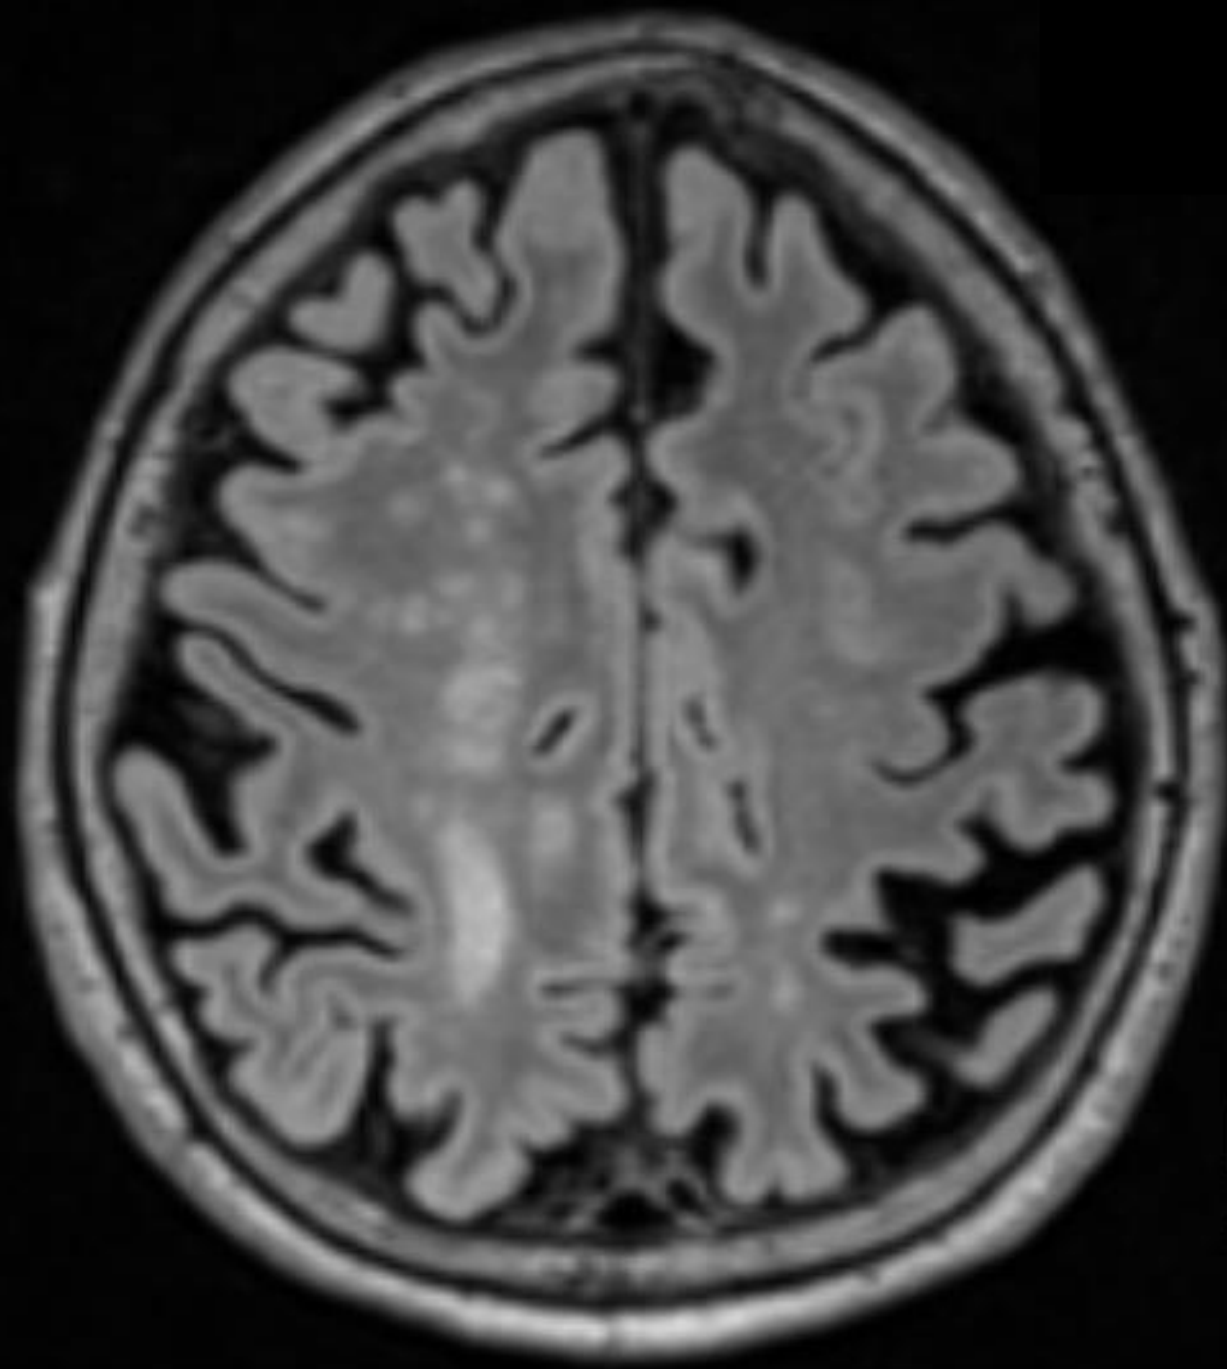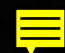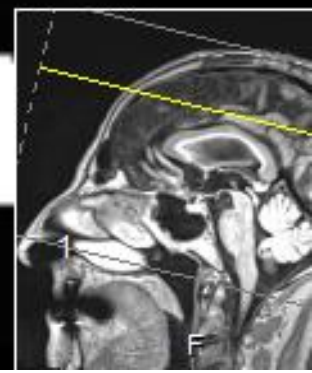

5

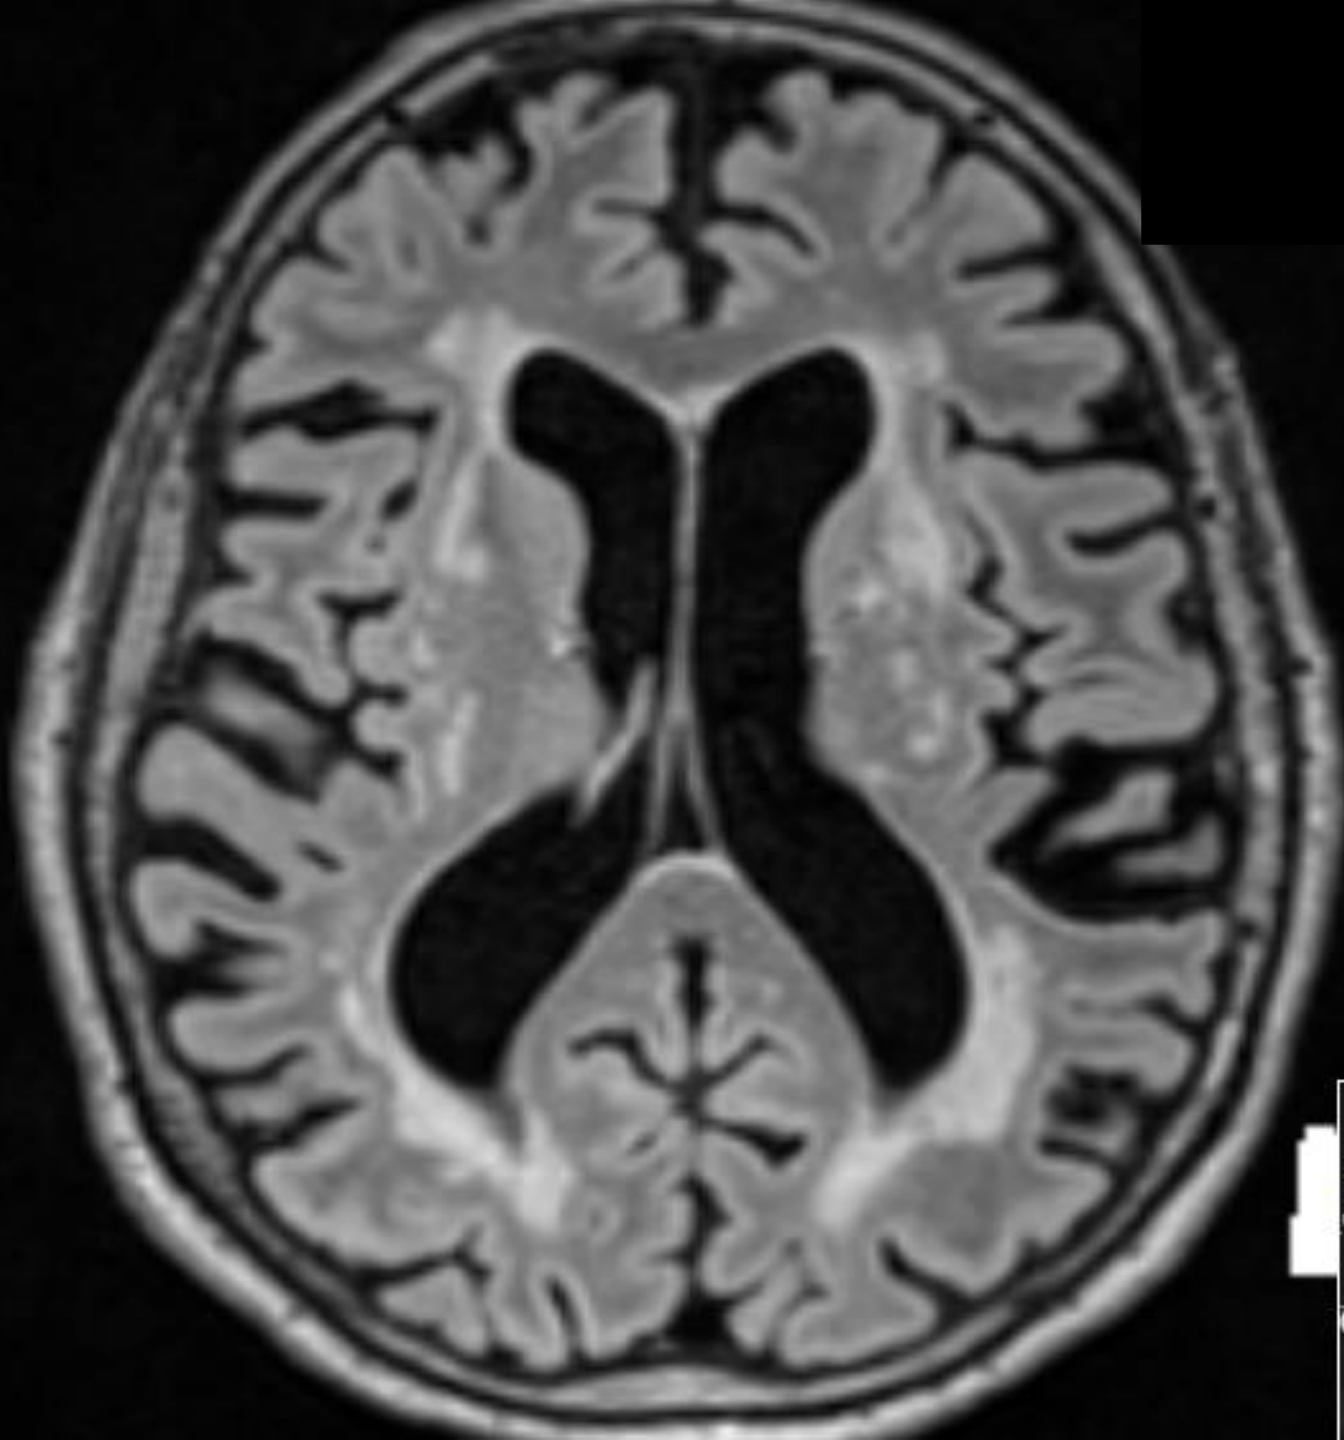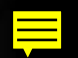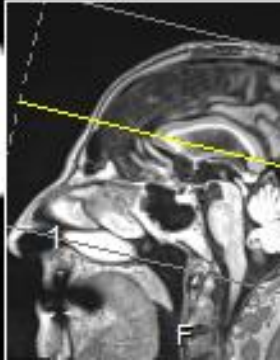

6

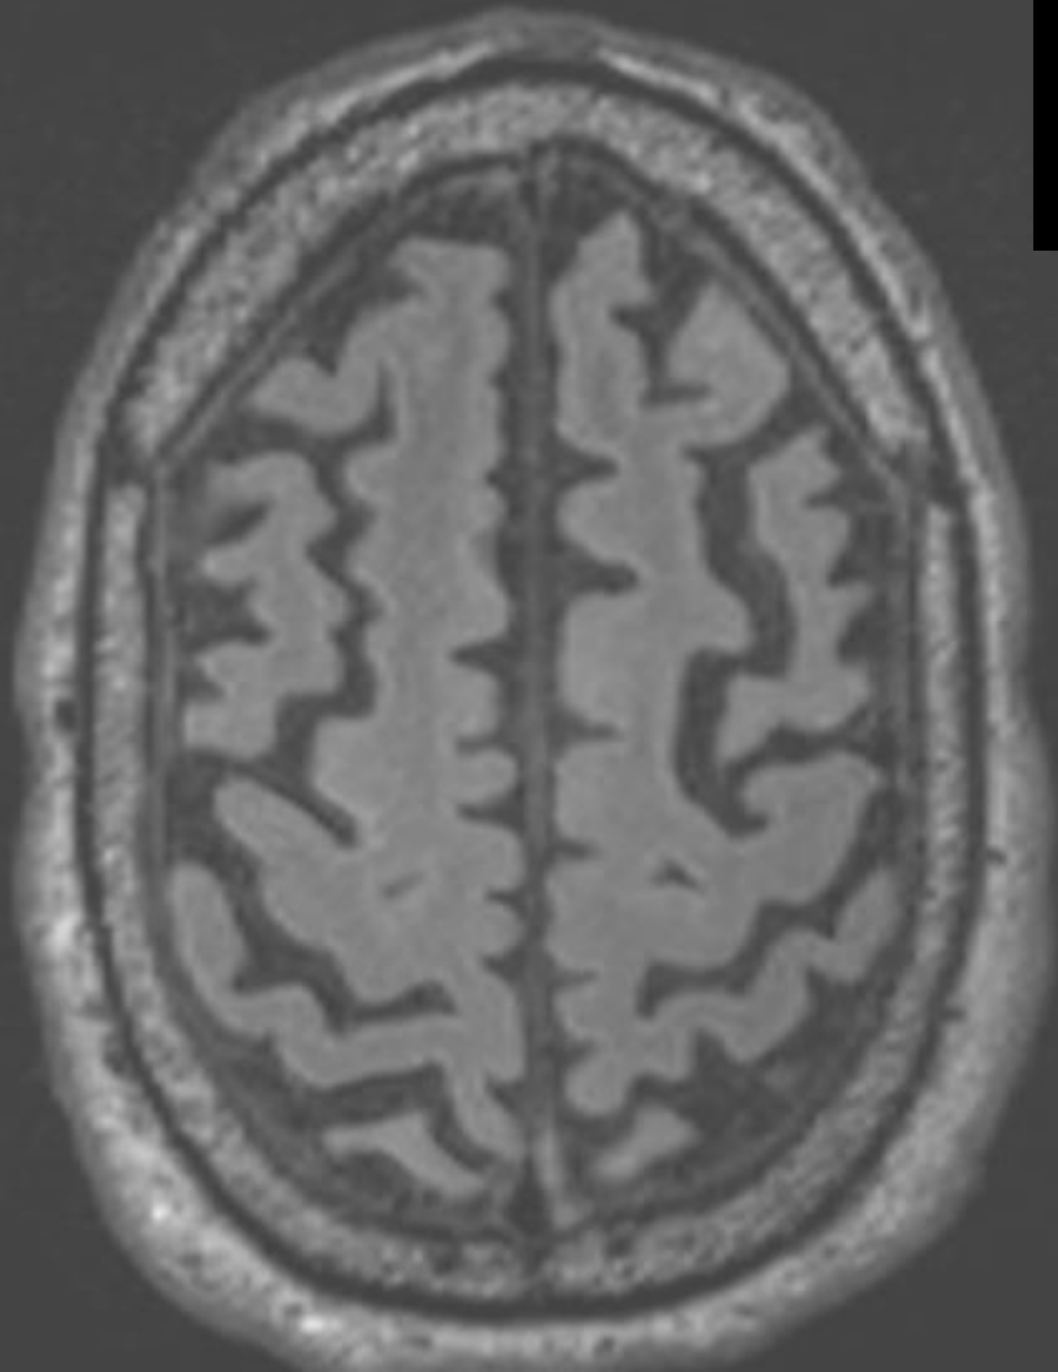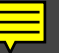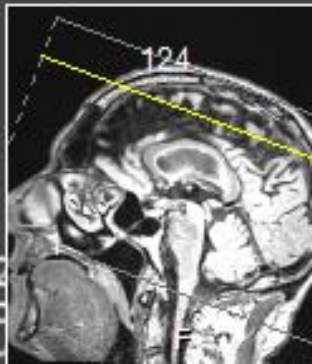

7

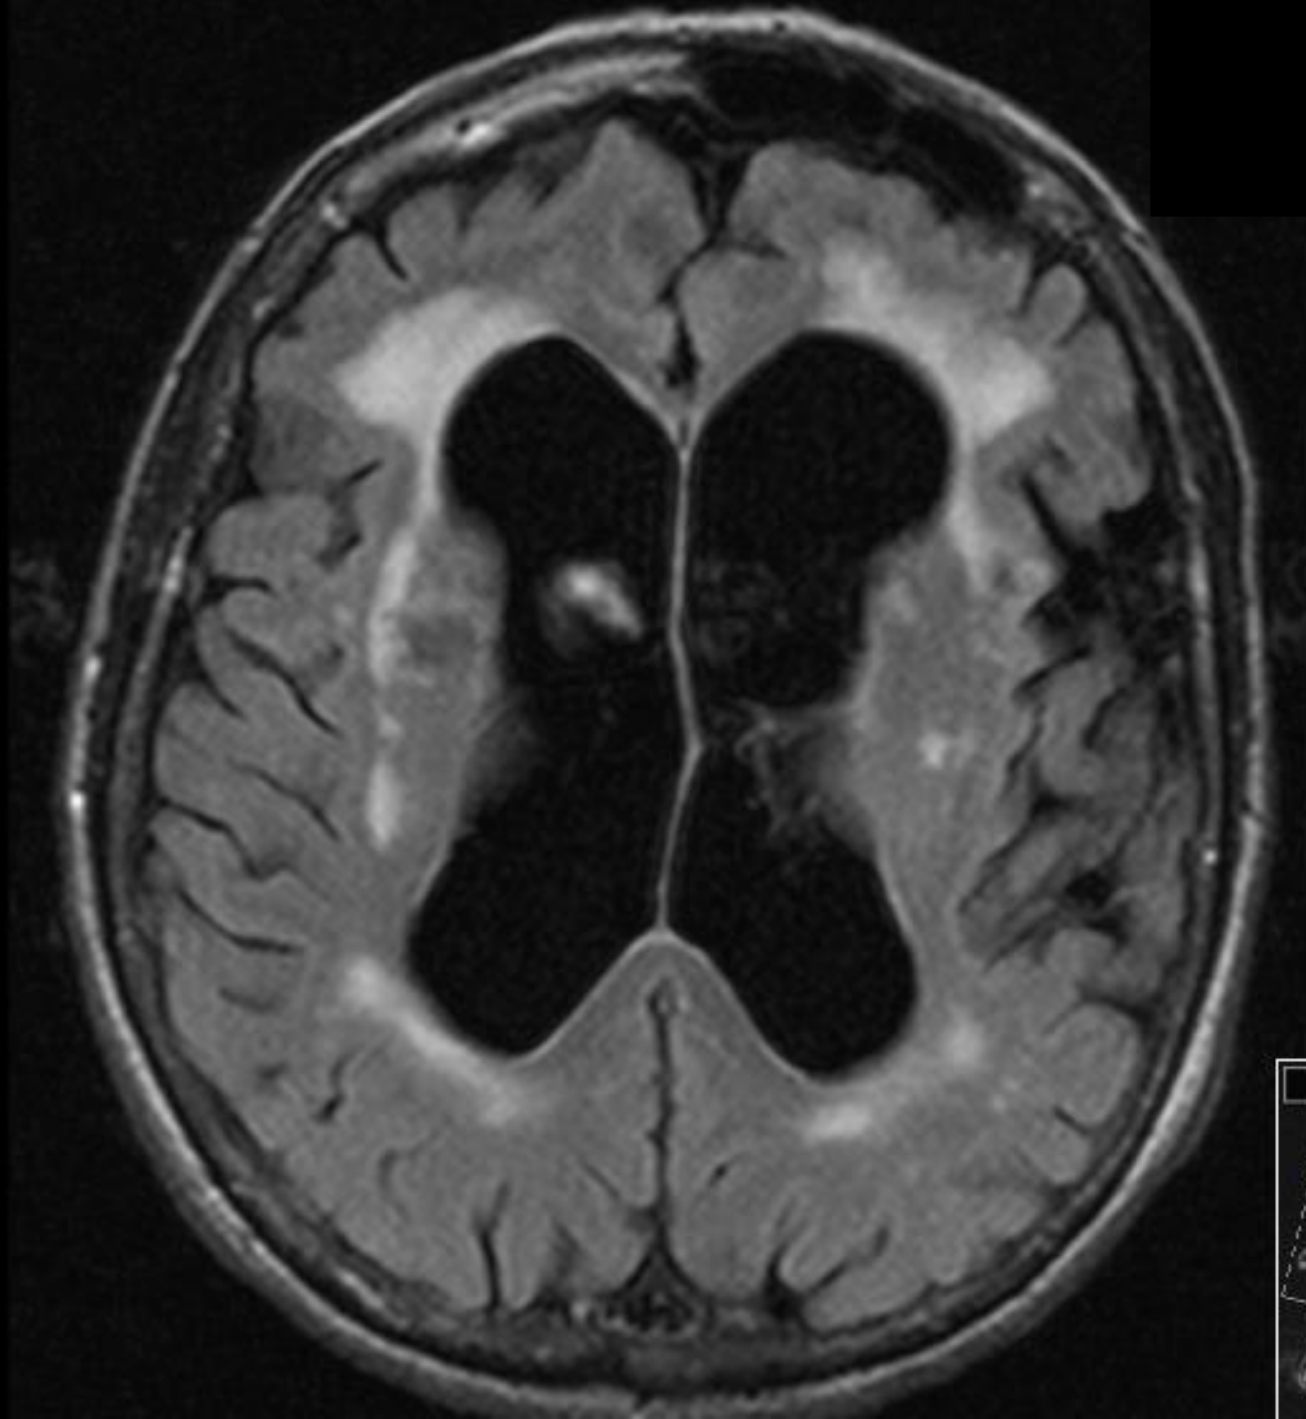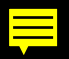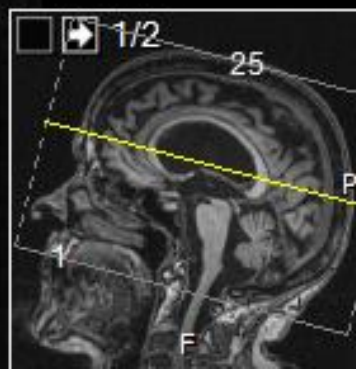

8

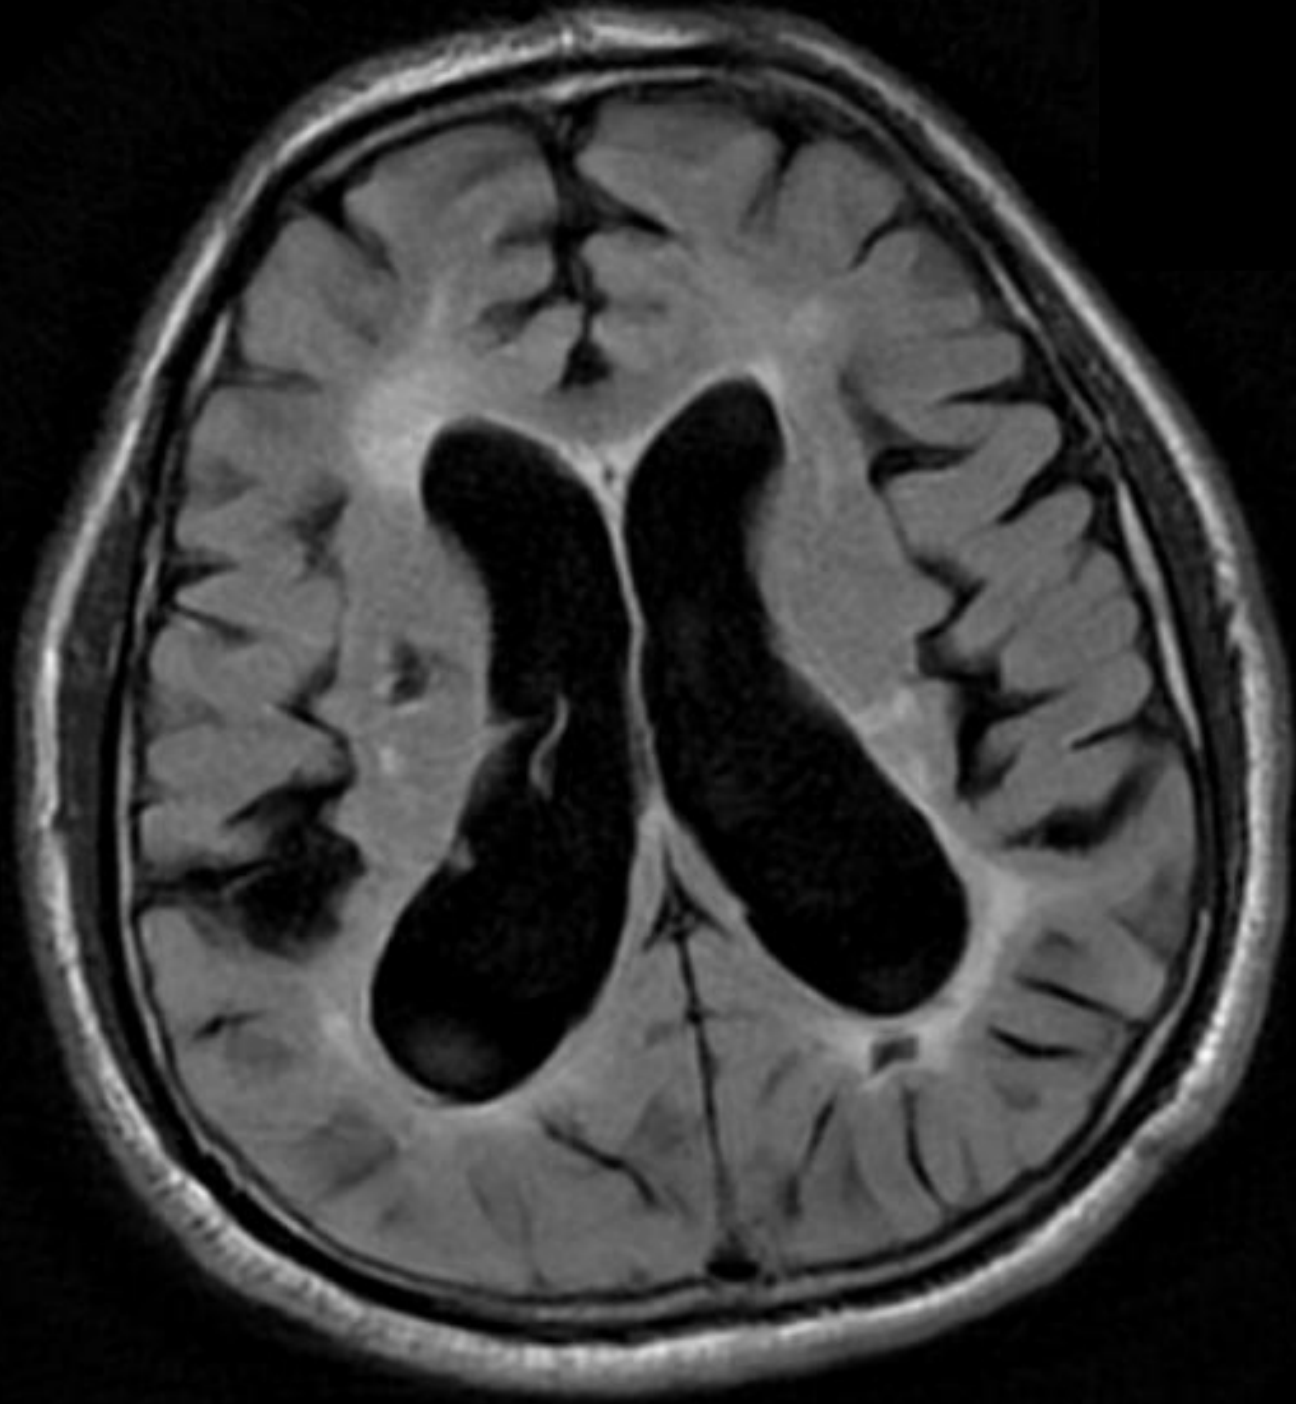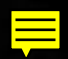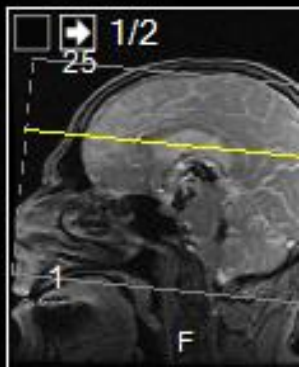



9

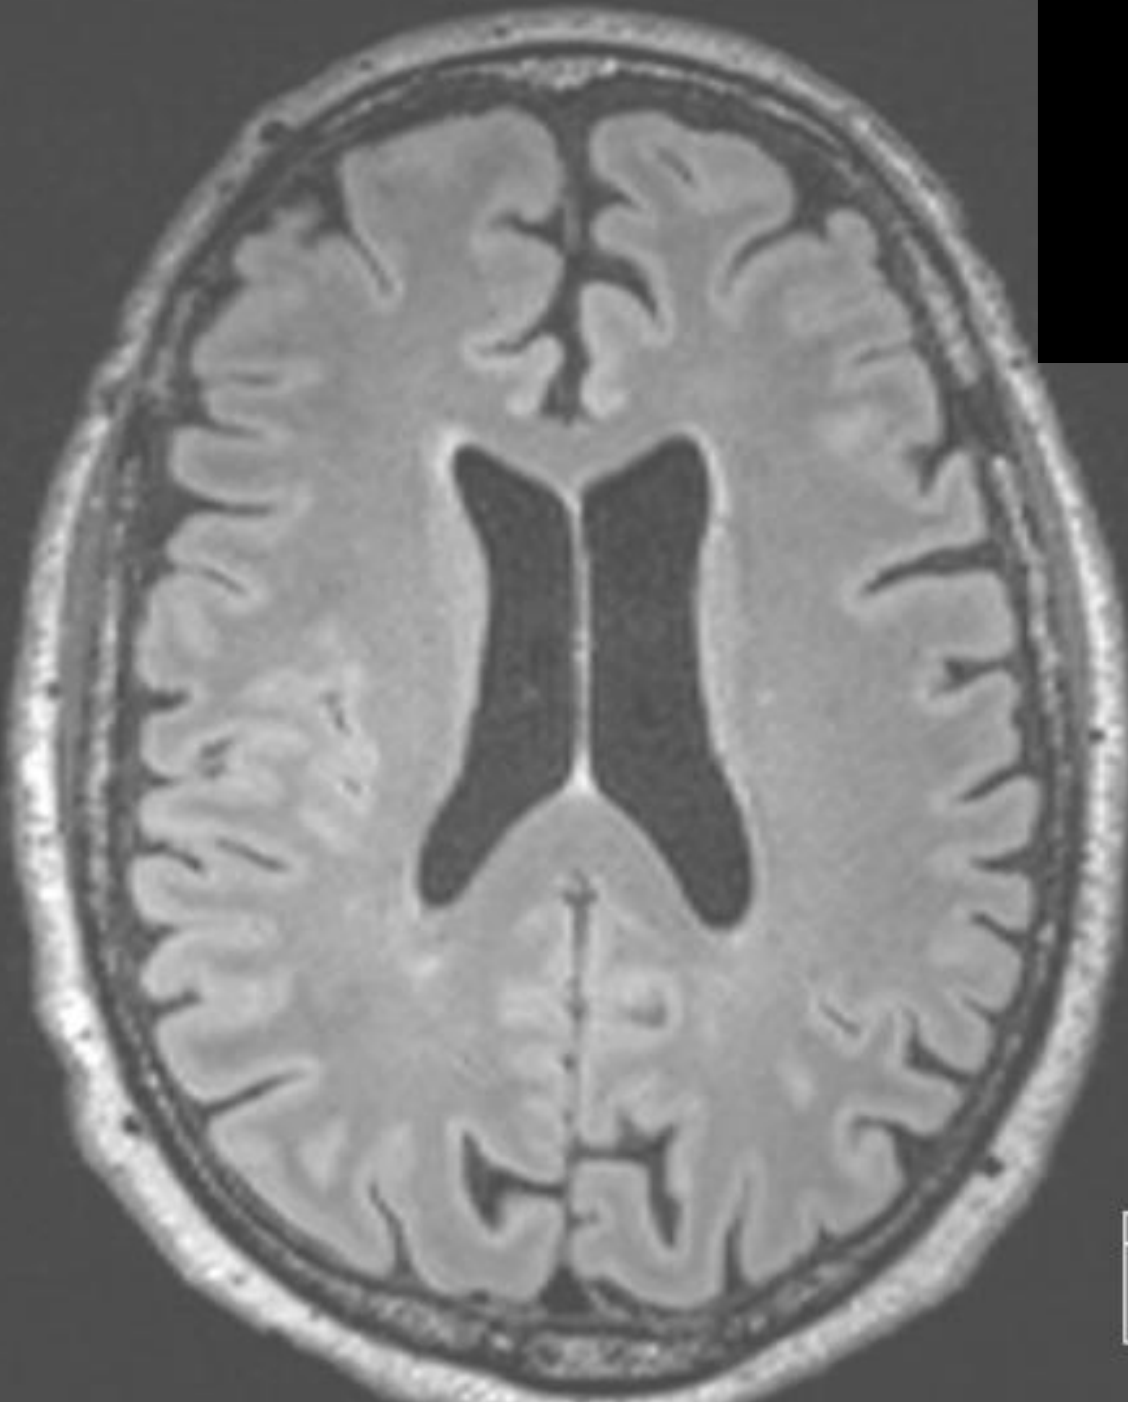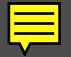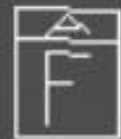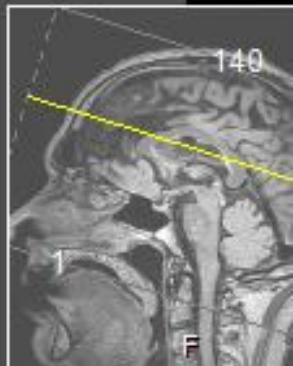

10

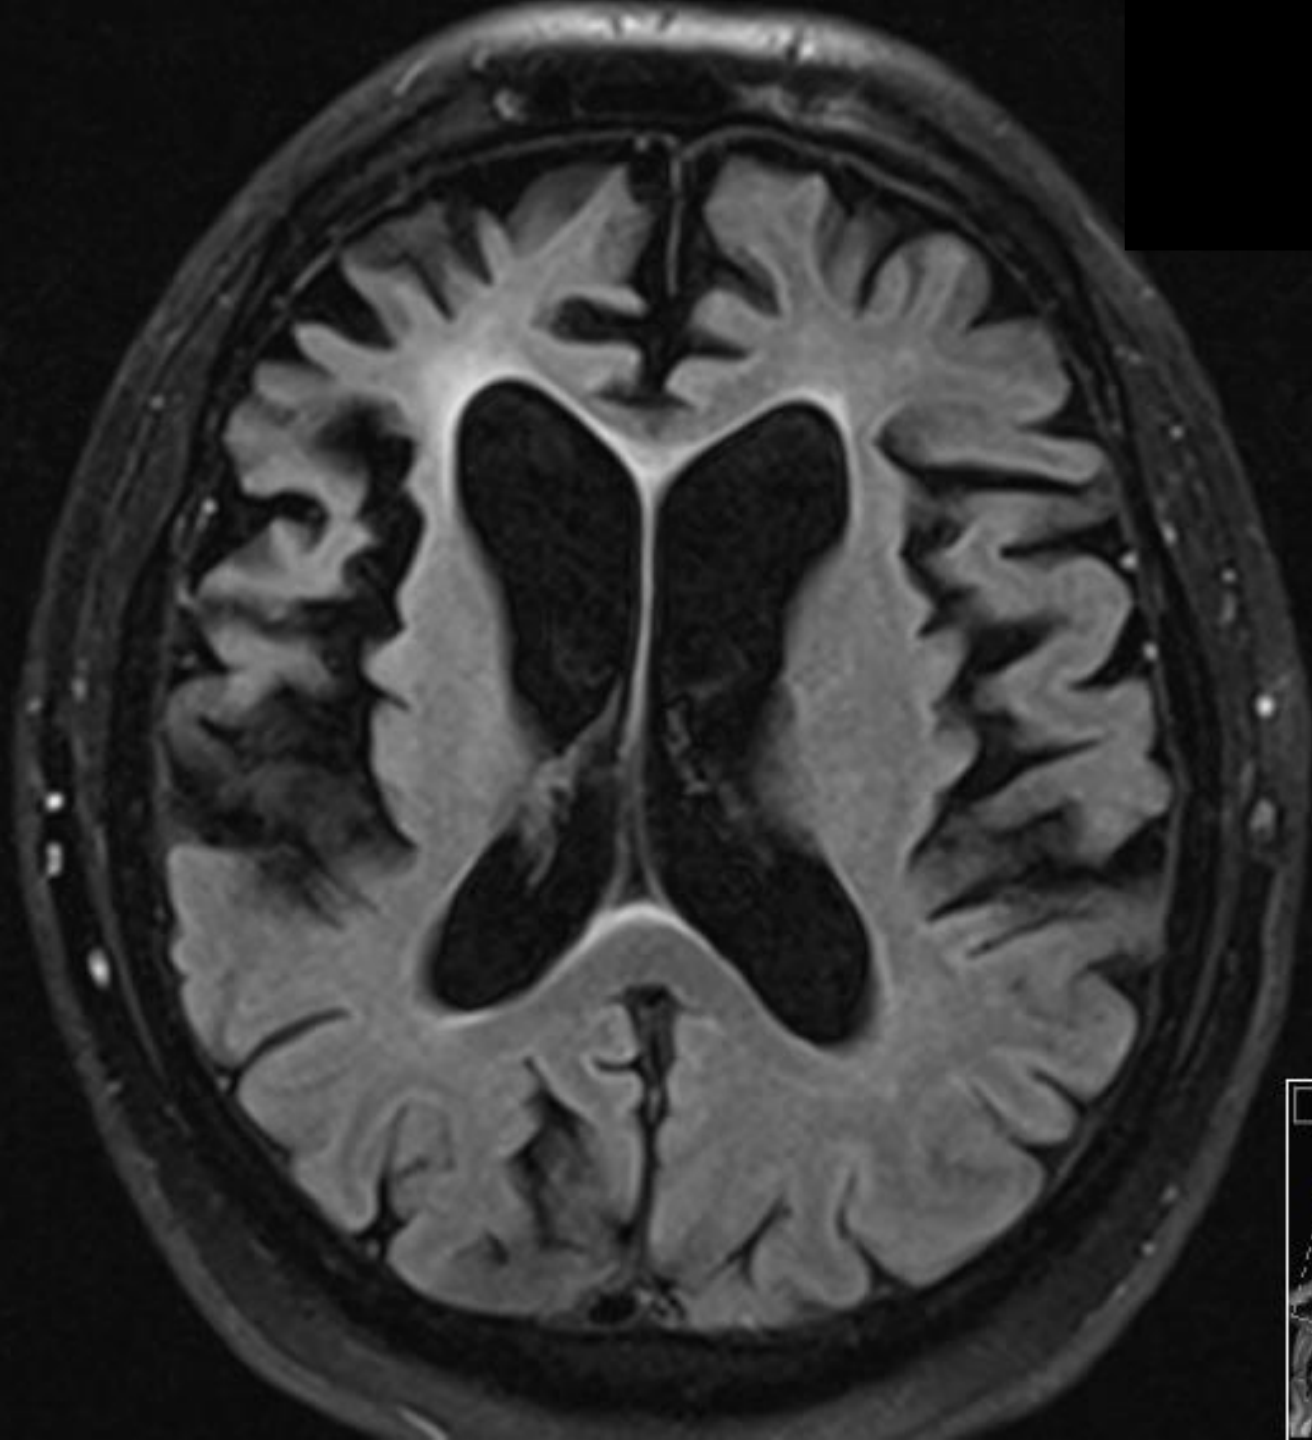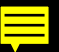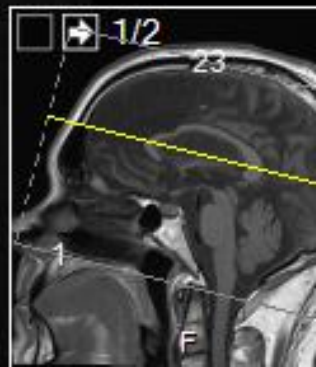

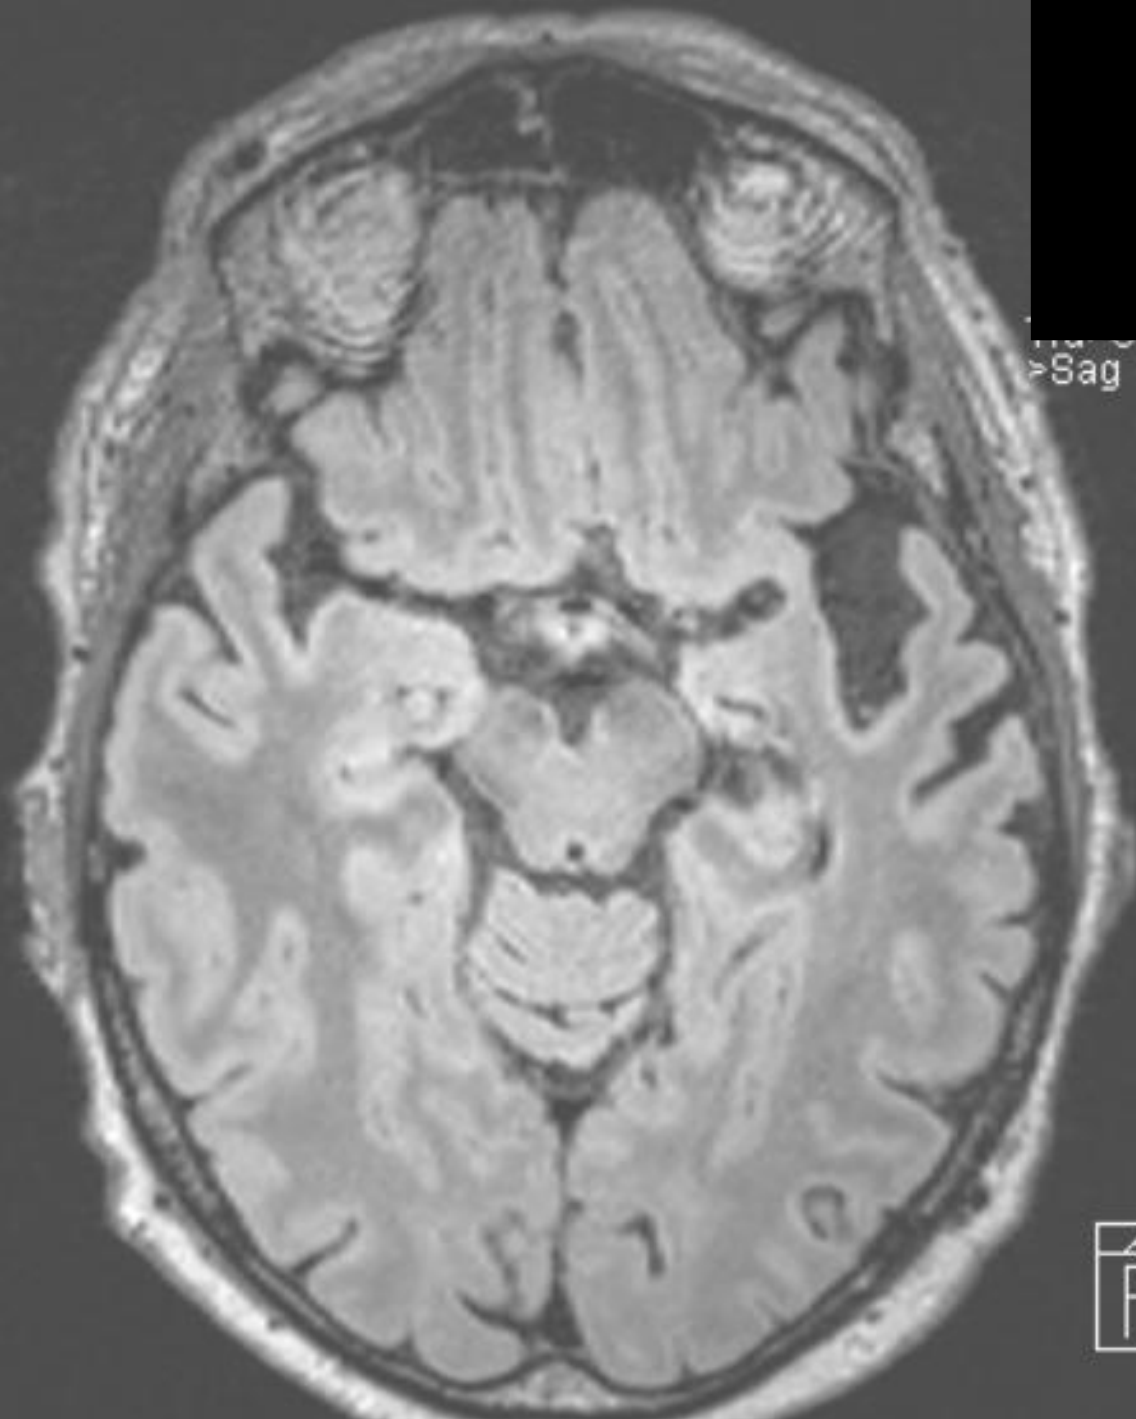

Sag -0

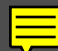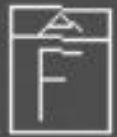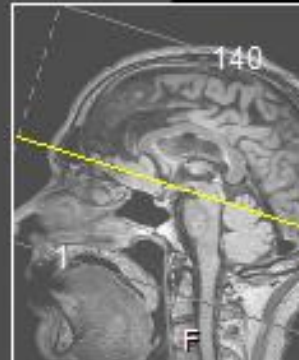

12

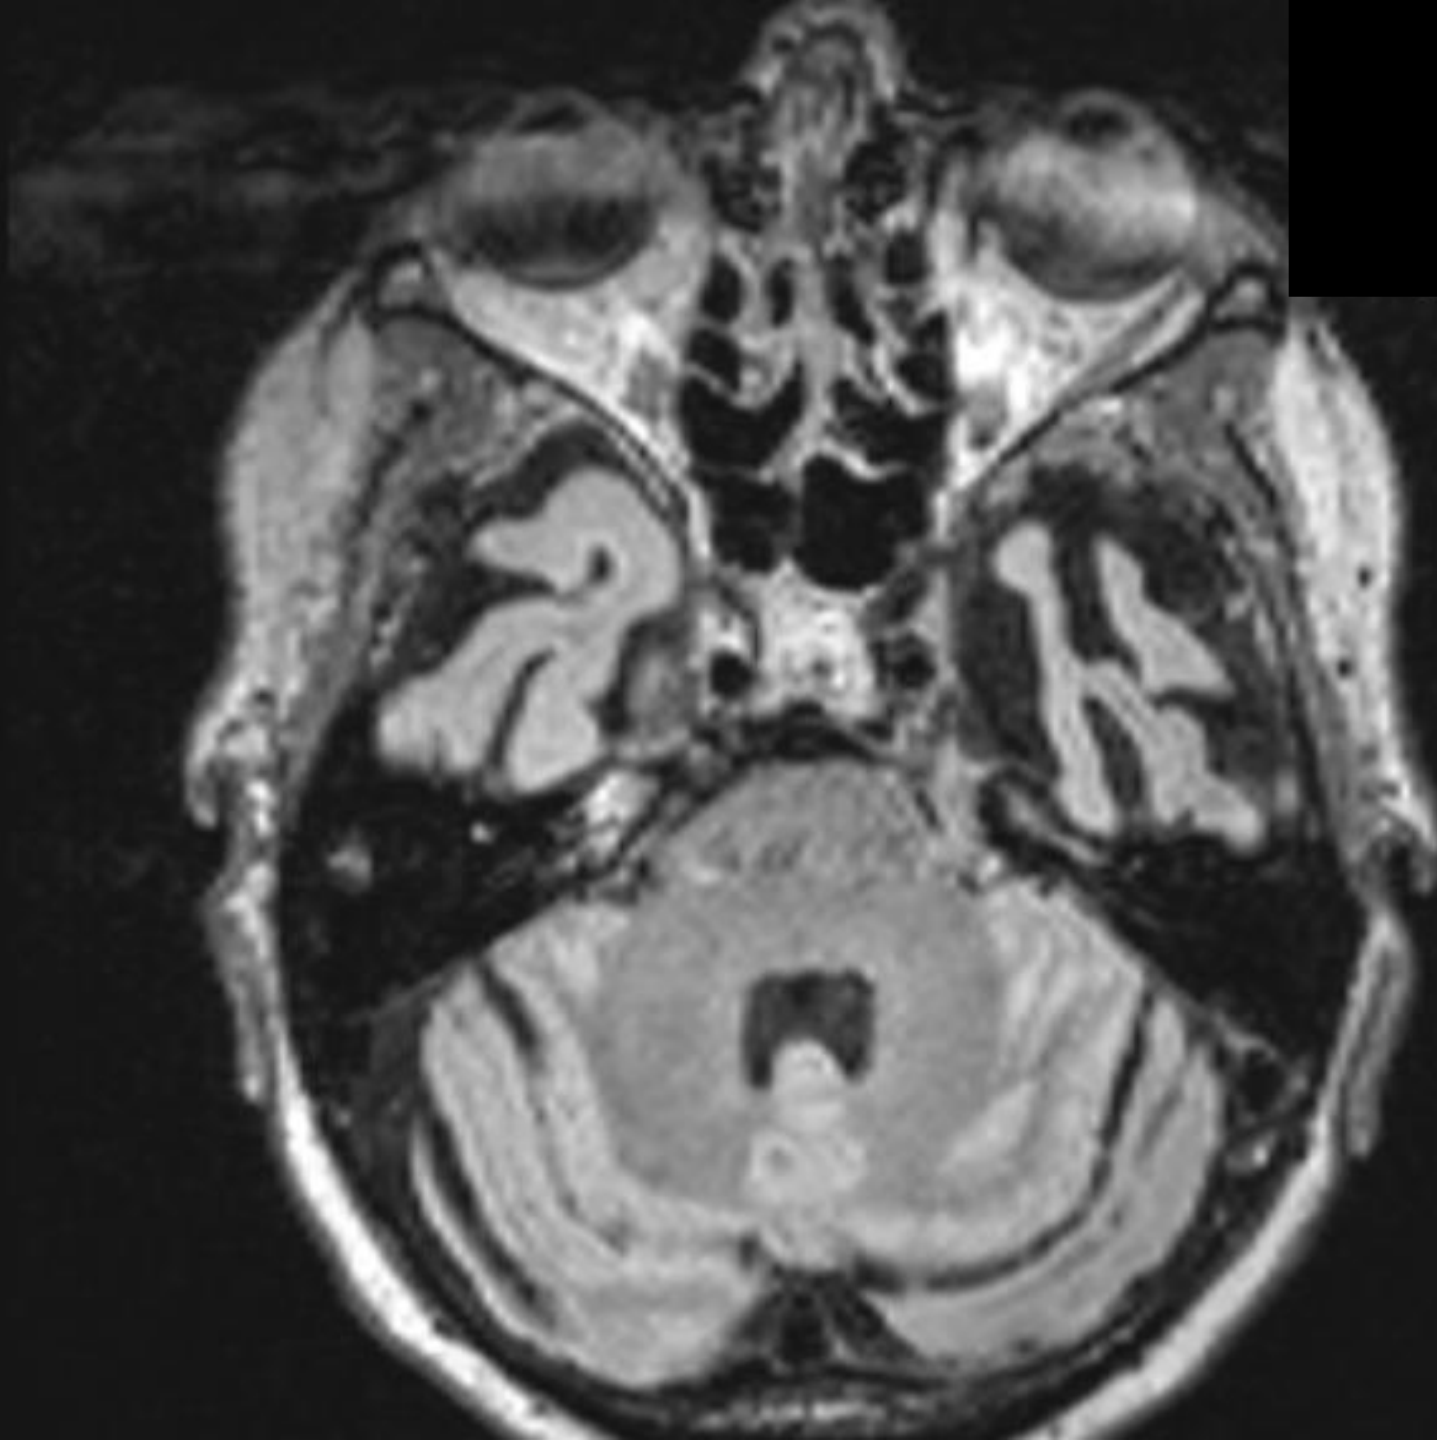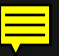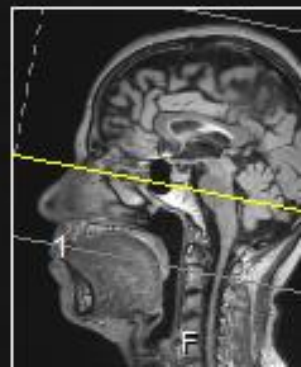

13

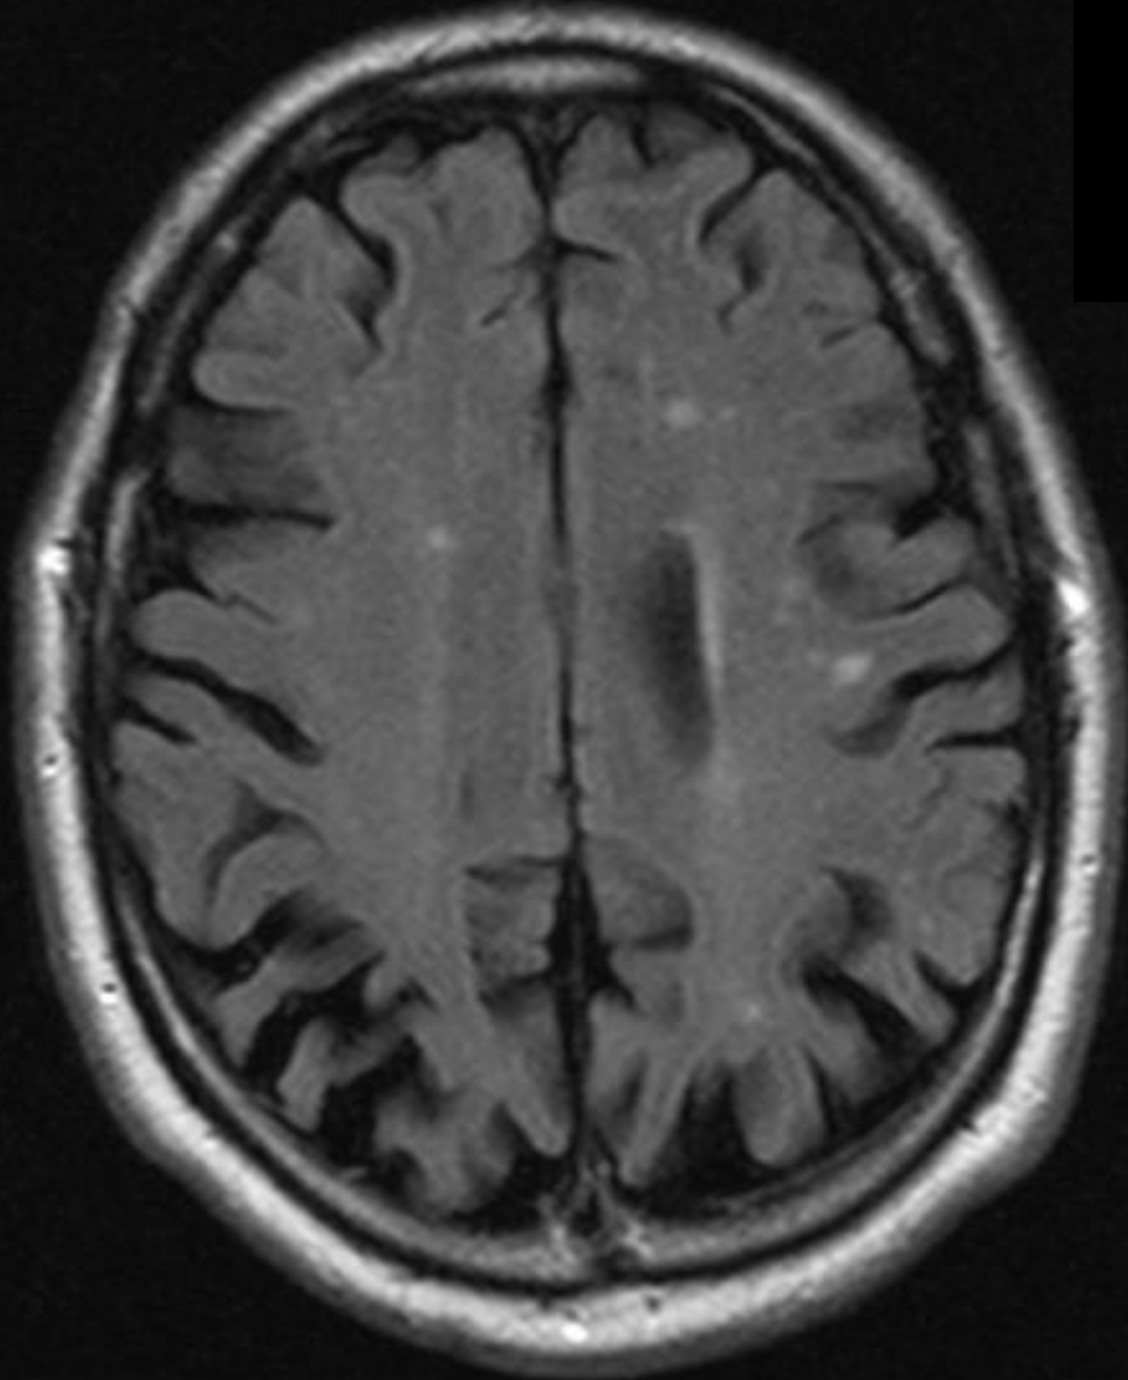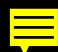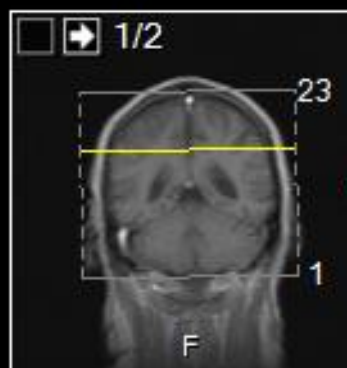

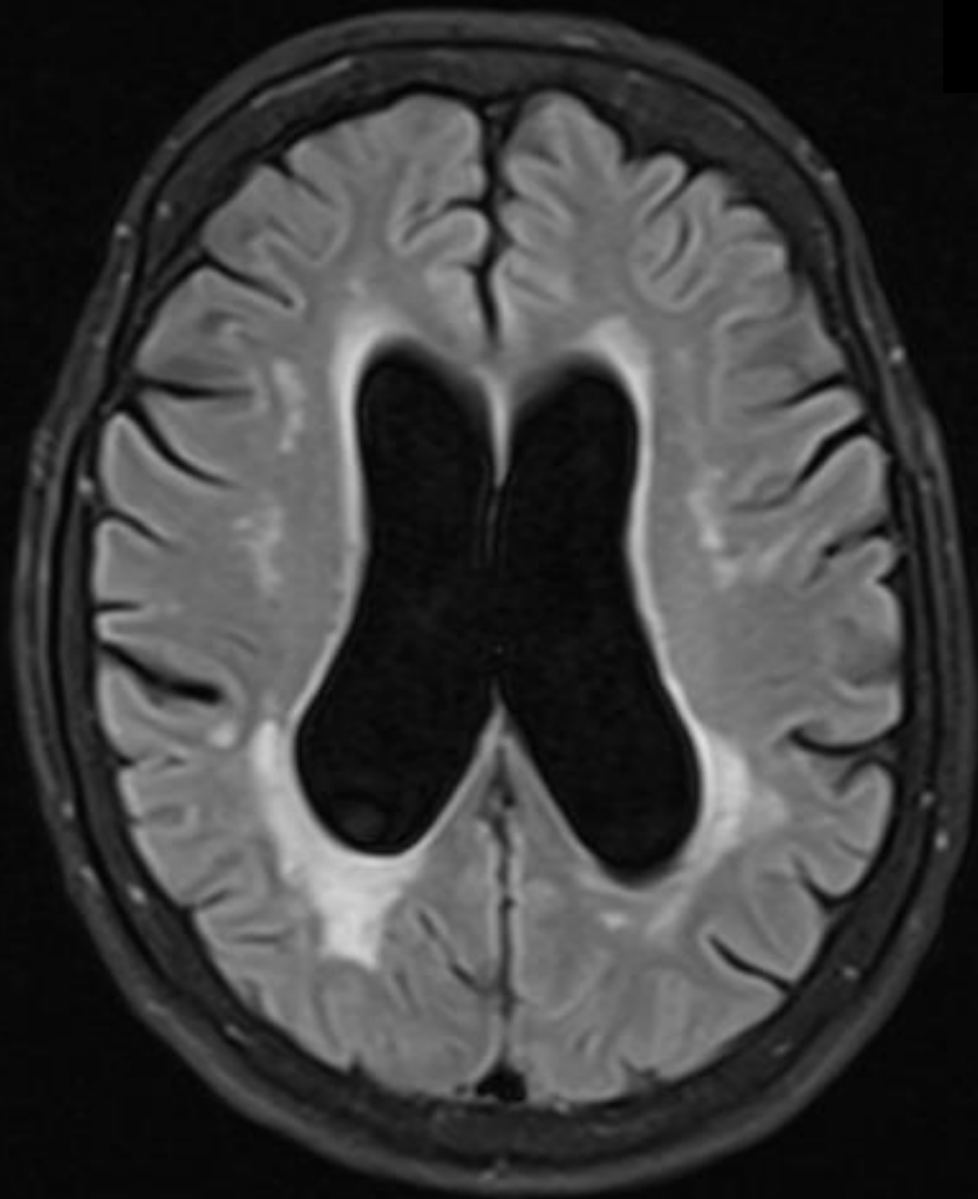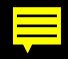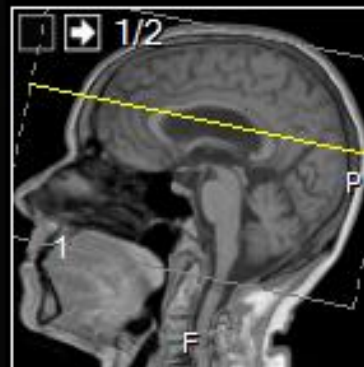

15

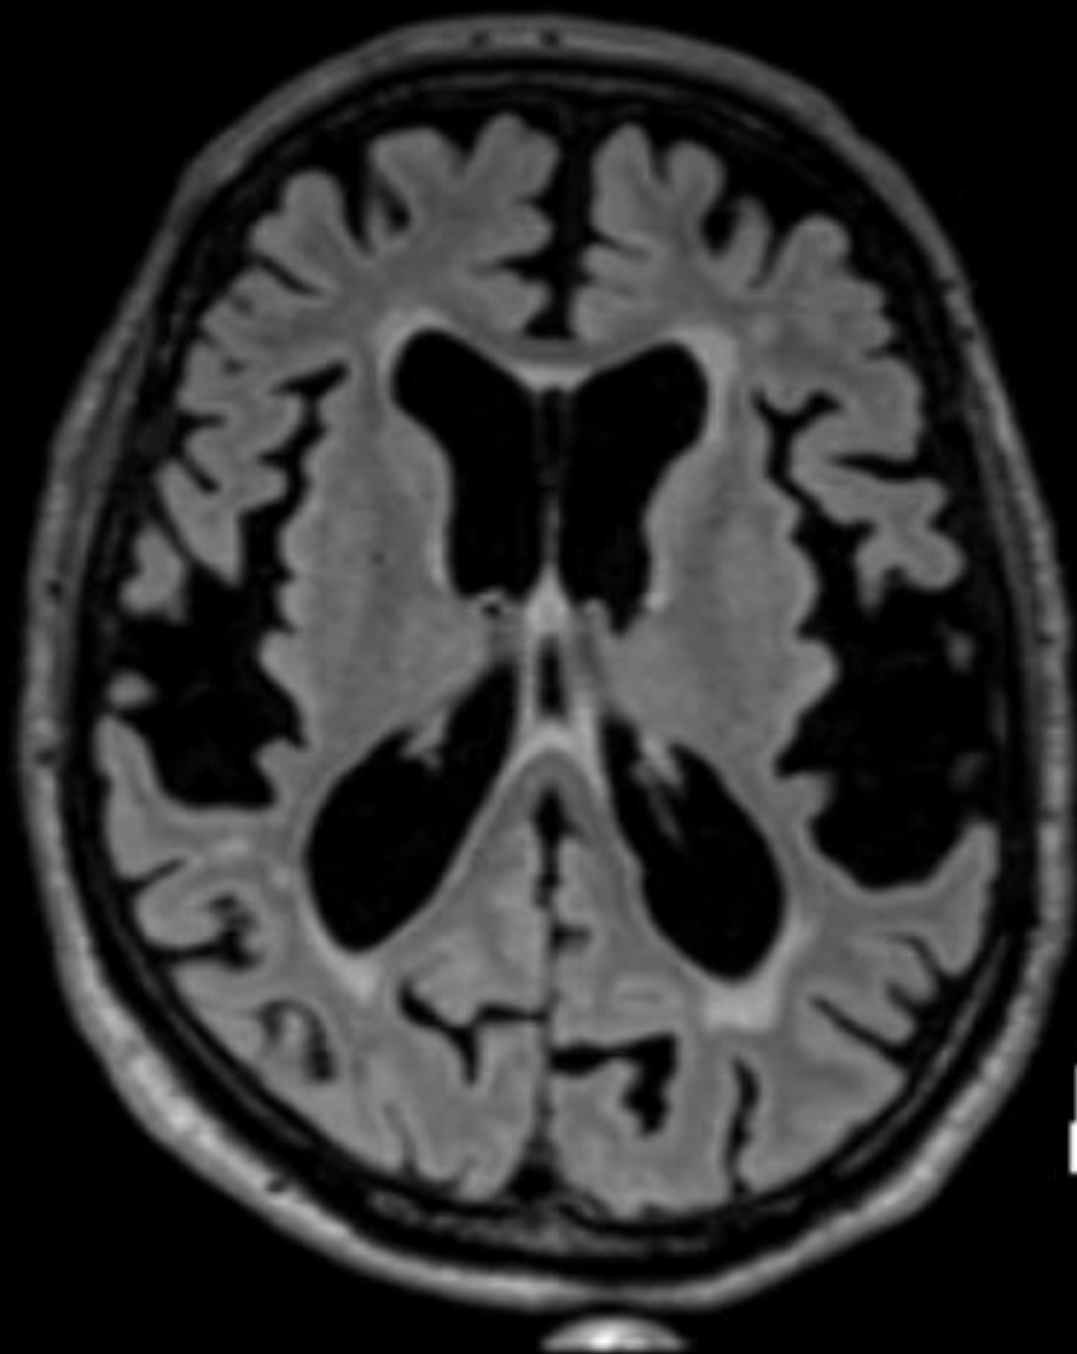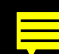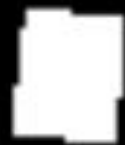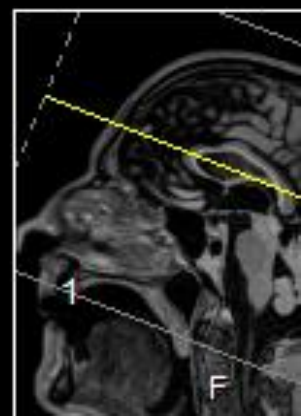

16

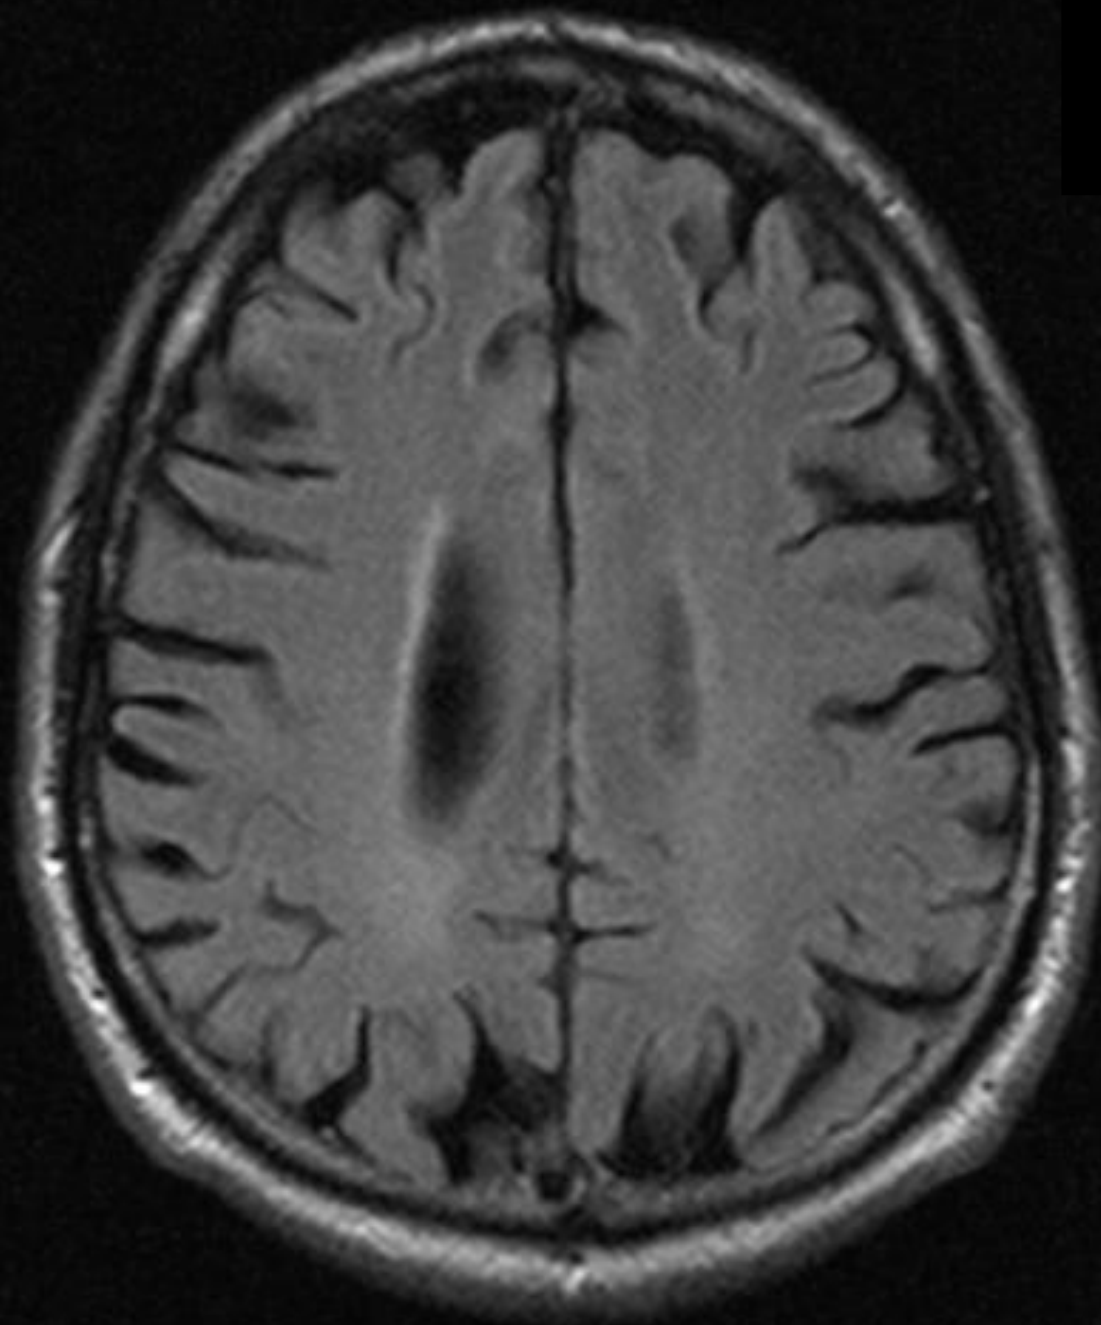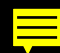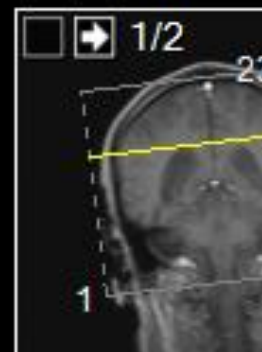



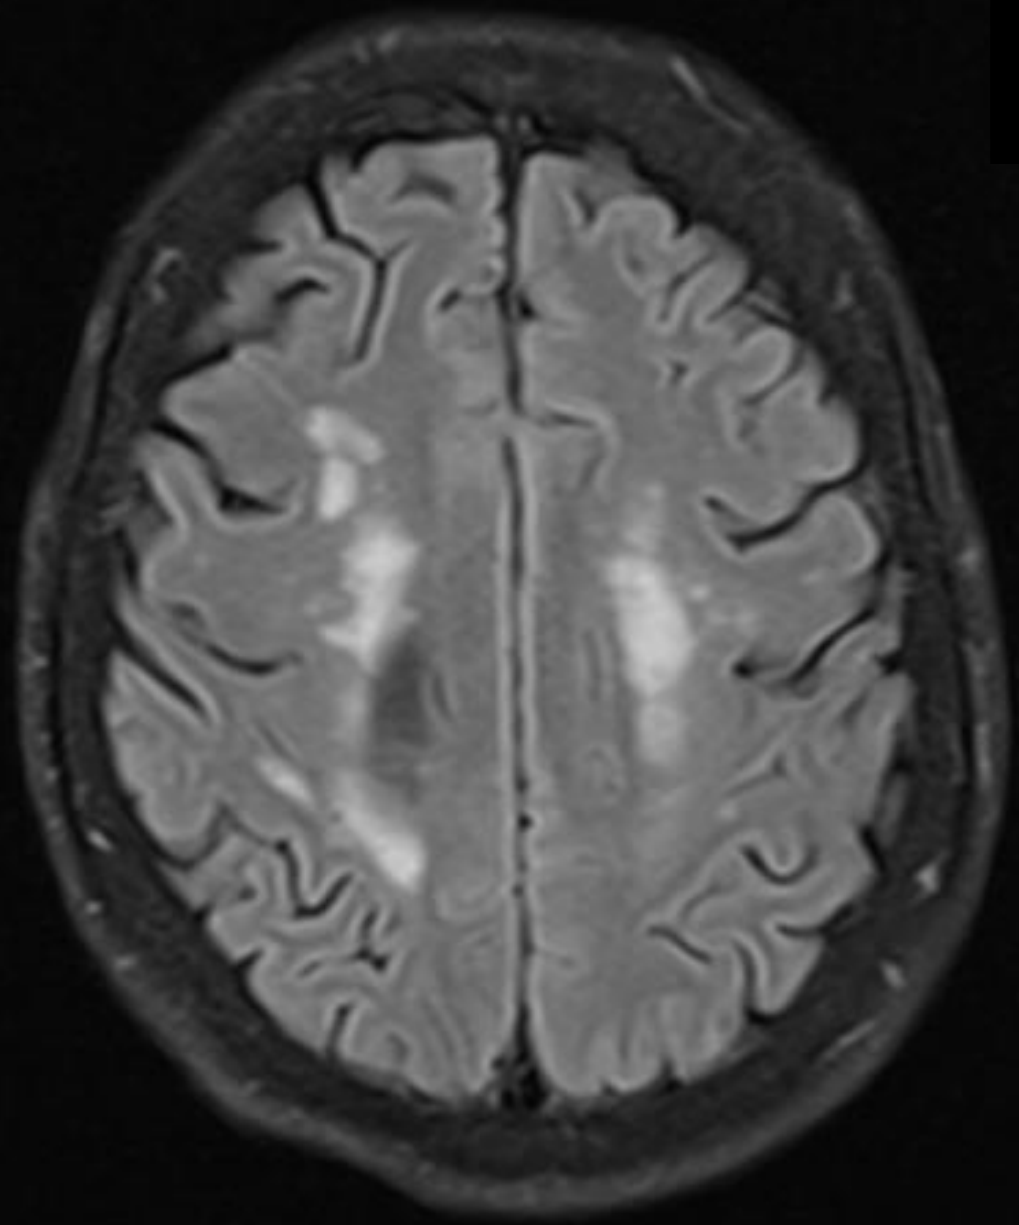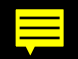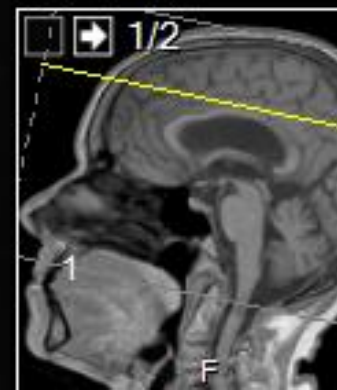

18

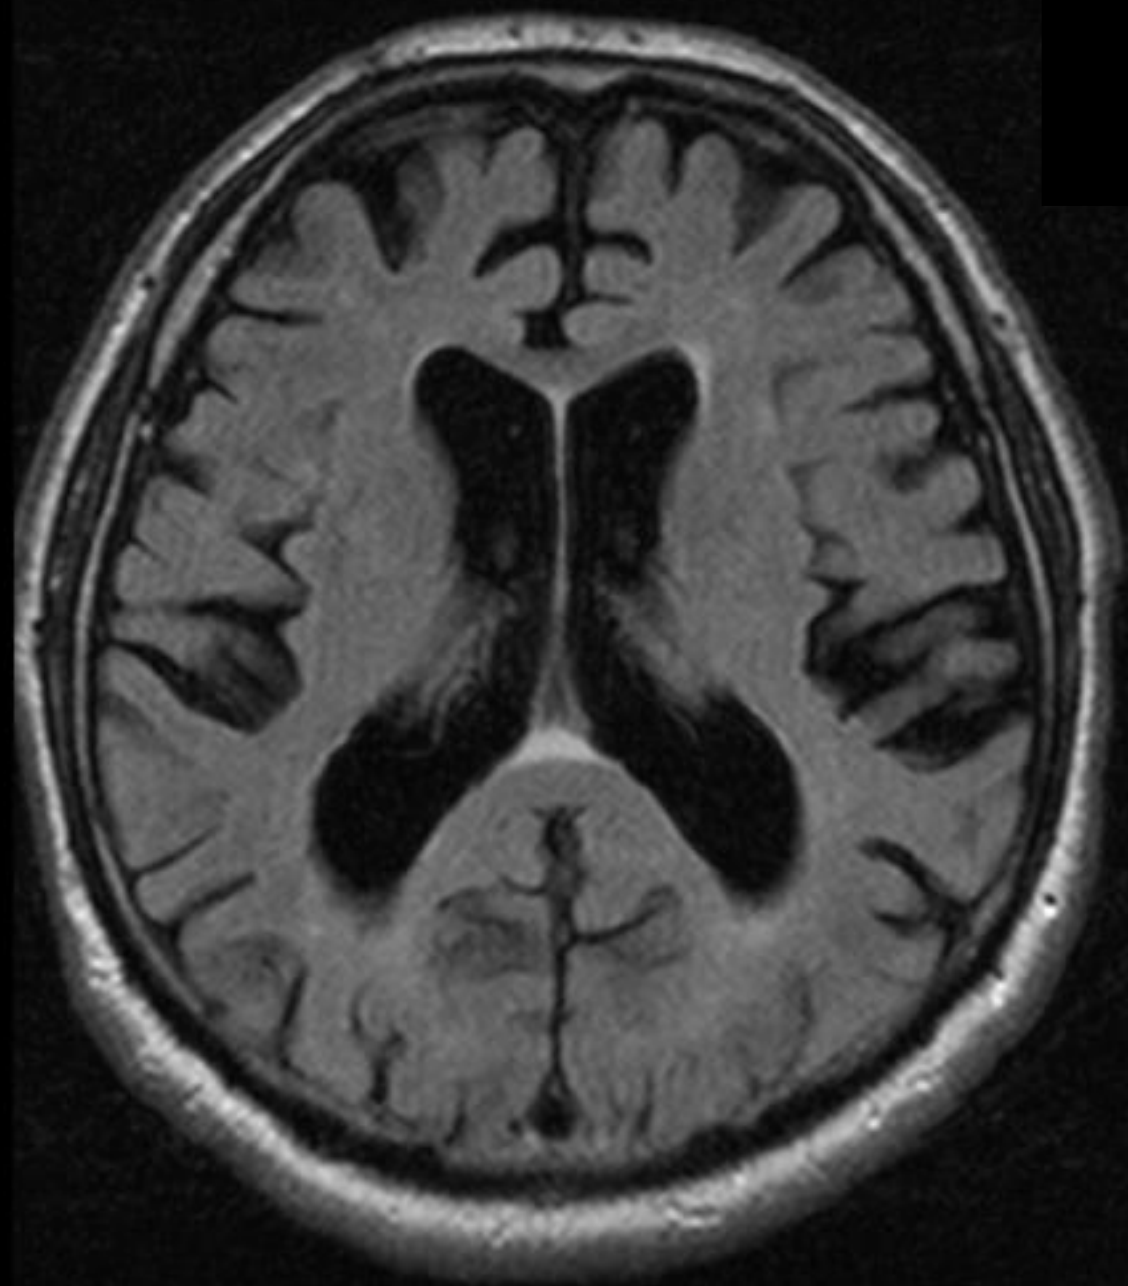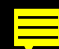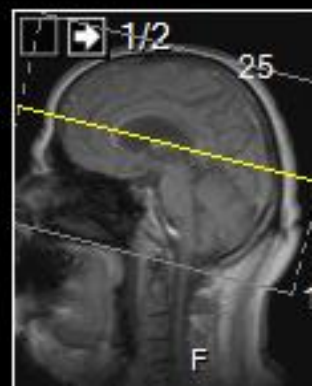

19

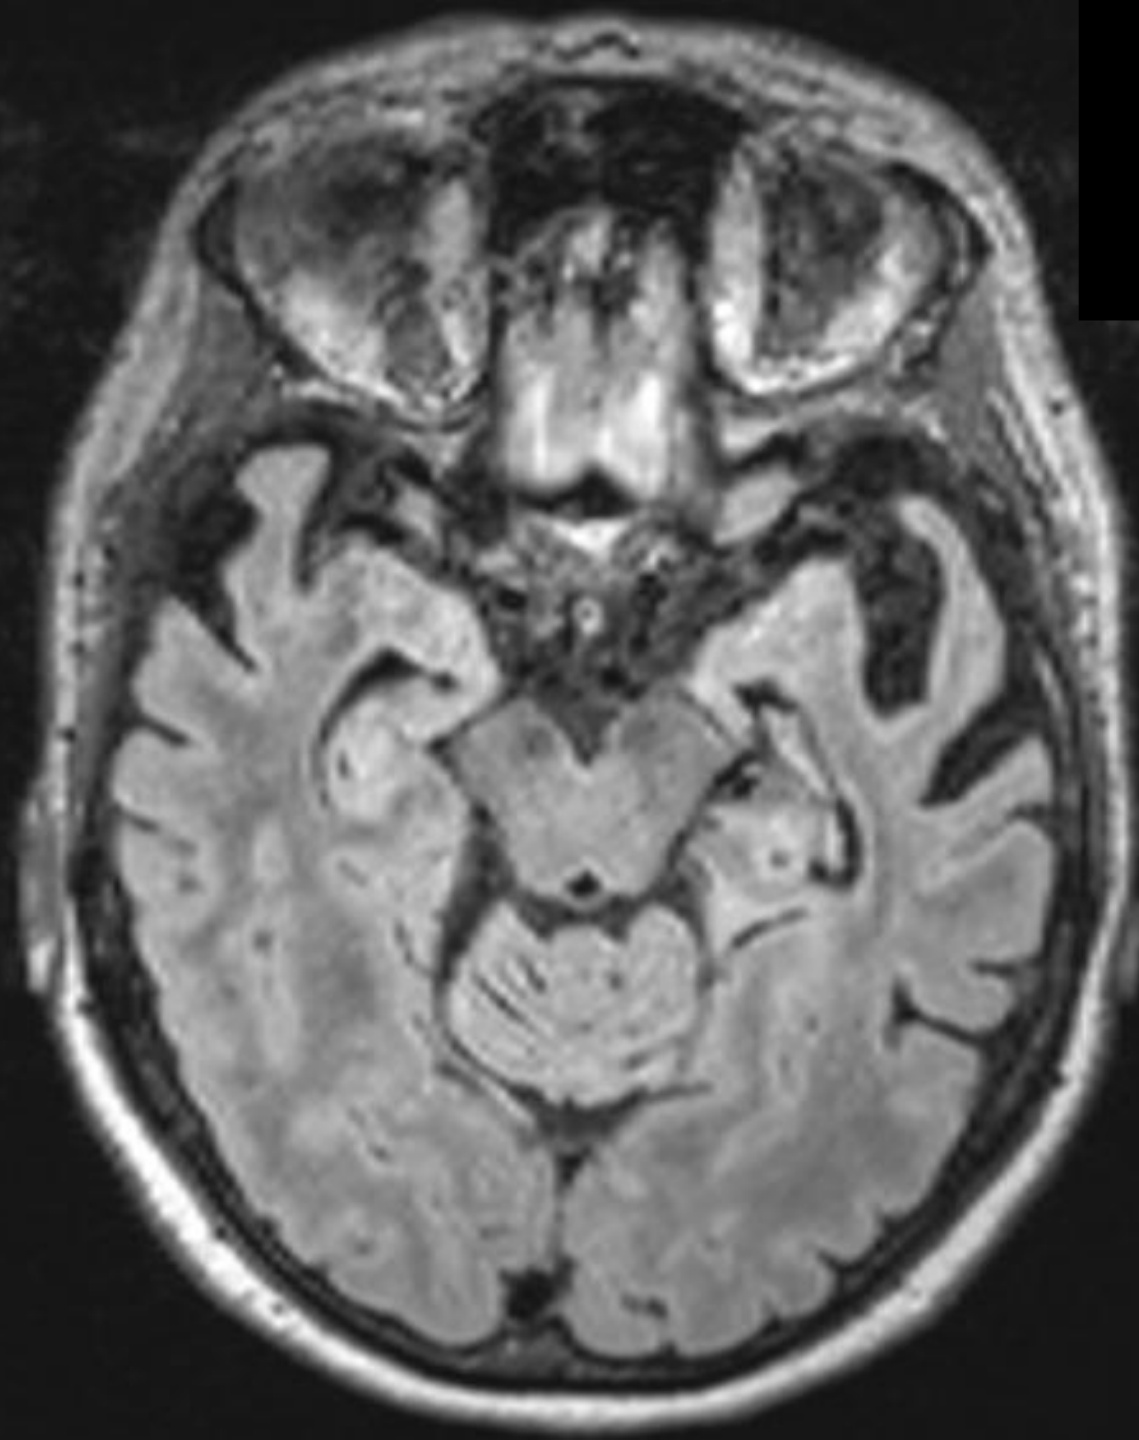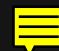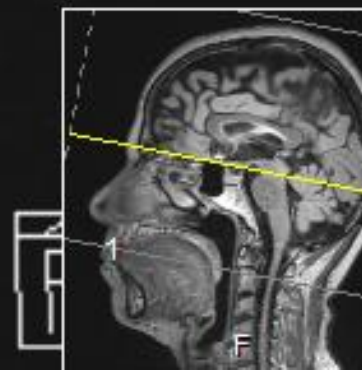

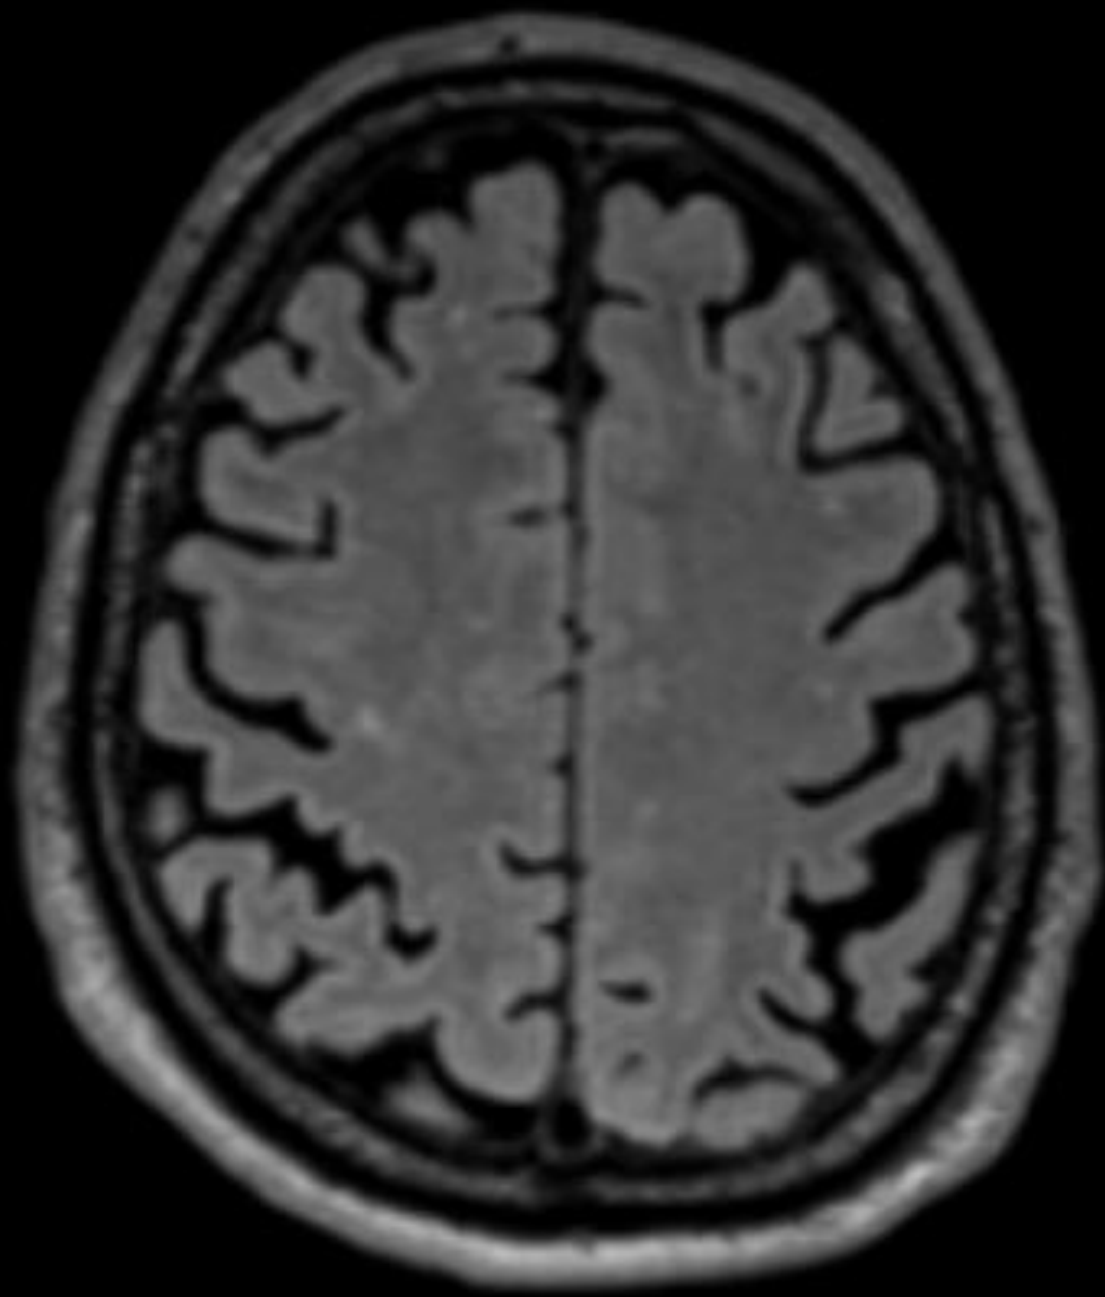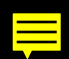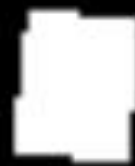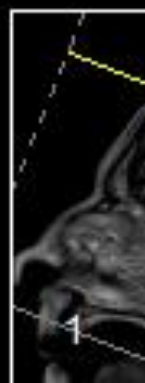

Supplement: 13244_2016_521_MOESM5_ESM.pdf [file 13244_2016_521_MOESM5_ESM.pdf]
