# Supplementary material for: Imaging biomarkers of dementia: recommended visual rating scales with teaching cases
Source: PubMed Central journal article supplement (PMC5265189; doi:10.1007/s13244-016-0521-6), 2016-12-21

1

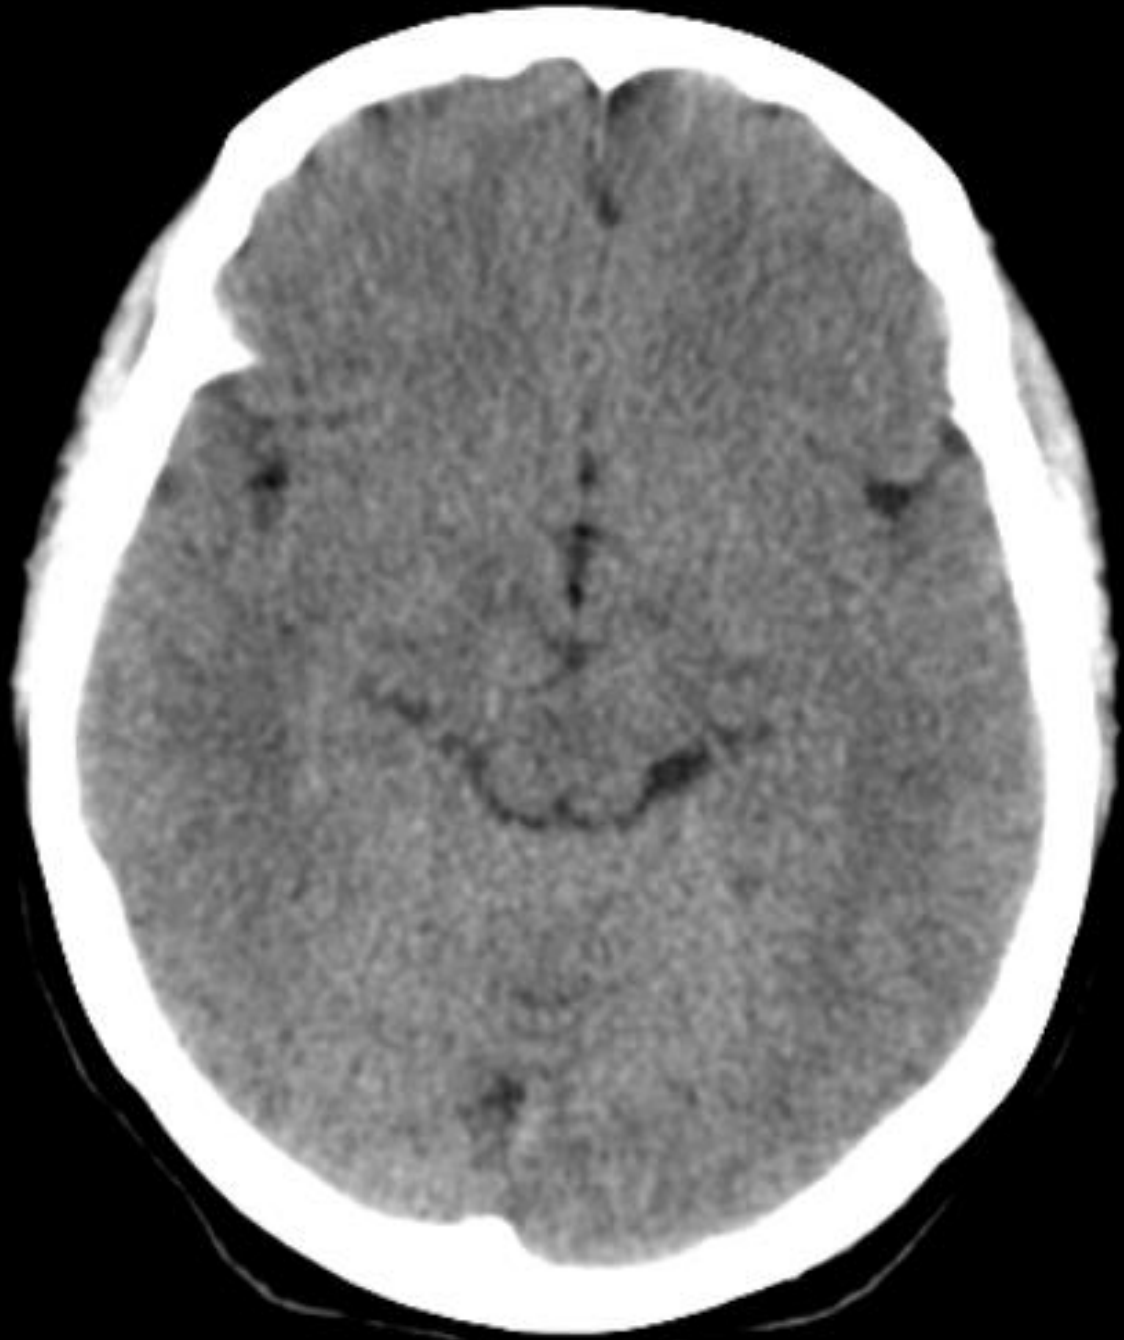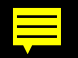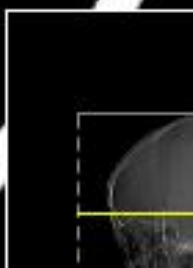

2

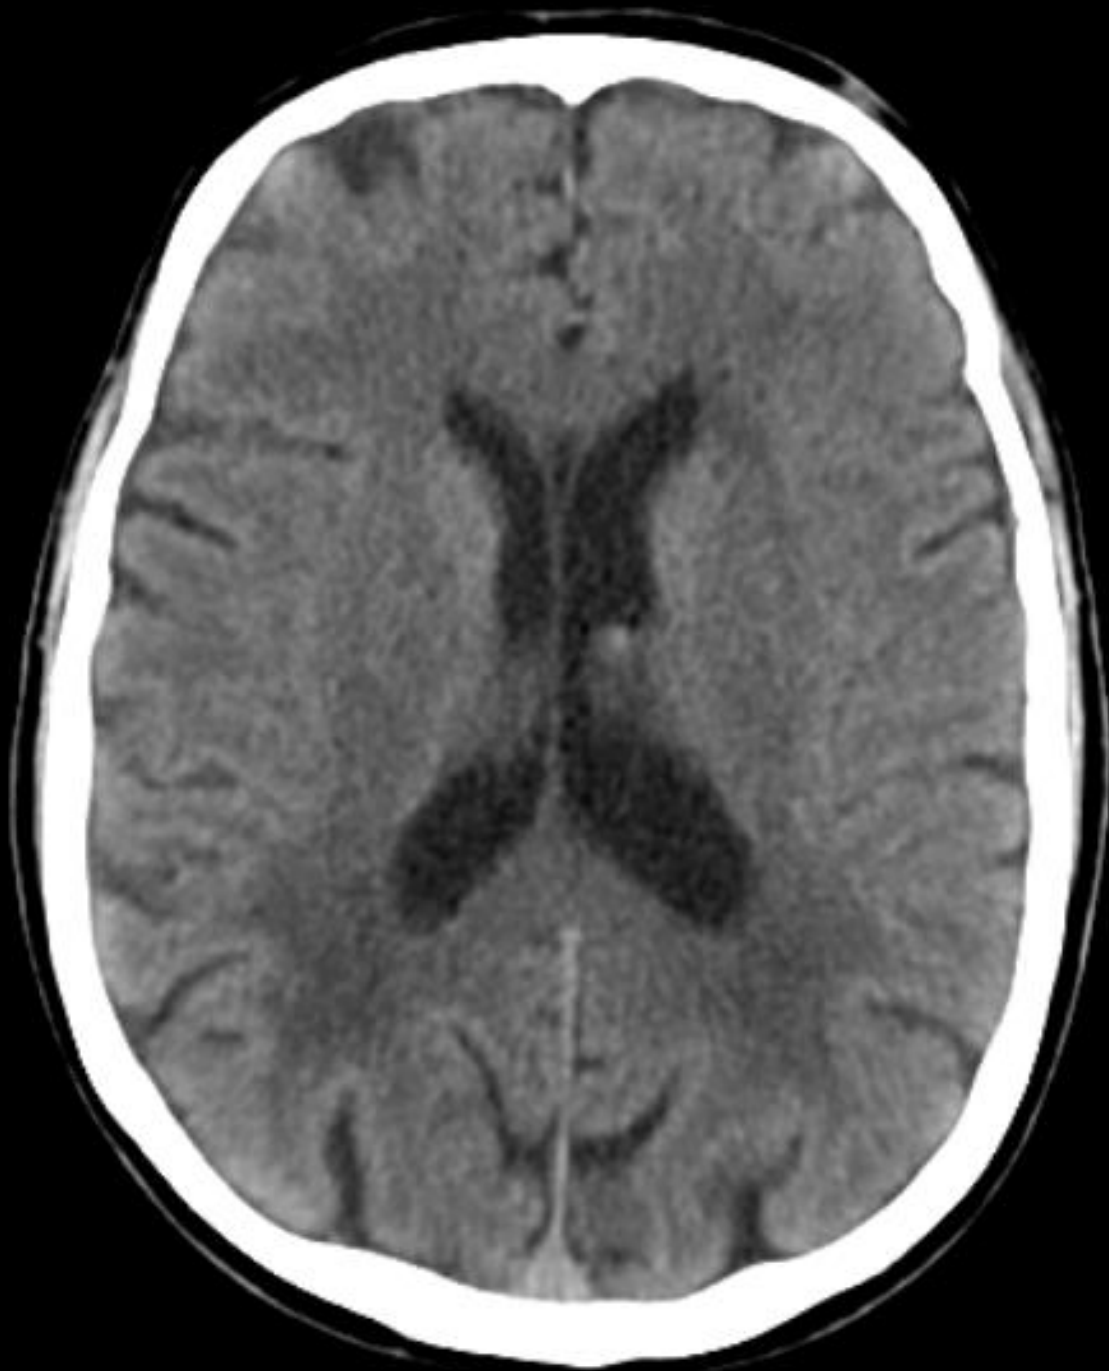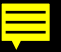

1/10

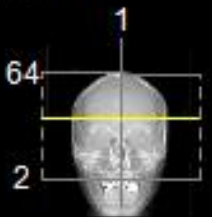

F

3

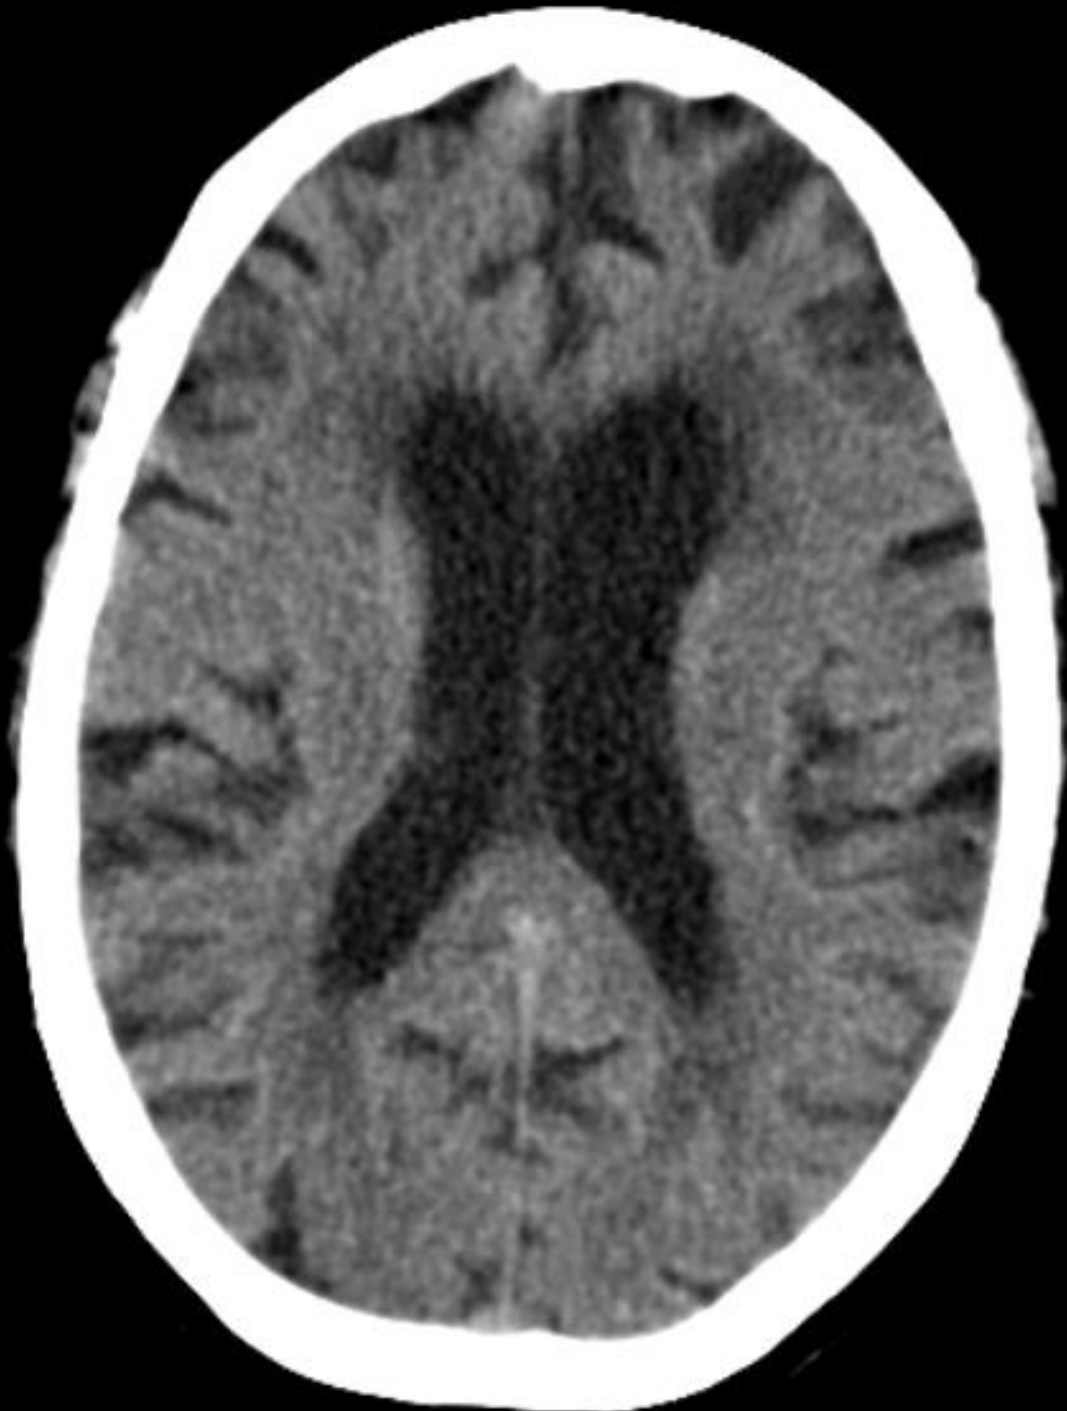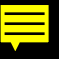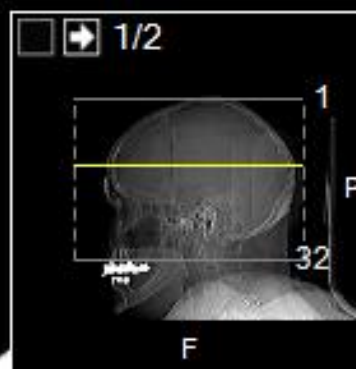

4

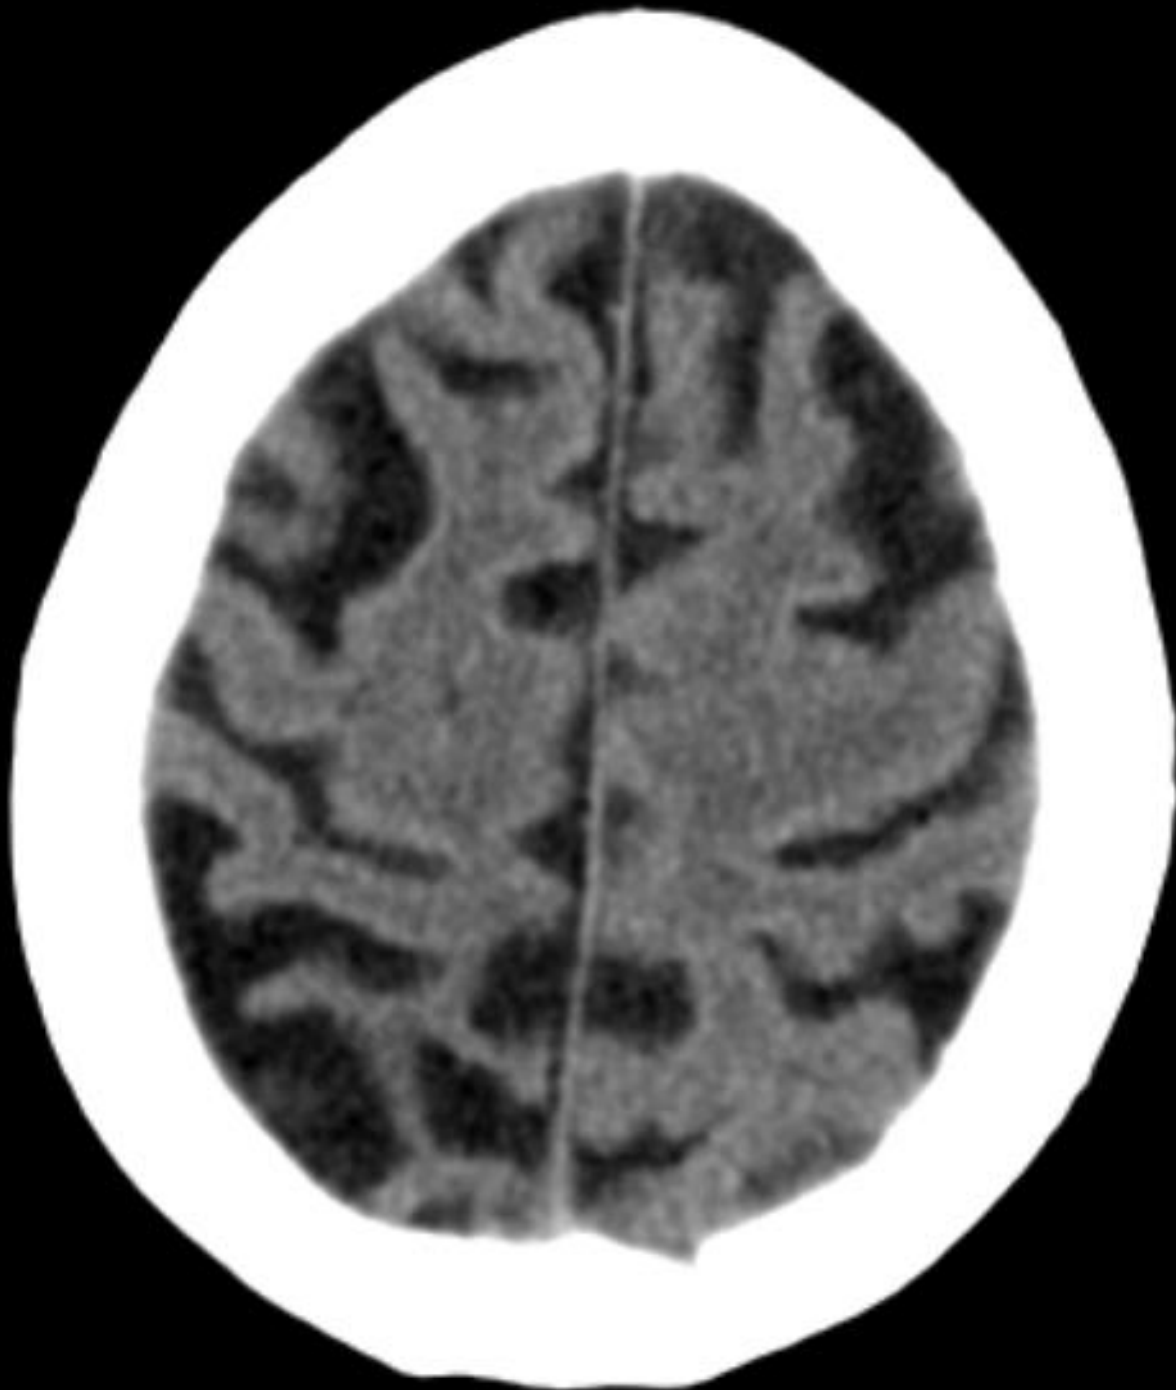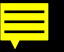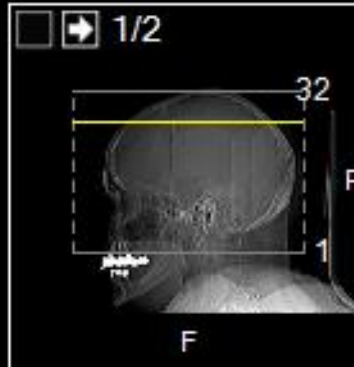

5

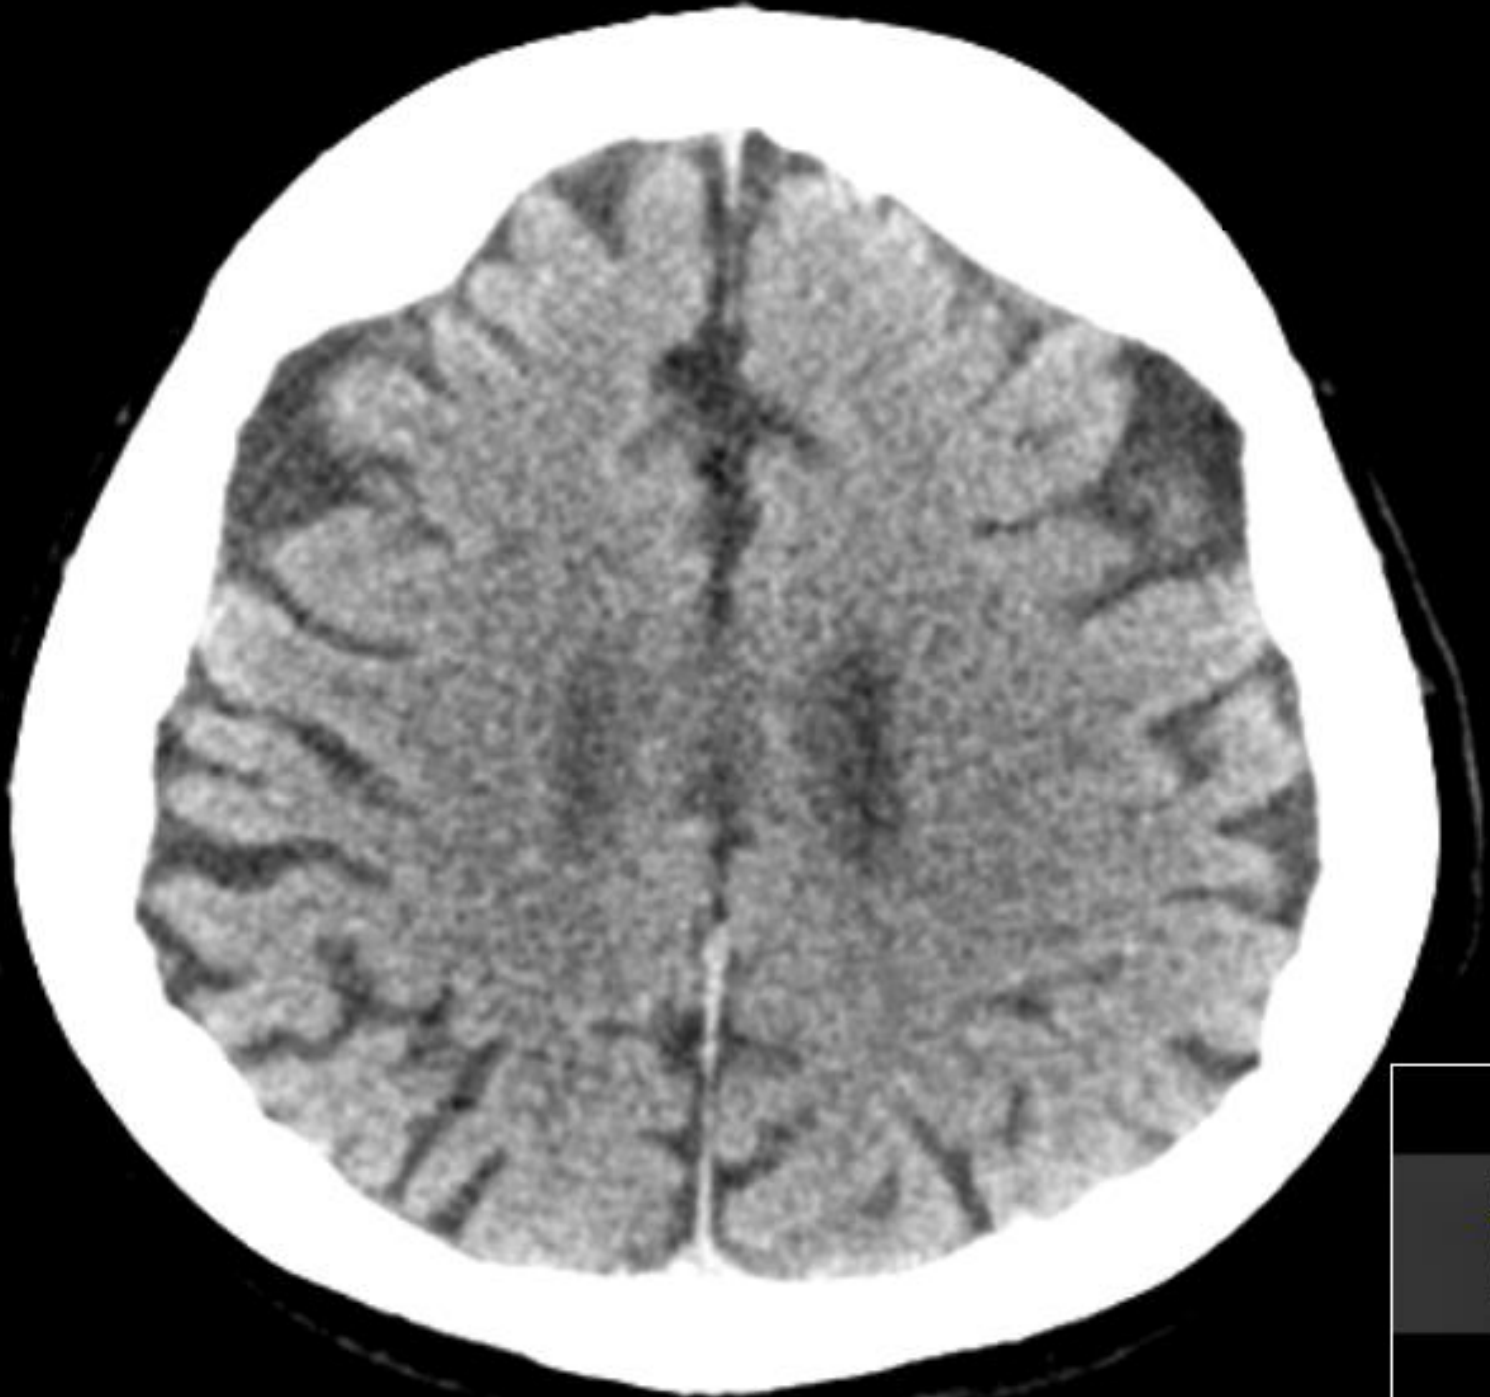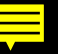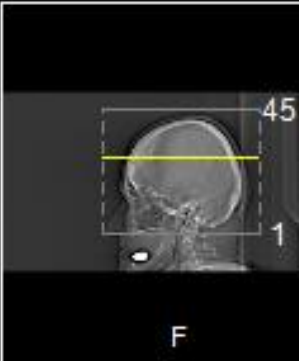

F

6

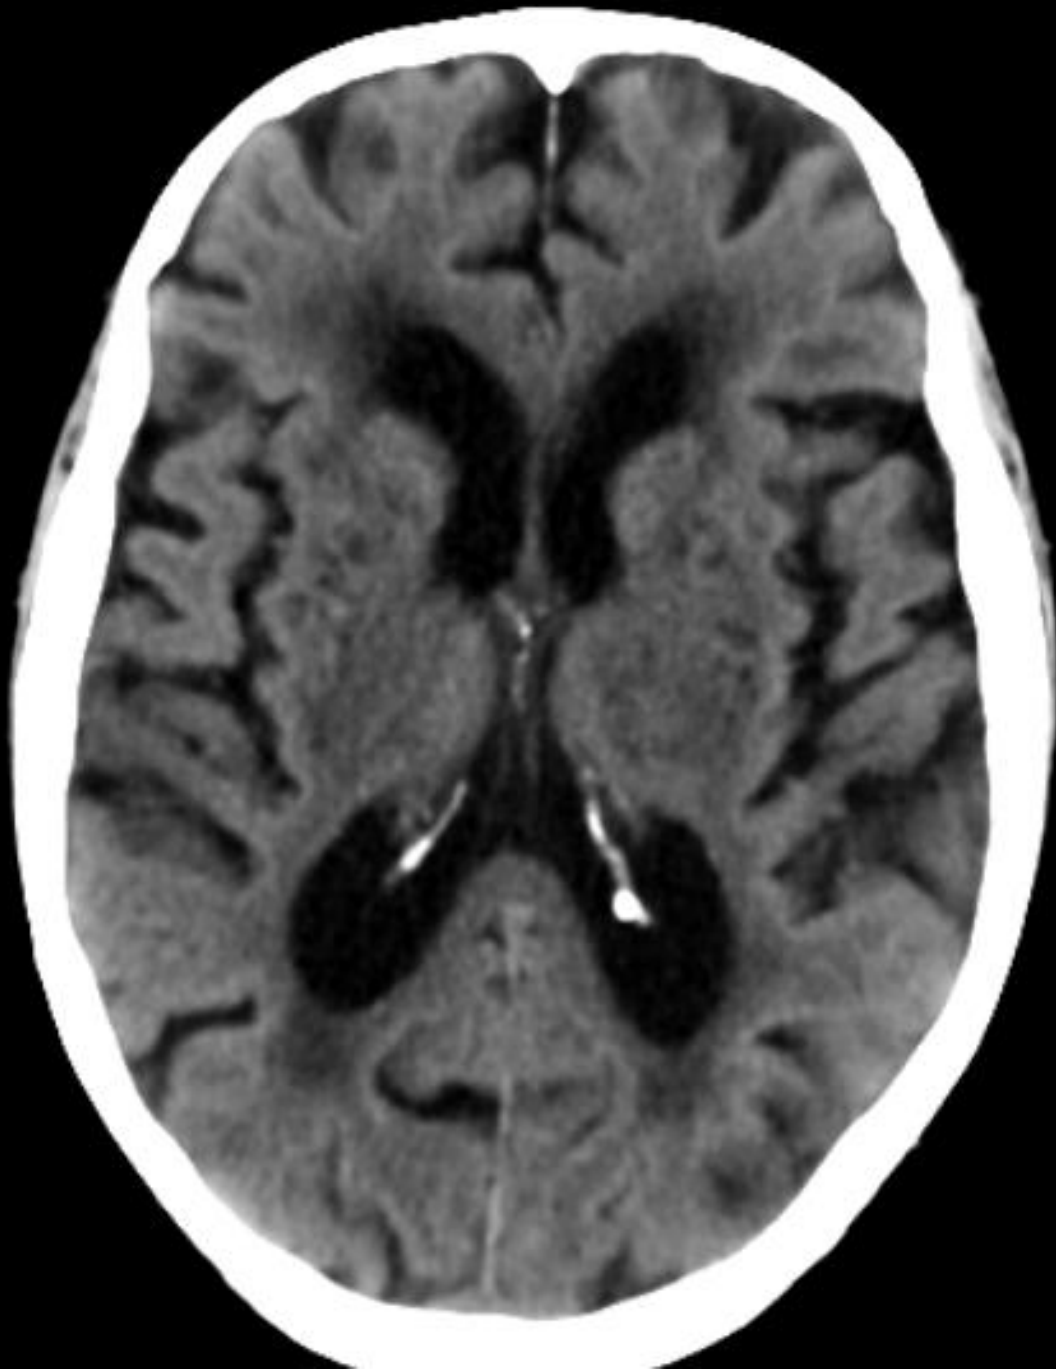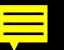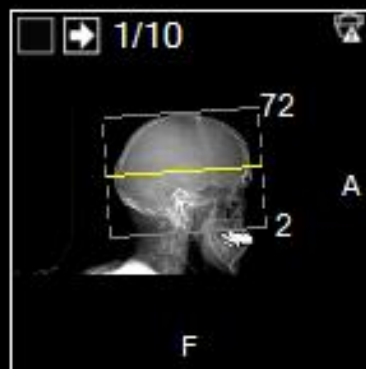

7

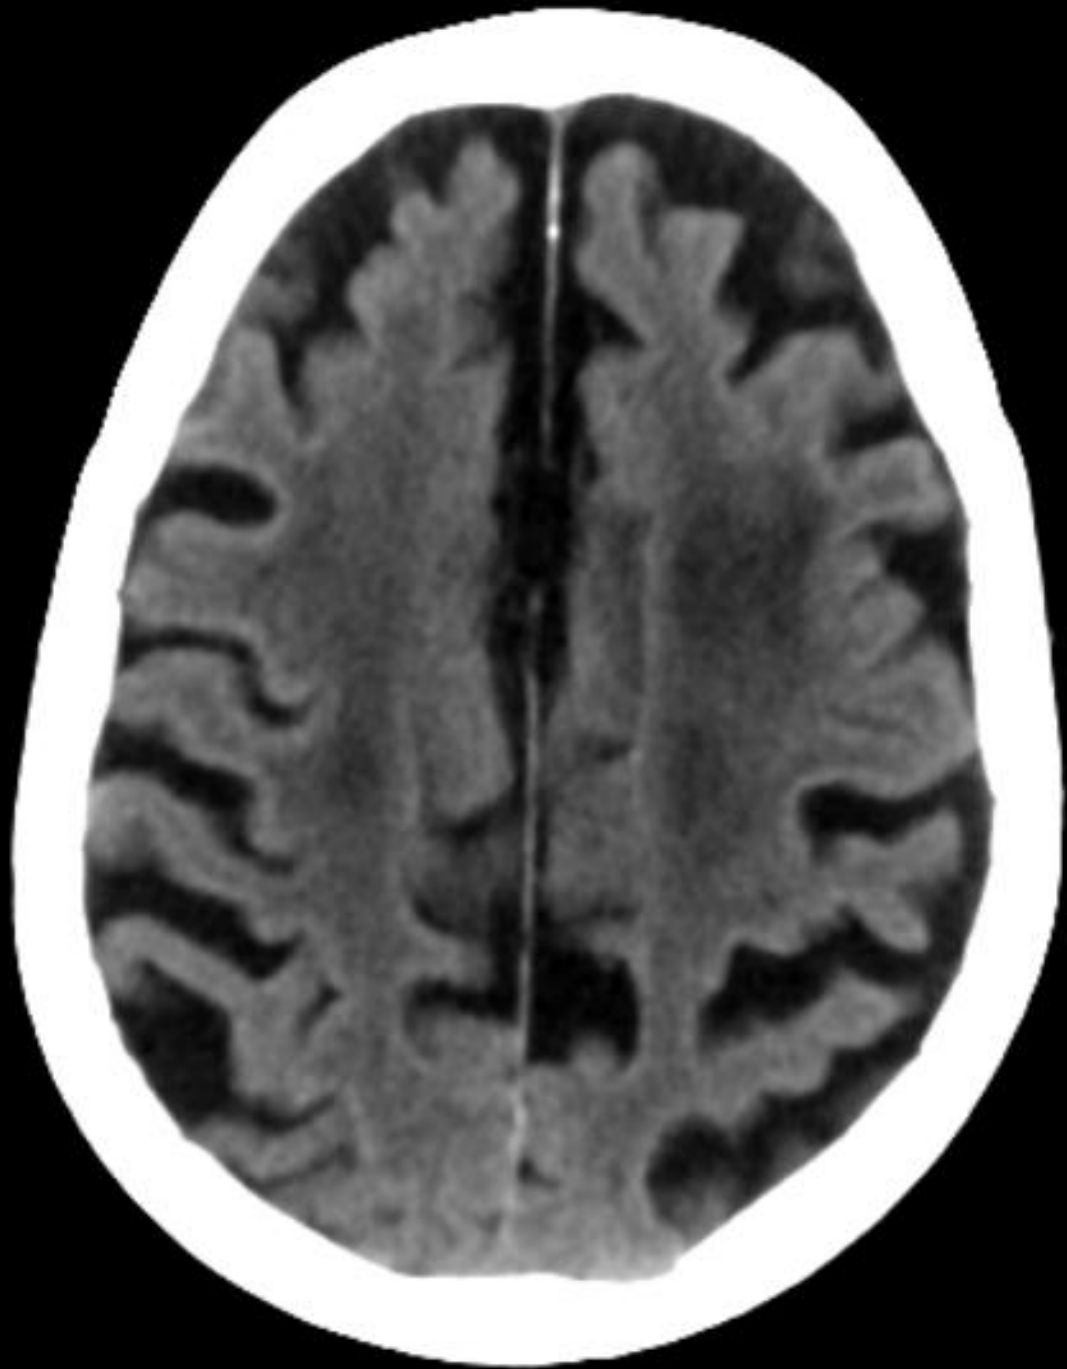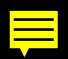

1/10

A small thumbnail image showing a sagittal view of a brain scan. A yellow horizontal line is drawn across the brain, with the number '72' at its right end and the number '2' at its left end. The thumbnail is enclosed in a dashed box.

F

8

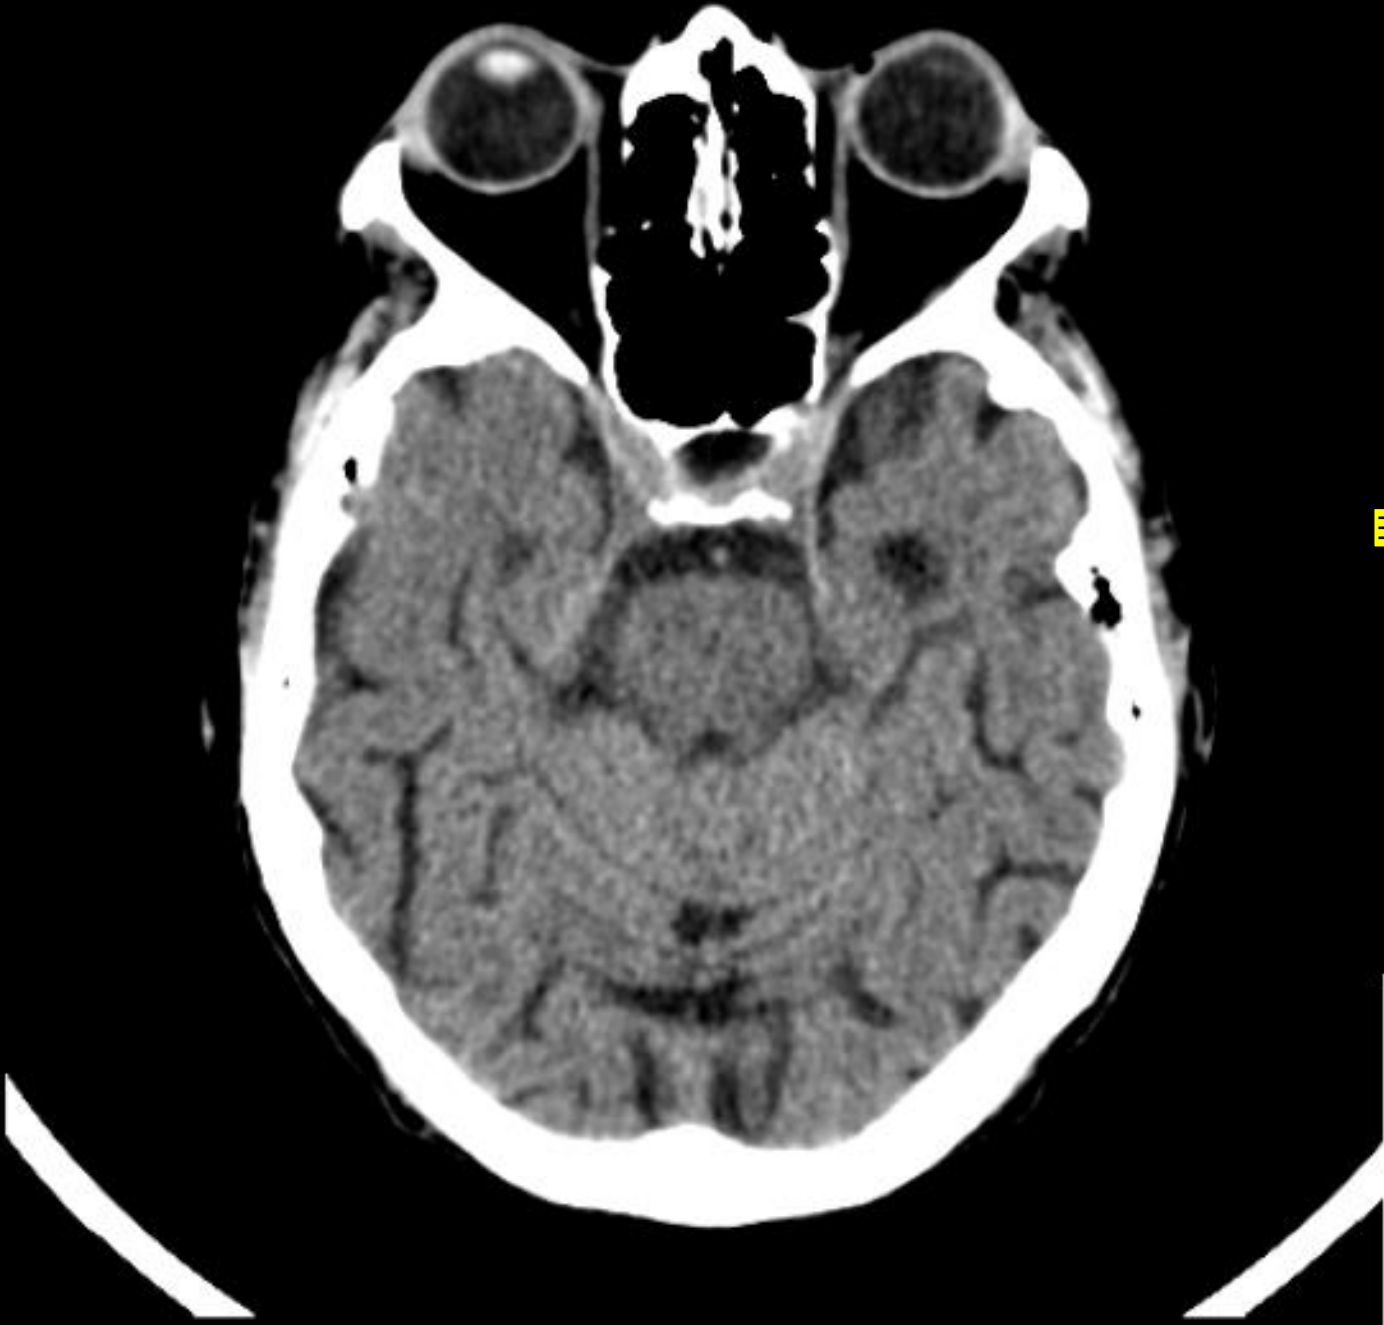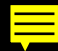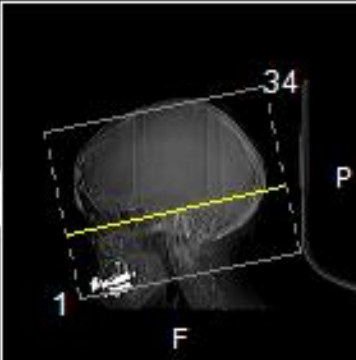



9

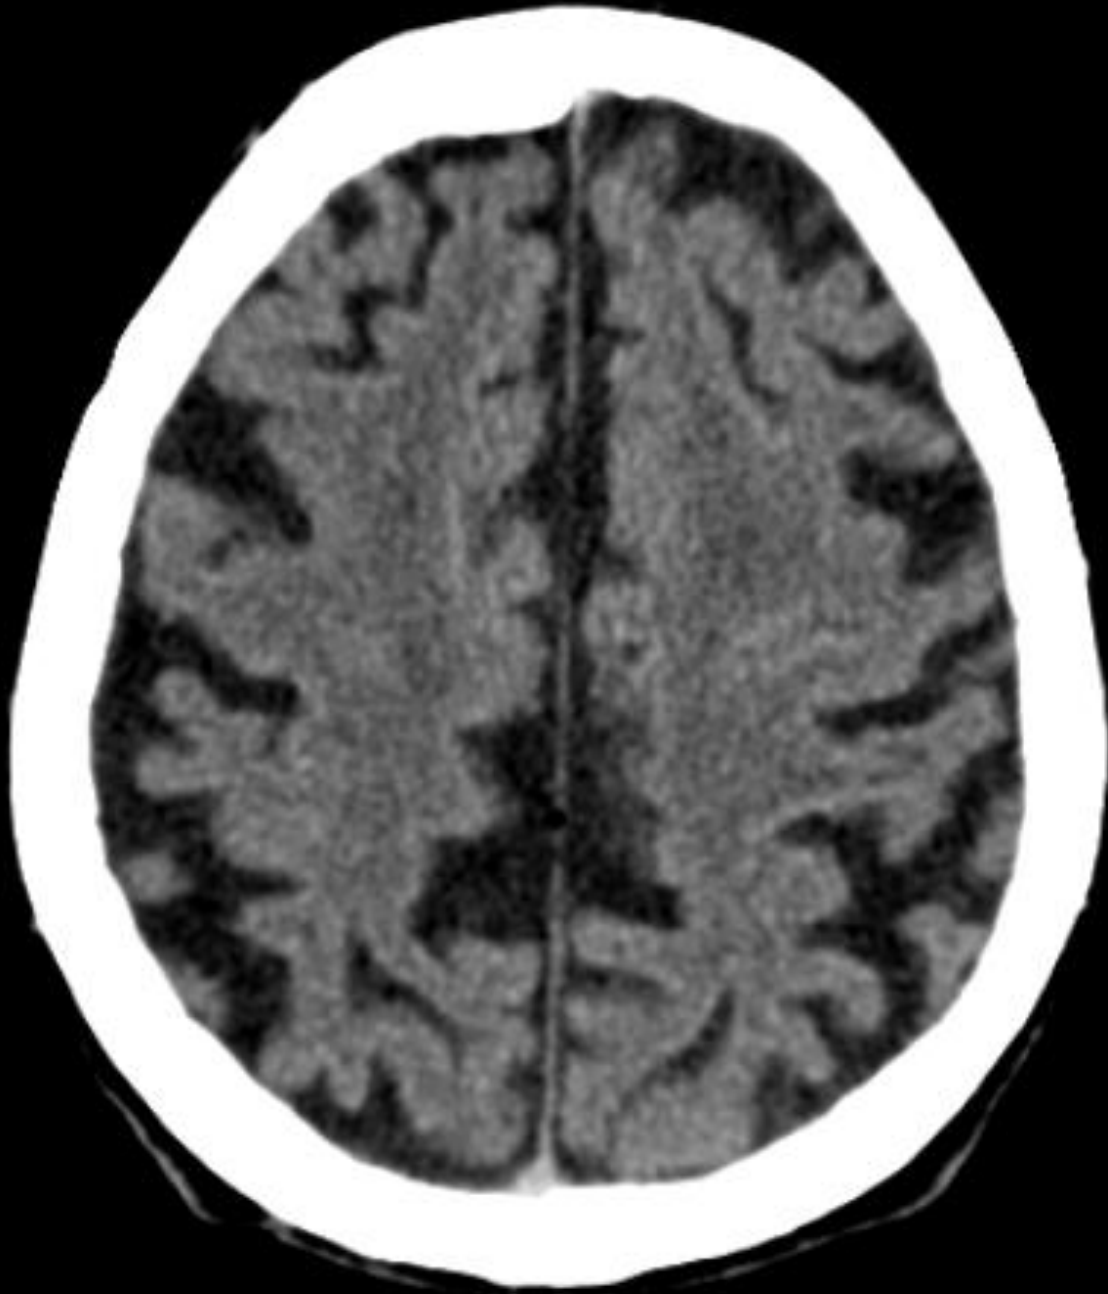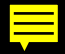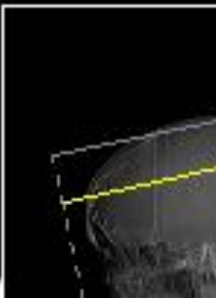

10

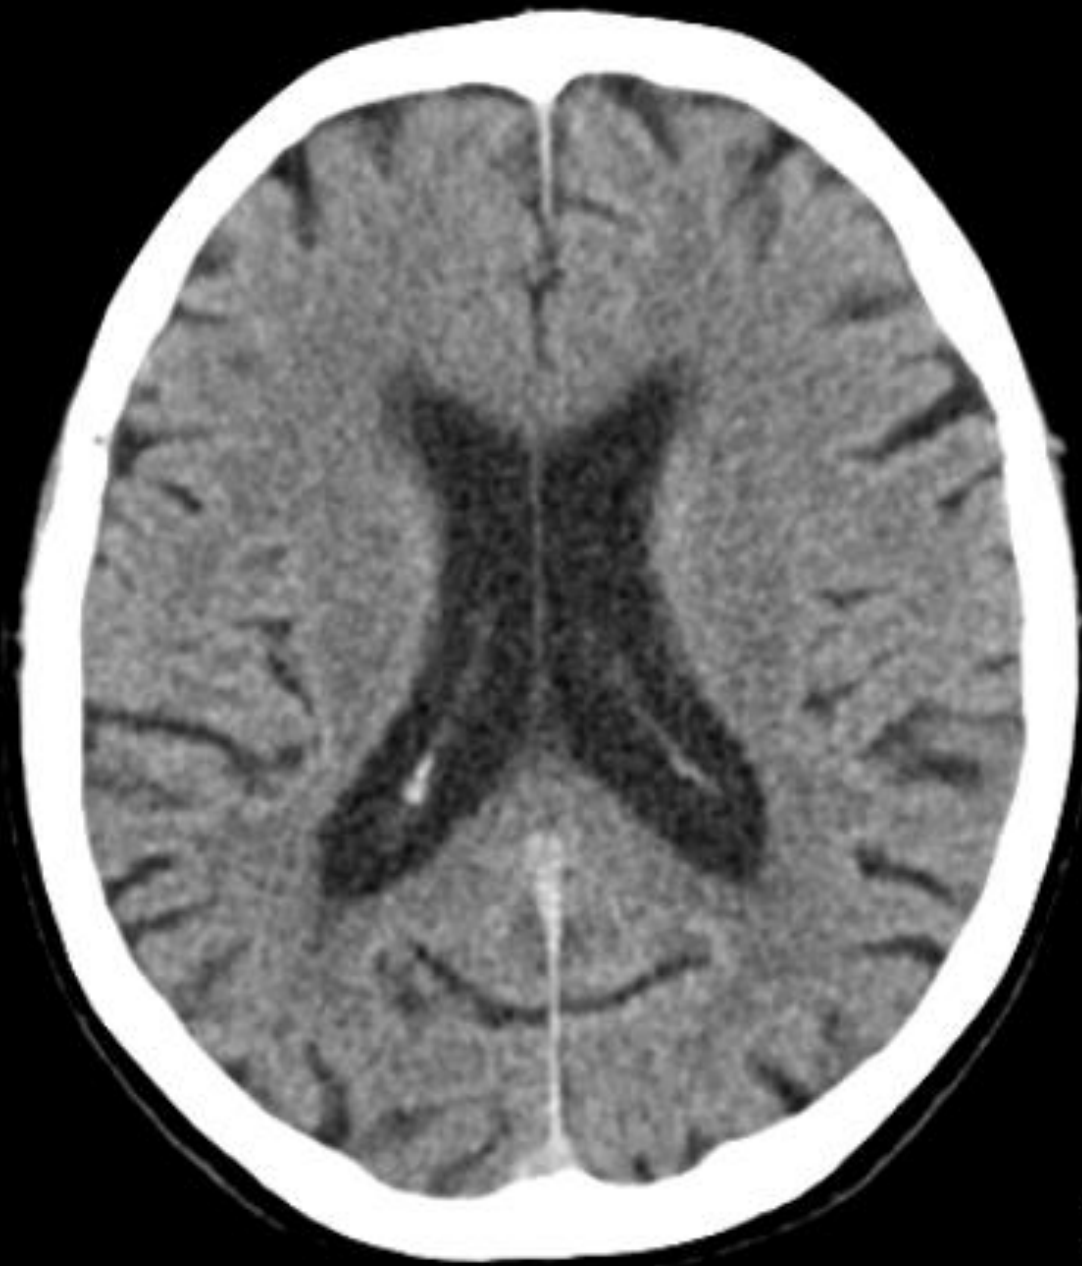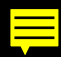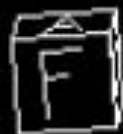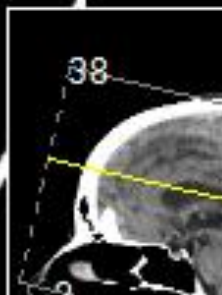

11

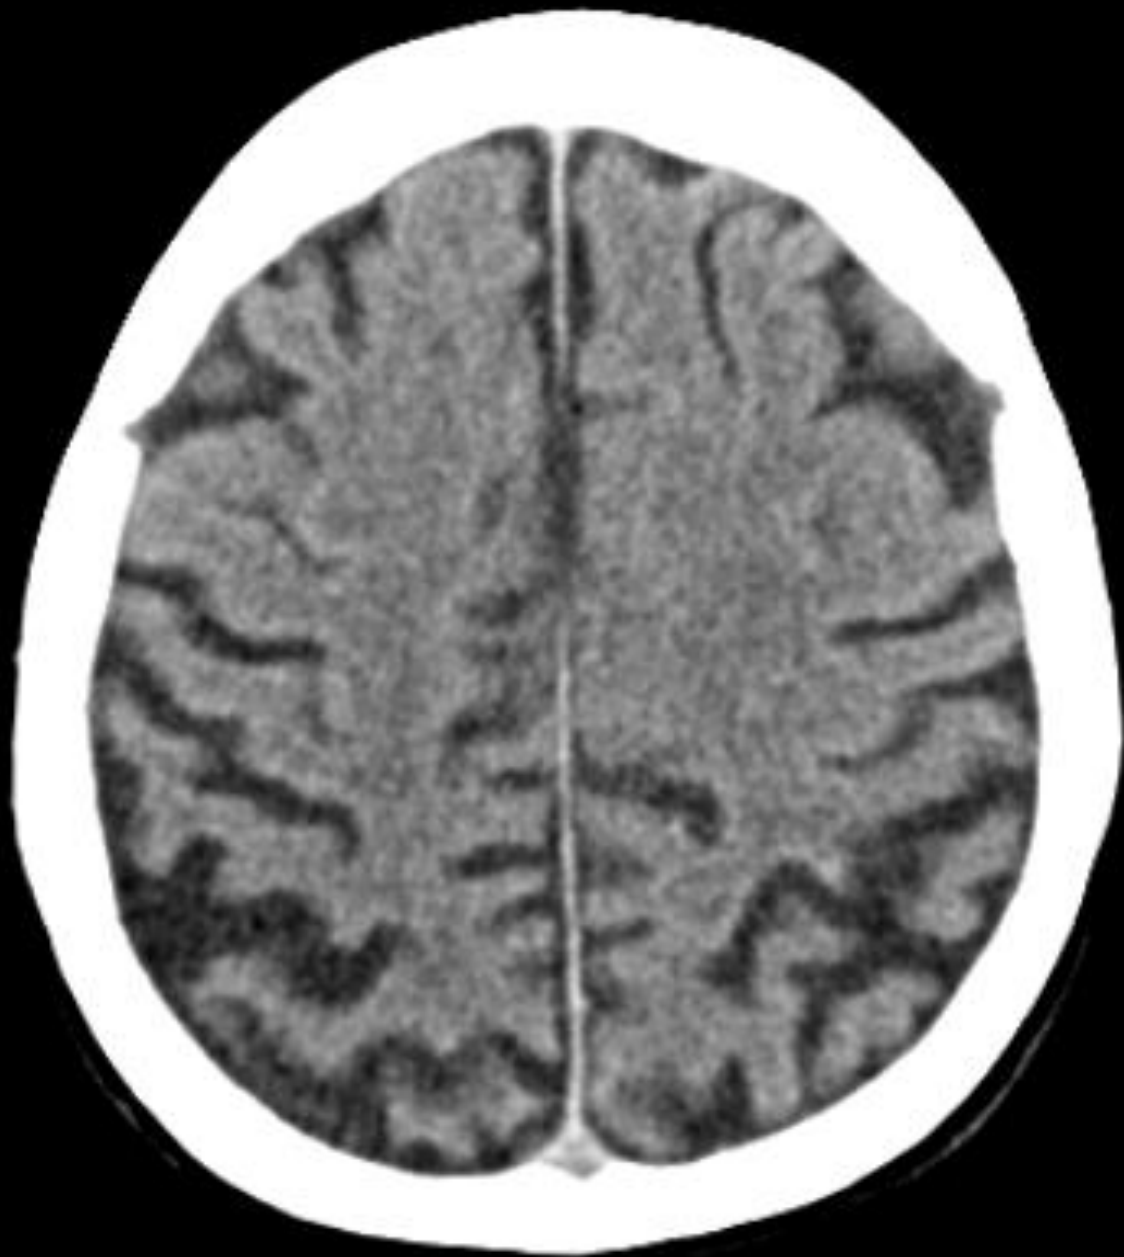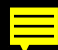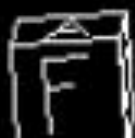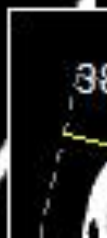

12

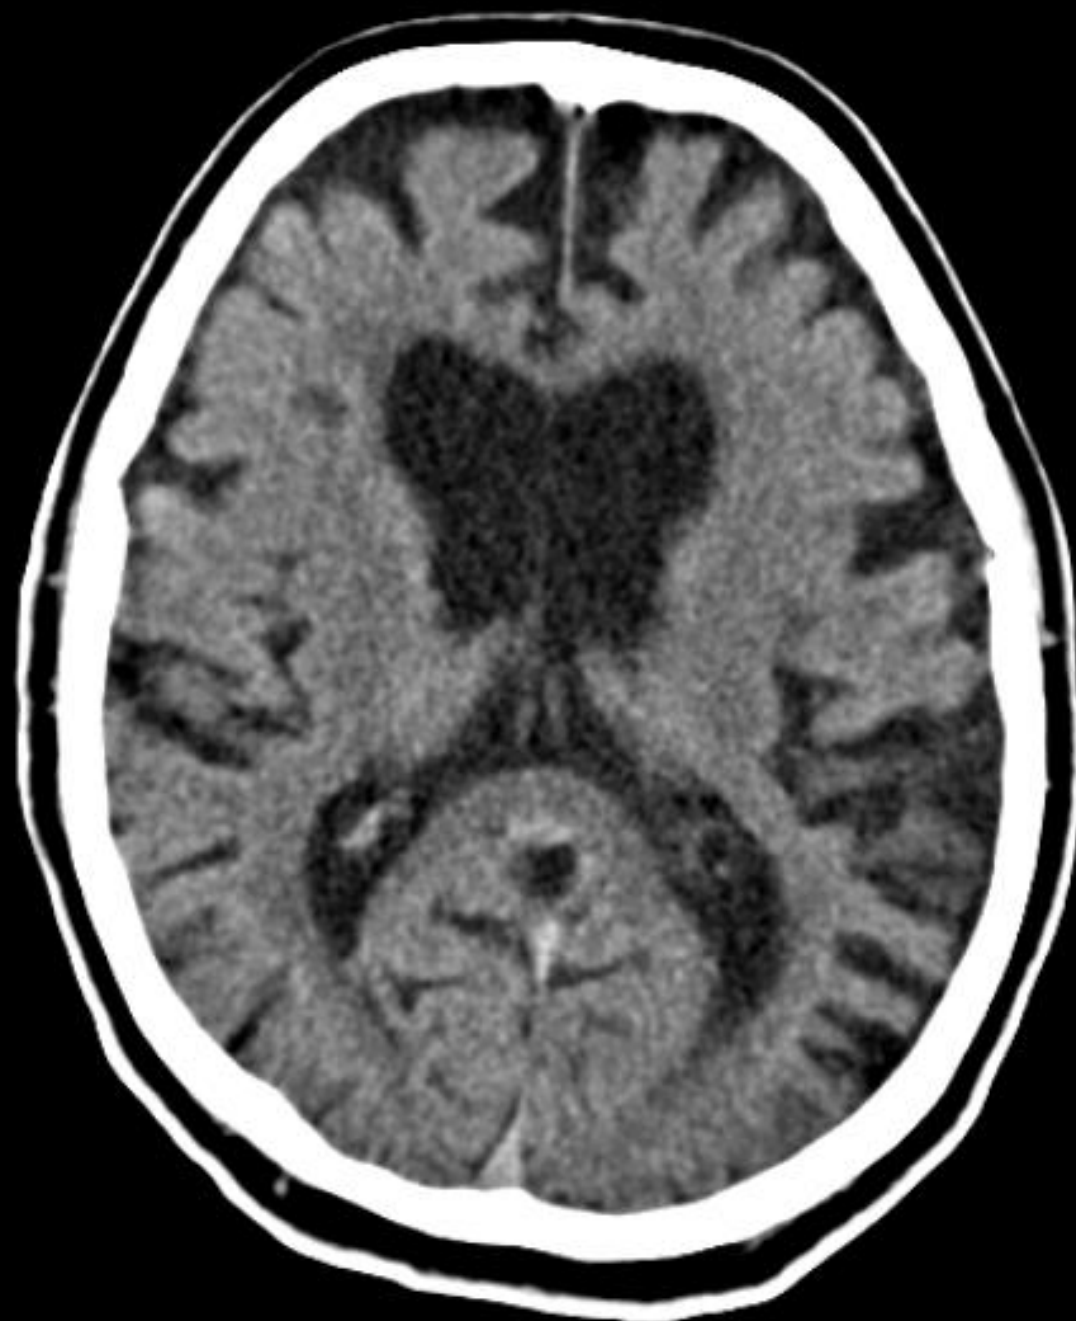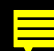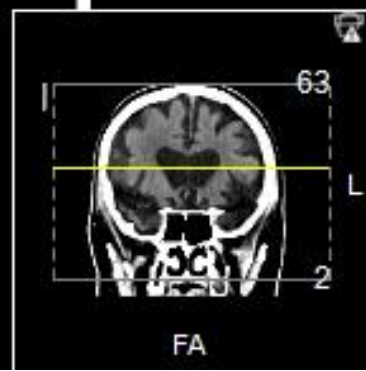

13

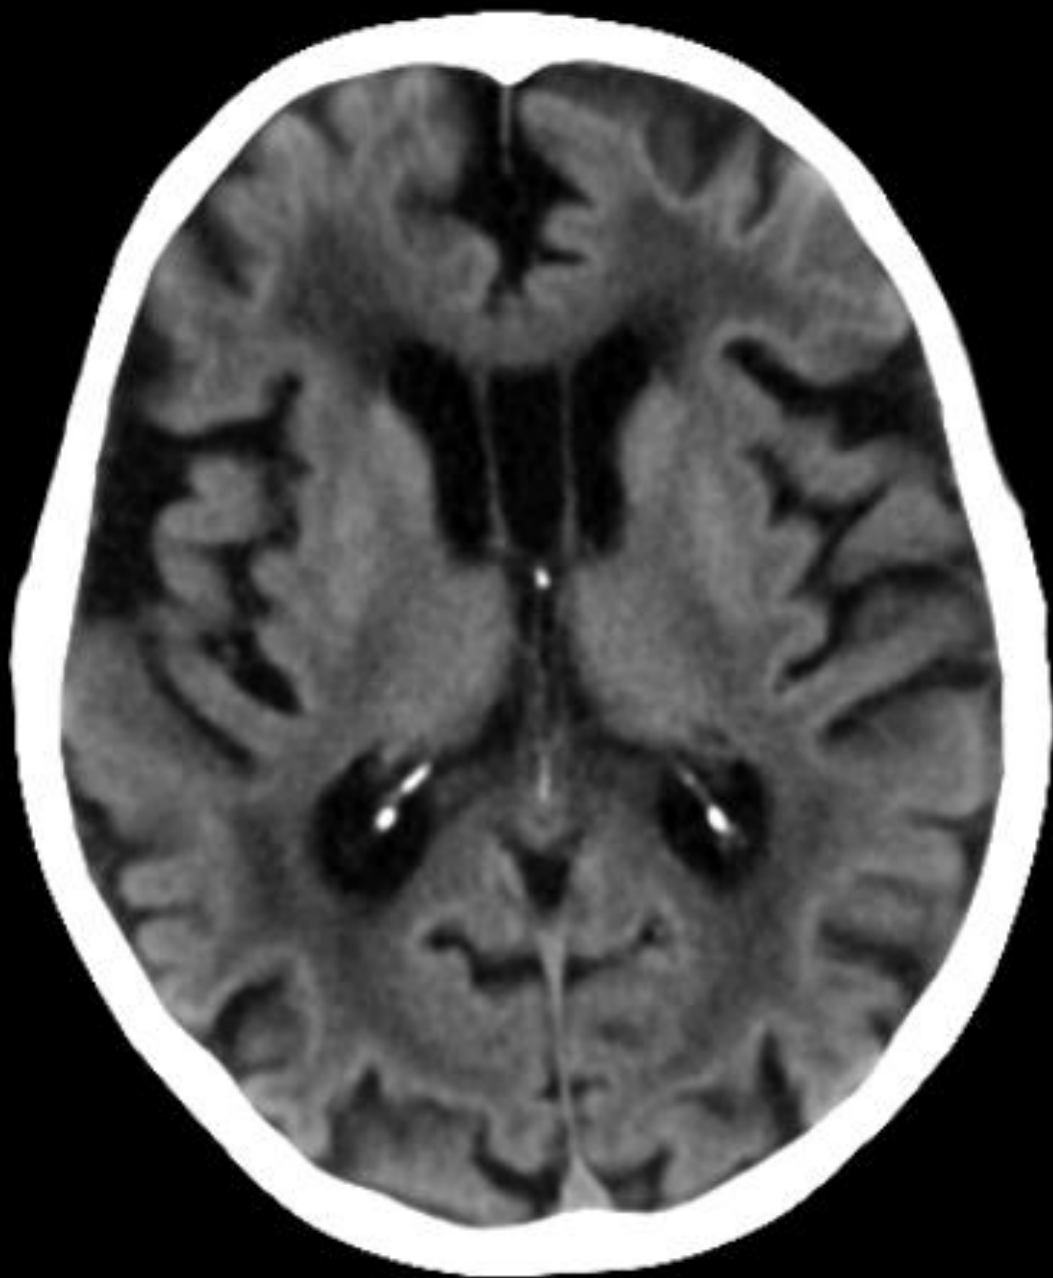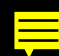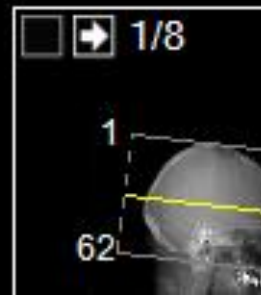

14

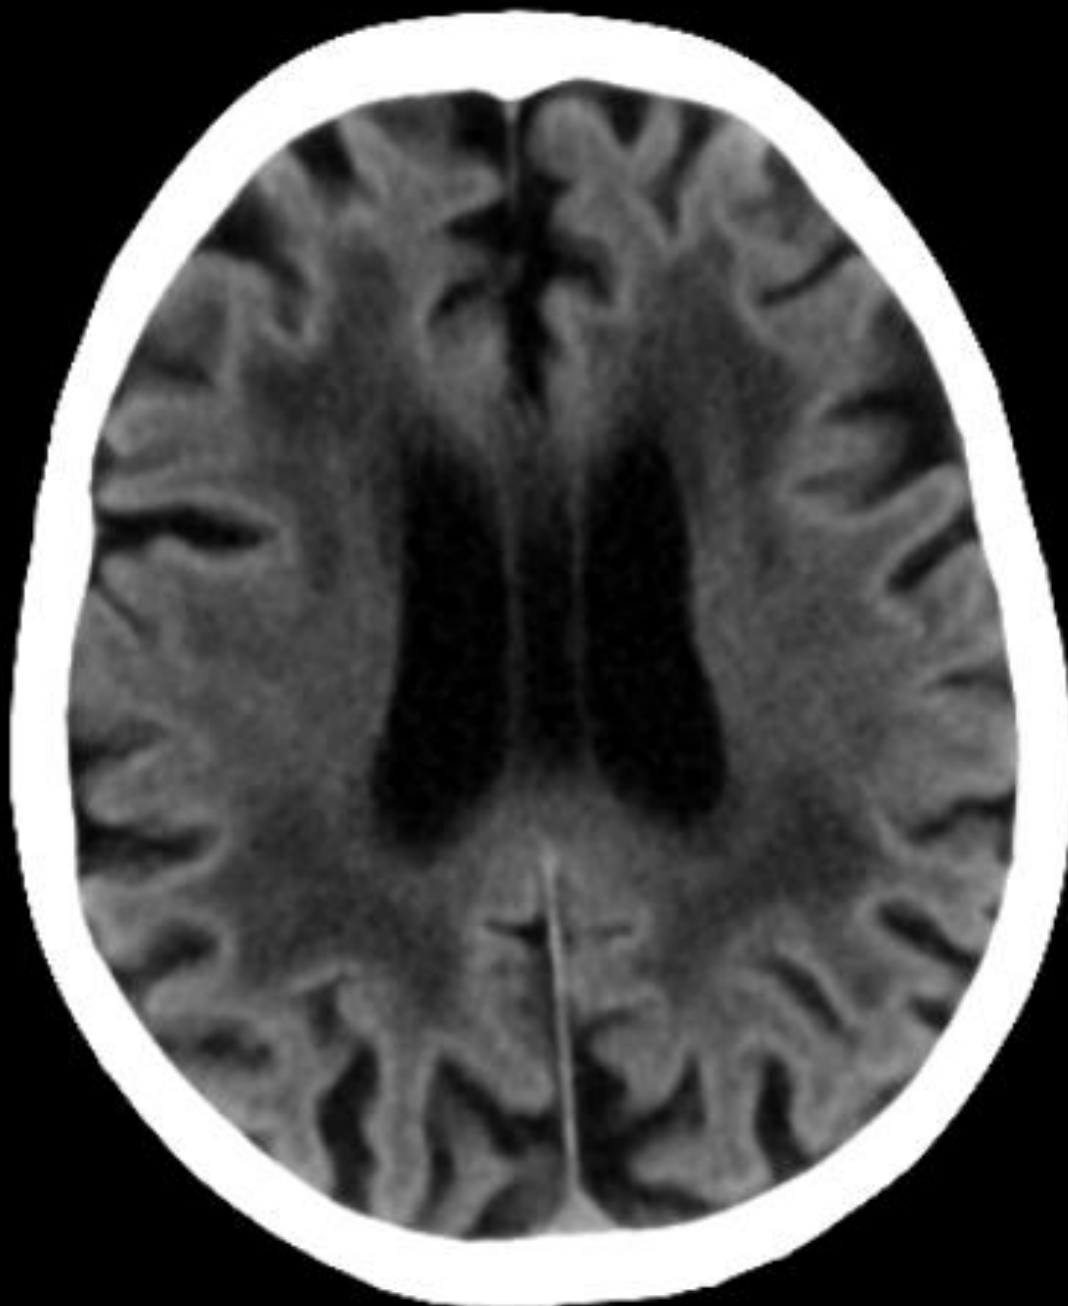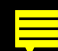

1/8

1

62

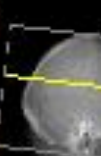

15

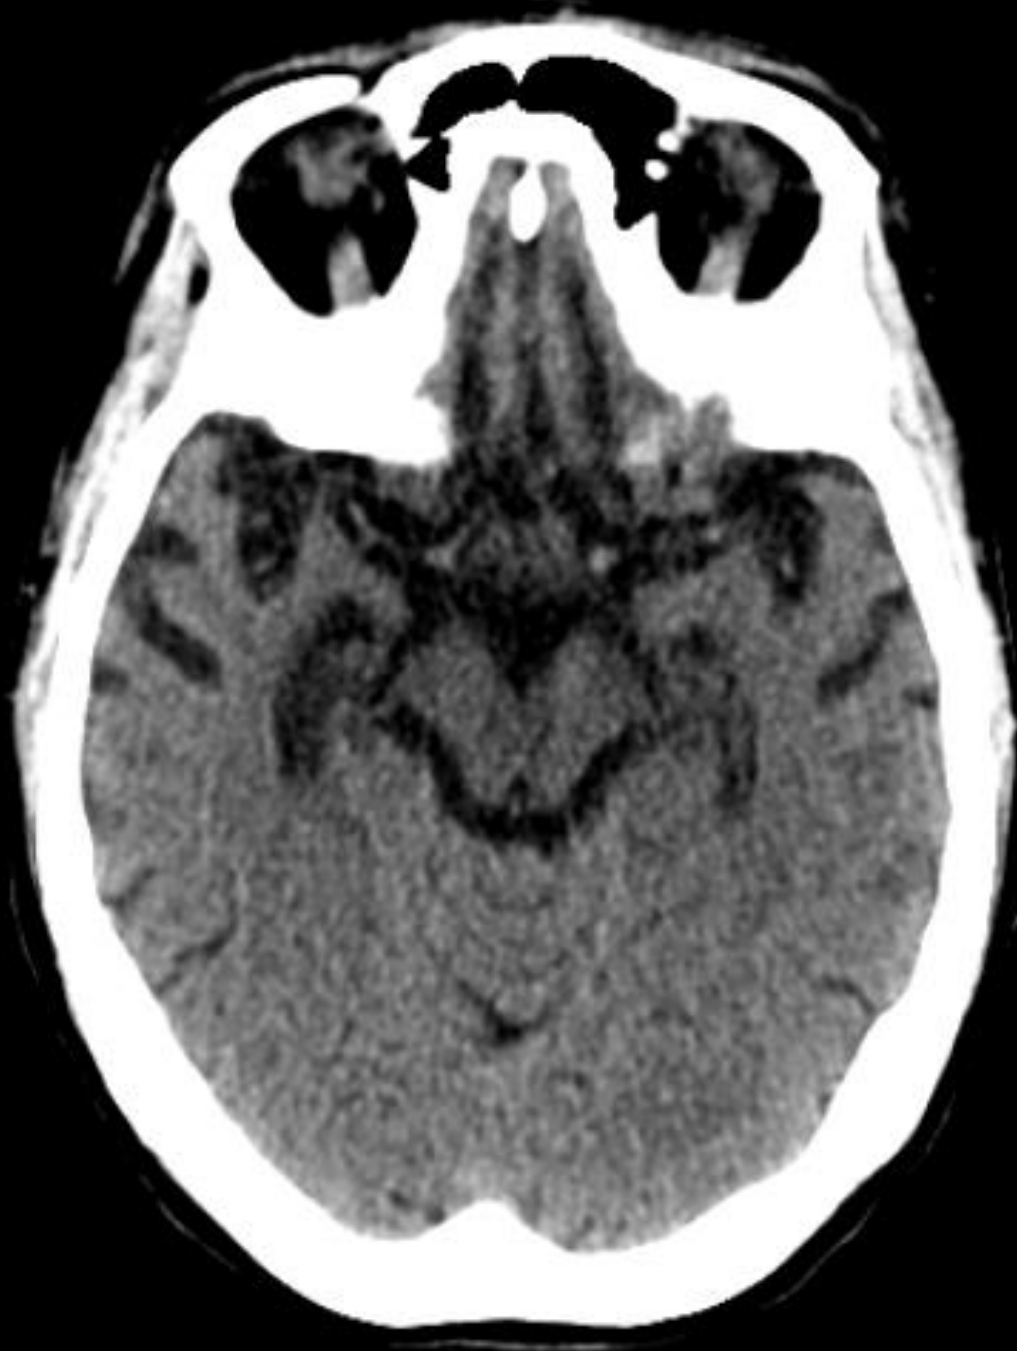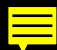

1/8

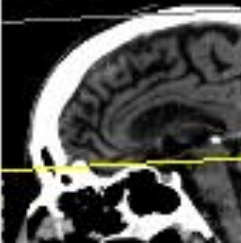

16

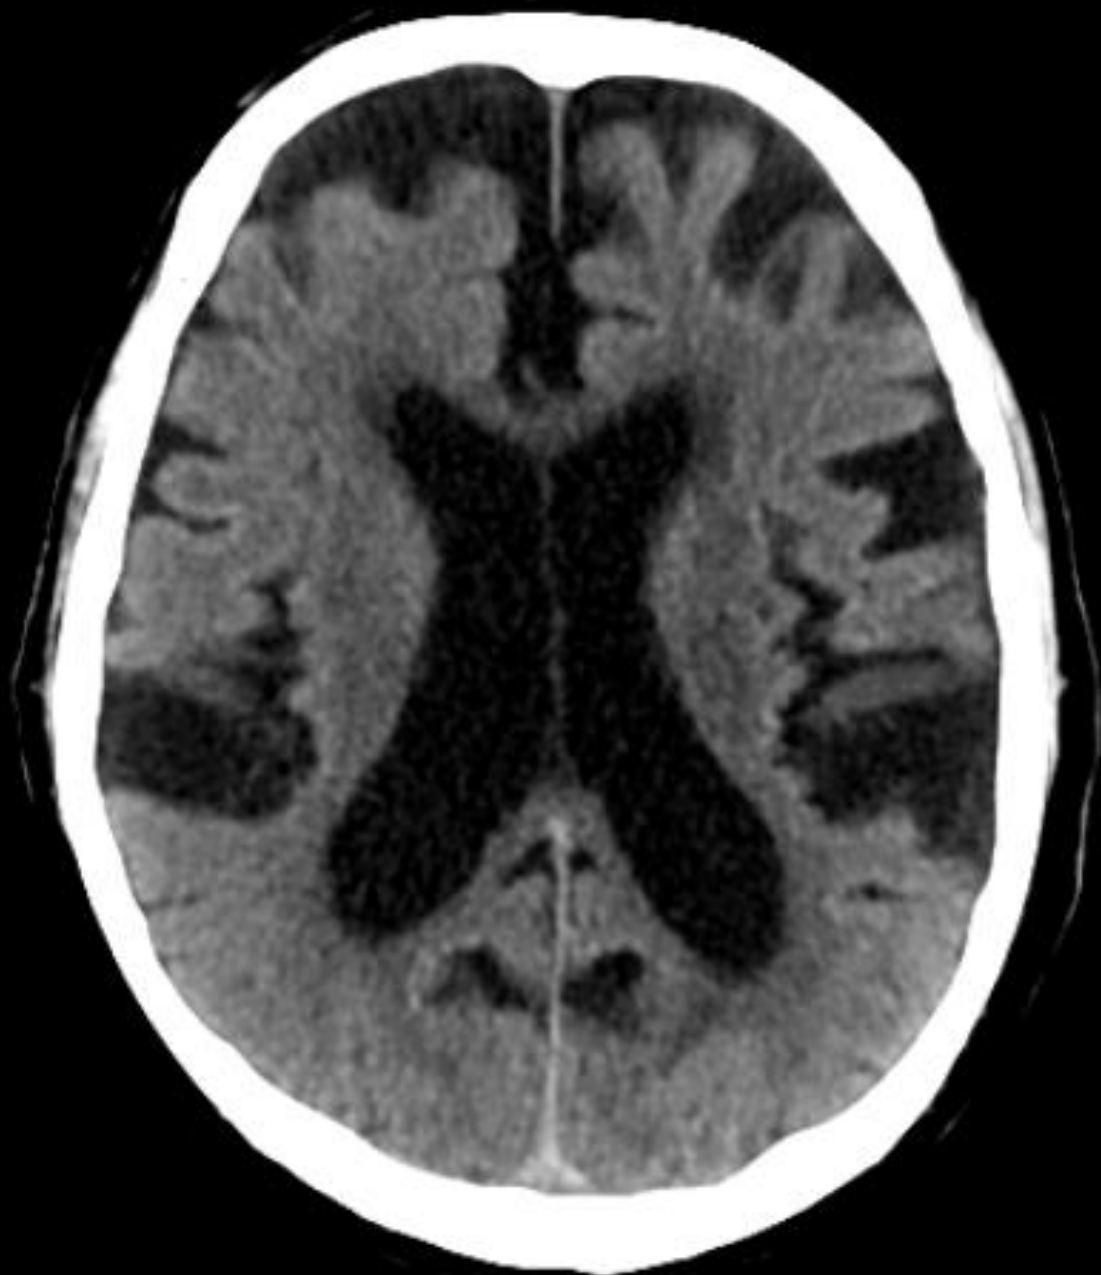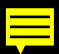

1/6

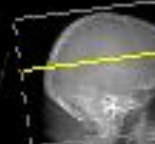



17

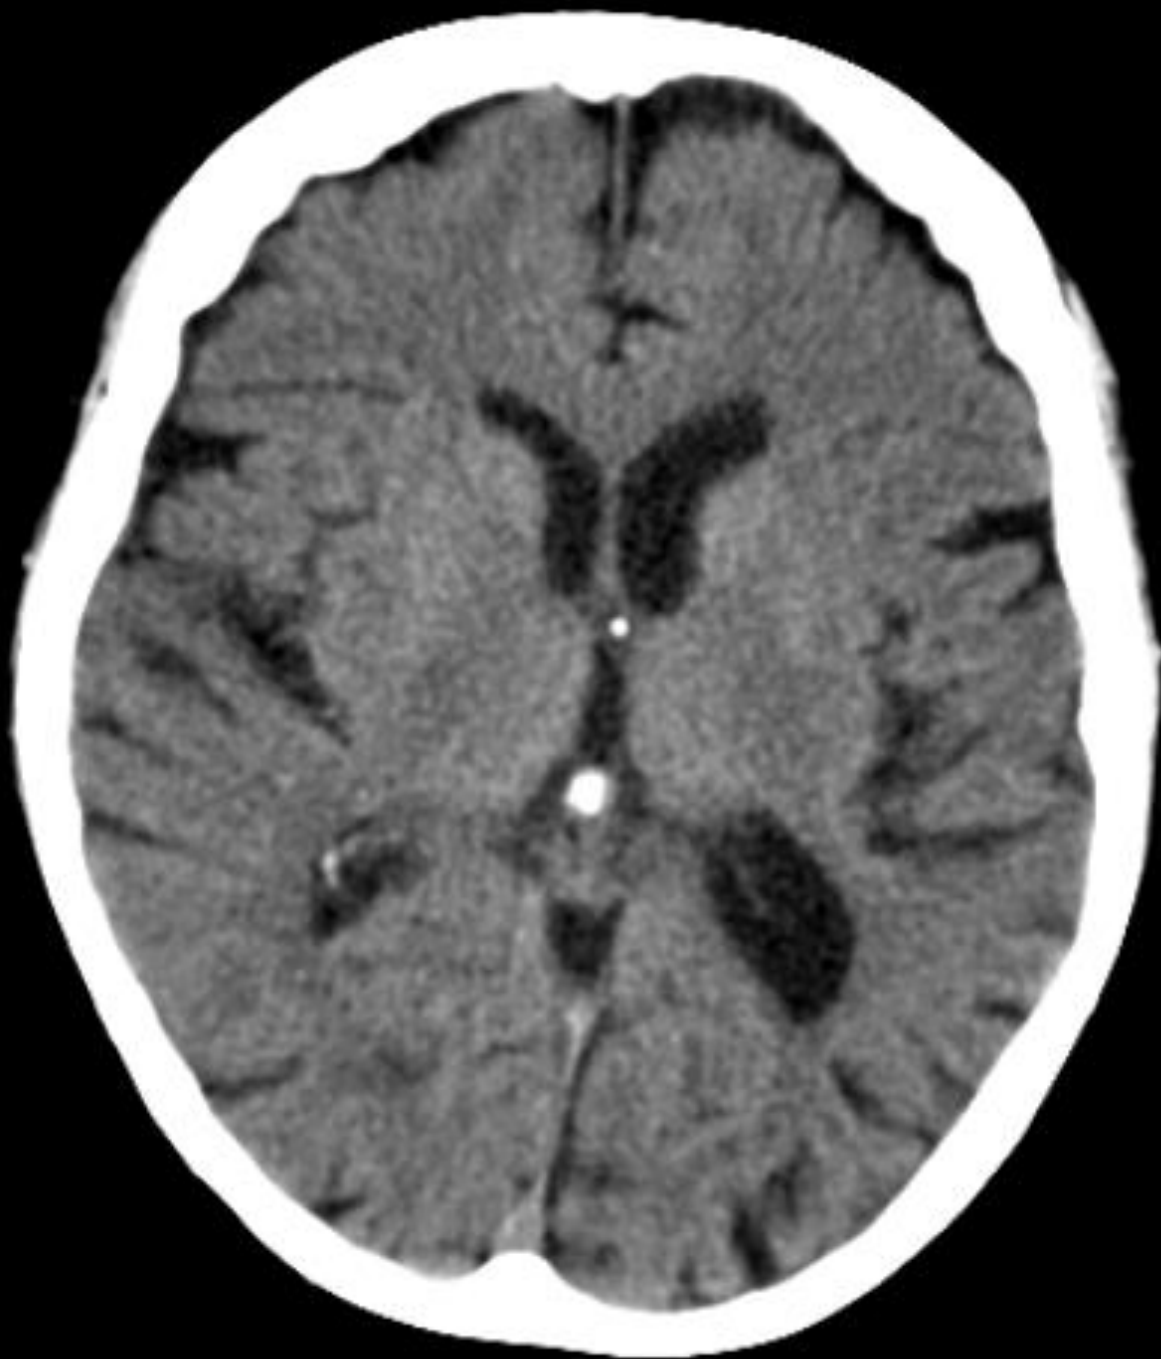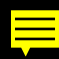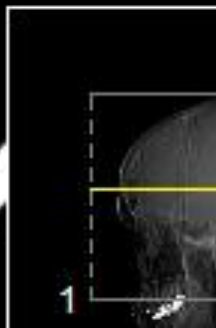

18

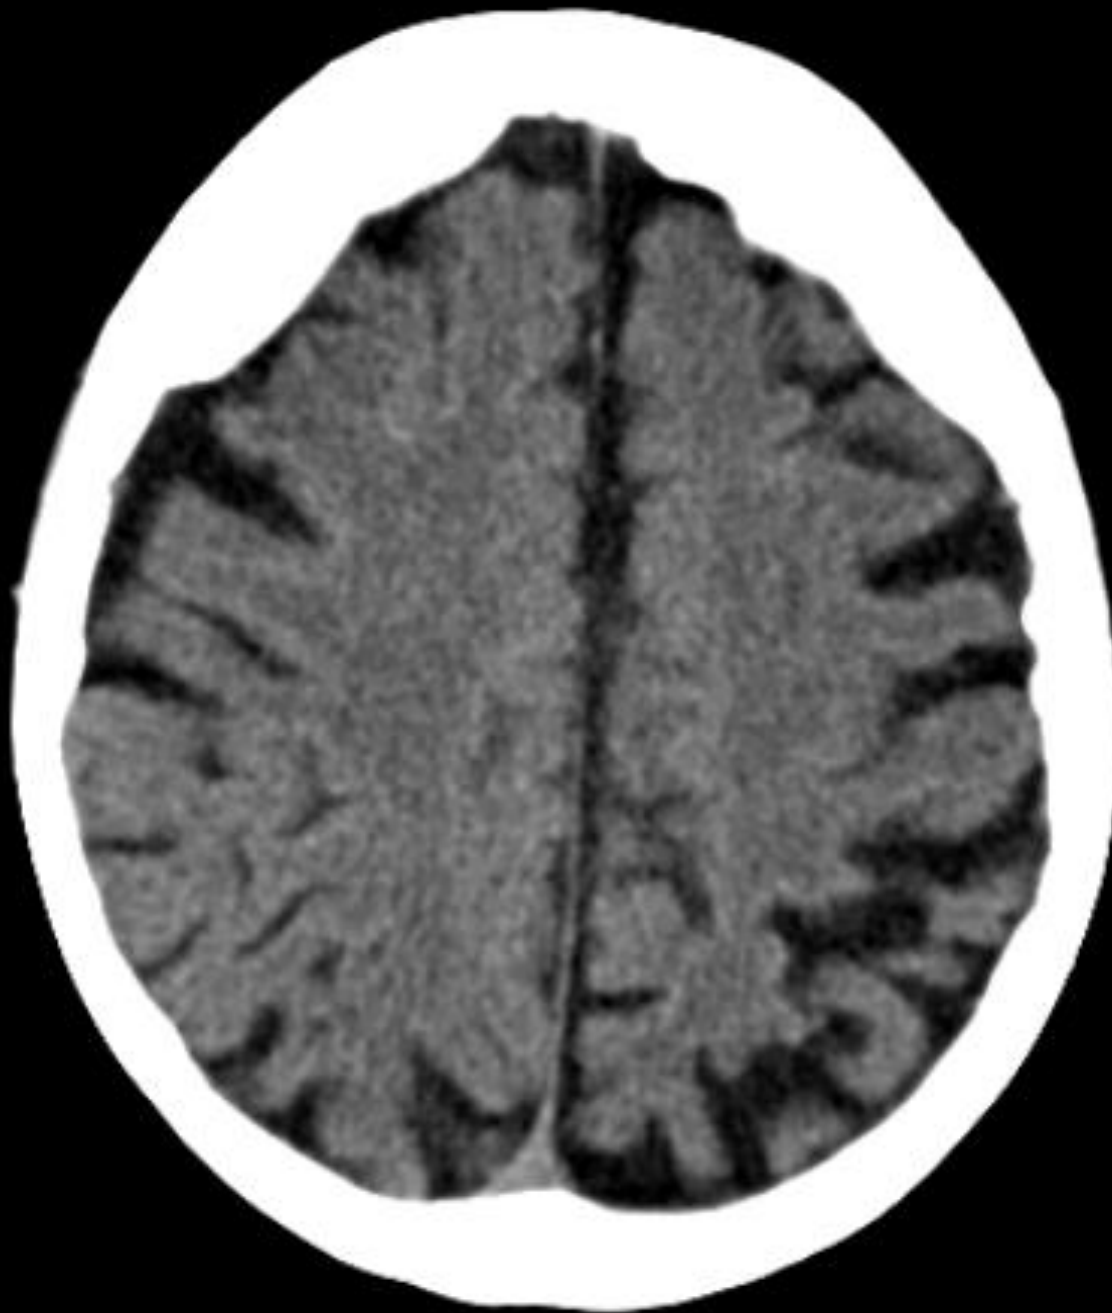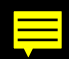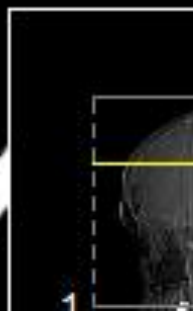

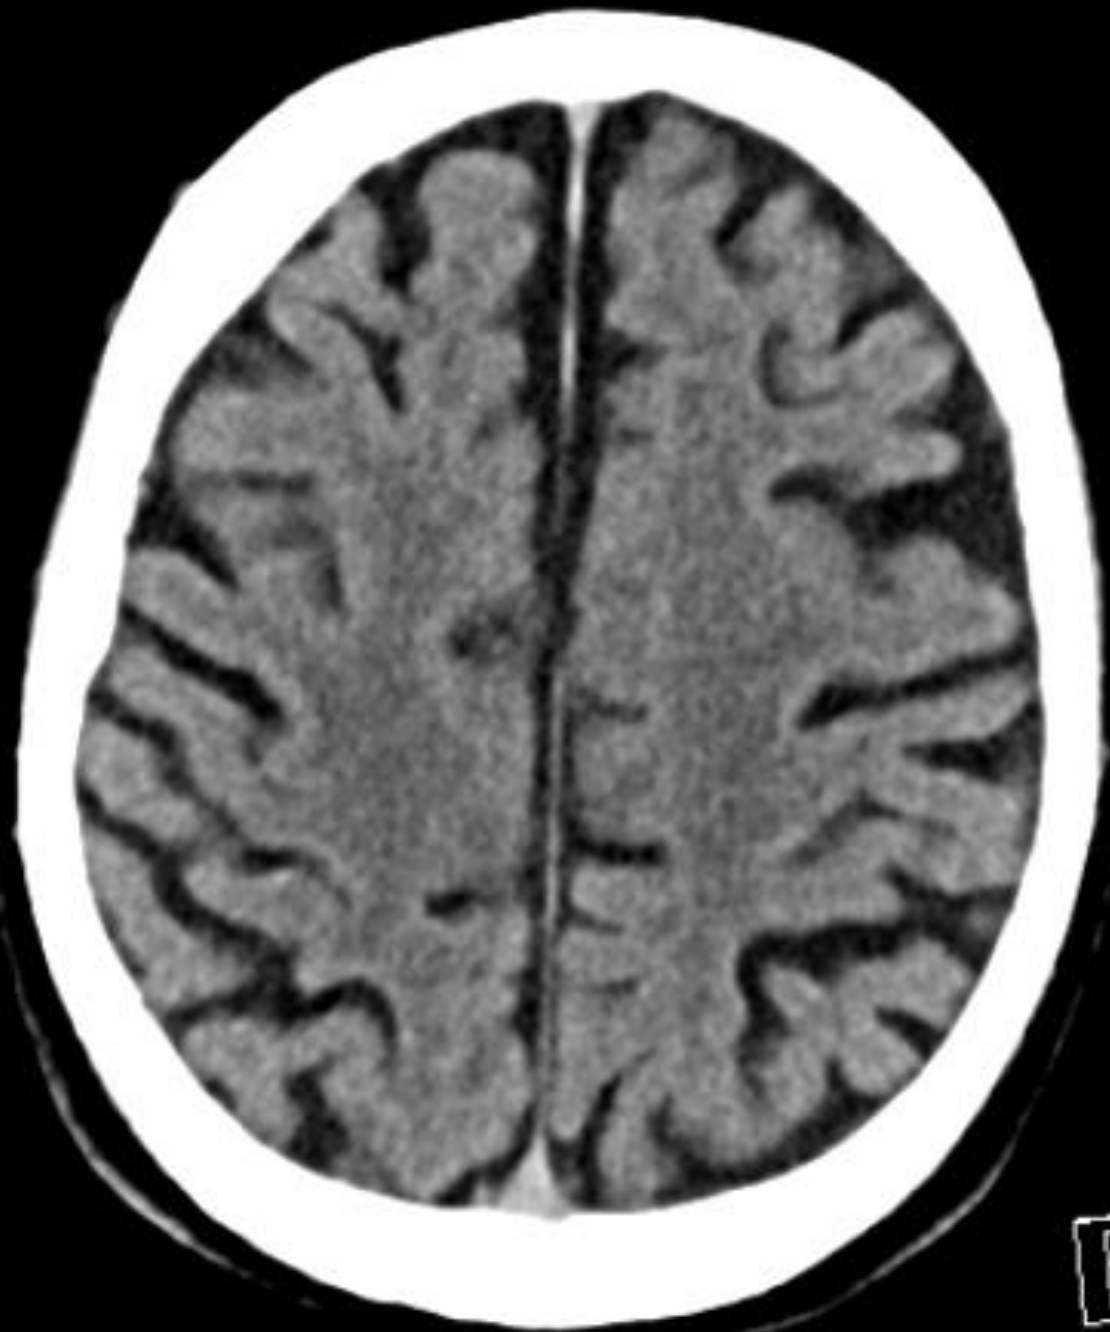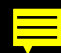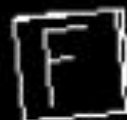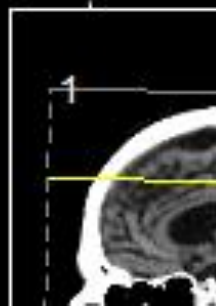

20

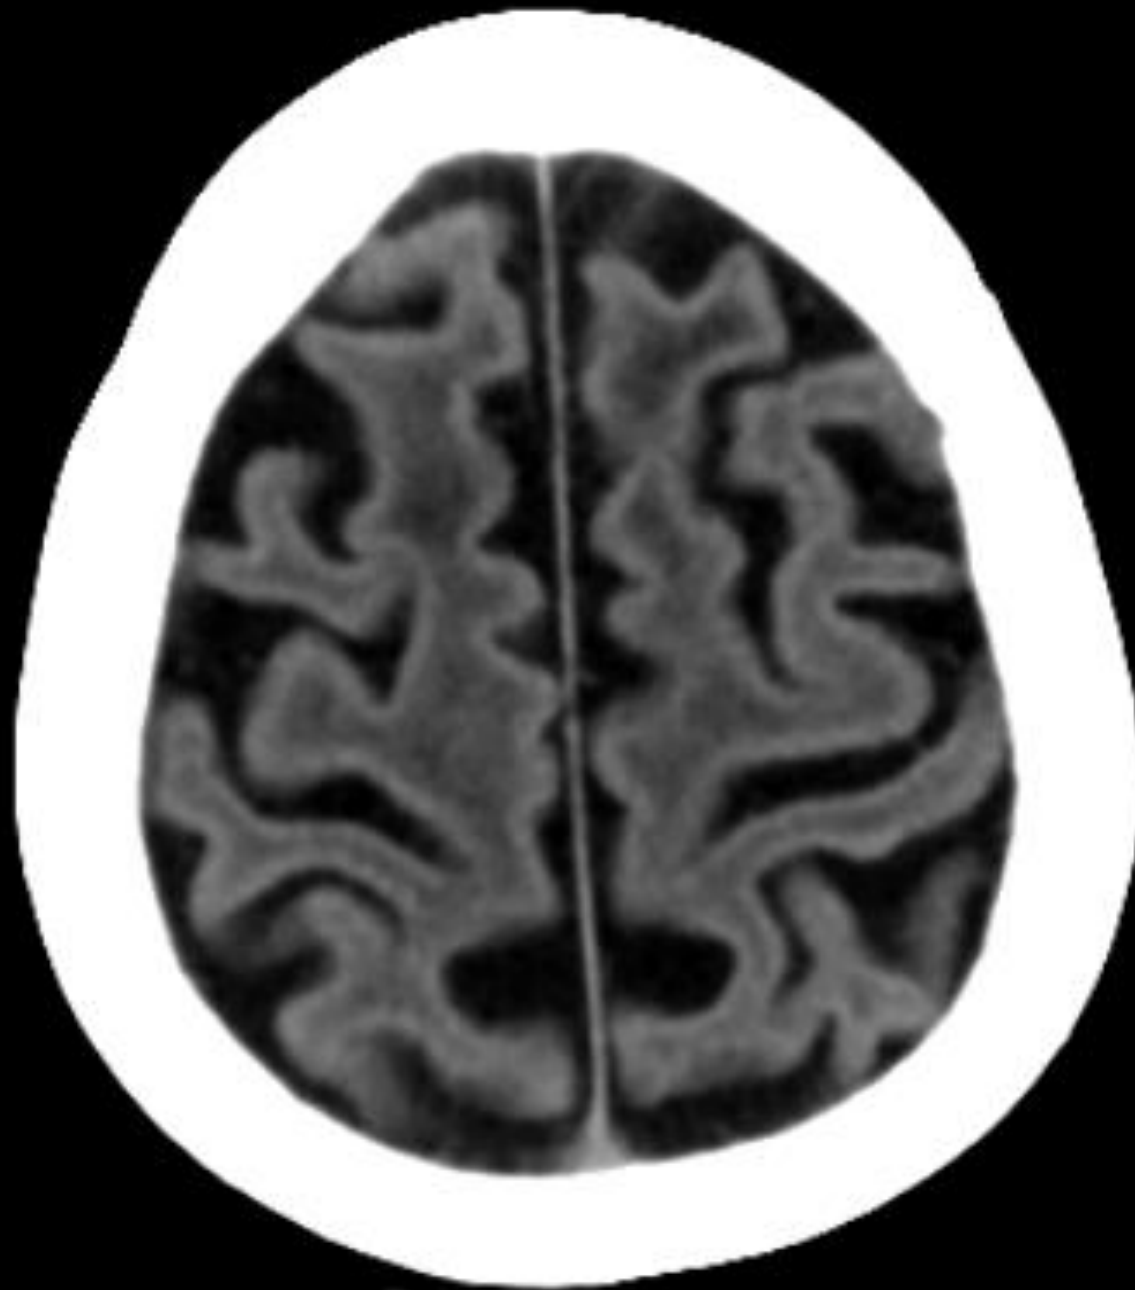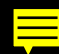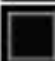

Supplement: 13244_2016_521_MOESM6_ESM.pdf [file 13244_2016_521_MOESM6_ESM.pdf]
