# Supplementary material for: Imaging biomarkers of dementia: recommended visual rating scales with teaching cases
Source: PubMed Central journal article supplement (PMC5265189; doi:10.1007/s13244-016-0521-6), 2016-12-21

1

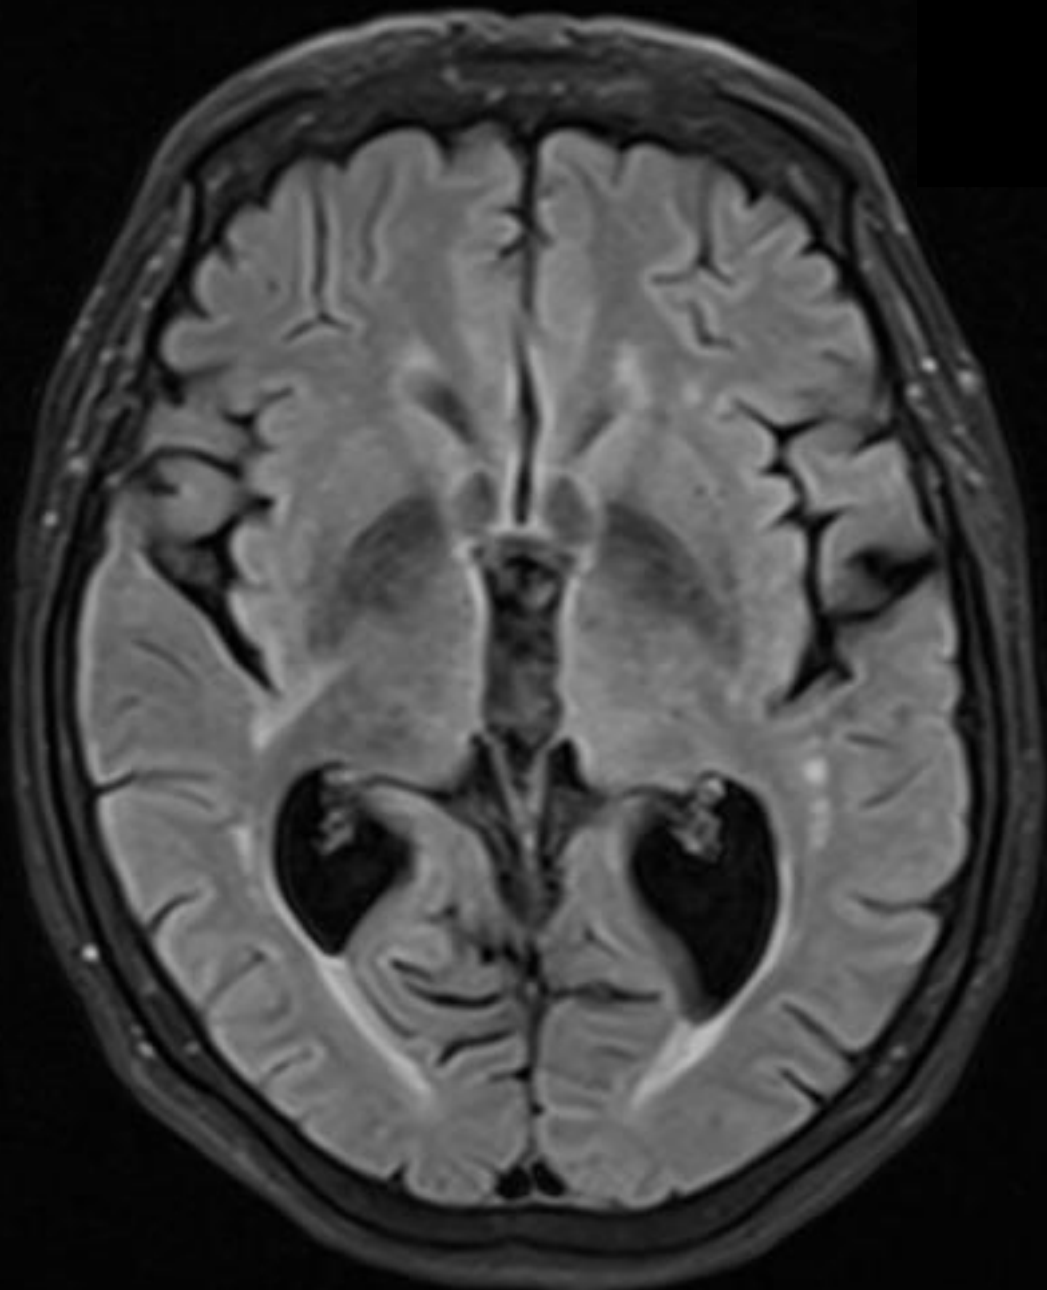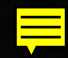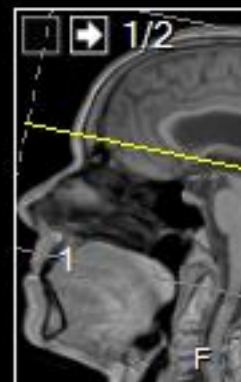

2

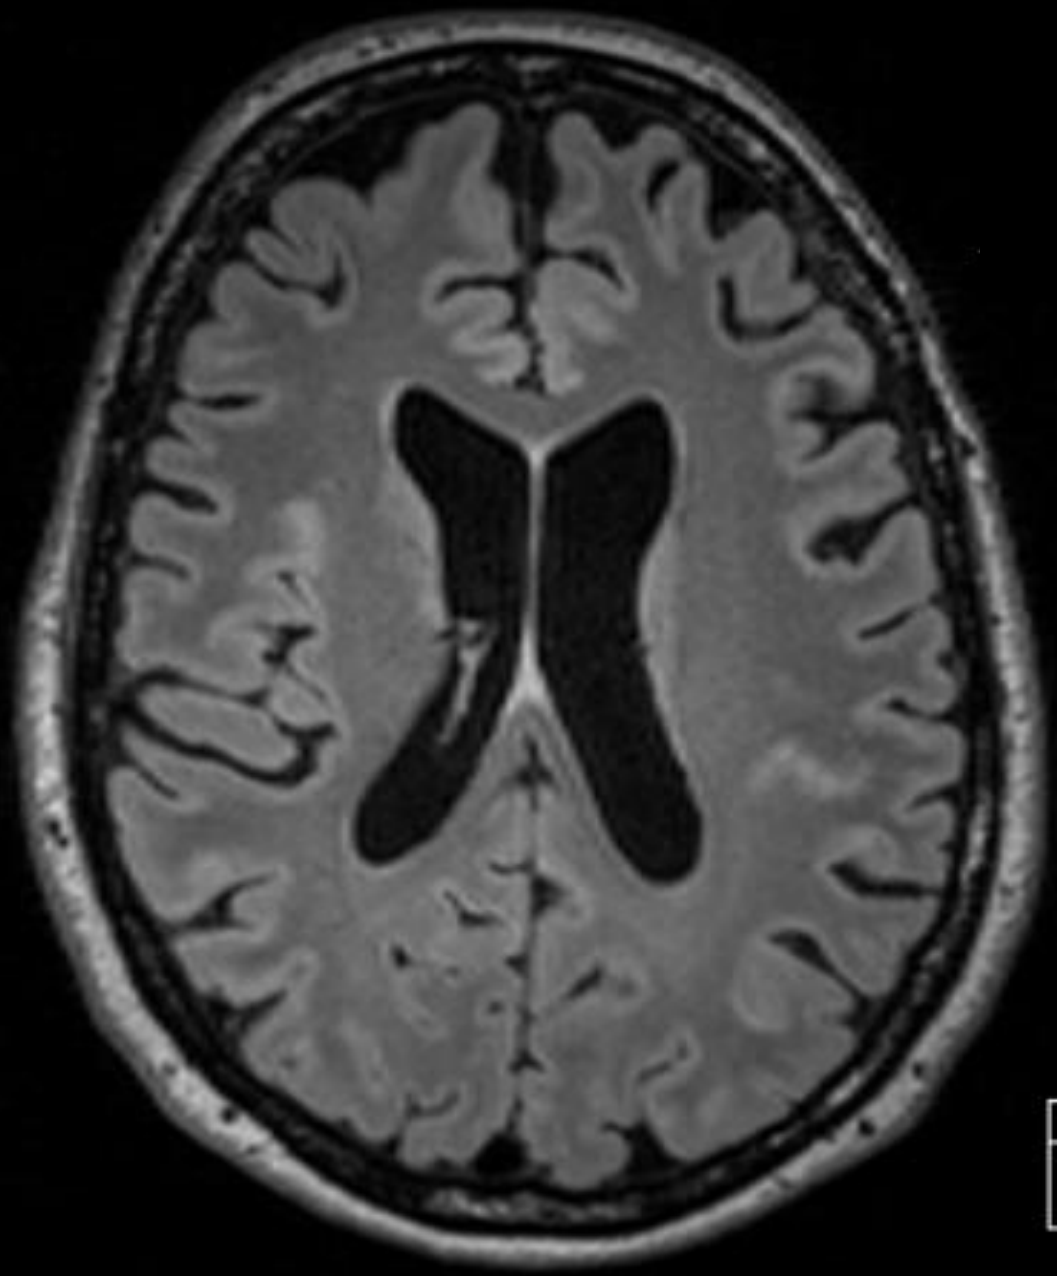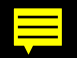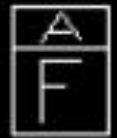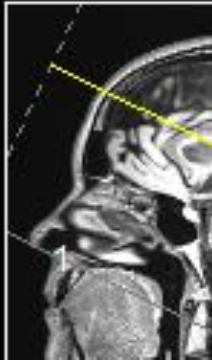

3

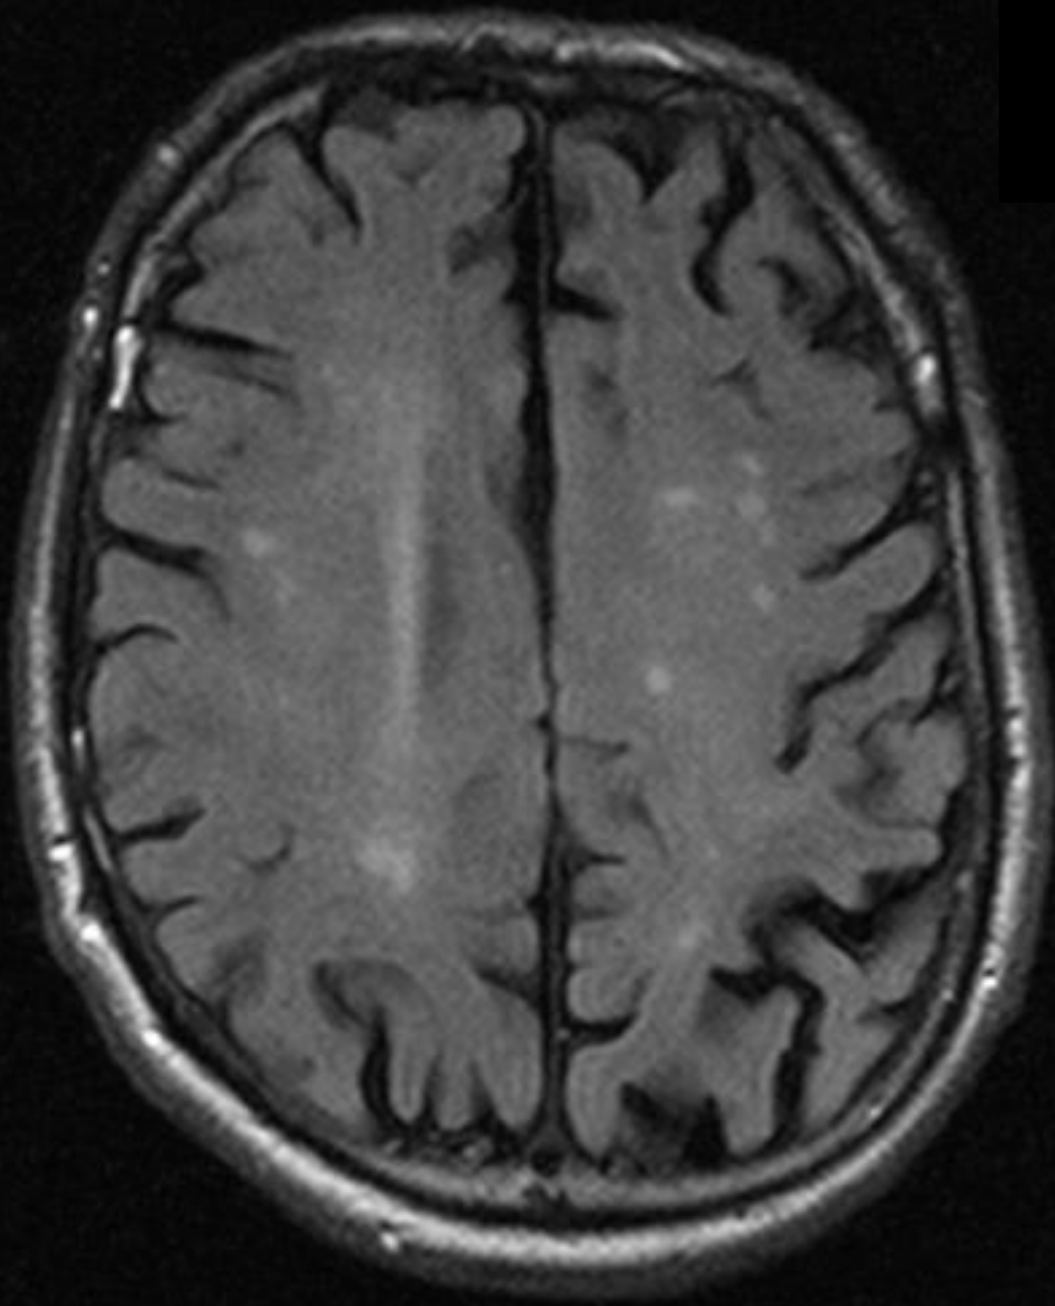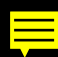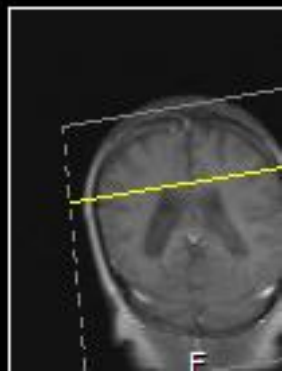

4

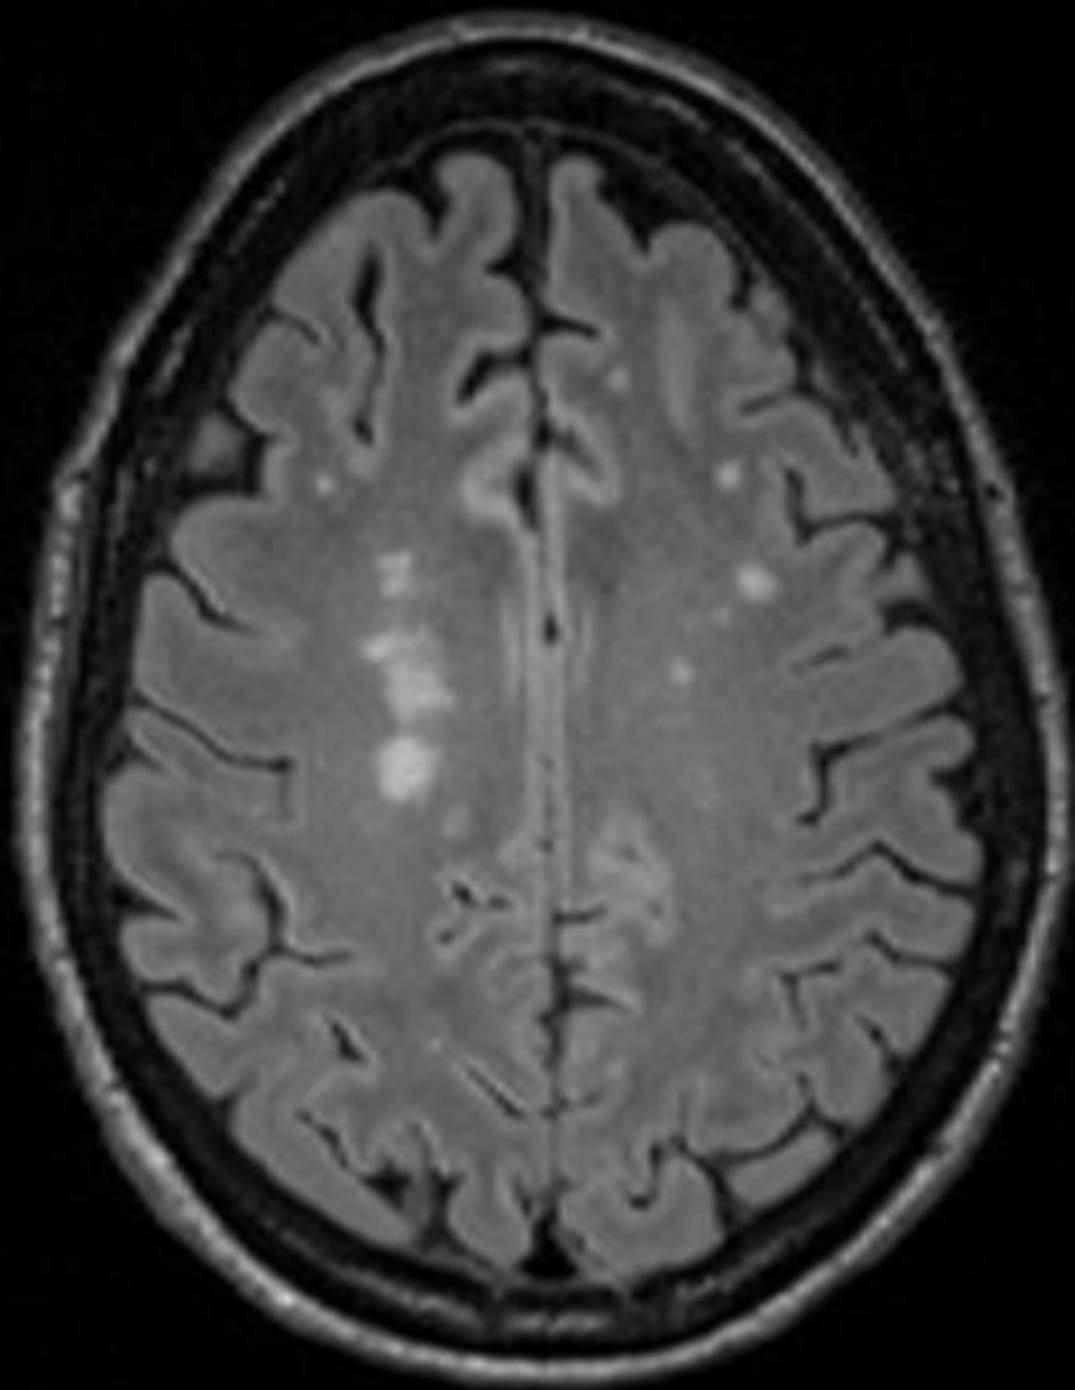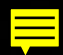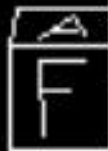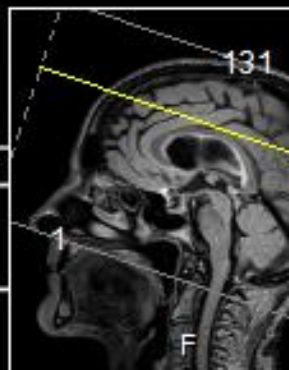

5

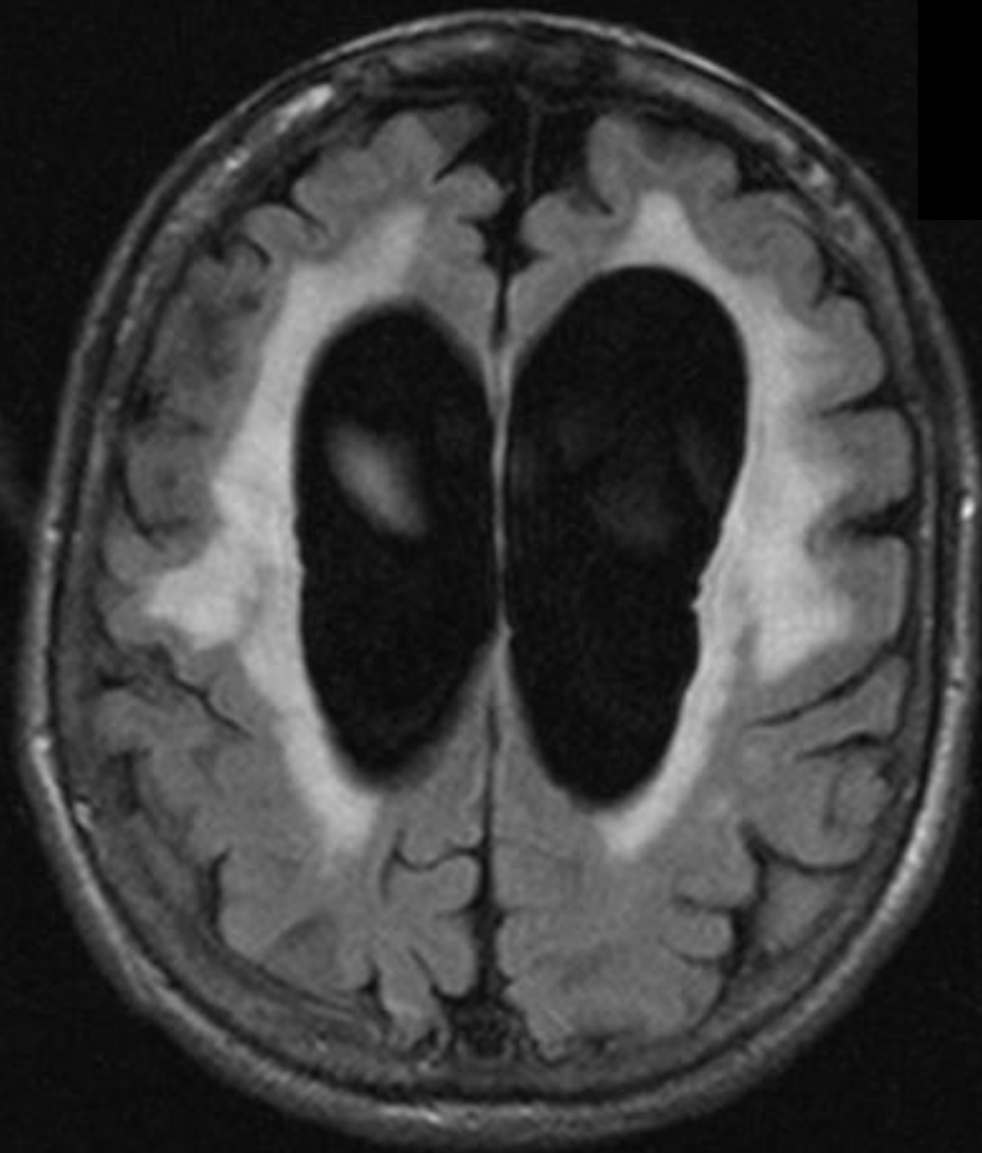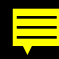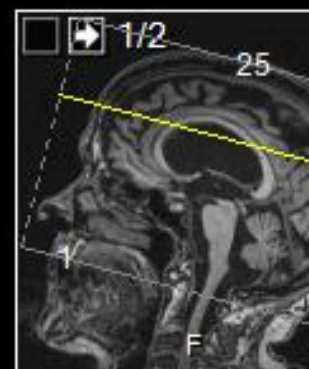

6

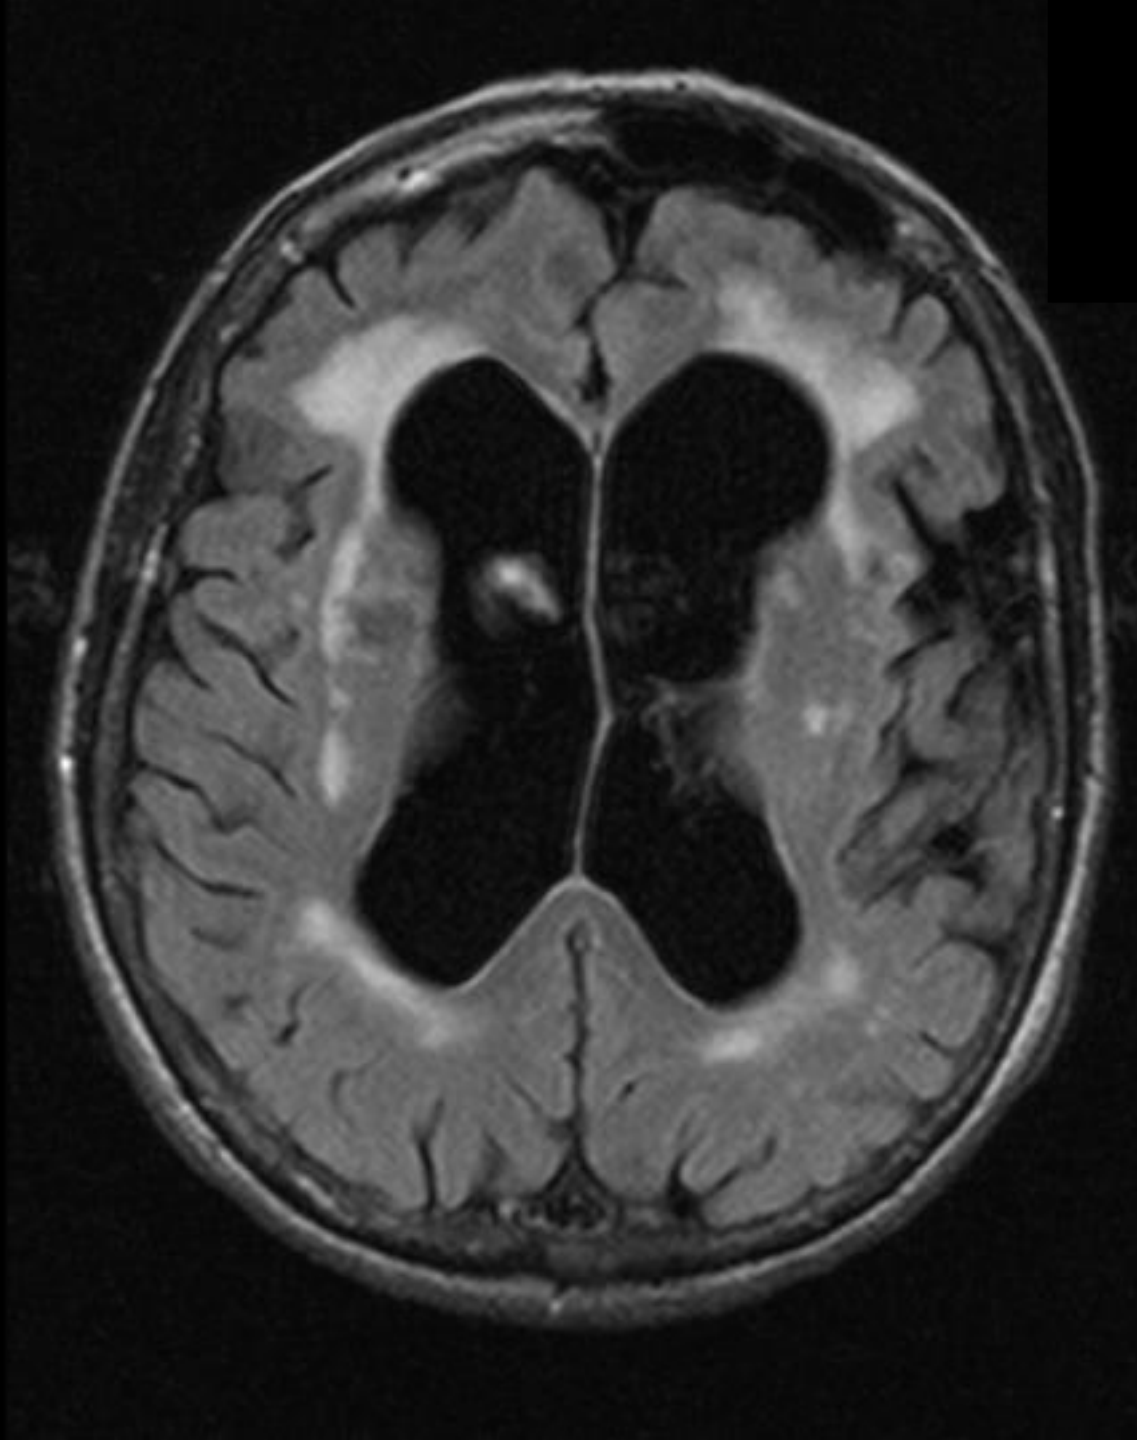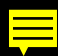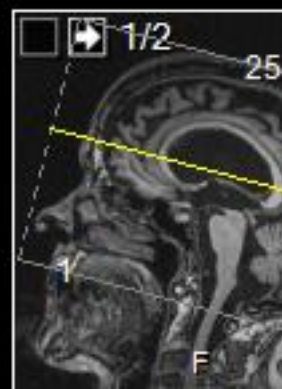

7

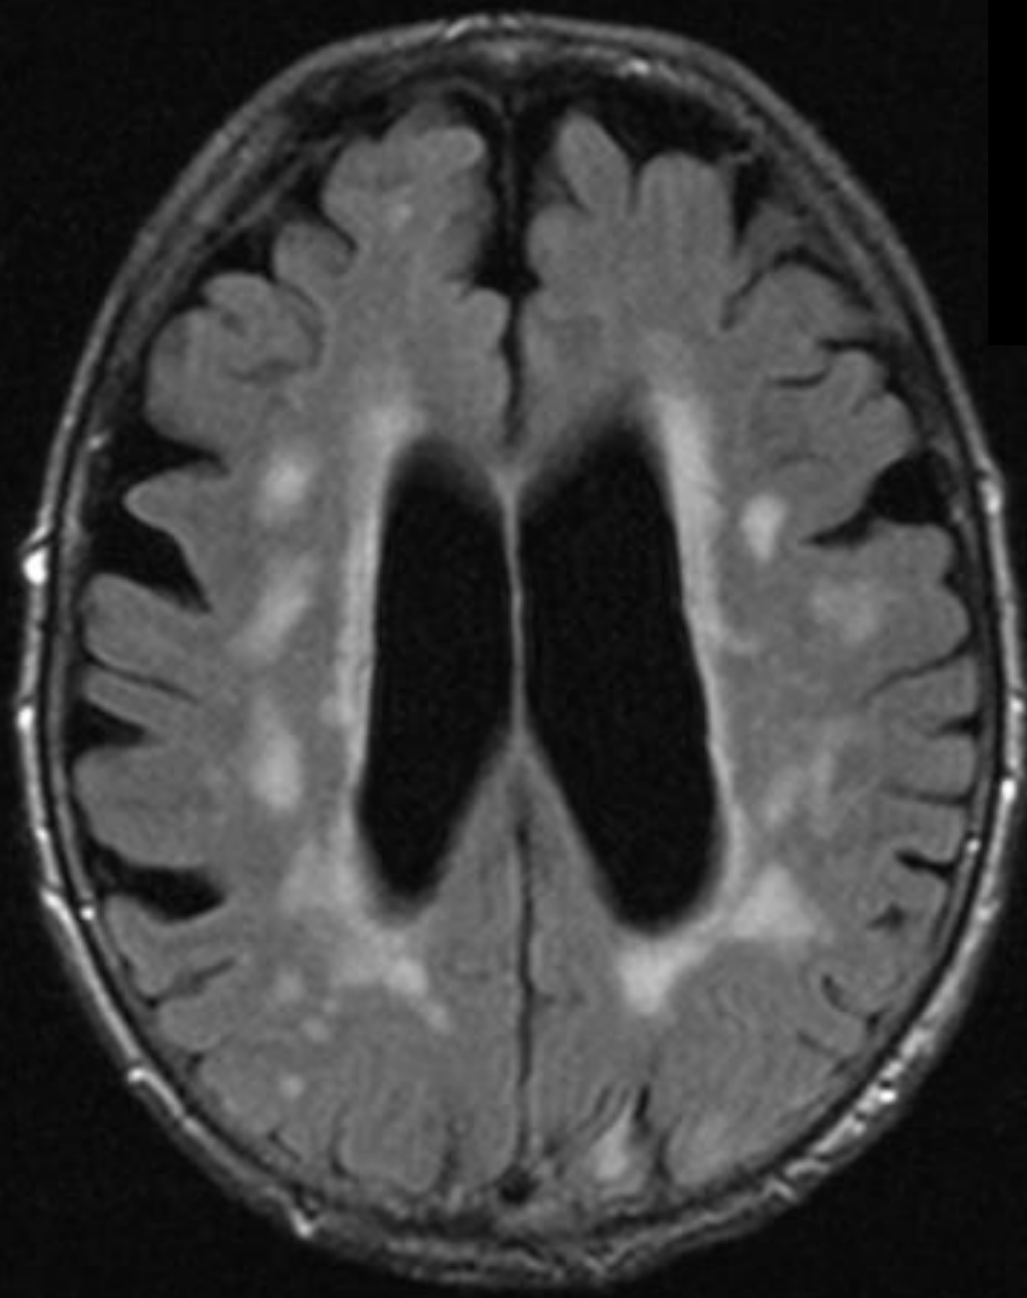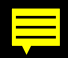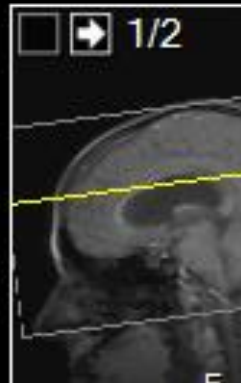

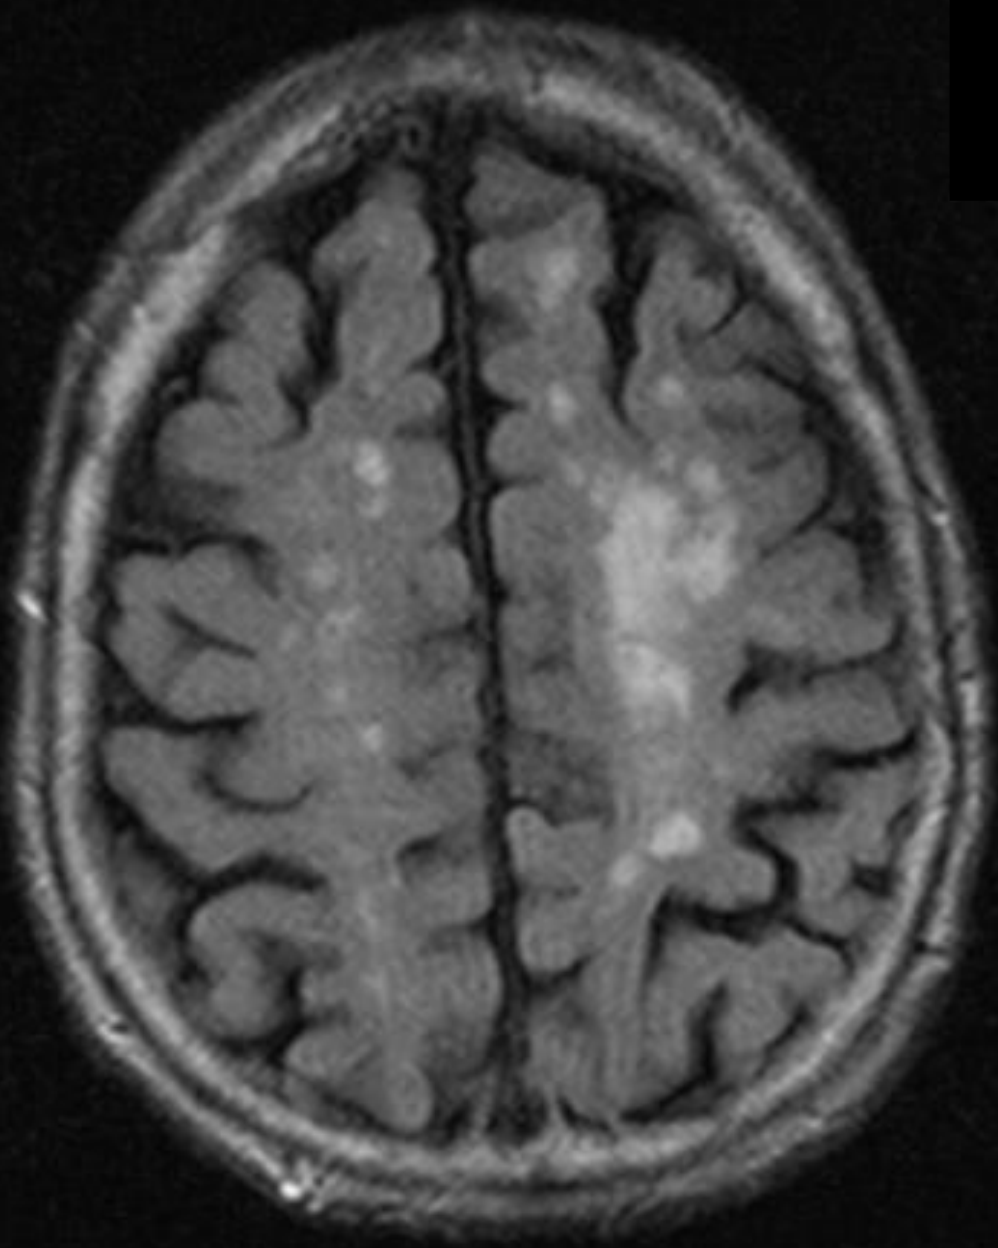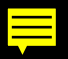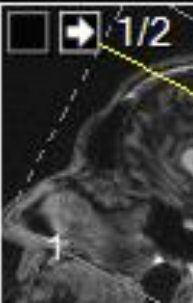



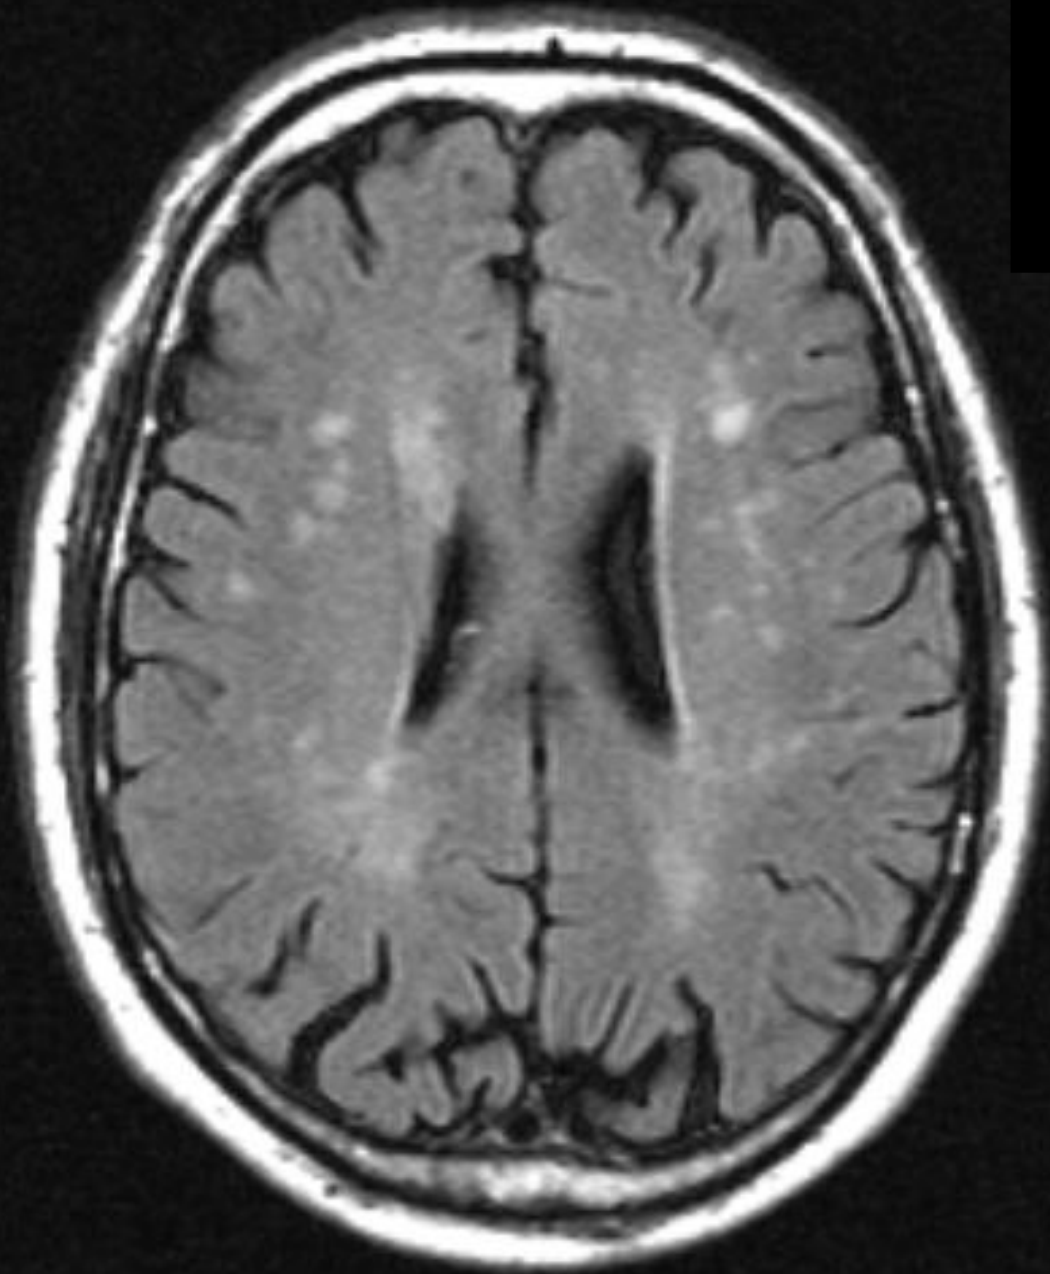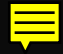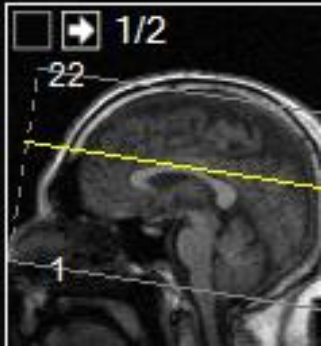

10

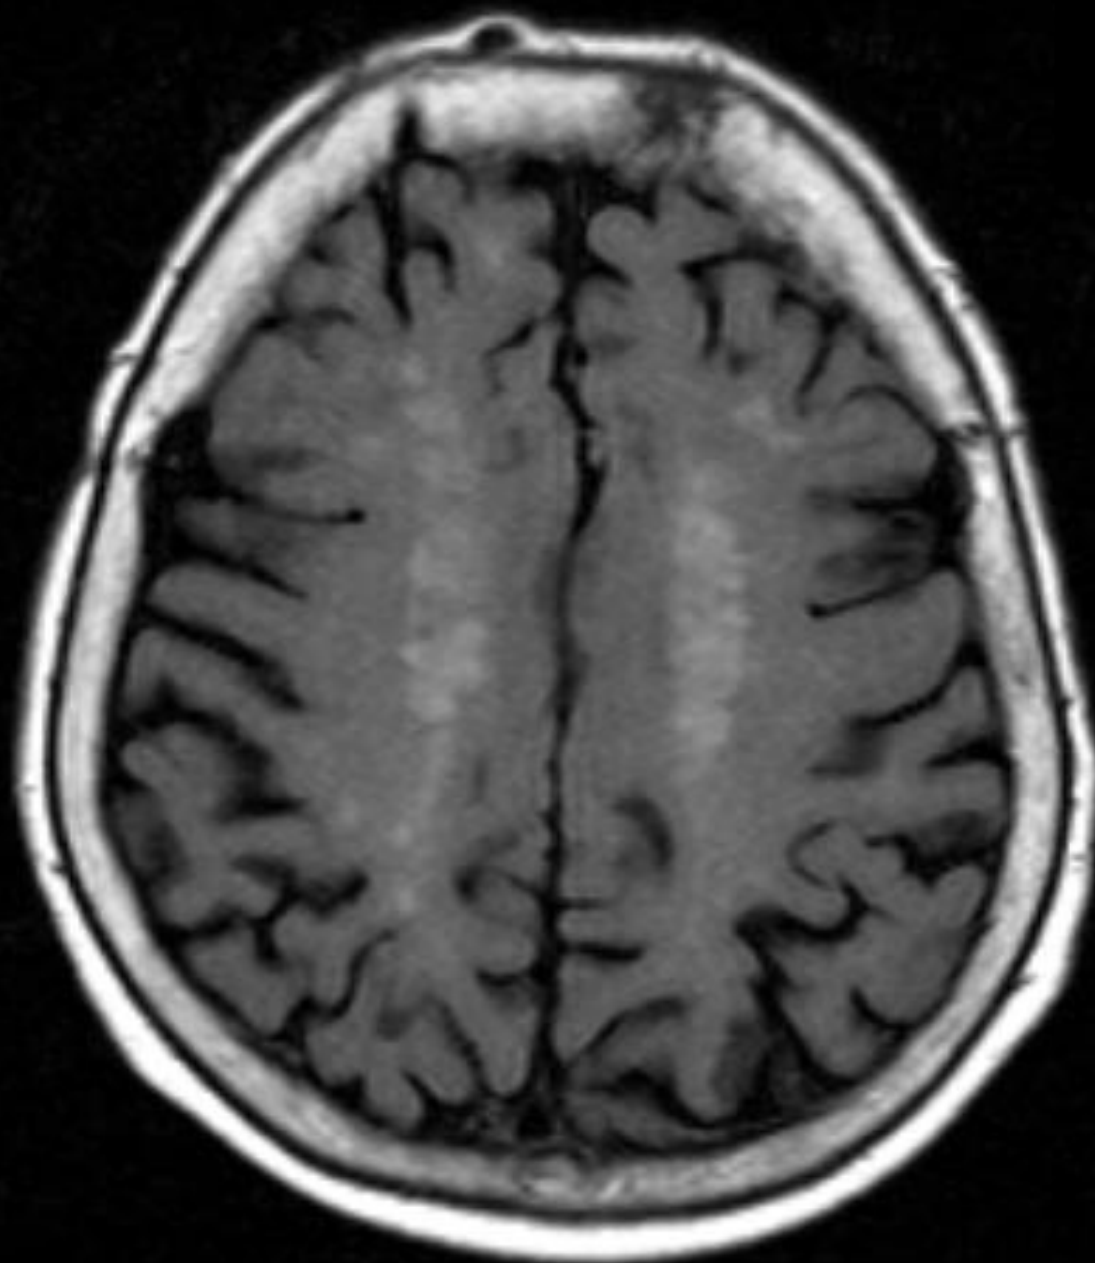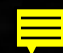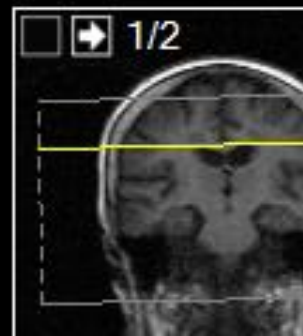

11

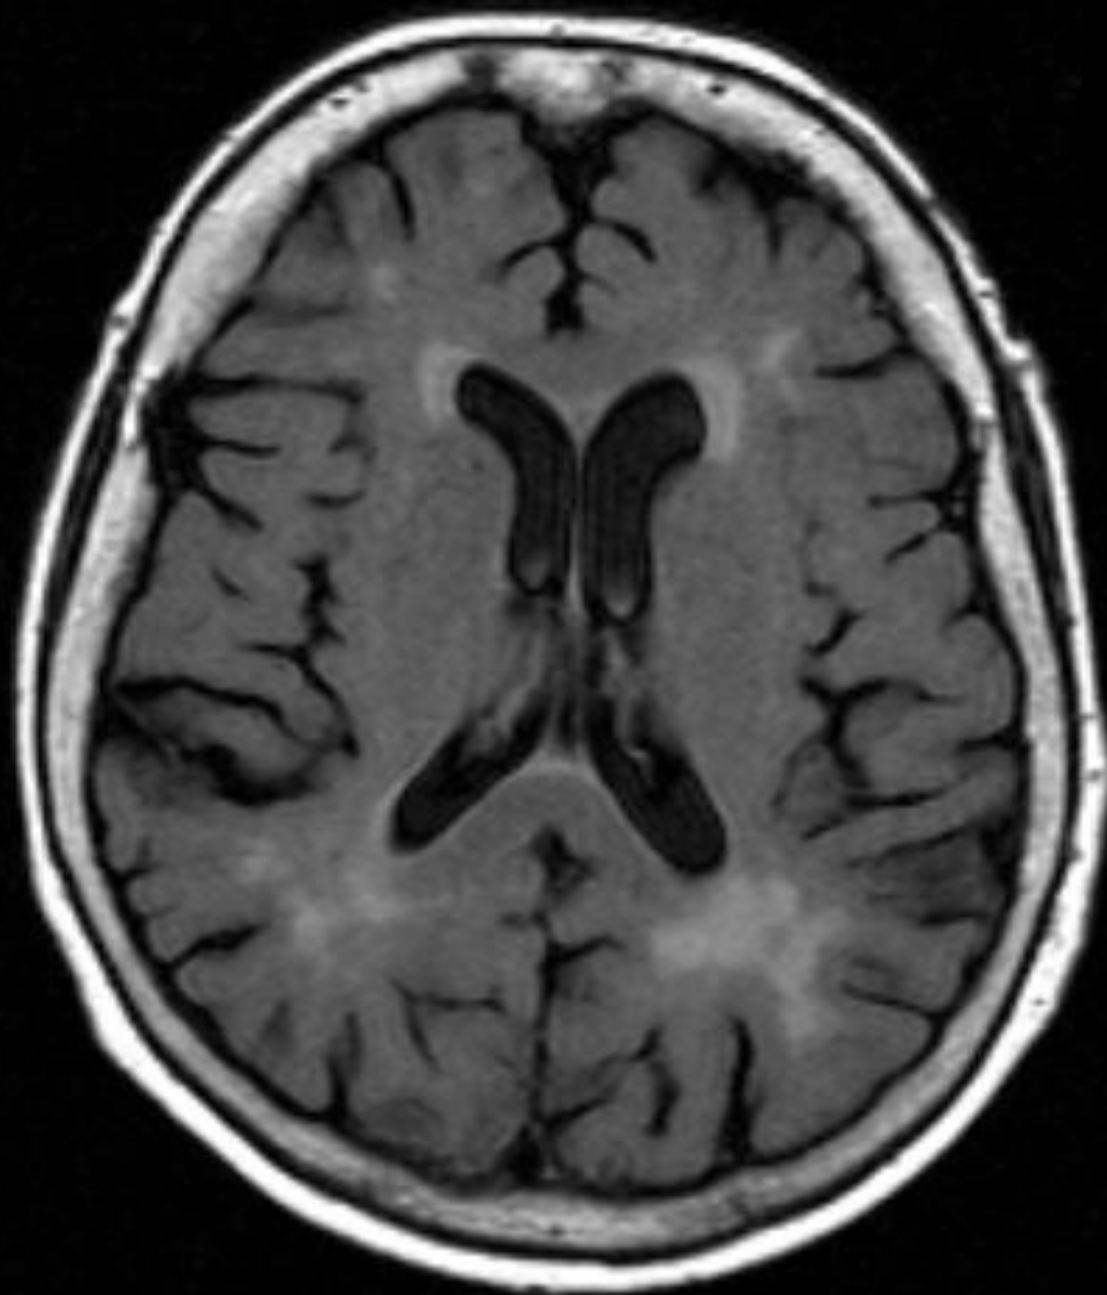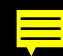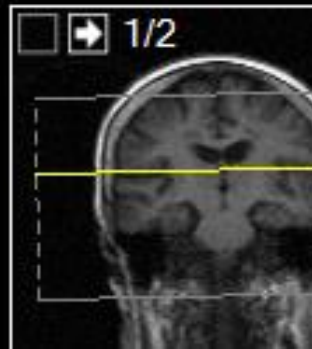

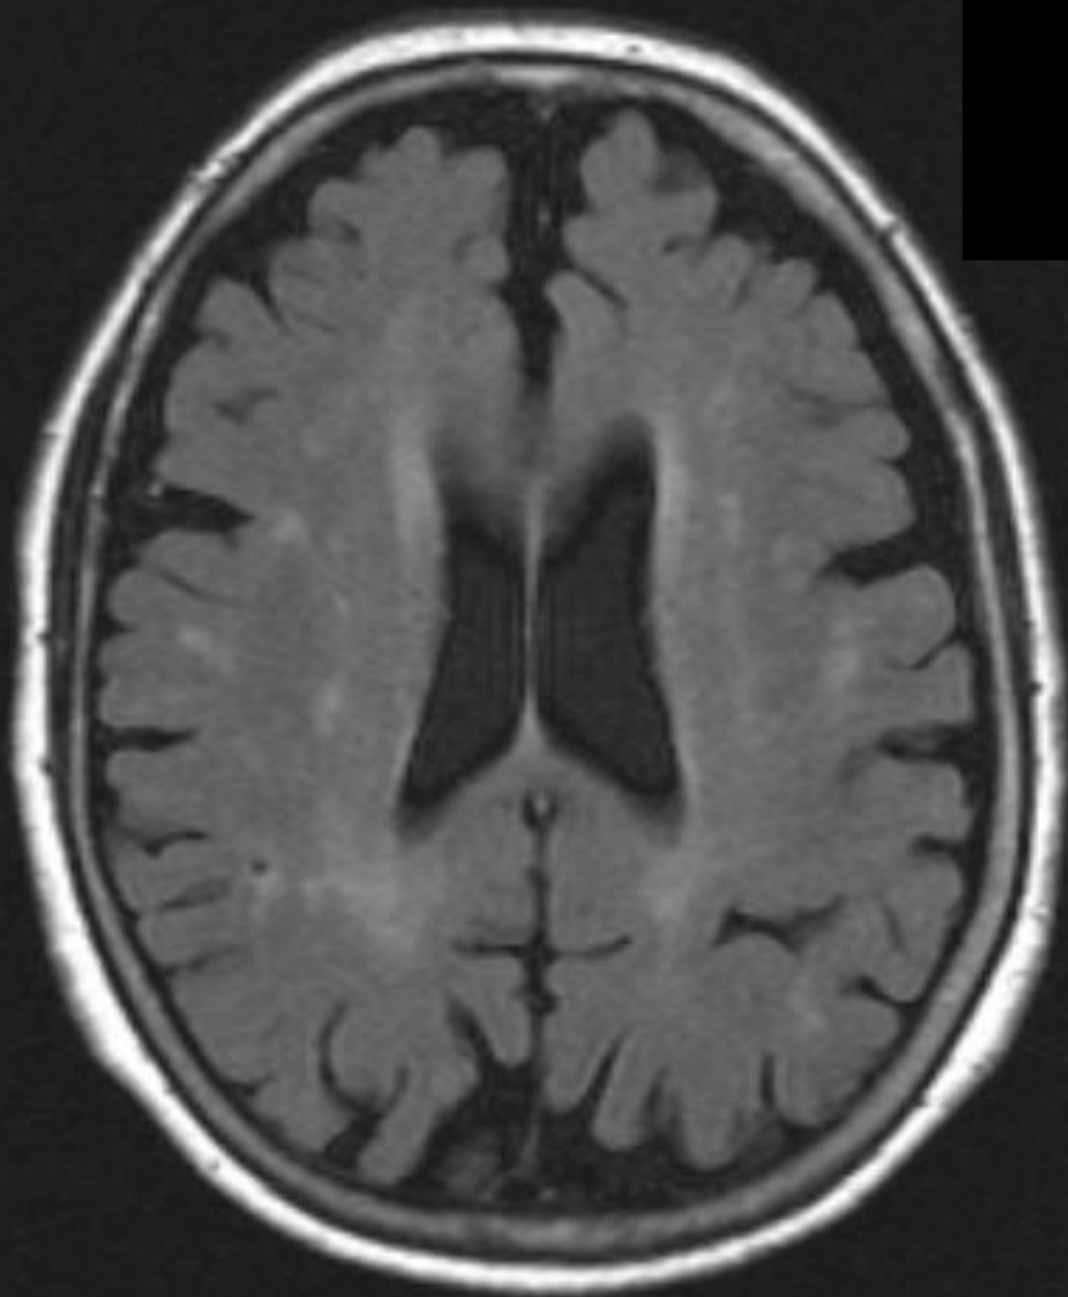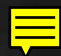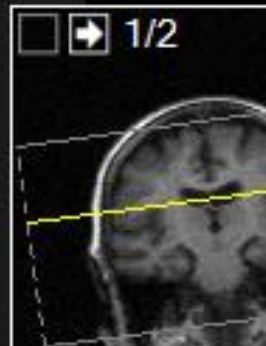

13

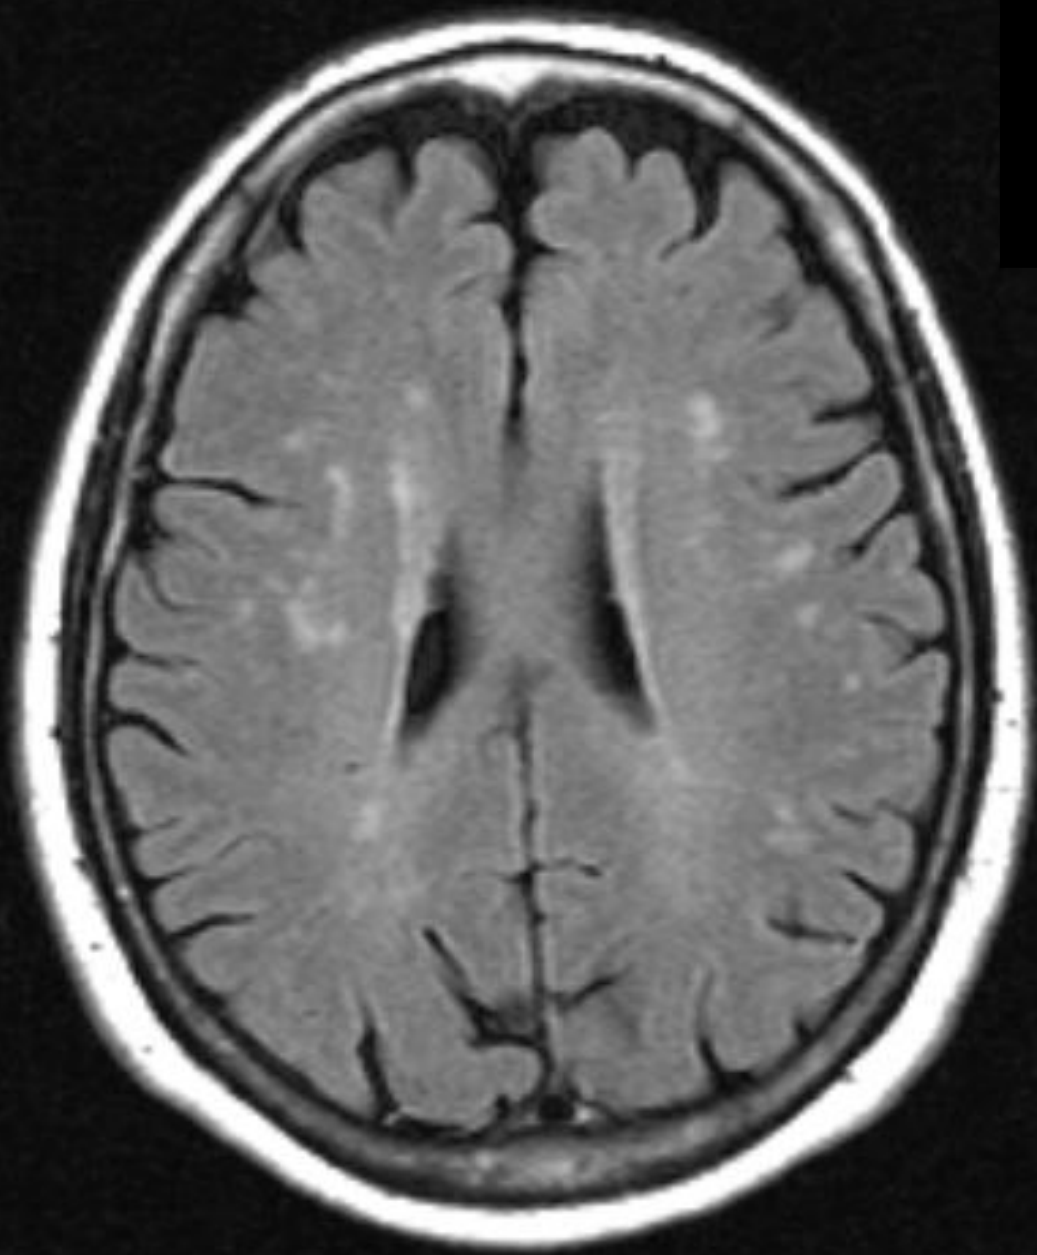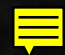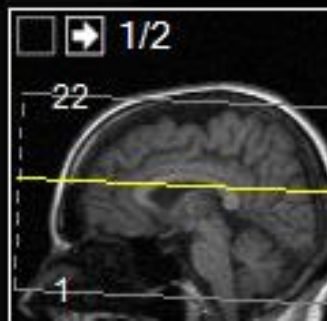

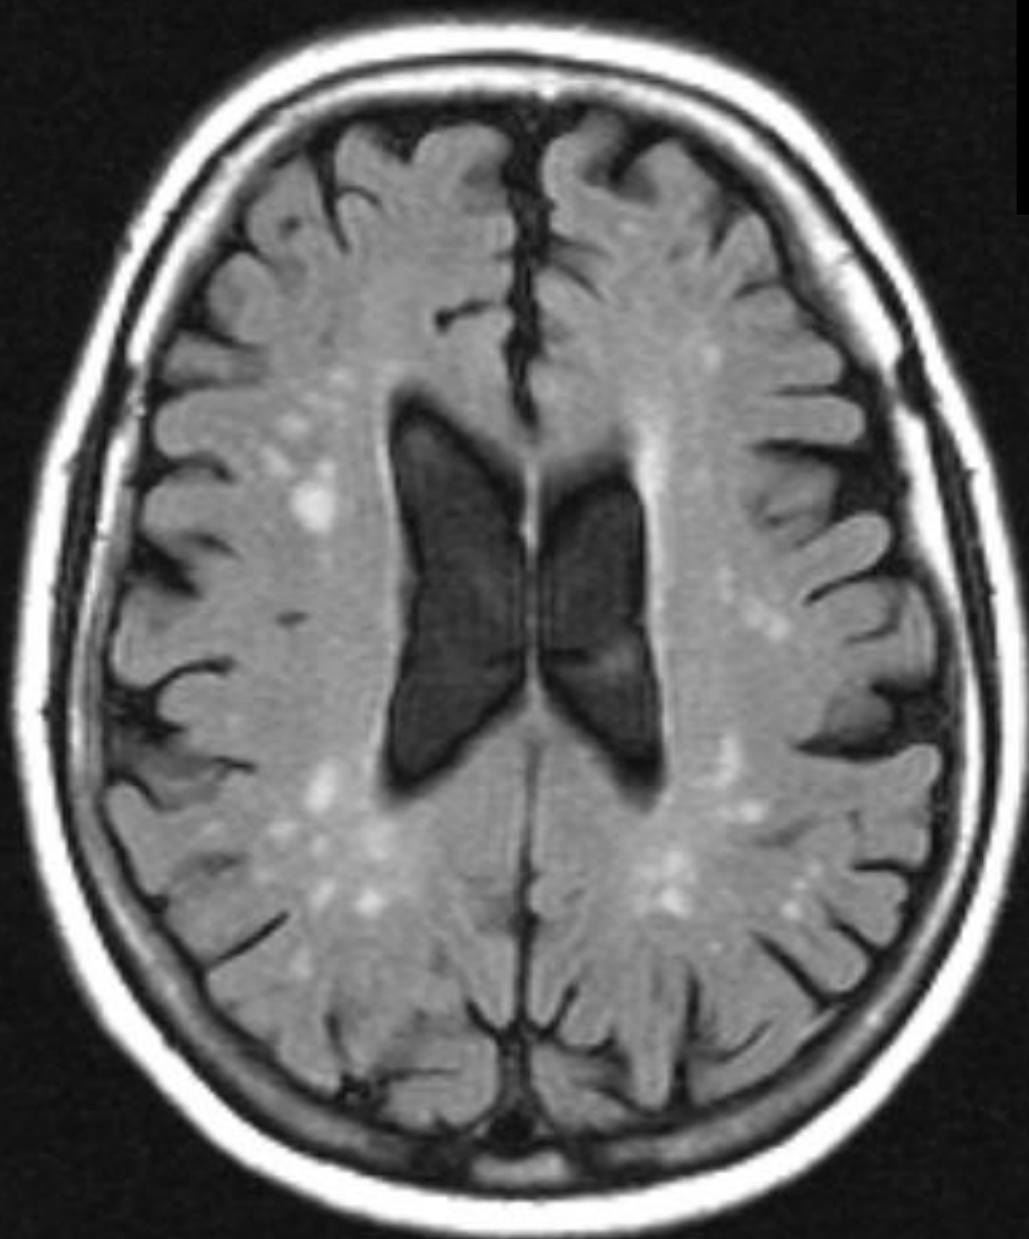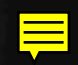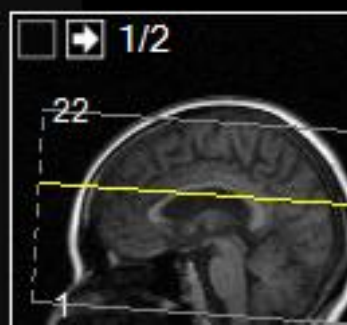

15

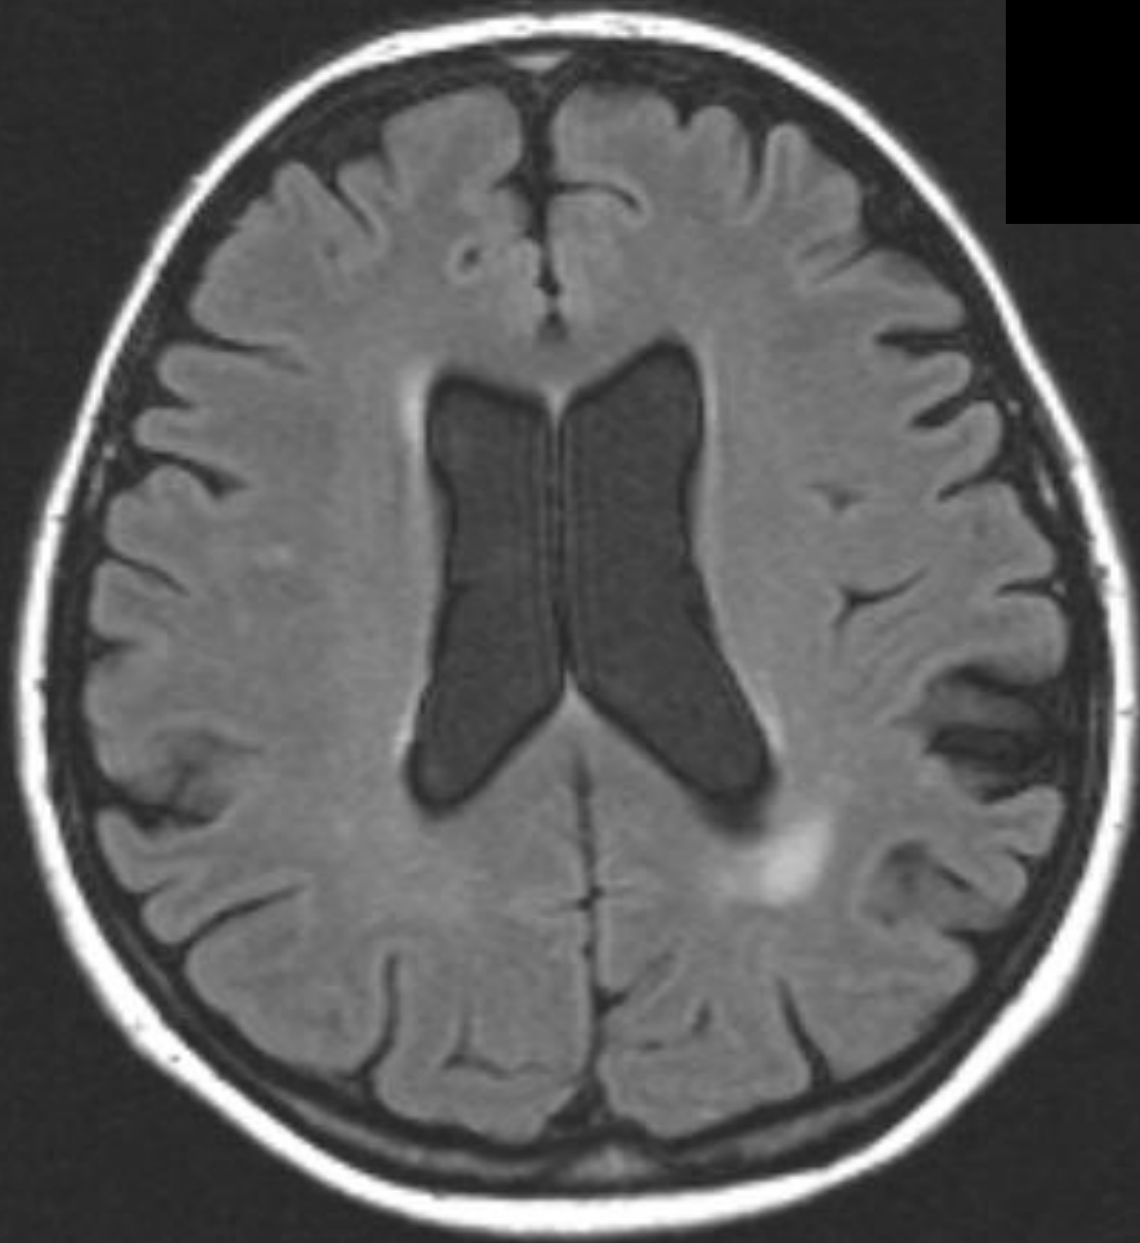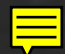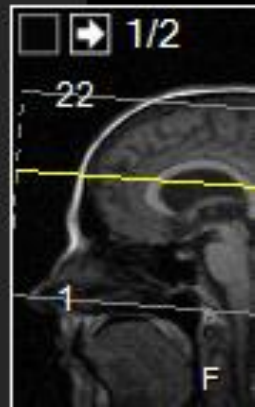

16

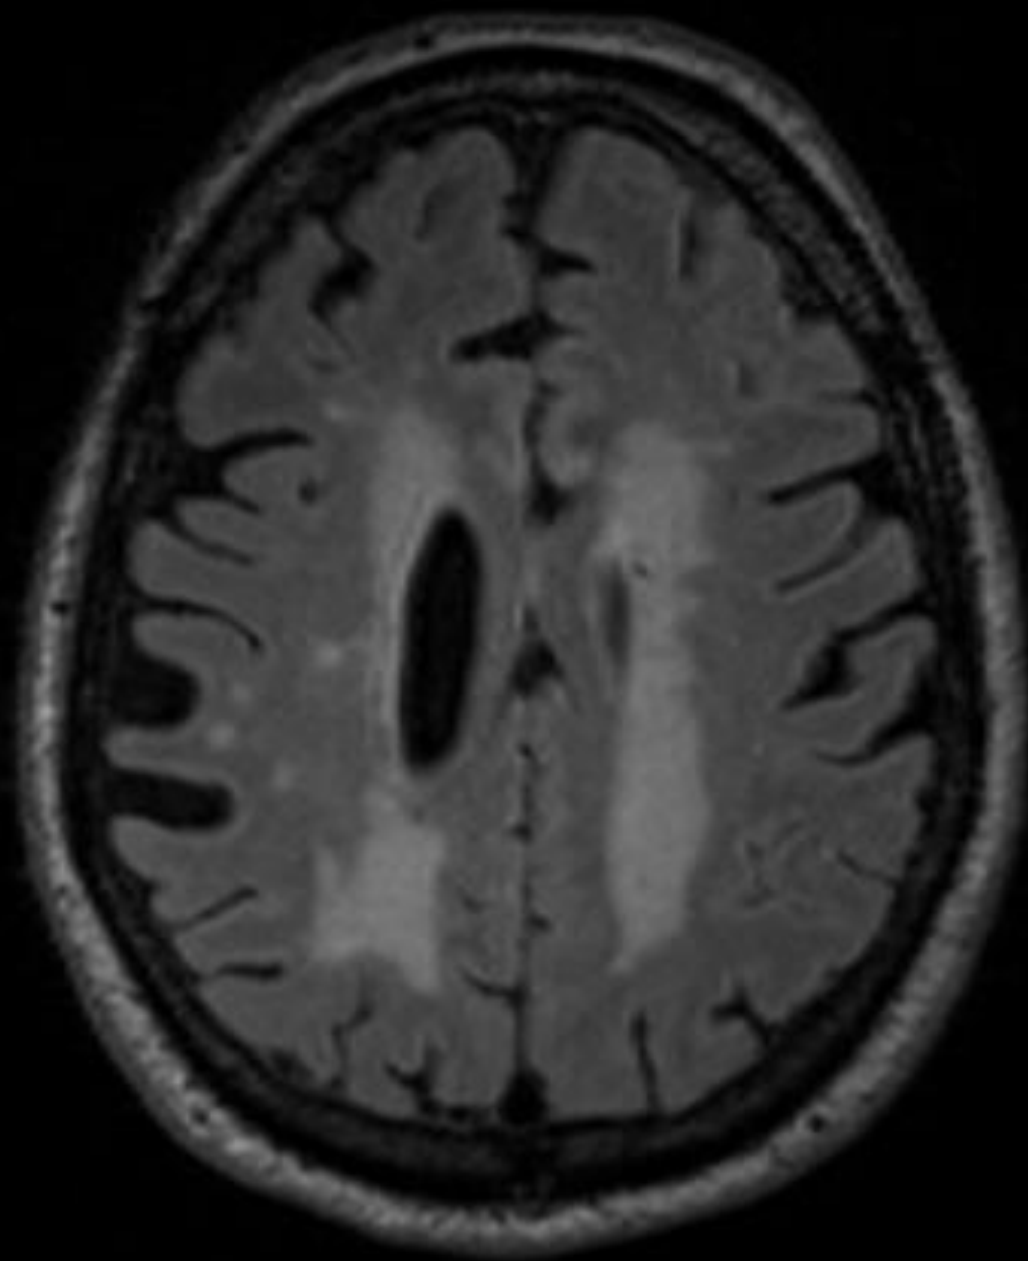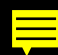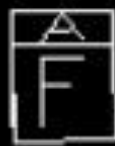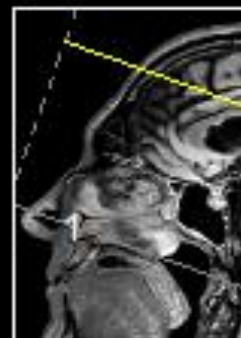



17

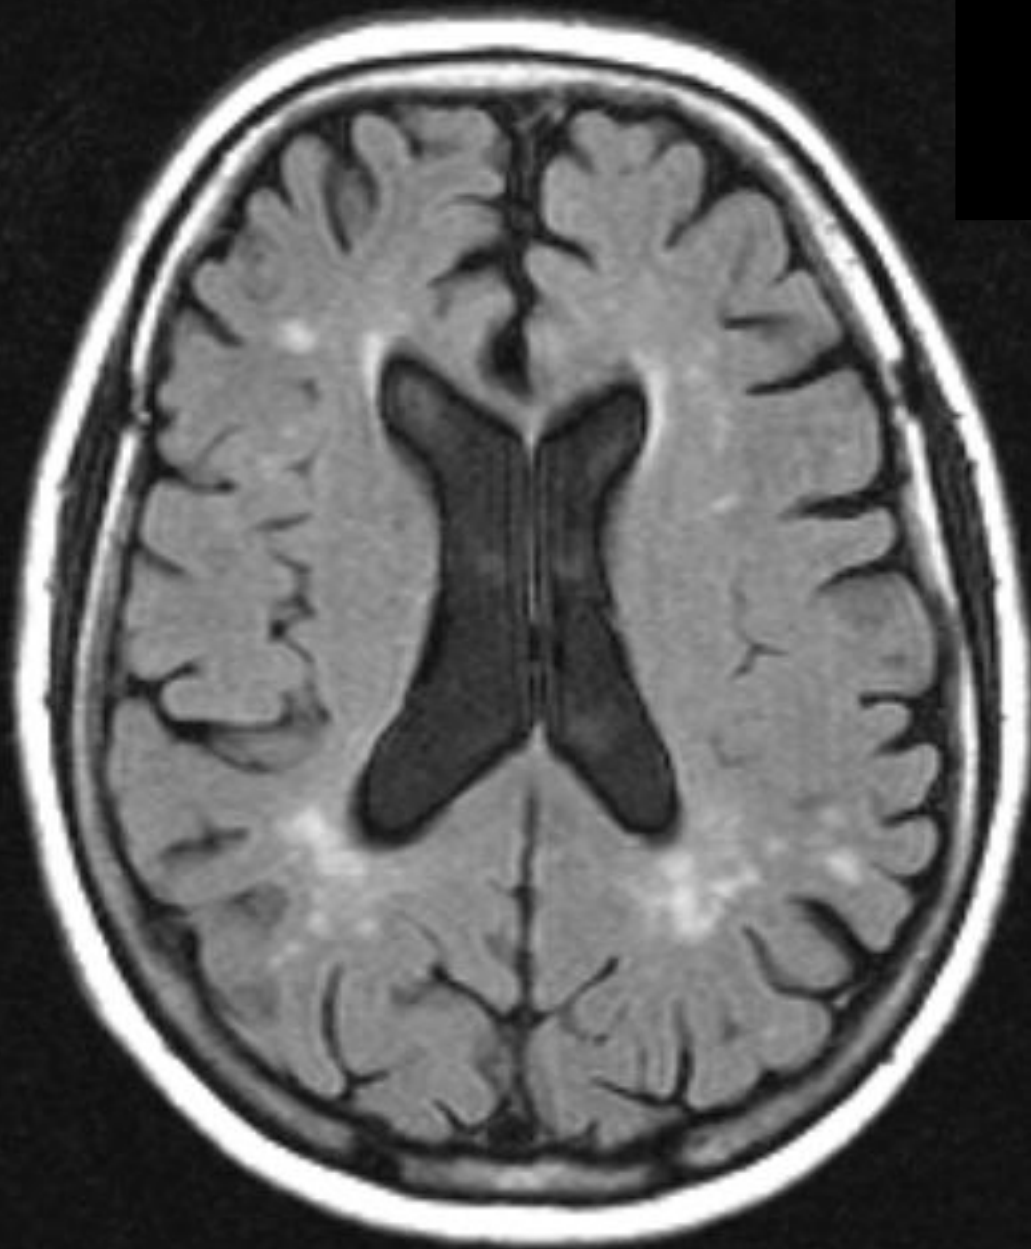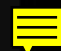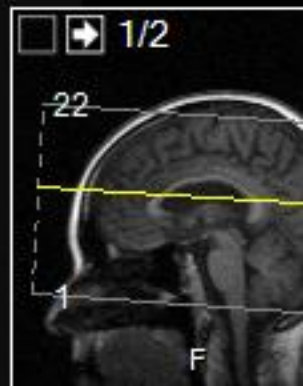

18

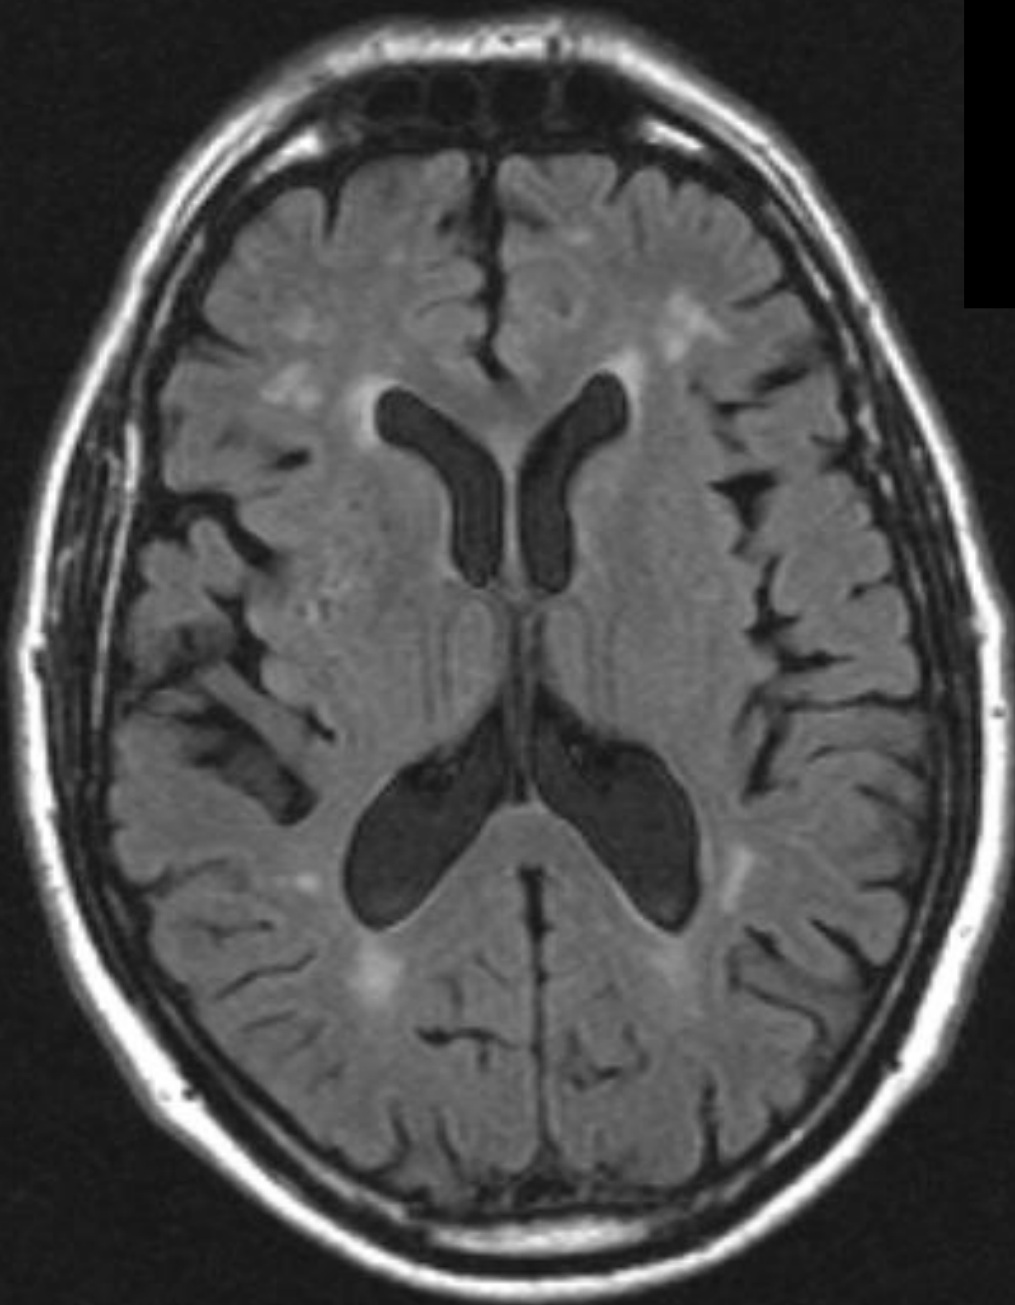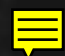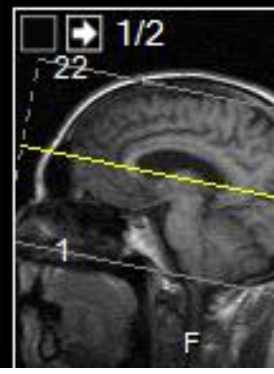

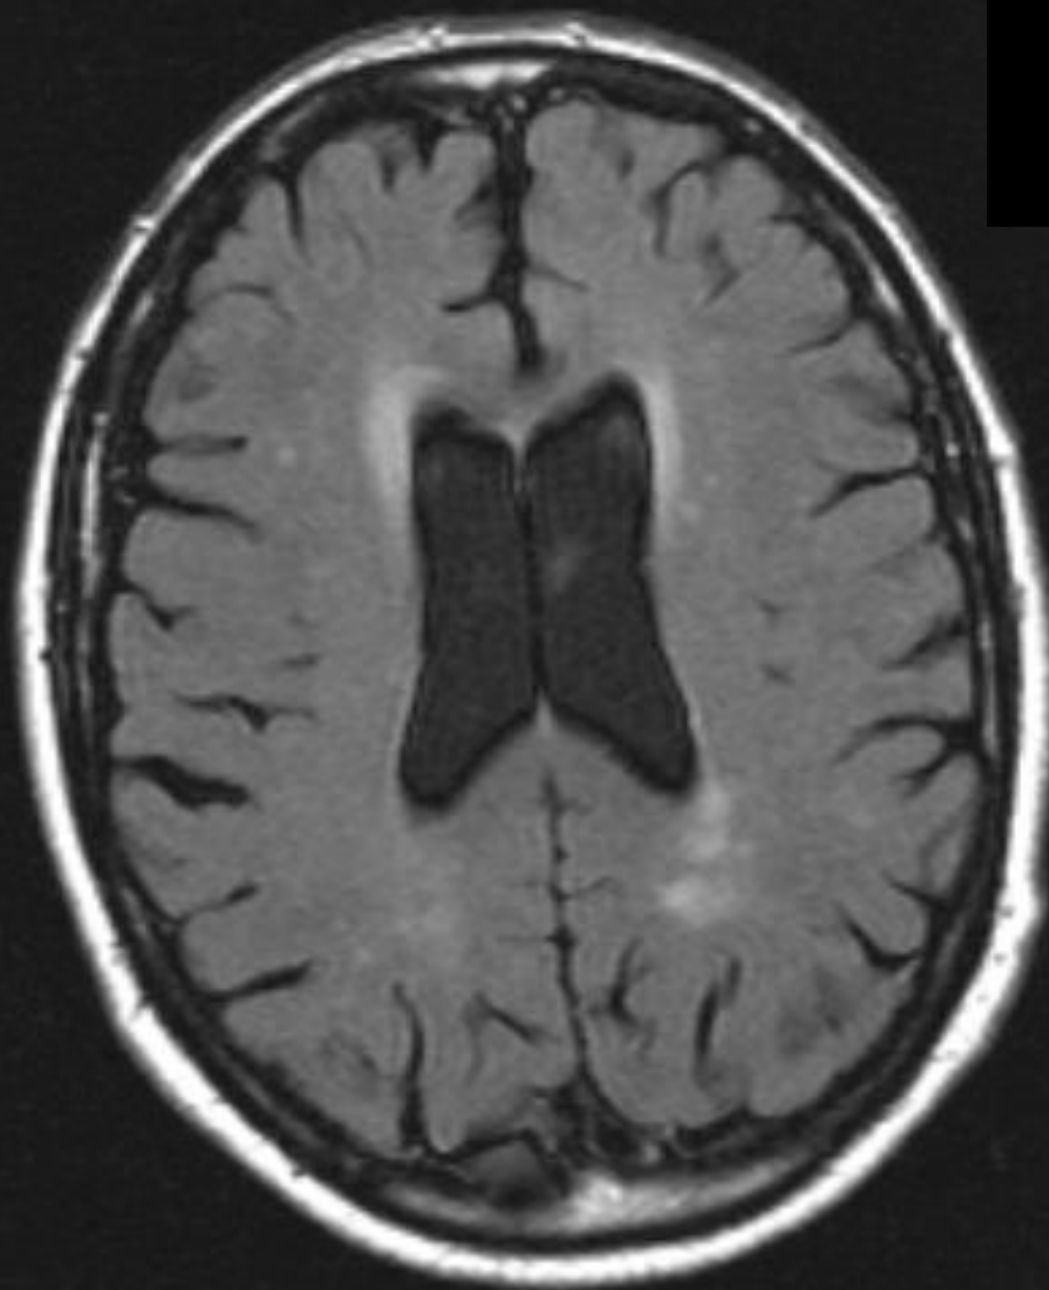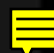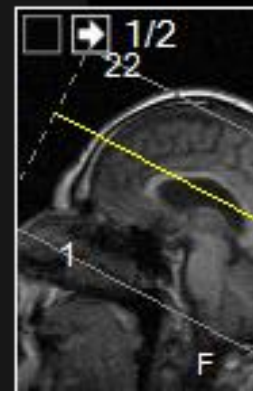

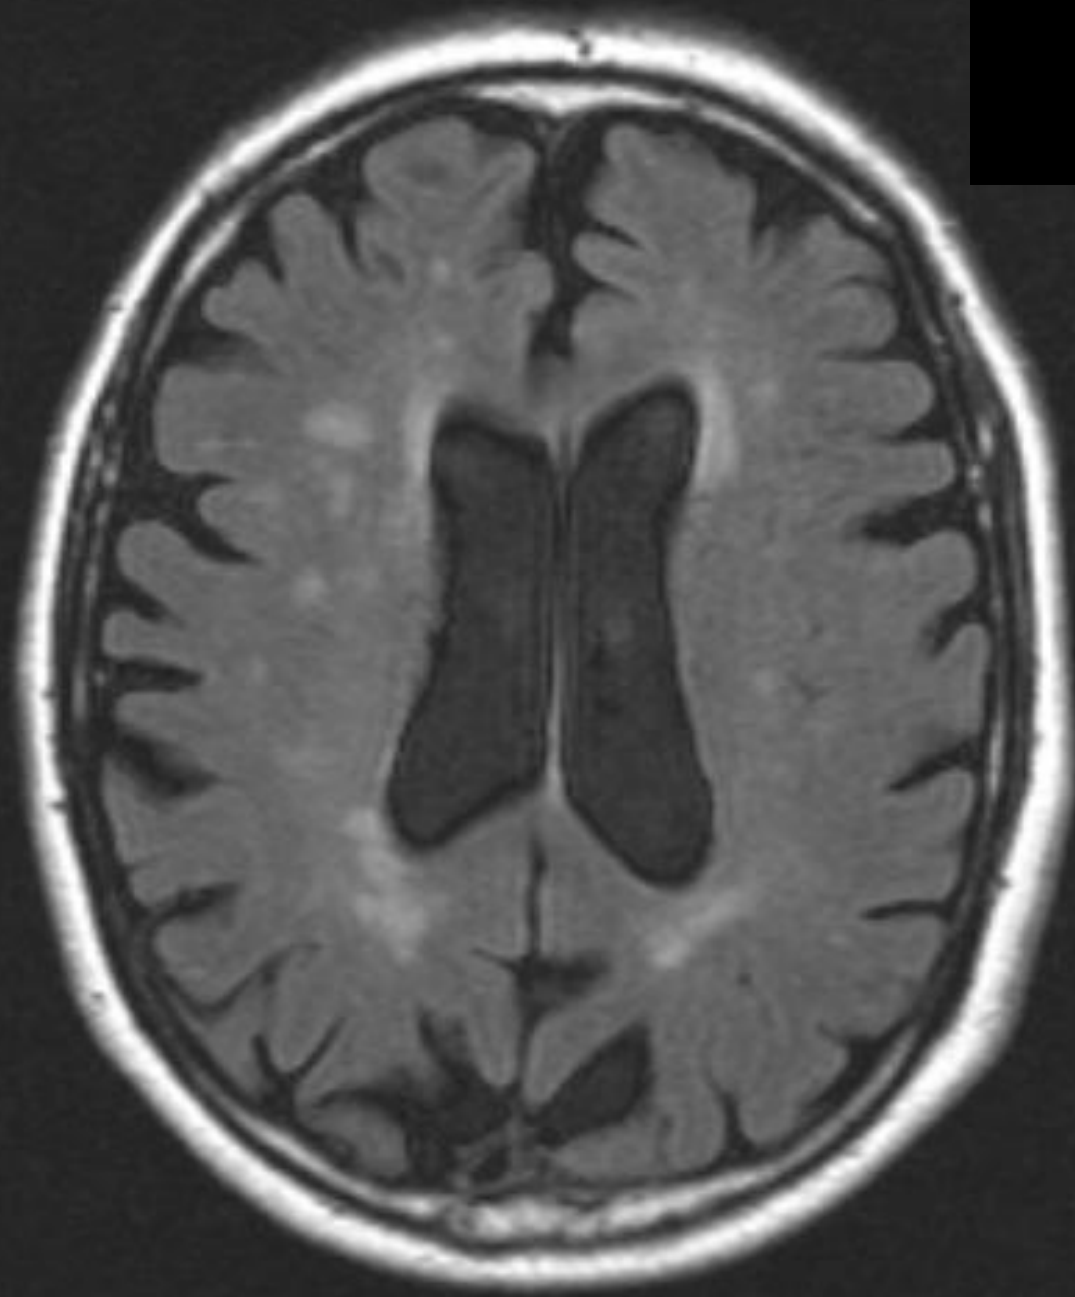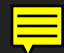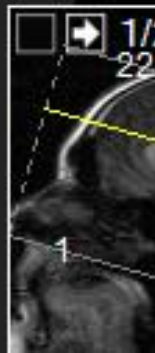

Supplement: 13244_2016_521_MOESM7_ESM.pdf [file 13244_2016_521_MOESM7_ESM.pdf]
