# Supplementary material for: Imaging biomarkers of dementia: recommended visual rating scales with teaching cases
Source: PubMed Central journal article supplement (PMC5265189; doi:10.1007/s13244-016-0521-6), 2016-12-21
Supplement: 13244_2016_521_MOESM8_ESM.pdf [file 13244_2016_521_MOESM8_ESM.pdf]

1

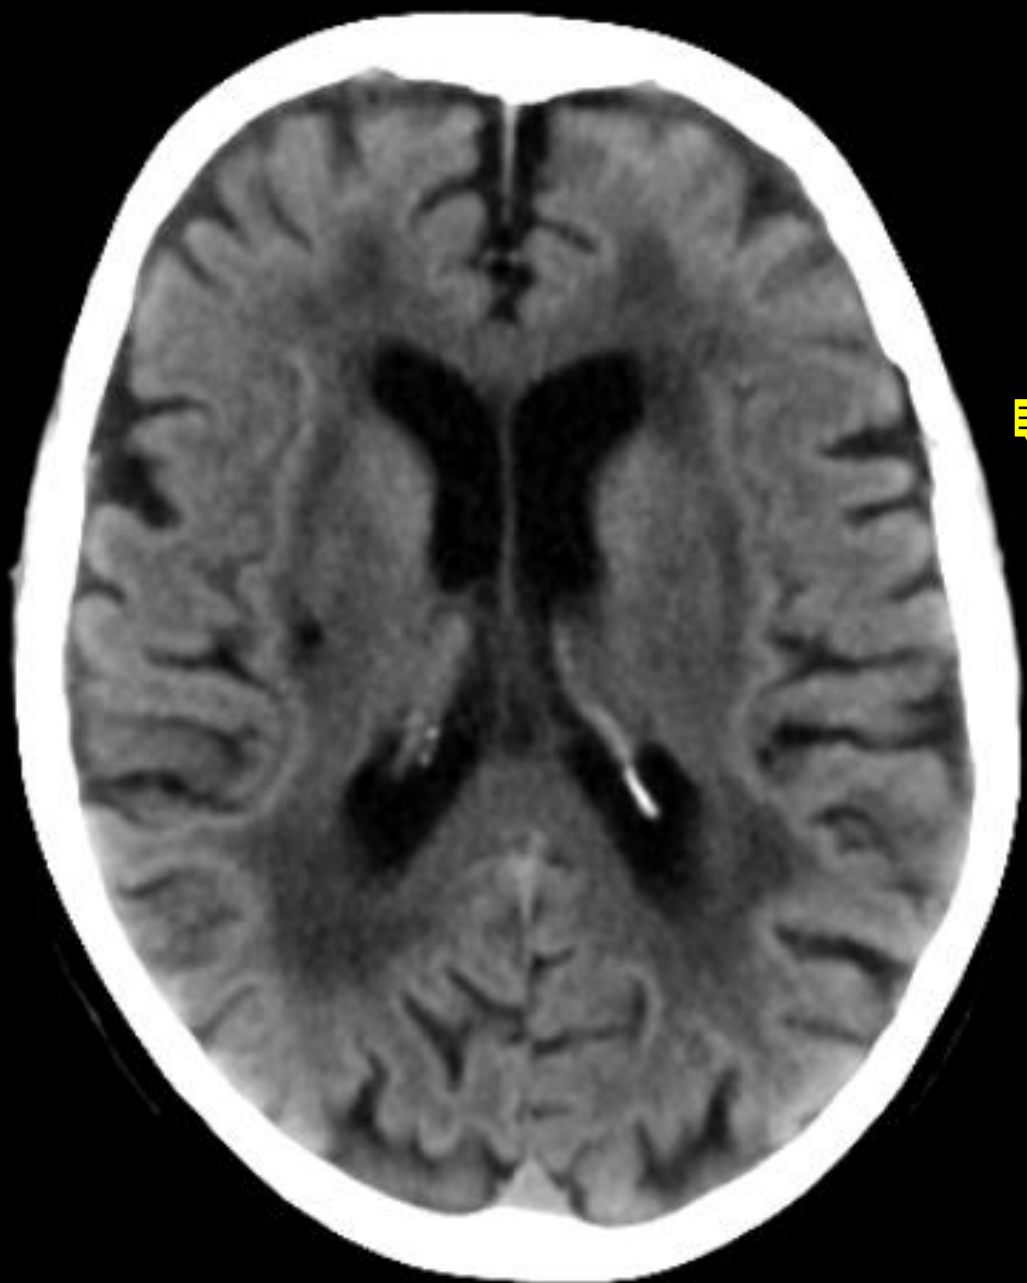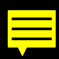

1/10

68

2

A small thumbnail image in the bottom right corner showing a cross-section of a brain. A yellow line is drawn across the image, possibly indicating a measurement or a specific anatomical location. The numbers 68 and 2 are visible next to the image.

2

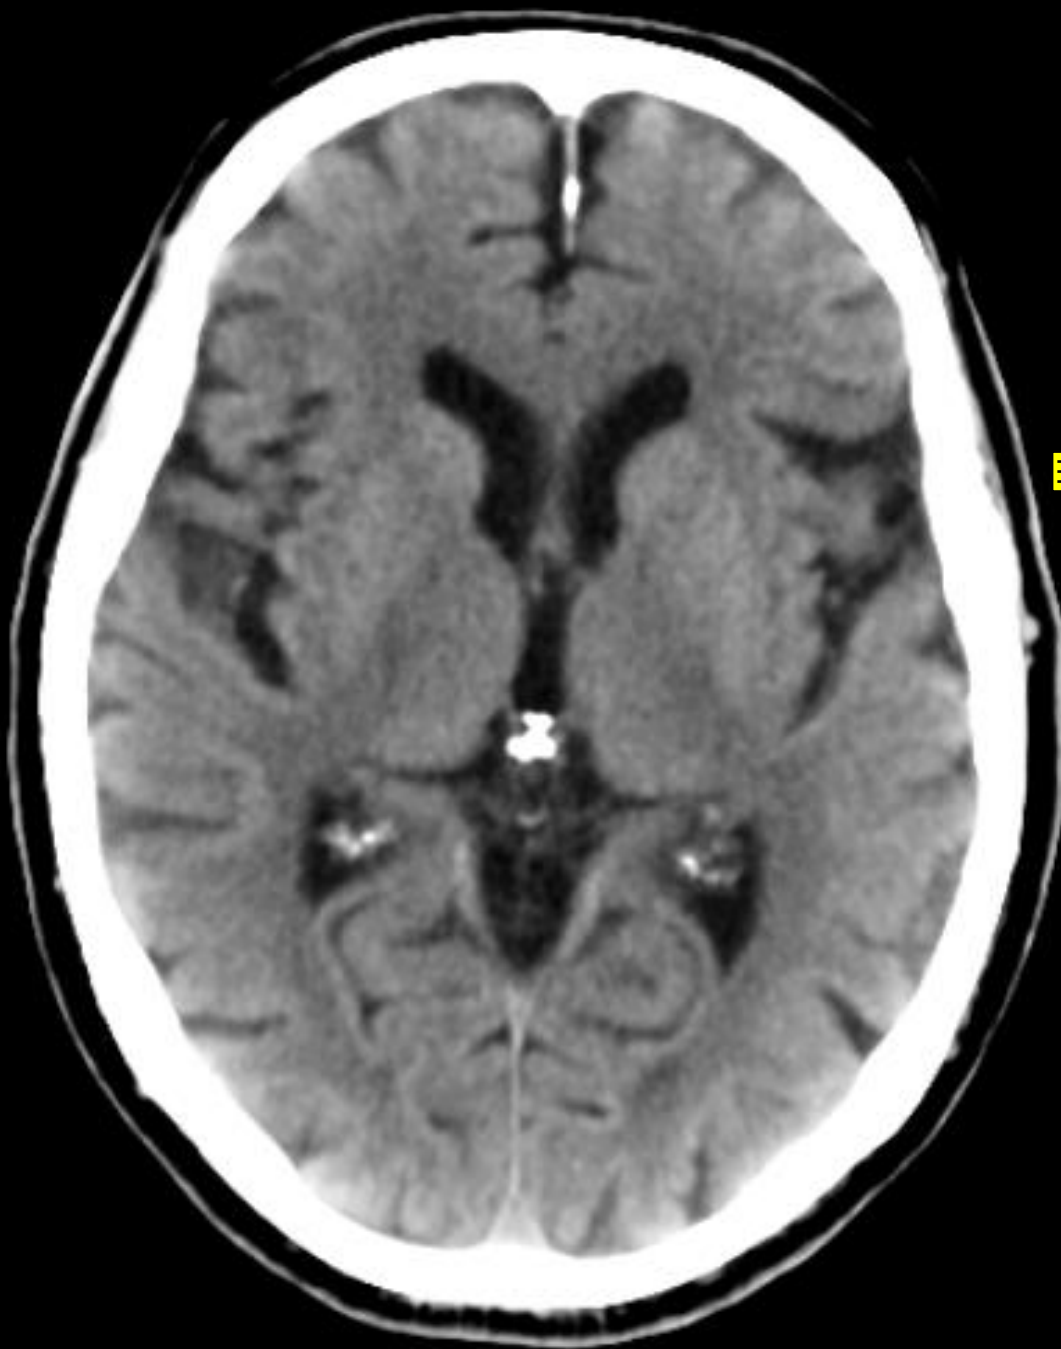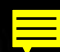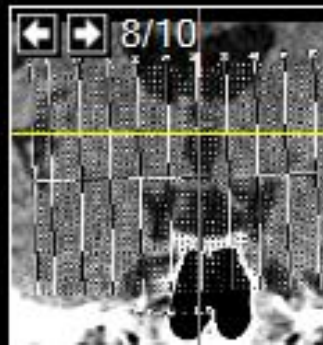

3

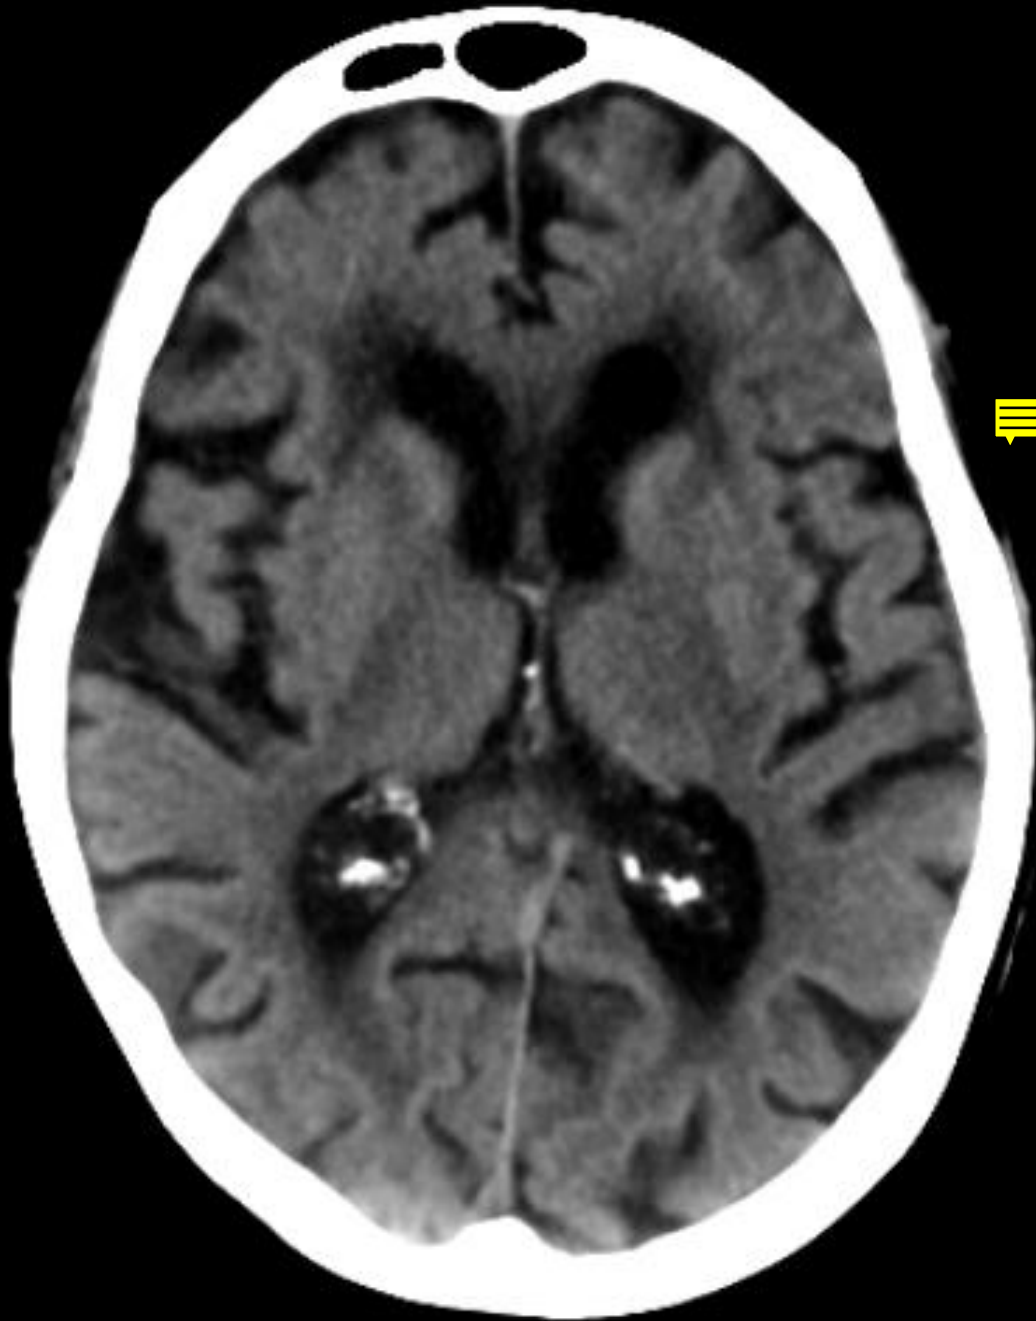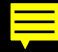

1/10

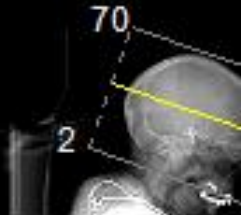

4

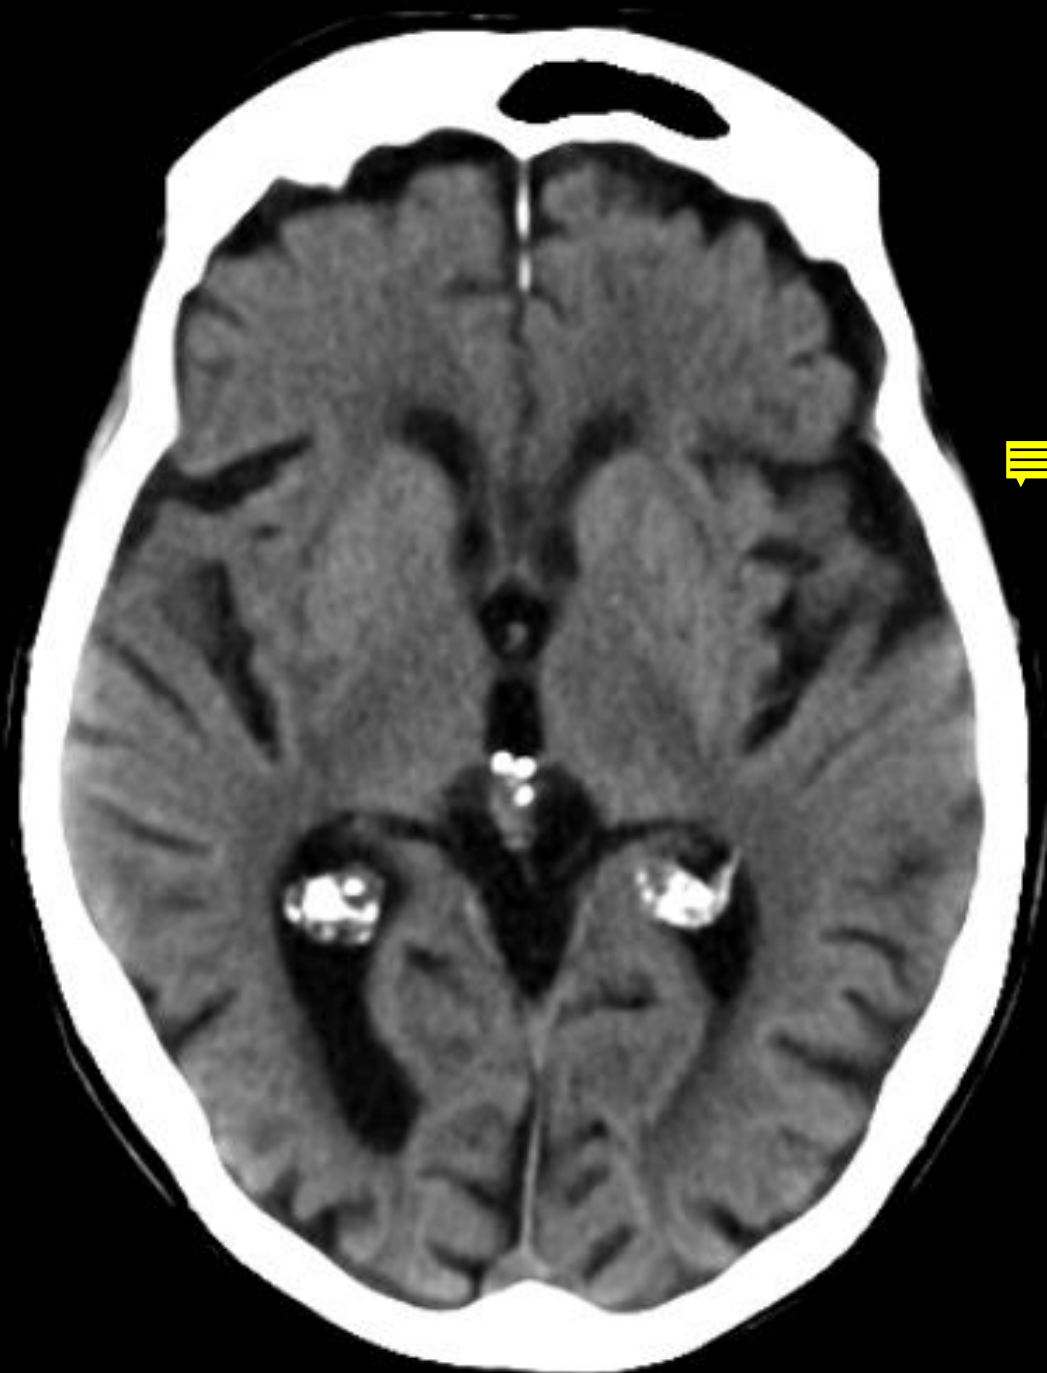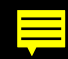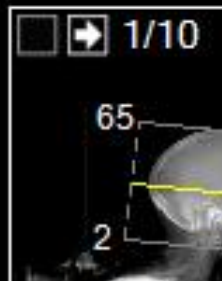

5

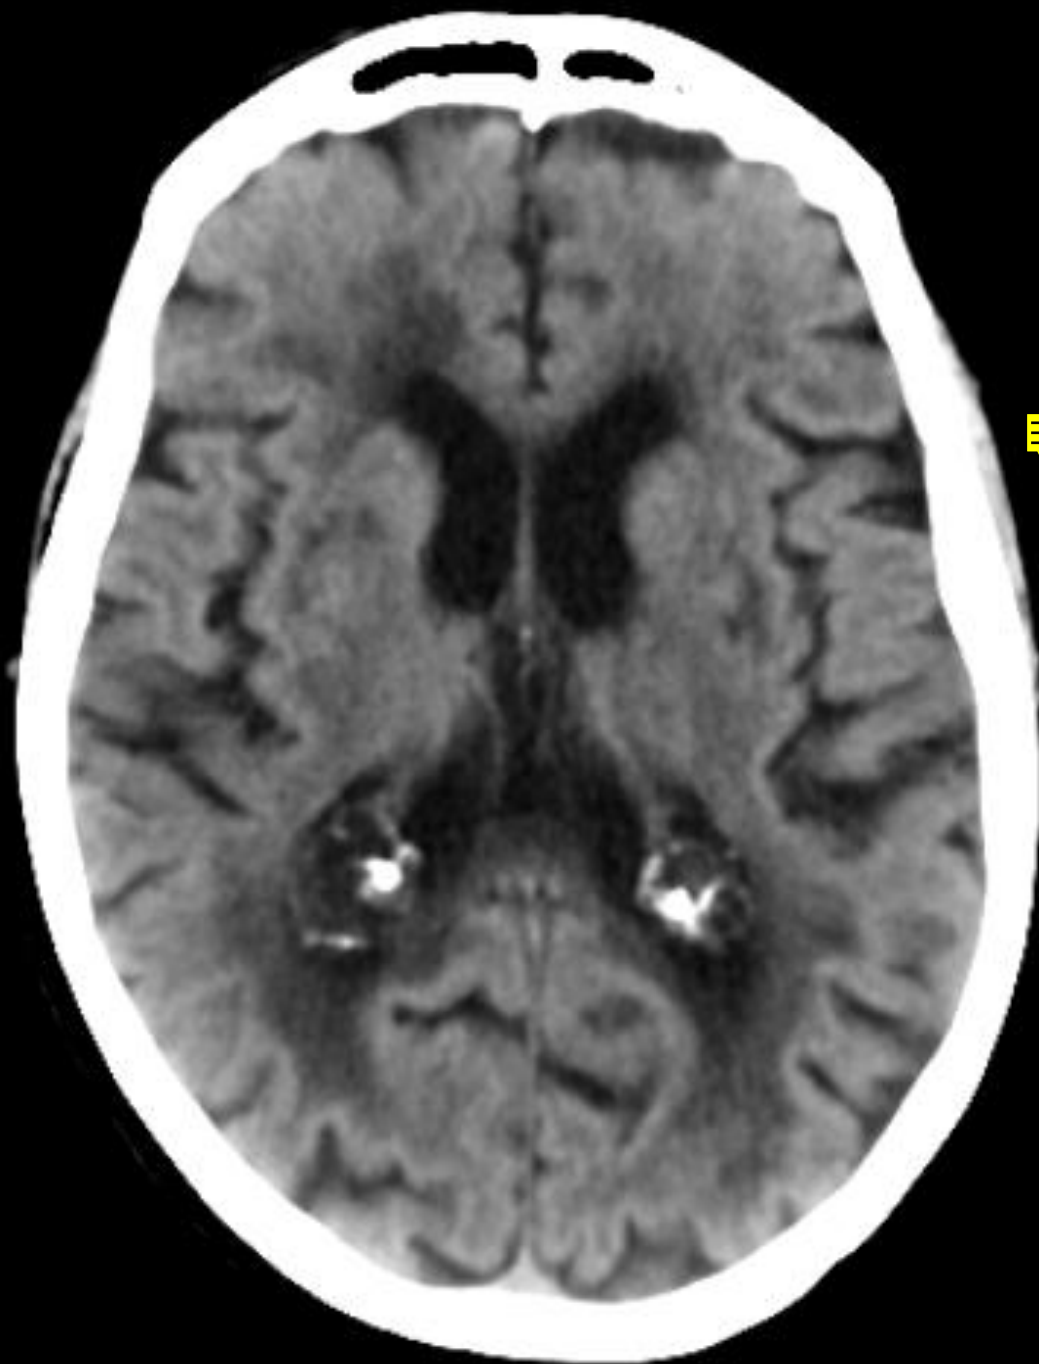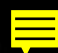

1/10

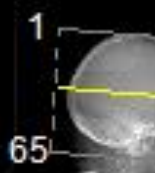

6

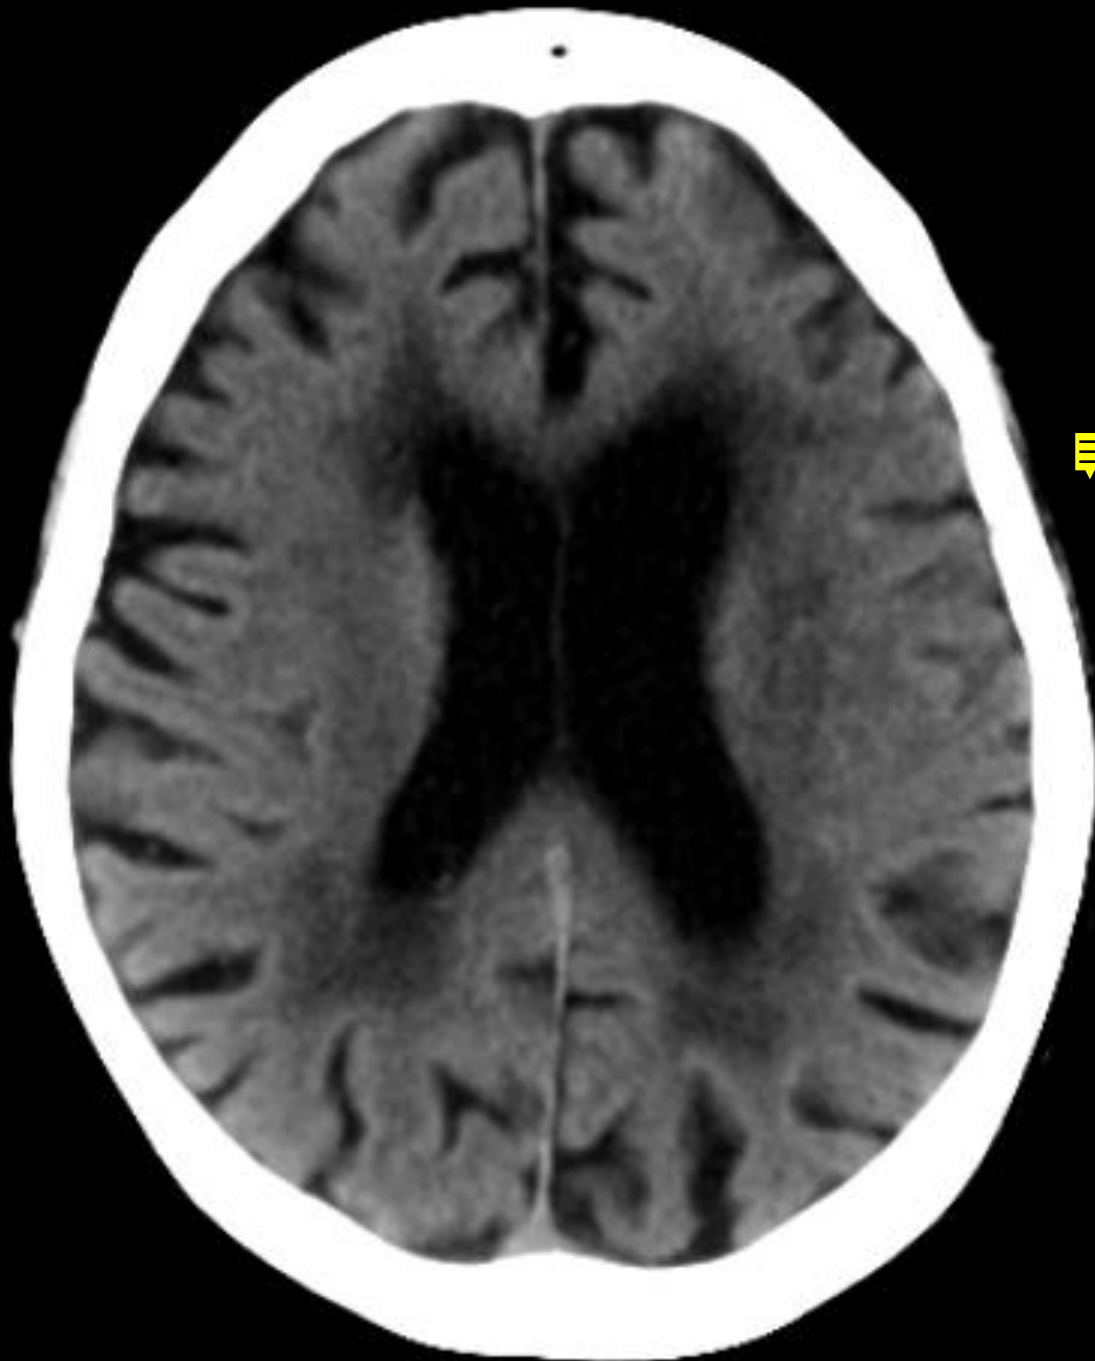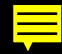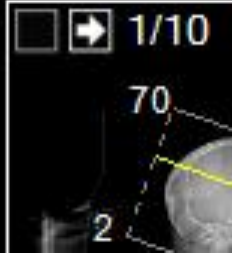

7

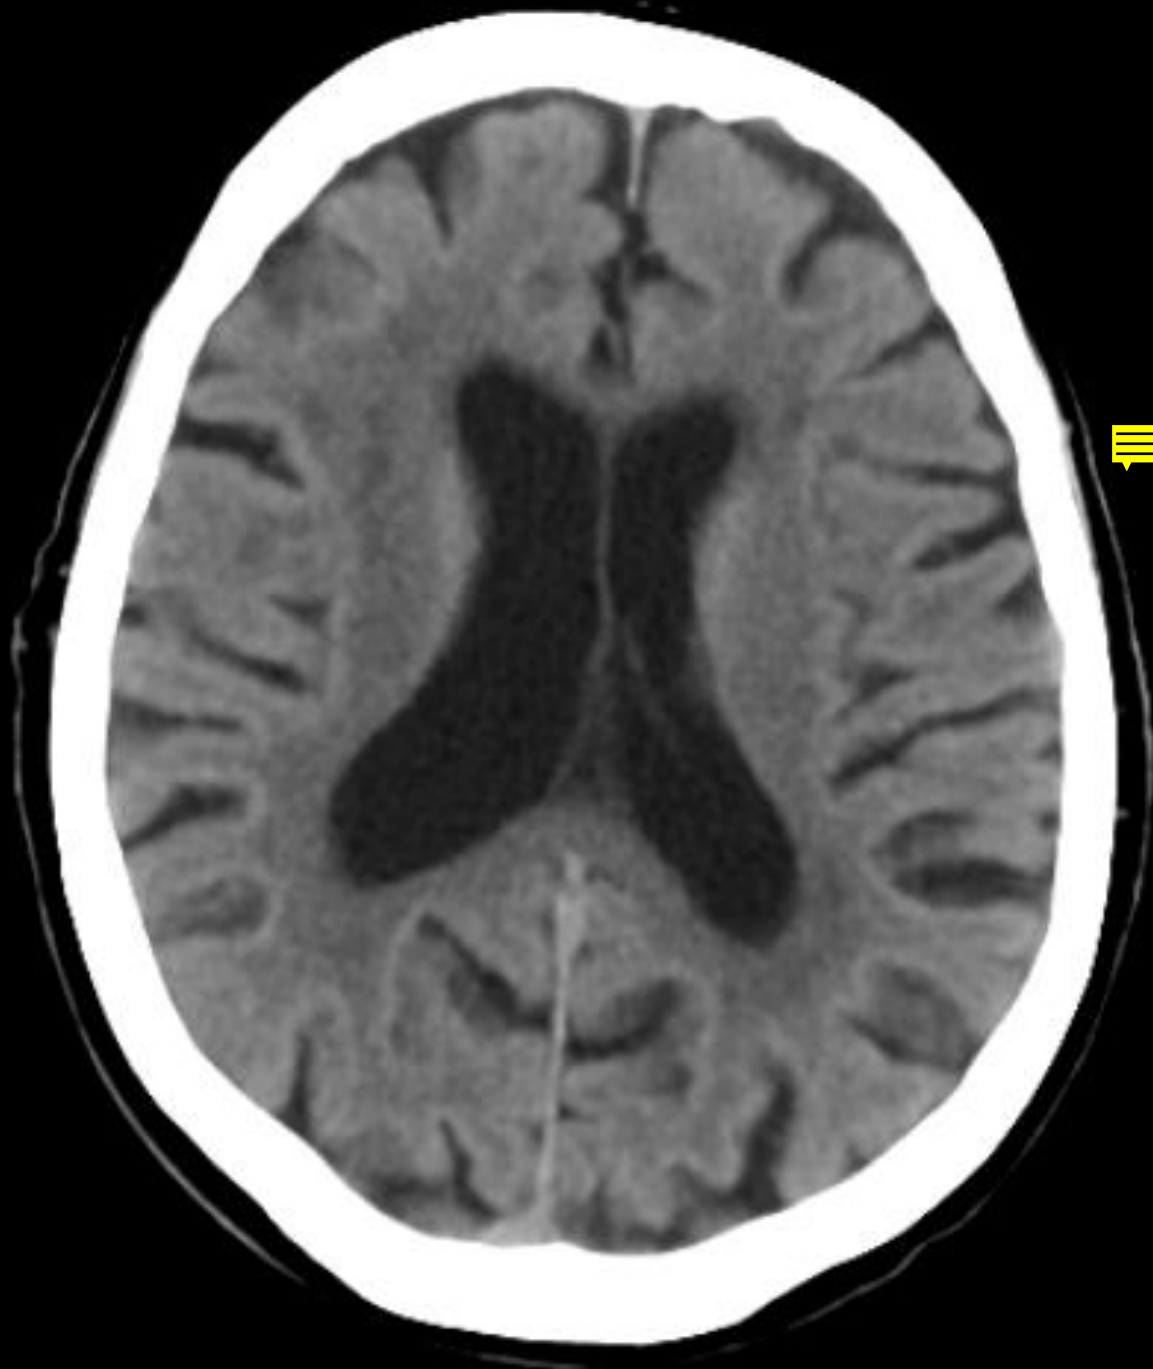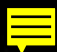

1/10

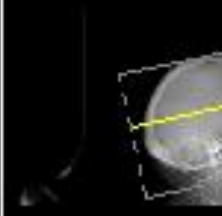

8

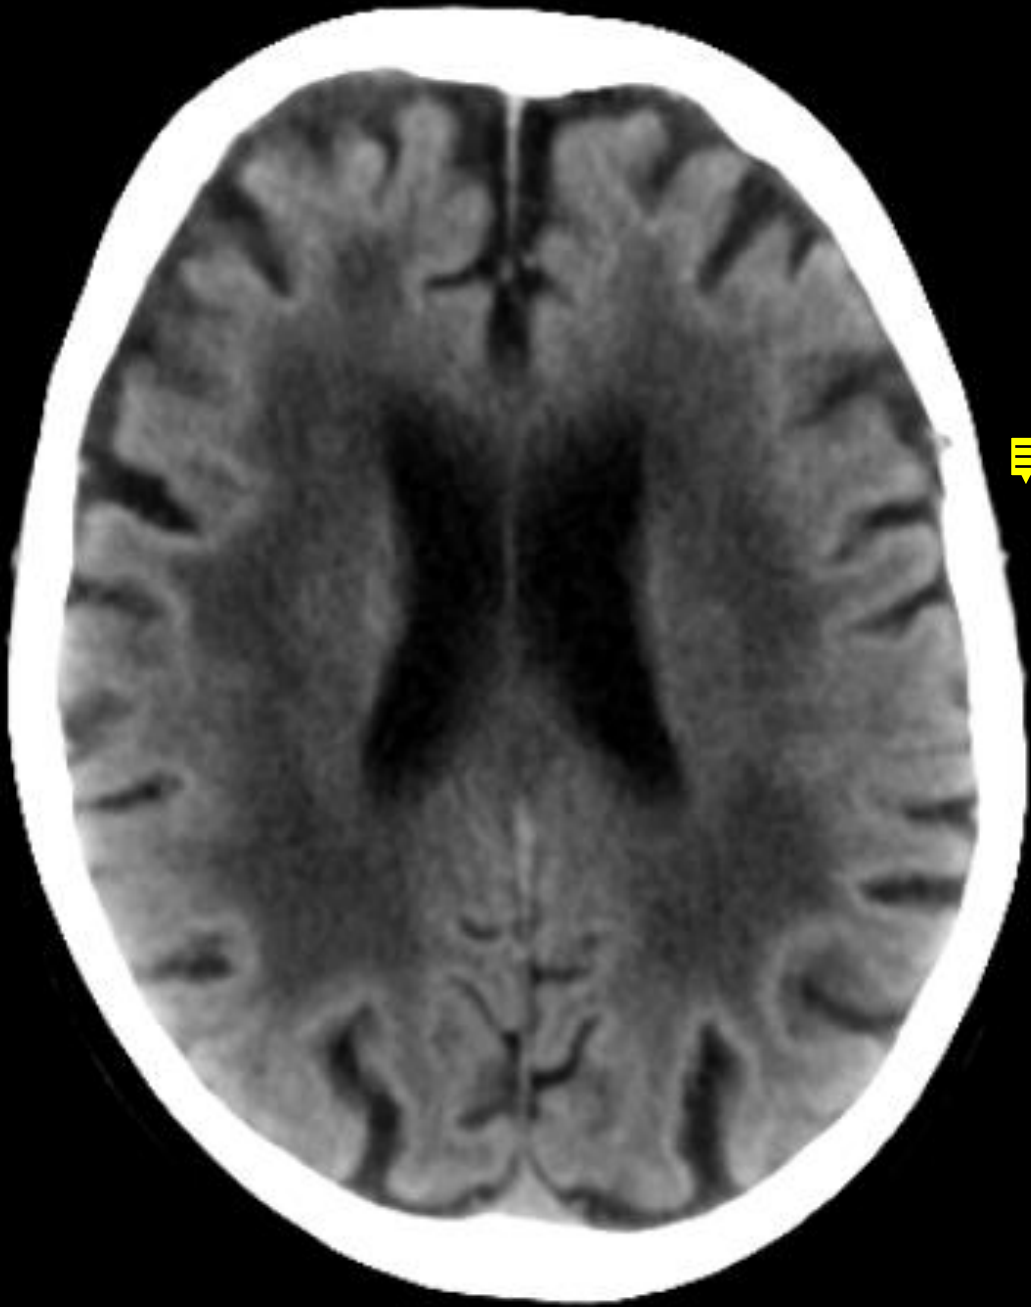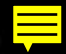

1/10

68

2

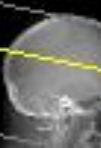



9

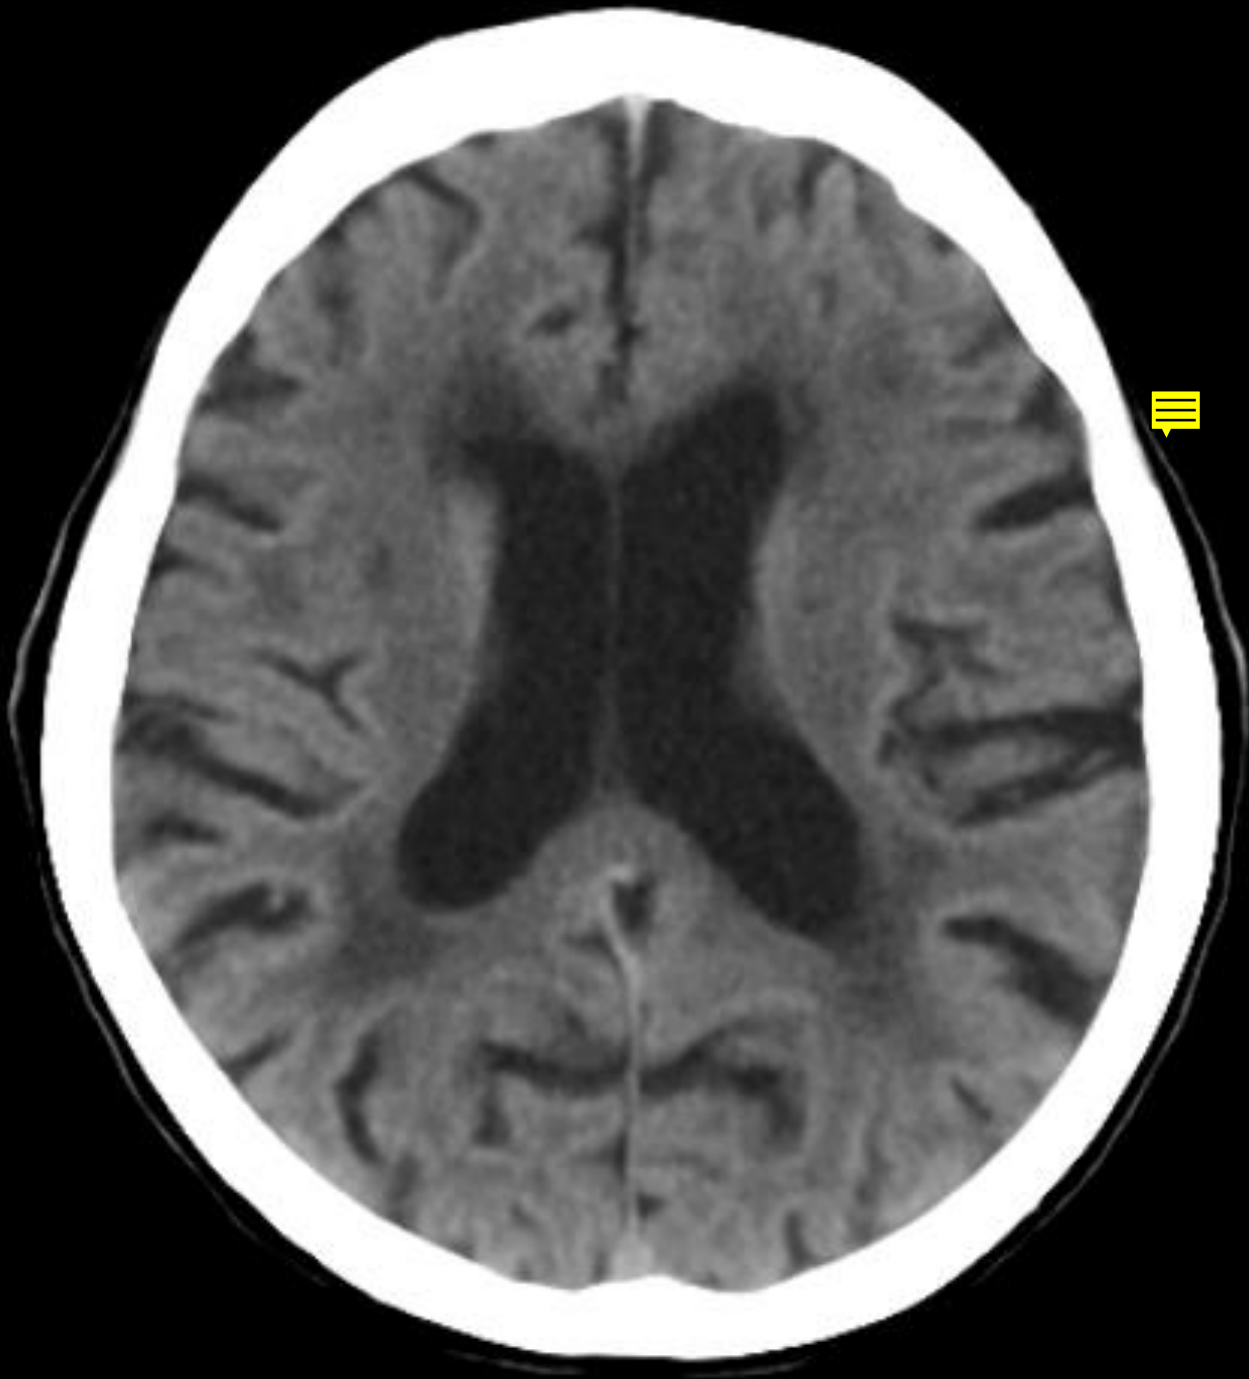

1/

51

2

10

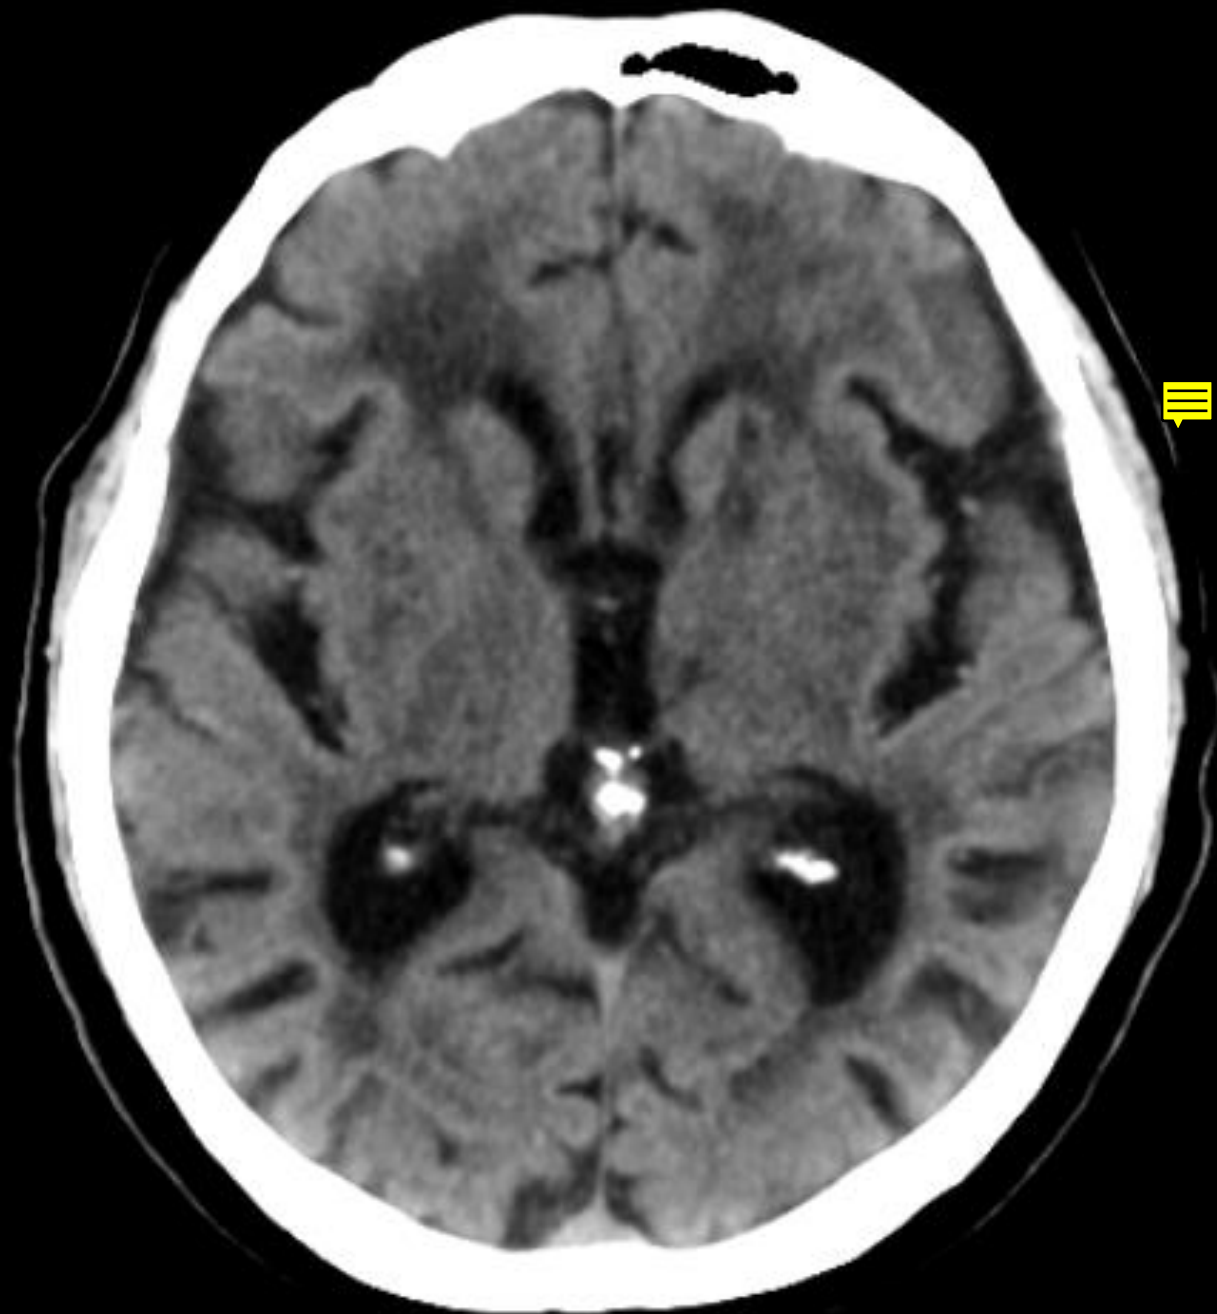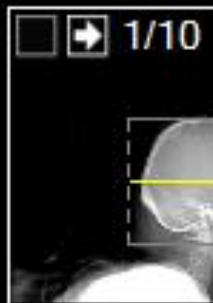

11

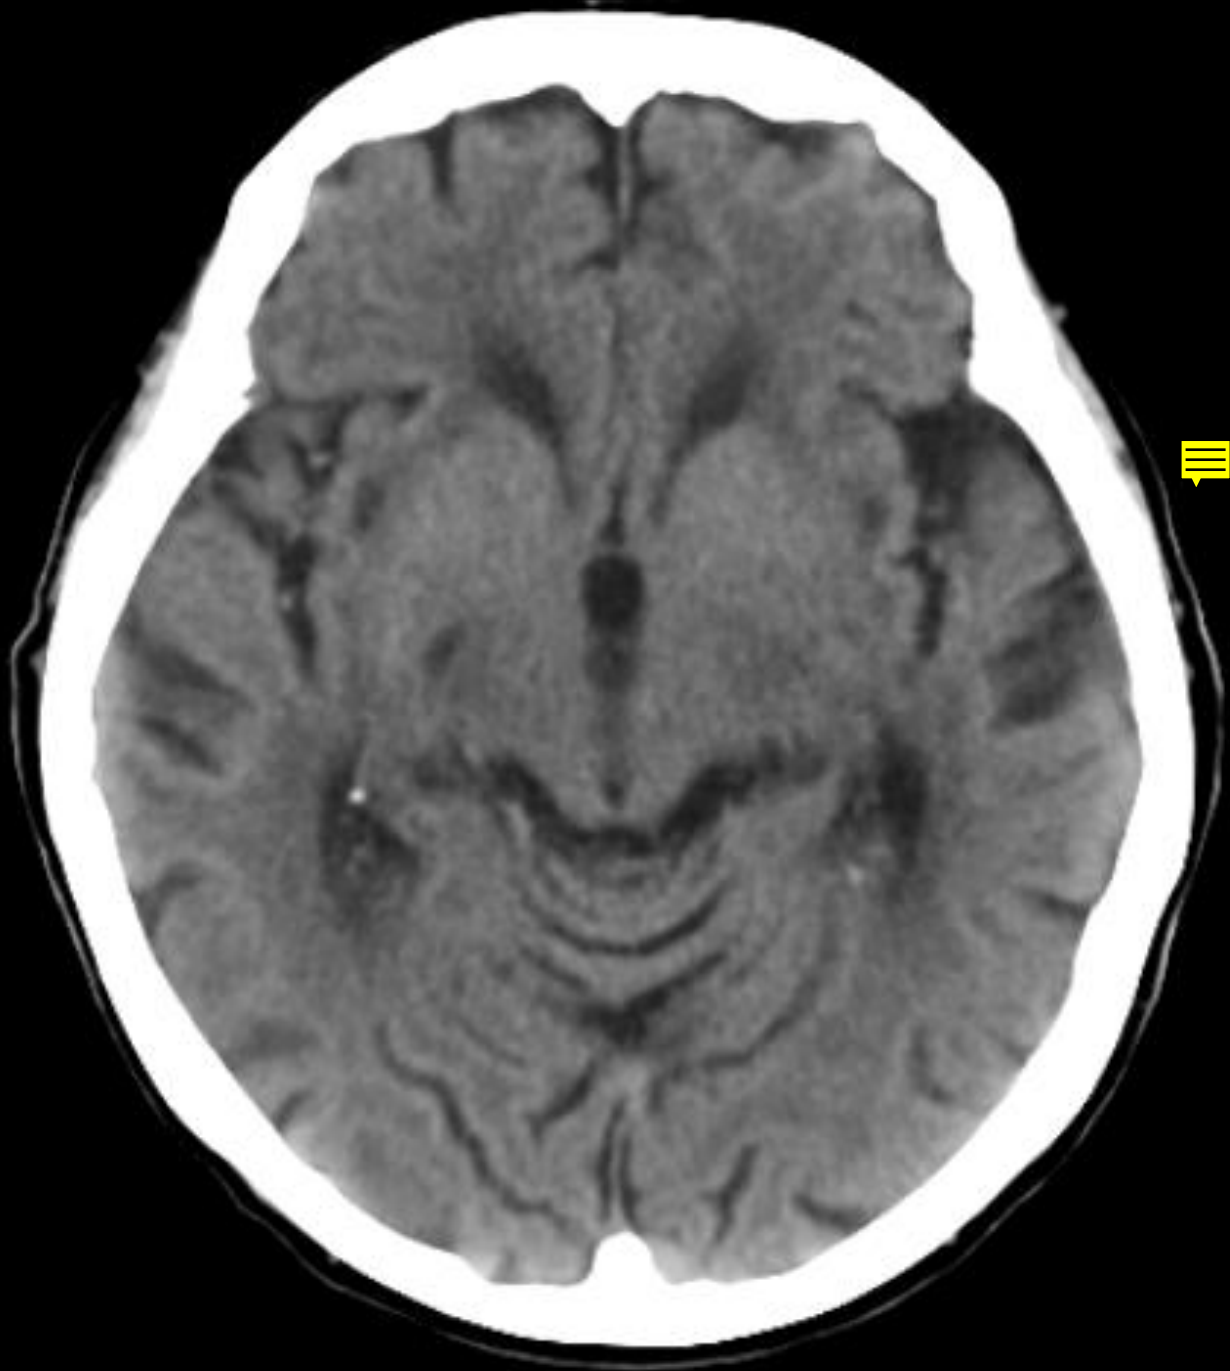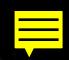

1/10  
51  
2

Navigation controls including a square button, a right-pointing arrow, and the text '1/10'. Below this are the numbers '51' and '2'. To the right is a small inset image showing a cross-section of a sphere with a yellow line indicating a specific slice.

12

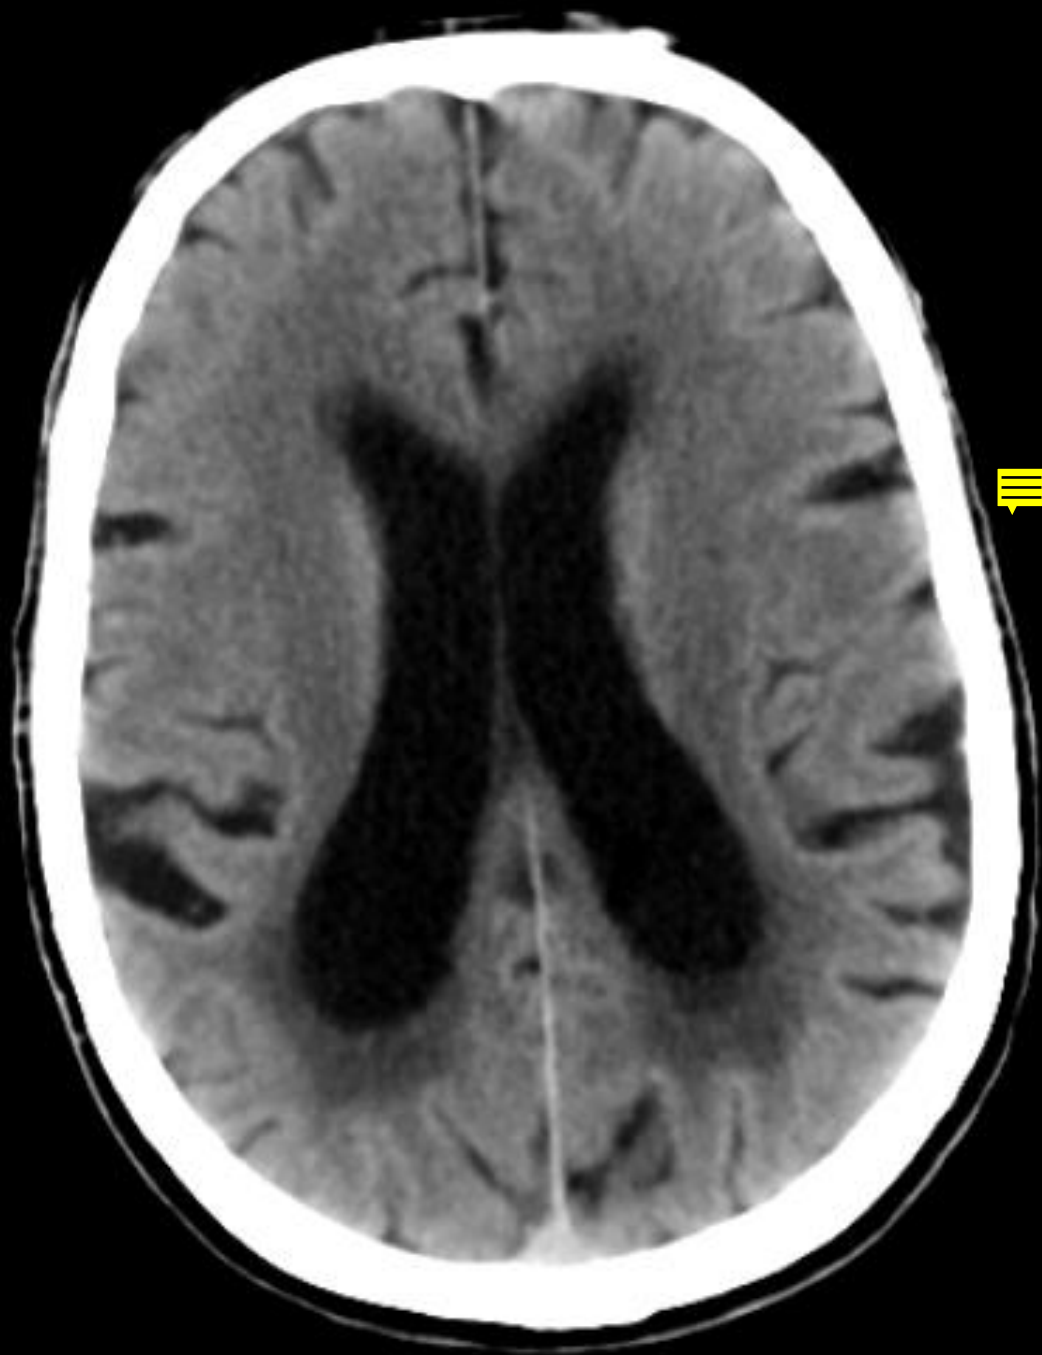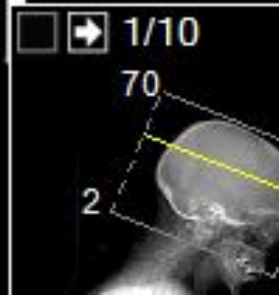

13

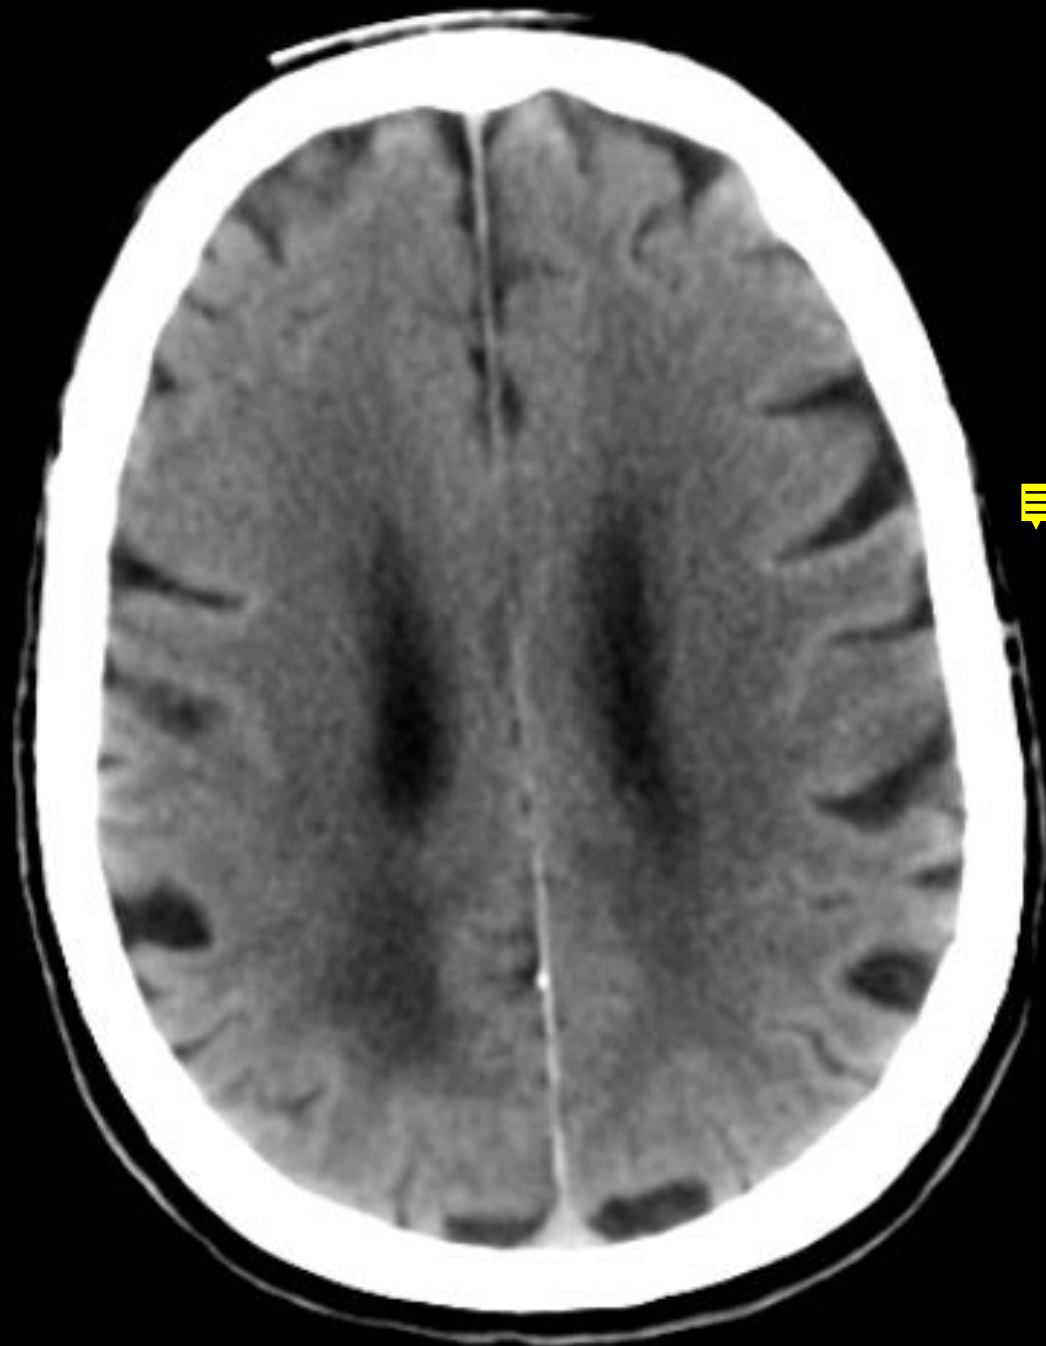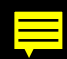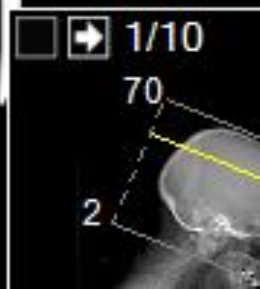

14

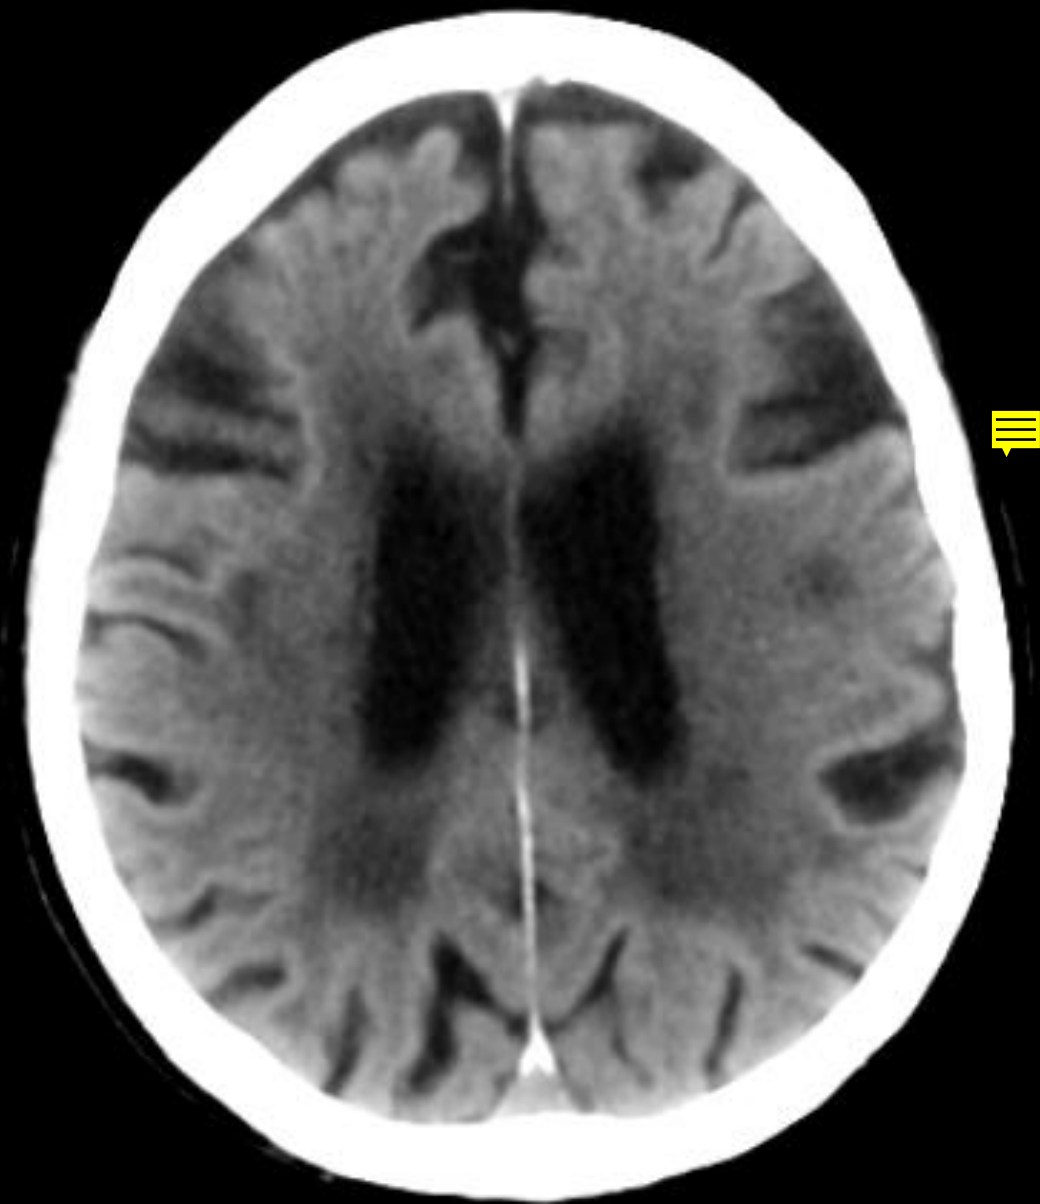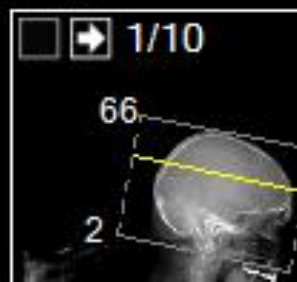

15

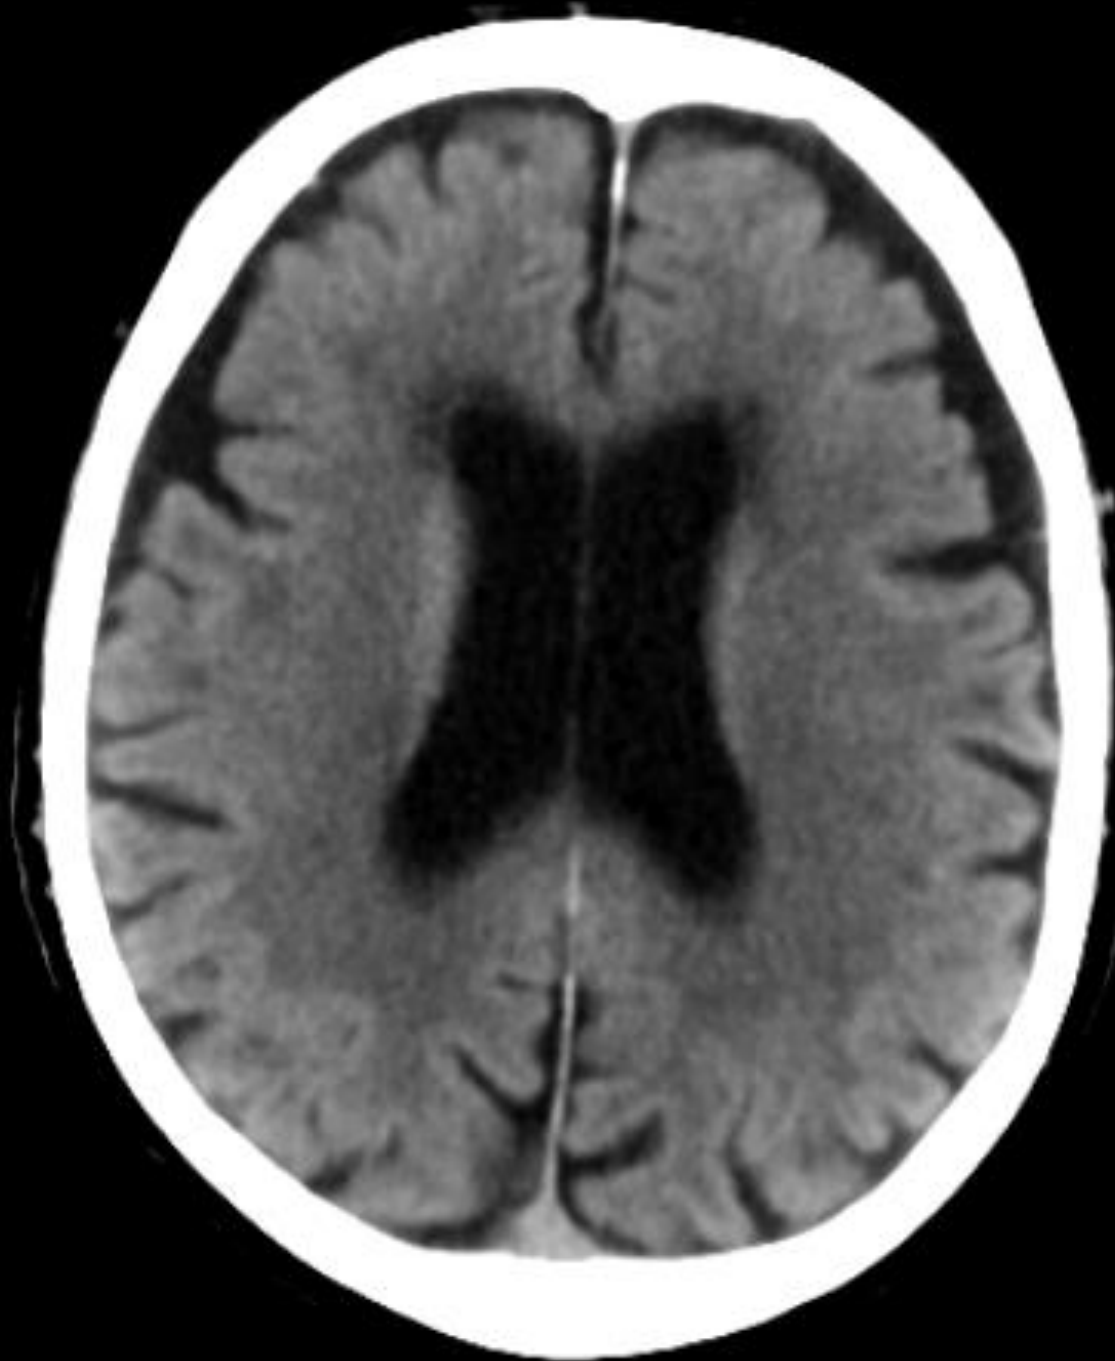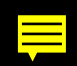

1/1

68

2

A small inset image in the bottom right corner showing a zoomed-in view of a brain region, possibly a lesion or area of interest, with a yellow arrow pointing to it. The inset shows a cross-section of the brain with a yellow arrow pointing to a specific area.

16

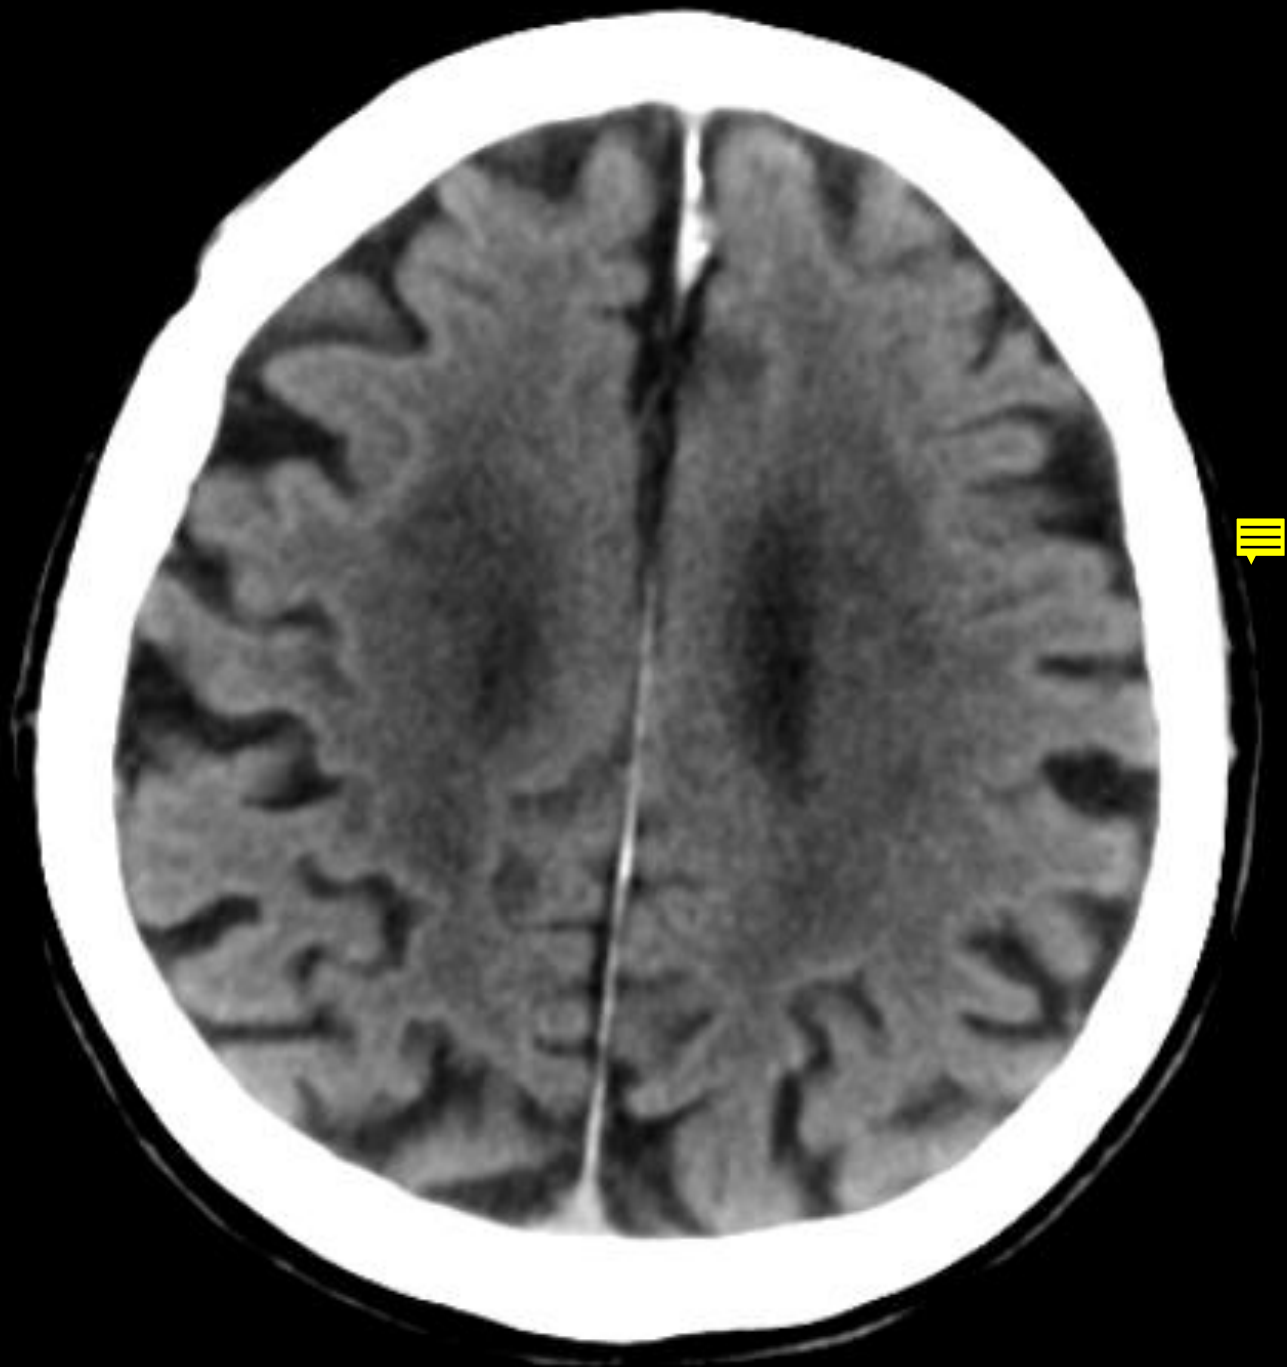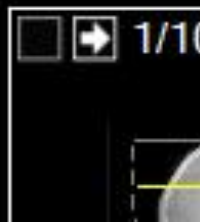



17

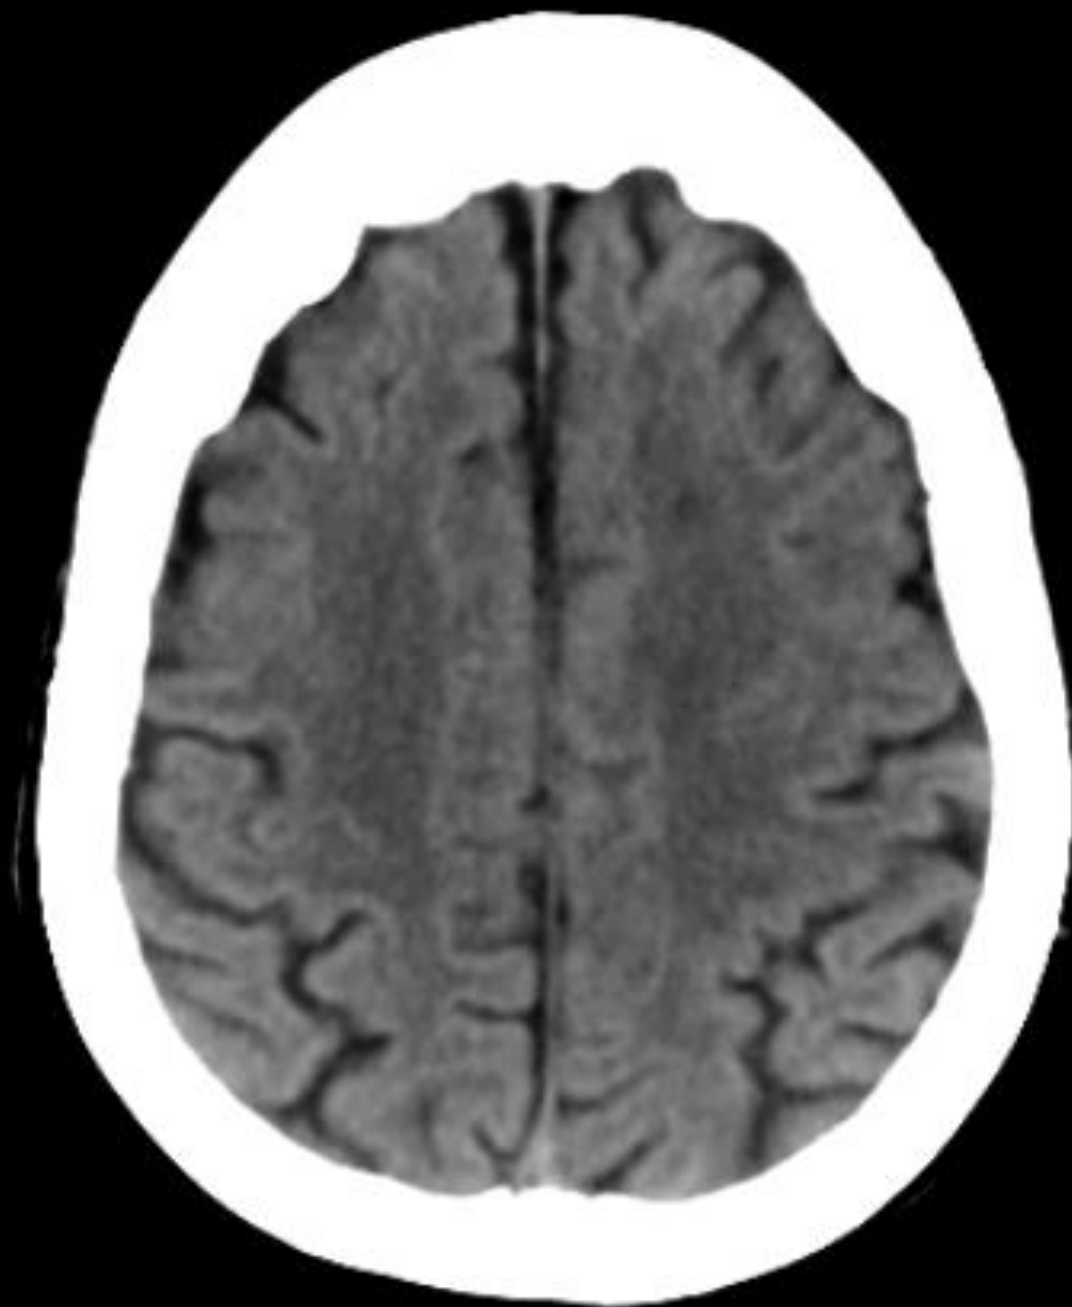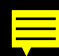

18

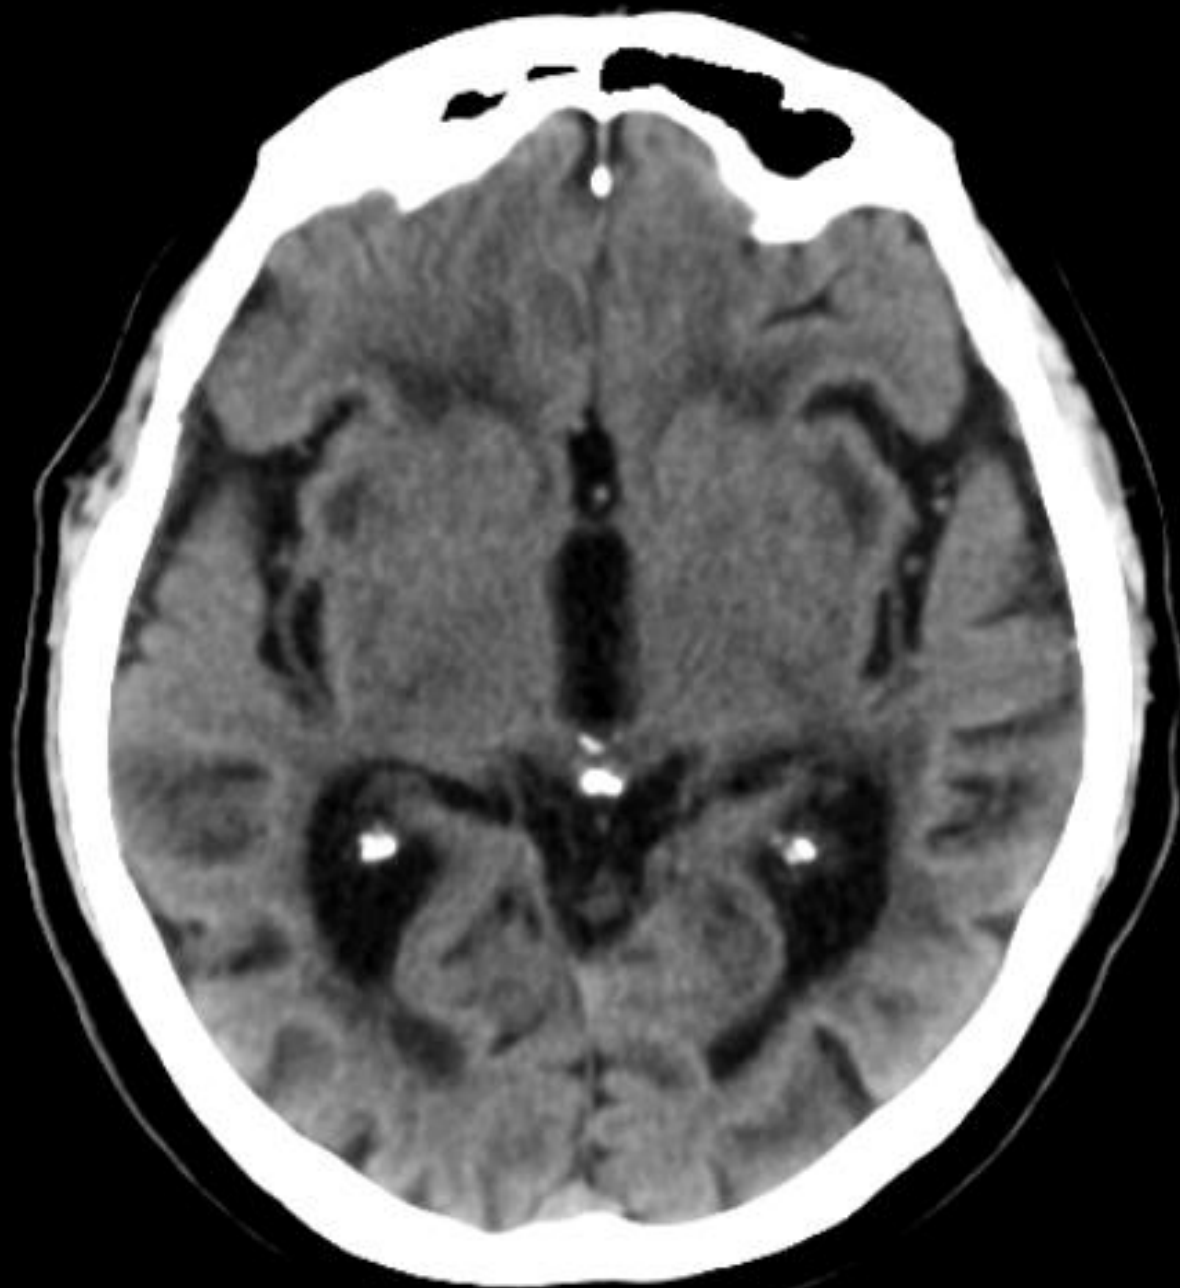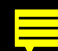

1/10

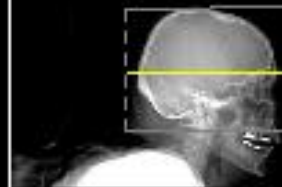

19

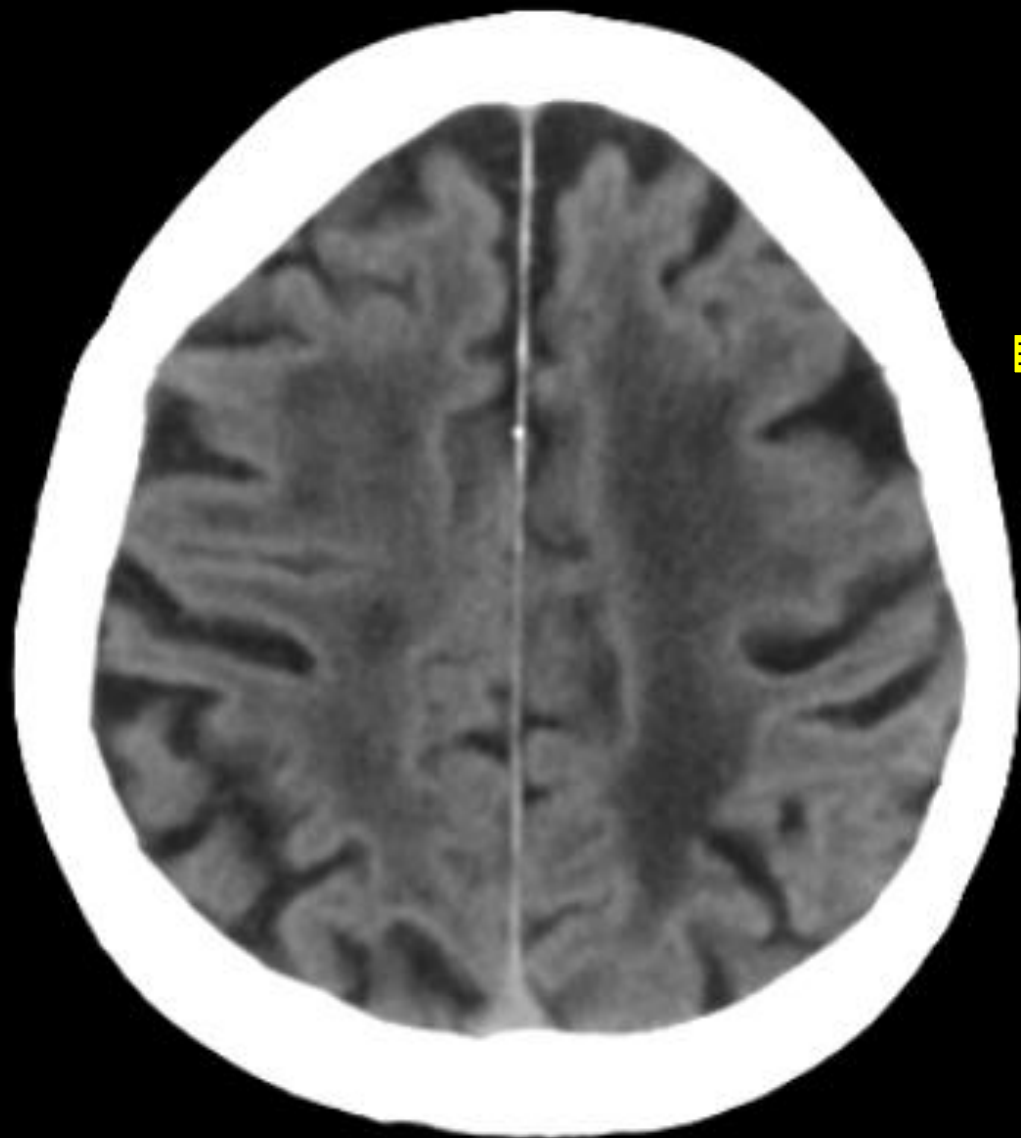

III

1/10

68

A control panel for the CT scan viewer. It includes a square button, a right-pointing arrow, and the text '1/10'. Below this is a vertical scale with the number '68' and a horizontal line indicating the current slice level. To the right is a small circular icon representing the brain slice.

20

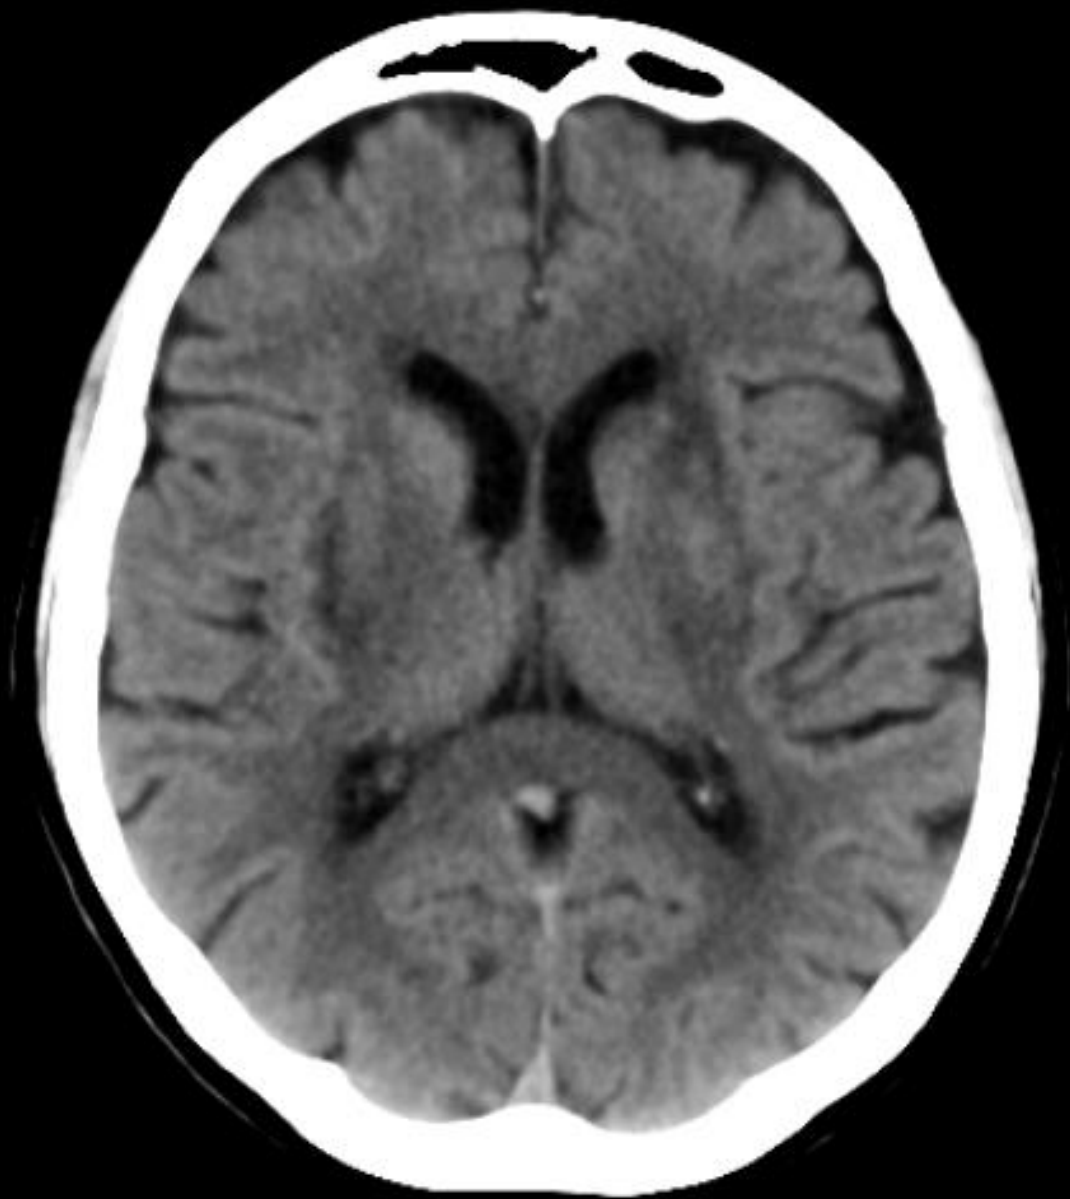

III

1/10

60  
2

F

A small inset window in the bottom right corner shows a thumbnail of the current scan. It includes a navigation bar with a square icon, a right arrow, and the text '1/10'. Below the navigation bar is a small image of the brain with a yellow horizontal line indicating a measurement of 60 units. A smaller yellow horizontal line below it indicates a measurement of 2 units. The letter 'F' is positioned at the bottom of the inset.
